# Supplementary material for: Salivary microRNAs Show Potential as a Noninvasive Biomarker for Detecting Resectable Pancreatic Cancer
Source: Oxford University Press journal article supplement (doi:10.1158/1940-6207.capr-14-0192), 2014-12-23
Supplement: 19406207capr140192-sup-133304_1_supp_data_2712986_nd4j42.xls [file 19406207capr140192-sup-133304_1_supp_data_2712986_nd4j42.xls]

## Sheet: subject info
sample No.	gender	age(year)	ethnicity	chief complaint	tumor size(maximum diameter,cm)	cancer staging	tumour location	lymph nodes metastasis	histopathologic type	total bilirubin(μmol/ml)	CA19-9(U/ml)	miR-1273g-3p	miR-3676-5p	miR-3679-5p	miR-3940-5p	miR-4327	miR-4433-5p	miR-4442	miR-4665-3p	miR-5100	miR-940
PC-1	female	46	Han Chinese	adominal pain	6	2	head	positive	ductal adenocarcinoma	116.3	5436.5	0.626254	0.0298834	0.140144	0.493436	0.00358434	1.87221	0.135582	0.274591	0.476056	2.13421
PC-2	female	70	Han Chinese	jaundice	4	2	head	positive	ductal adenocarcinoma	226.3	12000	3.45863	1.13778	0.534309	0.538195	5.44585	1.26817	7.32845	0.850129	1.40711	0.46738
PC-3	male	55	Han Chinese	adominal pain	1.6	2	tail	positive	mucinous cystadenocarcinoma	9.6	30.27	0.841073	0.458149	0.0920575	0.191339	1.53187	0.744448	1.64936	0.388761	0.201344	0.322865
PC-4	female	56	Han Chinese	adominal pain	5	2	head	positive	ductal adenocarcinoma	191.5	1173.37	6.97416	3.0459	7.07009	1.87175	7.17266	4.71871	7.67141	9.75362	7.52168	3.07656
PC-5	male	69	Han Chinese	weight loss	7	1	head	negative	mucinous cystadenocarcinoma	11.4	35.83	0.545299	2.01508	1.55627	1.15626	0.429206	1.4921	0.0743723	1.44287	1.81783	0.682611
PC-6	male	66	Han Chinese	jaundice	3	1	head	negative	ductal adenocarcinoma	311.6	669.77	3.68067	89.2773	3.75136	189.633	13.0408	64.6529	4.56767	12.0943	12.5717	35.5531
PC-7	female	77	Han Chinese	adominal pain	2.1	2	head	positive	ductal adenocarcinoma	86.4	3437.5	0.315753	0.705599	2.40946	0.263097	1.48884	0.016821	0.422261	0.196317	0.159704	0.233836
PC-8	female	69	Han Chinese	adominal pain	3.8	3	tail	positive	ductal adenocarcinoma	12.5	26.24	0.124197	0.166034	1.45866	0.18226	0.559506	0.0738877	0.554506	0.329775	0.270082	0.177846
sample No.	gender	age(year)	ethnicity	miR-1273g-3p	miR-3676-5p	miR-3679-5p	miR-3940-5p	miR-4327	miR-4433-5p	miR-4442	miR-4665-3p	miR-5100	miR-940
H-1	male	48	Han Chinese	0.0735797	0.0414789	87.9175	1.11538	0.169414	3.96204	0.379229	2.24916	0.144156	0.139297
H-2	female	66	Han Chinese	0.00618063	1.58819	0.0849532	0.0398886	4.18151	0.00173391	2.97762	0.0195266	1.72326	0.00141904
H-3	female	55	Han Chinese	0.396246	0.420231	10.7322	0.365616	0.897215	0.55139	1.241	0.354753	0.132872	0.0261201
H-4	male	70	Han Chinese	1.34814	0.985746	6.47993	0.539104	1.78418	1.29634	2.47068	0.626168	0.310128	0.0829663
H-5	female	71	Han Chinese	1.52845	0.411393	5.40519	0.660609	0.765775	1.41794	0.0557748	1.59496	0.255738	0.0180687
H-6	male	56	Han Chinese	5.58704	4.52558	7.63201	110.975	18.6216	52.9904	9.13091	21.9037	12.1663	2.62155
H-7	female	66	Han Chinese	0.271772	0.792466	4.61249	0.290337	1.33141	1.26465	0.515445	0.197892	0.214157	0.0666248
H-8	female	61	Han Chinese	29.7359	24.9233	341.872	13.923	28.0175	5.58908	28.0043	15.773	12.0434	1.49751
sample No.	gender	age(year)	ethnicity	chief complaint	tumor size(maximum diameter,cm)	cancer staging	tumour location	lymph nodes metastasis	histopathologic type	total bilirubin(μmol/ml)	CA19-9(U/ml)	miR-3679-5p	miR-940	Smoking habit
PC-9	male	72	Han Chinese	weight loss	3.5	3	tail	positive	ductal adenocarcinoma	39.24	1000.12	0.009993	5.79446	yes
PC-10	female	52	Han Chinese	adominal pain	4.5	3	head	positive	ductal adenocarcinoma	9.9	12.12	0.138765	0.730797	no
PC-11	male	77	Han Chinese	adominal pain	3	3	head	positive	ductal adenocarcinoma	73.4	1000.22	0.182856	3.23637	no
PC-12	male	37	Han Chinese	jaundice	4	1	head	negative	ductal adenocarcinoma	156.8	31.59	0.011079	30.0177	no
PC-13	female	65	Han Chinese	adominal pain	6	2	head	negative	ductal adenocarcinoma	71.3	12000	0.029972	14.9338	no
PC-14	male	72	Han Chinese	jaundice	2.5	2	head	negative	acinar cell carcinoma	384.5	2.58	0.398527	4.7926	yes
PC-15	male	13	Han Chinese	adominal pain	3	2	head	negative	ductal adenocarcinoma	198.1	36.61	0.123084	2.19093	yes
PC-16	female	59	Han Chinese	adominal pain	3.7	3	head	positive	ductal adenocarcinoma	14.5	244.34	0.778885	0.890986	no
PC-17	male	78	Han Chinese	adominal pain	3	3	body	positive	ductal adenocarcinoma	10.2	27.3	3.88967	7.49836	yes
PC-18	female	50	Han Chinese	anorexia	1.4	3	head	positive	ductal adenocarcinoma	136.3	28	0.212438	10.918	no
PC-19	male	68	Han Chinese	adominal pain	6	3	body & tail	positive	ductal adenocarcinoma	8.8	2707.91	0.942446	1.09721	yes
PC-20	male	81	Han Chinese	jaundice	3	3	head	positive	ductal adenocarcinoma	20.5	31.08	0.000694	0.14406	yes
PC-21	male	81	Han Chinese	jaundice	6	2	head	positive	mucinous cystadenocarcinoma	21.8	29.47	0.012913	1.29093	yes
PC-22	female	52	Han Chinese	adominal pain	9	3	body & tail	positive	ductal adenocarcinoma	13.5	63.56	1.01007	1.0023	no
PC-23	female	59	Han Chinese	adominal pain	5	3	body & tail	positive	ductal adenocarcinoma	15.1	1000.21	0.95419	5.65728	no
PC-24	male	48	Han Chinese	adominal pain	5.2	1	head	negative	ductal adenocarcinoma	9.6	31.69	1.29718	0.967304	yes
PC-25	male	55	Han Chinese	adominal pain	7	2	head	positive	ductal adenocarcinoma	98	12.48	1.35396	0.909918	yes
PC-26	male	59	Han Chinese	adominal pain	4.2	3	body & tail	positive	ductal adenocarcinoma	9.1	10809.1	0.032855	2.87662	yes
PC-27	male	57	Han Chinese	discovered by health checkup	6	3	head	positive	ductal adenocarcinoma	7.2	33.04	0.000522	4.5893	yes
PC-28	male	52	Han Chinese	adominal pain	5	2	body & tail	positive	ductal adenocarcinoma	9.6	1674.16	0.143983	4.60726	yes
PC-29	male	78	Han Chinese	jaundice	4	2	head	positive	ductal adenocarcinoma	271.1	21.57	3.79452	8.07675	no
PC-30	male	60	Han Chinese	adominal pain	4	1	head	negative	ductal adenocarcinoma	313.1	12000	0.813783	4.37518	yes
PC-31	male	47	Han Chinese	adominal pain	2.1	1	body	negative	ductal adenocarcinoma	7	14.45	3.12116	3.20704	yes
PC-32	male	64	Han Chinese	adominal pain	3.6	3	body & tail	positive	ductal adenocarcinoma	13.7	12000	0.040837	0.065201	yes
PC-33	male	76	Han Chinese	adominal pain	3.3	3	head	positive	ductal adenocarcinoma	222.8	12000	1.75485	4.01011	yes
PC-34	male	49	Han Chinese	adominal pain	2.6	3	neck	positive	ductal adenocarcinoma	8.4	28.35	3.94862	4.05727	yes
PC-35	male	72	Han Chinese	adominal pain	3.5	3	head	positive	ductal adenocarcinoma	12.6	1138.97	0.199738	0.390964	yes
PC-36	male	80	Han Chinese	adominal pain	1.8	3	head	positive	ductal adenocarcinoma	9	661.68	0.082952	0.852443	yes
PC-37	male	67	Han Chinese	jaundice	5.4	3	head	positive	ductal adenocarcinoma	170.1	15.87	0.13186	31.8806	yes
PC-38	female	54	Han Chinese	jaundice	5	1	head	negative	acinar cell carcinoma	296.9	4.26	1.07302	3.70252	no
PC-39	female	65	Han Chinese	adominal pain	5.1	3	head	positive	ductal adenocarcinoma	8.8	2395.69	0.076129	10.4057	no
PC-40	male	62	Han Chinese	adominal pain	3.4	3	head	positive	ductal adenocarcinoma	147.7	494.6	0.417693	3.56016	yes
PC-41	male	49	Han Chinese	adominal pain	2.8	3	head	positive	ductal adenocarcinoma	11.3	36.01	4.68175	3.97735	yes
PC-42	female	64	Han Chinese	adominal pain	4	3	head	positive	acinar cell carcinoma	8.8	18	1.72726	0.362941	no
PC-43	male	59	Han Chinese	adominal pain	2.9	3	head	positive	ductal adenocarcinoma	12.7	30.18	3.44678	0.86002	yes
PC-44	female	61	Han Chinese	jaundice	5	3	head	positive	ductal adenocarcinoma	56.3	2	1.14768	2.27144	no
PC-45	female	62	Han Chinese	adominal pain	5	3	neck	positive	ductal adenocarcinoma	10.8	976.44	4.41174	11.0125	no
PC-46	male	51	Han Chinese	jaundice	6	1	head	negative	ductal adenocarcinoma	249.1	25.11	0.707229	1.05993	yes
PC-47	male	48	Han Chinese	adominal pain	3.7	3	head	positive	ductal adenocarcinoma	19.4	1.66	1.41035	0.605742	yes
PC-48	male	55	Han Chinese	adominal pain	5	3	head	positive	ductal adenocarcinoma	263.9	22.55	0.009995	4.32373	yes
sample No.	gender	age(year)	ethnicity	miR-3679-5p	miR-940
H-9	male	61	Han Chinese	0.360045	0.354341
H-10	female	50	Han Chinese	4.37732	3.26257
H-11	male	70	Han Chinese	6.34293	5.29749
H-12	female	34	Han Chinese	1.56033	2.59387
H-13	female	66	Han Chinese	0.096699	0.126421
H-14	female	67	Han Chinese	3.66712	3.06271
H-15	male	23	Han Chinese	1.45735	1.63366
H-16	male	68	Han Chinese	0.073917	0.284778
H-17	female	75	Han Chinese	1.99343	1.93175
H-18	female	49	Han Chinese	2.31923	1.62496
H-19	female	67	Han Chinese	0.190085	0.216951
H-20	male	71	Han Chinese	0.494228	0.442508
H-21	male	70	Han Chinese	0.28342	2.19402
H-22	female	50	Han Chinese	2.24837	0.972076
H-23	female	56	Han Chinese	6.49239	2.35057
H-24	male	48	Han Chinese	0.894043	6.92097
H-25	female	55	Han Chinese	3.87944	4.06055
H-26	male	57	Han Chinese	0.647469	0.265842
H-27	female	54	Han Chinese	0.177392	0.189181
H-28	female	69	Han Chinese	4.55942	4.54572
H-29	male	70	Han Chinese	4.10529	0.379992
H-30	female	54	Han Chinese	7.66126	0.248648
H-31	male	48	Han Chinese	10.9189	0.194869
H-32	male	60	Han Chinese	1.01021	3.81383
H-33	male	70	Han Chinese	0.699849	0.421823
H-34	male	48	Han Chinese	6.23569	0.424708
H-35	female	68	Han Chinese	0.016242	4.02766
H-36	female	68	Han Chinese	0.00366	4.71876
H-37	male	65	Han Chinese	4.24417	3.9497
H-38	male	55	Han Chinese	5.56269	0.204737
H-39	male	66	Han Chinese	0.807844	2.95483
H-40	male	62	Han Chinese	0.093753	1.49286
H-41	male	46	Han Chinese	1.07902	0.029729
H-42	male	65	Han Chinese	0.434225	2.15165
H-43	male	67	Han Chinese	5.35325	1.46623
H-44	male	39	Han Chinese	0.808517	2.98633
H-45	male	63	Han Chinese	0.58831	5.26454
H-46	male	50	Han Chinese	1.35963	0.058662
H-47	male	48	Han Chinese	2.32524	0.521158
H-48	male	56	Han Chinese	0.847146	0.936505
sample No.	gender	age(year)	ethnicity	chief complaint	tumor size(maximum diameter,cm)	tumour location	histopathologic type	total bilirubin(μmol/ml)	CA19-9(U/ml)	miR-3679-5p	miR-940
BPT-1	female	61	Han Chinese	adominal pain	3	head	chronic inflammation	172.8	575.4	3.90413	0.318333
BPT-2	female	40	Han Chinese	adominal pain	3	head	chronic inflammation	14.7	15.87	2.34998	0.791197
BPT-3	female	64	Han Chinese	adominal pain	2.5	head	papillary epithelioma	10.2	12.31	4.57038	7.31543
BPT-4	female	43	Han Chinese	adominal pain	3.4	head	chronic inflammation	13.9	1000.33	40.02	3.04732
BPT-5	female	35	Han Chinese	adominal pain	7	tail	mucinus cystadenoma	9.9	15.57	4.21125	3.89721
BPT-6	female	55	Han Chinese	adominal pain	6.5	body & tail	papillary epithelioma	8.4	3.9	6.76809	1.79329
BPT-7	male	46	Han Chinese	adominal pain	3	body & tail	chronic inflammation	6.7	0.6	0.685874	5.08345
BPT-8	male	48	Han Chinese	adominal pain	3	body & tail	chronic inflammation	14	43.45	0.084706	0.601794
BPT-9	male	54	Han Chinese	adominal pain	1.5	body & tail	chronic inflammation	101.2	50.46	17.4661	1.36057
BPT-10	male	66	Han Chinese	jaundice	2	head	autoimmune pancreatitis	23.1	53.77	1.9792	0.040482
BPT-11	male	36	Han Chinese	adominal pain	3	body & tail	chronic inflammation	13	31.7	0.107772	0.202479
BPT-12	male	56	Han Chinese	discovered by health checkup	2	body	papillary epithelioma	11.4	23.04	1.08687	1.44842
BPT-13	male	36	Han Chinese	jaundice	3.2	head	chronic inflammation	239.3	75.8	0.853393	3.49334
BPT-14	male	34	Han Chinese	jaundice	5.2	head	granulomatous inflammation	89.7	85.56	0.25402	0.331491
BPT-15	male	75	Han Chinese	discovered by health checkup	4	tail	chronic inflammation	11.8	2	0.270078	0.201252
BPT-16	male	62	Han Chinese	adominal pain	2.6	head	autoimmune pancreatitis	196.5	76.52	0.331761	1.35806
BPT-17	male	47	Han Chinese	adominal pain	3.4	body	chronic inflammation	17.6	21.32	15.6575	0.063355
BPT-18	male	79	Han Chinese	adominal pain	5.1	head	leiomyoma	13.7	40.48	1.63995	0.029741
BPT-19	male	50	Han Chinese	adominal pain	6	head	fibroplasia	16.4	70.11	1.29013	0.249932
BPT-20	male	42	Han Chinese	discovered by health checkup	2	neck	papillary epithelioma	8.9	3.52	1.26723	2.01057
