# Supplementary material for: Salivary microRNAs Show Potential as a Noninvasive Biomarker for Detecting Resectable Pancreatic Cancer
Source: Oxford University Press journal article supplement (doi:10.1158/1940-6207.capr-14-0192), 2014-12-23
Supplement: 19406207capr140192-sup-133304_1_supp_data_2713000_ndwjwc.xls [file 19406207capr140192-sup-133304_1_supp_data_2713000_ndwjwc.xls]

## Sheet: 5
PC=Pancreatic Cancer		H=Healthy control
SystematicName	pvalues	p values corrected for FDR	foldchange	PC-1	PC-2	PC-3	PC-4	PC-5	PC-6	PC-7	PC-8	H-1	H-2	H-3	H-4	H-5	H-6	H-7	H-8
hsa-let-7a-3p	2.43e-05	0.00023796	1.15066	-3.08291	-3.10814	-3.01235	-3.03369	-3.07446	-3.09603	-3.22205	-3.13428	-3.27834	-3.32109	-3.32191	-3.27732	-3.28825	-3.31458	-3.28764	-3.28542
hsa-let-7a-5p	0.0569709	0.0860105	0.198618	-3.08291	-3.10814	-3.01235	-3.03369	-3.07446	-3.09603	-3.22205	-3.13428	0.419577	0.554514	-0.155896	-0.725495	-3.28825	-3.31458	-3.28764	-3.28542
hsa-let-7b-3p	2.43e-05	0.00023796	1.15066	-3.08291	-3.10814	-3.01235	-3.03369	-3.07446	-3.09603	-3.22205	-3.13428	-3.27834	-3.32109	-3.32191	-3.27732	-3.28825	-3.31458	-3.28764	-3.28542
hsa-let-7b-5p	0.41182	0.453146	1.00819	-3.08291	1.69625	-3.01235	-3.03369	-3.07446	-3.09603	-3.22205	-3.13428	-0.714654	0.665169	-0.231738	-0.801346	-3.28825	-3.31458	-3.28764	-3.28542
hsa-let-7c	0.525878	0.815507	0.676748	-3.08291	-3.10814	-3.01235	-3.03369	-3.07446	-3.09603	-3.22205	-3.13428	-3.27834	-0.725495	-2.59618	-3.27732	-3.28825	-3.31458	-3.28764	-3.28542
hsa-let-7d-3p	0.48324	0.564707	1.03399	-3.08291	-3.10814	-3.01235	-3.03369	-3.07446	-3.09603	-3.22205	-3.13428	-3.27834	-2.56906	-3.01848	-3.27732	-3.28825	-3.31458	-3.28764	-3.28542
hsa-let-7d-5p	0.671523	0.836322	0.860099	-3.08291	-3.10814	-3.01235	-3.03369	-3.07446	-3.09603	-3.22205	-3.13428	-3.27834	-1.67955	-2.61789	-3.27732	-3.28825	-3.31458	-3.28764	-3.28542
hsa-let-7e-3p	2.43e-05	0.00023796	1.15066	-3.08291	-3.10814	-3.01235	-3.03369	-3.07446	-3.09603	-3.22205	-3.13428	-3.27834	-3.32109	-3.32191	-3.27732	-3.28825	-3.31458	-3.28764	-3.28542
hsa-let-7e-5p	2.43e-05	0.00023796	1.15066	-3.08291	-3.10814	-3.01235	-3.03369	-3.07446	-3.09603	-3.22205	-3.13428	-3.27834	-3.32109	-3.32191	-3.27732	-3.28825	-3.31458	-3.28764	-3.28542
hsa-let-7f-1-3p	2.43e-05	0.00023796	1.15066	-3.08291	-3.10814	-3.01235	-3.03369	-3.07446	-3.09603	-3.22205	-3.13428	-3.27834	-3.32109	-3.32191	-3.27732	-3.28825	-3.31458	-3.28764	-3.28542
hsa-let-7f-2-3p	2.43e-05	0.00023796	1.15066	-3.08291	-3.10814	-3.01235	-3.03369	-3.07446	-3.09603	-3.22205	-3.13428	-3.27834	-3.32109	-3.32191	-3.27732	-3.28825	-3.31458	-3.28764	-3.28542
hsa-let-7f-5p	0.0719058	0.0860105	0.309028	-3.08291	-3.10814	-3.01235	-3.03369	-3.07446	-3.09603	-3.22205	-3.13428	-0.536773	0.0787163	-1.61201	-0.859996	-3.28825	-3.31458	-3.28764	-3.28542
hsa-let-7g-3p	2.43e-05	0.00023796	1.15066	-3.08291	-3.10814	-3.01235	-3.03369	-3.07446	-3.09603	-3.22205	-3.13428	-3.27834	-3.32109	-3.32191	-3.27732	-3.28825	-3.31458	-3.28764	-3.28542
hsa-let-7g-5p	0.0764672	0.0860105	0.368247	-3.08291	-3.10814	-3.01235	-3.03369	-3.07446	-3.09603	-3.22205	-3.13428	-0.820963	-0.649337	-1.91786	-0.582683	-3.28825	-3.31458	-3.28764	-3.28542
hsa-let-7i-3p	2.43e-05	0.00023796	1.15066	-3.08291	-3.10814	-3.01235	-3.03369	-3.07446	-3.09603	-3.22205	-3.13428	-3.27834	-3.32109	-3.32191	-3.27732	-3.28825	-3.31458	-3.28764	-3.28542
hsa-let-7i-5p	0.0662601	0.0860105	0.331193	-3.08291	-3.10814	-3.01235	-3.03369	-3.07446	-3.09603	-3.22205	-3.13428	-0.980708	-0.106771	-0.950789	-1.09583	-3.28825	-3.31458	-3.28764	-3.28542
hsa-miR-1	2.43e-05	0.00023796	1.15066	-3.08291	-3.10814	-3.01235	-3.03369	-3.07446	-3.09603	-3.22205	-3.13428	-3.27834	-3.32109	-3.32191	-3.27732	-3.28825	-3.31458	-3.28764	-3.28542
hsa-miR-100-3p	2.43e-05	0.00023796	1.15066	-3.08291	-3.10814	-3.01235	-3.03369	-3.07446	-3.09603	-3.22205	-3.13428	-3.27834	-3.32109	-3.32191	-3.27732	-3.28825	-3.31458	-3.28764	-3.28542
hsa-miR-100-5p	2.43e-05	0.00023796	1.15066	-3.08291	-3.10814	-3.01235	-3.03369	-3.07446	-3.09603	-3.22205	-3.13428	-3.27834	-3.32109	-3.32191	-3.27732	-3.28825	-3.31458	-3.28764	-3.28542
hsa-miR-101-3p	0.177939	0.215578	0.372359	-3.08291	-3.10814	-3.01235	-3.03369	-3.07446	-3.09603	-3.22205	-3.13428	-3.27834	-1.09095	-1.62353	0.276023	-3.28825	-3.31458	-3.28764	-3.28542
hsa-miR-101-5p	2.43e-05	0.00023796	1.15066	-3.08291	-3.10814	-3.01235	-3.03369	-3.07446	-3.09603	-3.22205	-3.13428	-3.27834	-3.32109	-3.32191	-3.27732	-3.28825	-3.31458	-3.28764	-3.28542
hsa-miR-103a-2-5p	2.43e-05	0.00023796	1.15066	-3.08291	-3.10814	-3.01235	-3.03369	-3.07446	-3.09603	-3.22205	-3.13428	-3.27834	-3.32109	-3.32191	-3.27732	-3.28825	-3.31458	-3.28764	-3.28542
hsa-miR-103a-3p	0.186023	0.217851	0.475001	-3.08291	-3.10814	-3.01235	-3.03369	-3.07446	-3.09603	-3.22205	-3.13428	-0.481298	-1.07057	-1.89603	-3.27732	-3.28825	-3.31458	-3.28764	-3.28542
hsa-miR-103b	2.43e-05	0.00023796	1.15066	-3.08291	-3.10814	-3.01235	-3.03369	-3.07446	-3.09603	-3.22205	-3.13428	-3.27834	-3.32109	-3.32191	-3.27732	-3.28825	-3.31458	-3.28764	-3.28542
hsa-miR-105-3p	2.43e-05	0.00023796	1.15066	-3.08291	-3.10814	-3.01235	-3.03369	-3.07446	-3.09603	-3.22205	-3.13428	-3.27834	-3.32109	-3.32191	-3.27732	-3.28825	-3.31458	-3.28764	-3.28542
hsa-miR-105-5p	2.43e-05	0.00023796	1.15066	-3.08291	-3.10814	-3.01235	-3.03369	-3.07446	-3.09603	-3.22205	-3.13428	-3.27834	-3.32109	-3.32191	-3.27732	-3.28825	-3.31458	-3.28764	-3.28542
hsa-miR-106a-3p	2.43e-05	0.00023796	1.15066	-3.08291	-3.10814	-3.01235	-3.03369	-3.07446	-3.09603	-3.22205	-3.13428	-3.27834	-3.32109	-3.32191	-3.27732	-3.28825	-3.31458	-3.28764	-3.28542
hsa-miR-106b-3p	2.43e-05	0.00023796	1.15066	-3.08291	-3.10814	-3.01235	-3.03369	-3.07446	-3.09603	-3.22205	-3.13428	-3.27834	-3.32109	-3.32191	-3.27732	-3.28825	-3.31458	-3.28764	-3.28542
hsa-miR-106b-5p	0.0651955	0.0860105	0.209349	-3.08291	-3.10814	-3.01235	-3.03369	-3.07446	-3.09603	-3.22205	-3.13428	-0.636215	-0.559837	-0.675948	1.08346	-3.28825	-3.31458	-3.28764	-3.28542
hsa-miR-107	0.0607951	0.0860105	0.326544	-3.08291	-3.10814	-3.01235	-3.03369	-3.07446	-3.09603	-3.22205	-3.13428	-0.599926	-0.771228	-0.913735	-0.547165	-3.28825	-3.31458	-3.28764	-3.28542
hsa-miR-10a-3p	2.43e-05	0.00023796	1.15066	-3.08291	-3.10814	-3.01235	-3.03369	-3.07446	-3.09603	-3.22205	-3.13428	-3.27834	-3.32109	-3.32191	-3.27732	-3.28825	-3.31458	-3.28764	-3.28542
hsa-miR-10a-5p	2.43e-05	0.00023796	1.15066	-3.08291	-3.10814	-3.01235	-3.03369	-3.07446	-3.09603	-3.22205	-3.13428	-3.27834	-3.32109	-3.32191	-3.27732	-3.28825	-3.31458	-3.28764	-3.28542
hsa-miR-10b-3p	2.43e-05	0.00023796	1.15066	-3.08291	-3.10814	-3.01235	-3.03369	-3.07446	-3.09603	-3.22205	-3.13428	-3.27834	-3.32109	-3.32191	-3.27732	-3.28825	-3.31458	-3.28764	-3.28542
hsa-miR-10b-5p	2.43e-05	0.00023796	1.15066	-3.08291	-3.10814	-3.01235	-3.03369	-3.07446	-3.09603	-3.22205	-3.13428	-3.27834	-3.32109	-3.32191	-3.27732	-3.28825	-3.31458	-3.28764	-3.28542
hsa-miR-1178-3p	2.43e-05	0.00023796	1.15066	-3.08291	-3.10814	-3.01235	-3.03369	-3.07446	-3.09603	-3.22205	-3.13428	-3.27834	-3.32109	-3.32191	-3.27732	-3.28825	-3.31458	-3.28764	-3.28542
hsa-miR-1178-5p	2.43e-05	0.00023796	1.15066	-3.08291	-3.10814	-3.01235	-3.03369	-3.07446	-3.09603	-3.22205	-3.13428	-3.27834	-3.32109	-3.32191	-3.27732	-3.28825	-3.31458	-3.28764	-3.28542
hsa-miR-1179	2.43e-05	0.00023796	1.15066	-3.08291	-3.10814	-3.01235	-3.03369	-3.07446	-3.09603	-3.22205	-3.13428	-3.27834	-3.32109	-3.32191	-3.27732	-3.28825	-3.31458	-3.28764	-3.28542
hsa-miR-1180	2.43e-05	0.00023796	1.15066	-3.08291	-3.10814	-3.01235	-3.03369	-3.07446	-3.09603	-3.22205	-3.13428	-3.27834	-3.32109	-3.32191	-3.27732	-3.28825	-3.31458	-3.28764	-3.28542
hsa-miR-1181	0.451527	0.780477	0.404859	-3.08291	-3.10814	-3.01235	-3.03369	-3.07446	-3.09603	-3.22205	-3.13428	-3.27834	-2.5614	0.613855	-3.27732	-3.28825	-3.31458	-3.28764	-3.28542
hsa-miR-1182	2.43e-05	0.00023796	1.15066	-3.08291	-3.10814	-3.01235	-3.03369	-3.07446	-3.09603	-3.22205	-3.13428	-3.27834	-3.32109	-3.32191	-3.27732	-3.28825	-3.31458	-3.28764	-3.28542
hsa-miR-1183	0.317786	0.365945	1.05723	-3.08291	-3.10814	-3.01235	-3.03369	-3.07446	-3.09603	-3.22205	-3.13428	-3.27834	-2.5395	-3.32191	-3.27732	-3.28825	-3.31458	-3.28764	-3.28542
hsa-miR-1184	2.43e-05	0.00023796	1.15066	-3.08291	-3.10814	-3.01235	-3.03369	-3.07446	-3.09603	-3.22205	-3.13428	-3.27834	-3.32109	-3.32191	-3.27732	-3.28825	-3.31458	-3.28764	-3.28542
hsa-miR-1185-1-3p	0.0331576	0.0375984	0.247519	-3.08291	-3.10814	-3.01235	-3.03369	-3.07446	-3.09603	-3.22205	-3.13428	-3.27834	-2.88664	-2.90116	-3.27732	-0.500397	-0.155896	-0.260423	-0.200924
hsa-miR-1185-2-3p	0.172858	0.214959	0.481675	-3.08291	-3.10814	-3.01235	-3.03369	-3.07446	-3.09603	-3.22205	-3.13428	-3.27834	-3.32109	-3.32191	-3.27732	-1.5766	-0.855729	-3.28764	-0.867033
hsa-miR-1185-5p	2.43e-05	0.00023796	1.15066	-3.08291	-3.10814	-3.01235	-3.03369	-3.07446	-3.09603	-3.22205	-3.13428	-3.27834	-3.32109	-3.32191	-3.27732	-3.28825	-3.31458	-3.28764	-3.28542
hsa-miR-1193	2.43e-05	0.00023796	1.15066	-3.08291	-3.10814	-3.01235	-3.03369	-3.07446	-3.09603	-3.22205	-3.13428	-3.27834	-3.32109	-3.32191	-3.27732	-3.28825	-3.31458	-3.28764	-3.28542
hsa-miR-1197	2.43e-05	0.00023796	1.15066	-3.08291	-3.10814	-3.01235	-3.03369	-3.07446	-3.09603	-3.22205	-3.13428	-3.27834	-3.32109	-3.32191	-3.27732	-3.28825	-3.31458	-3.28764	-3.28542
hsa-miR-1200	2.43e-05	0.00023796	1.15066	-3.08291	-3.10814	-3.01235	-3.03369	-3.07446	-3.09603	-3.22205	-3.13428	-3.27834	-3.32109	-3.32191	-3.27732	-3.28825	-3.31458	-3.28764	-3.28542
hsa-miR-1202	0.0433079	0.0447958	0.447001	-3.08291	-3.10814	-3.01235	-3.03369	4.66501	3.60188	4.16951	3.87116	3.07327	4.2657	4.0874	1.05464	5.02553	3.56217	5.02553	5.10015
hsa-miR-1203	2.43e-05	0.00023796	1.15066	-3.08291	-3.10814	-3.01235	-3.03369	-3.07446	-3.09603	-3.22205	-3.13428	-3.27834	-3.32109	-3.32191	-3.27732	-3.28825	-3.31458	-3.28764	-3.28542
hsa-miR-1204	2.43e-05	0.00023796	1.15066	-3.08291	-3.10814	-3.01235	-3.03369	-3.07446	-3.09603	-3.22205	-3.13428	-3.27834	-3.32109	-3.32191	-3.27732	-3.28825	-3.31458	-3.28764	-3.28542
hsa-miR-1205	2.43e-05	0.00023796	1.15066	-3.08291	-3.10814	-3.01235	-3.03369	-3.07446	-3.09603	-3.22205	-3.13428	-3.27834	-3.32109	-3.32191	-3.27732	-3.28825	-3.31458	-3.28764	-3.28542
hsa-miR-1206	2.43e-05	0.00023796	1.15066	-3.08291	-3.10814	-3.01235	-3.03369	-3.07446	-3.09603	-3.22205	-3.13428	-3.27834	-3.32109	-3.32191	-3.27732	-3.28825	-3.31458	-3.28764	-3.28542
hsa-miR-1207-3p	2.43e-05	0.00023796	1.15066	-3.08291	-3.10814	-3.01235	-3.03369	-3.07446	-3.09603	-3.22205	-3.13428	-3.27834	-3.32109	-3.32191	-3.27732	-3.28825	-3.31458	-3.28764	-3.28542
hsa-miR-1207-5p	0.707745	0.749231	2.84163	3.14937	3.50579	6.603	-3.03369	4.0874	3.94615	2.94923	3.60188	1.71325	2.22739	2.47753	1.69706	3.07327	3.20967	3.41867	3.87116
hsa-miR-1208	2.43e-05	0.00023796	1.15066	-3.08291	-3.10814	-3.01235	-3.03369	-3.07446	-3.09603	-3.22205	-3.13428	-3.27834	-3.32109	-3.32191	-3.27732	-3.28825	-3.31458	-3.28764	-3.28542
hsa-miR-122-3p	2.43e-05	0.00023796	1.15066	-3.08291	-3.10814	-3.01235	-3.03369	-3.07446	-3.09603	-3.22205	-3.13428	-3.27834	-3.32109	-3.32191	-3.27732	-3.28825	-3.31458	-3.28764	-3.28542
hsa-miR-122-5p	2.43e-05	0.00023796	1.15066	-3.08291	-3.10814	-3.01235	-3.03369	-3.07446	-3.09603	-3.22205	-3.13428	-3.27834	-3.32109	-3.32191	-3.27732	-3.28825	-3.31458	-3.28764	-3.28542
hsa-miR-1224-3p	2.43e-05	0.00023796	1.15066	-3.08291	-3.10814	-3.01235	-3.03369	-3.07446	-3.09603	-3.22205	-3.13428	-3.27834	-3.32109	-3.32191	-3.27732	-3.28825	-3.31458	-3.28764	-3.28542
hsa-miR-1224-5p	0.010025	0.00740819	0.300897	-3.08291	-3.10814	-3.01235	-3.03369	-3.07446	-3.09603	-3.22205	-3.13428	-3.27834	-2.37075	-1.58227	-3.27732	-0.839665	-0.725495	-0.649337	-0.78939
hsa-miR-1225-3p	0.298544	0.121986	8.30651	2.70544	-3.10814	-3.01235	-3.03369	-3.07446	-3.09603	-3.22205	-3.13428	-3.27834	-2.90307	-2.87759	-3.27732	-3.28825	-3.31458	-3.28764	-3.28542
hsa-miR-1225-5p	0.34794	0.336052	1.07869	-3.08291	3.56217	-3.01235	-3.03369	3.94615	3.41867	4.66501	4.0874	0.665169	1.71325	2.86355	1.1931	3.60188	3.02036	3.56217	4.82129
hsa-miR-1226-3p	2.43e-05	0.00023796	1.15066	-3.08291	-3.10814	-3.01235	-3.03369	-3.07446	-3.09603	-3.22205	-3.13428	-3.27834	-3.32109	-3.32191	-3.27732	-3.28825	-3.31458	-3.28764	-3.28542
hsa-miR-1226-5p	2.43e-05	0.00023796	1.15066	-3.08291	-3.10814	-3.01235	-3.03369	-3.07446	-3.09603	-3.22205	-3.13428	-3.27834	-3.32109	-3.32191	-3.27732	-3.28825	-3.31458	-3.28764	-3.28542
hsa-miR-1227-3p	2.43e-05	0.00023796	1.15066	-3.08291	-3.10814	-3.01235	-3.03369	-3.07446	-3.09603	-3.22205	-3.13428	-3.27834	-3.32109	-3.32191	-3.27732	-3.28825	-3.31458	-3.28764	-3.28542
hsa-miR-1227-5p	0.000580011	0.00141517	0.106884	-3.08291	-3.10814	-3.01235	-3.03369	-3.07446	-3.09603	-3.22205	-3.13428	1.0139	-0.135097	-0.883827	-3.27732	-0.231738	0.456188	0.582132	0.554514
hsa-miR-1228-3p	0.0481705	0.0363087	29.5241	4.16951	3.41867	5.53619	5.69761	3.50579	-3.09603	0.217976	-3.13428	0.160329	-2.4286	-2.41278	0.00774522	-0.820963	-1.63667	-0.536773	-0.599926
hsa-miR-1228-5p	2.43e-05	0.00023796	1.15066	-3.08291	-3.10814	-3.01235	-3.03369	-3.07446	-3.09603	-3.22205	-3.13428	-3.27834	-3.32109	-3.32191	-3.27732	-3.28825	-3.31458	-3.28764	-3.28542
hsa-miR-1229-3p	2.43e-05	0.00023796	1.15066	-3.08291	-3.10814	-3.01235	-3.03369	-3.07446	-3.09603	-3.22205	-3.13428	-3.27834	-3.32109	-3.32191	-3.27732	-3.28825	-3.31458	-3.28764	-3.28542
hsa-miR-1229-5p	0.0105046	0.0108184	0.406596	-3.08291	-3.10814	-3.01235	-3.03369	-3.07446	-3.09603	2.22739	2.47753	0.383673	0.402063	0.582132	-0.121499	2.8269	2.56957	2.07663	2.22739
hsa-miR-1231	2.43e-05	0.00023796	1.15066	-3.08291	-3.10814	-3.01235	-3.03369	-3.07446	-3.09603	-3.22205	-3.13428	-3.27834	-3.32109	-3.32191	-3.27732	-3.28825	-3.31458	-3.28764	-3.28542
hsa-miR-1233-1-5p	2.43e-05	0.00023796	1.15066	-3.08291	-3.10814	-3.01235	-3.03369	-3.07446	-3.09603	-3.22205	-3.13428	-3.27834	-3.32109	-3.32191	-3.27732	-3.28825	-3.31458	-3.28764	-3.28542
hsa-miR-1234-3p	0.0180252	0.0147871	44.1901	4.0874	3.02036	5.80537	5.30778	3.07327	-3.09603	0.204696	-3.13428	-0.0733799	-2.90307	-2.88417	-0.559837	-3.28825	-3.31458	-0.913735	-1.64242
hsa-miR-1234-5p	0.394477	0.447392	1.06746	5.02553	4.35597	-3.01235	-3.03369	5.80537	5.10015	6.0381	5.53619	3.02036	3.50579	4.2657	3.20967	5.69761	5.10015	5.30778	6.0381
hsa-miR-1236-3p	2.43e-05	0.00023796	1.15066	-3.08291	-3.10814	-3.01235	-3.03369	-3.07446	-3.09603	-3.22205	-3.13428	-3.27834	-3.32109	-3.32191	-3.27732	-3.28825	-3.31458	-3.28764	-3.28542
hsa-miR-1236-5p	0.323152	0.477976	0.447565	-3.08291	-3.10814	-3.01235	-3.03369	-3.07446	-3.09603	-3.22205	-3.13428	-3.27834	-3.32109	0.0300821	-3.27732	-3.28825	-1.12546	-3.28764	-3.28542
hsa-miR-1237-3p	2.43e-05	0.00023796	1.15066	-3.08291	-3.10814	-3.01235	-3.03369	-3.07446	-3.09603	-3.22205	-3.13428	-3.27834	-3.32109	-3.32191	-3.27732	-3.28825	-3.31458	-3.28764	-3.28542
hsa-miR-1237-5p	2.43e-05	0.00023796	1.15066	-3.08291	-3.10814	-3.01235	-3.03369	-3.07446	-3.09603	-3.22205	-3.13428	-3.27834	-3.32109	-3.32191	-3.27732	-3.28825	-3.31458	-3.28764	-3.28542
hsa-miR-1238-3p	0.116844	0.098013	24.7295	3.07327	2.8269	4.98395	-3.03369	2.8269	-3.09603	-3.22205	-3.13428	-0.950789	-3.32109	-2.83384	-0.855729	-3.28825	-2.61018	-1.62353	-1.68241
hsa-miR-1238-5p	2.43e-05	0.00023796	1.15066	-3.08291	-3.10814	-3.01235	-3.03369	-3.07446	-3.09603	-3.22205	-3.13428	-3.27834	-3.32109	-3.32191	-3.27732	-3.28825	-3.31458	-3.28764	-3.28542
hsa-miR-124-3p	0.572274	0.605935	1.02458	-3.08291	-3.10814	-3.01235	-3.03369	-3.07446	-3.09603	-3.22205	-3.13428	-3.27834	-2.60828	-2.87566	-3.27732	-3.28825	-3.31458	-3.28764	-3.28542
hsa-miR-124-5p	2.43e-05	0.00023796	1.15066	-3.08291	-3.10814	-3.01235	-3.03369	-3.07446	-3.09603	-3.22205	-3.13428	-3.27834	-3.32109	-3.32191	-3.27732	-3.28825	-3.31458	-3.28764	-3.28542
hsa-miR-1243	2.43e-05	0.00023796	1.15066	-3.08291	-3.10814	-3.01235	-3.03369	-3.07446	-3.09603	-3.22205	-3.13428	-3.27834	-3.32109	-3.32191	-3.27732	-3.28825	-3.31458	-3.28764	-3.28542
hsa-miR-1244	2.43e-05	0.00023796	1.15066	-3.08291	-3.10814	-3.01235	-3.03369	-3.07446	-3.09603	-3.22205	-3.13428	-3.27834	-3.32109	-3.32191	-3.27732	-3.28825	-3.31458	-3.28764	-3.28542
hsa-miR-1245a	2.43e-05	0.00023796	1.15066	-3.08291	-3.10814	-3.01235	-3.03369	-3.07446	-3.09603	-3.22205	-3.13428	-3.27834	-3.32109	-3.32191	-3.27732	-3.28825	-3.31458	-3.28764	-3.28542
hsa-miR-1245b-3p	2.43e-05	0.00023796	1.15066	-3.08291	-3.10814	-3.01235	-3.03369	-3.07446	-3.09603	-3.22205	-3.13428	-3.27834	-3.32109	-3.32191	-3.27732	-3.28825	-3.31458	-3.28764	-3.28542
hsa-miR-1245b-5p	2.43e-05	0.00023796	1.15066	-3.08291	-3.10814	-3.01235	-3.03369	-3.07446	-3.09603	-3.22205	-3.13428	-3.27834	-3.32109	-3.32191	-3.27732	-3.28825	-3.31458	-3.28764	-3.28542
hsa-miR-1246	0.00649802	0.00991471	0.123385	-3.08291	6.25201	-3.01235	5.53619	-3.07446	-3.09603	-3.22205	2.22739	6.603	8.50142	8.50142	7.29293	3.20967	4.35597	4.66501	1.36687
hsa-miR-1247-3p	2.43e-05	0.00023796	1.15066	-3.08291	-3.10814	-3.01235	-3.03369	-3.07446	-3.09603	-3.22205	-3.13428	-3.27834	-3.32109	-3.32191	-3.27732	-3.28825	-3.31458	-3.28764	-3.28542
hsa-miR-1247-5p	2.43e-05	0.00023796	1.15066	-3.08291	-3.10814	-3.01235	-3.03369	-3.07446	-3.09603	-3.22205	-3.13428	-3.27834	-3.32109	-3.32191	-3.27732	-3.28825	-3.31458	-3.28764	-3.28542
hsa-miR-1248	2.43e-05	0.00023796	1.15066	-3.08291	-3.10814	-3.01235	-3.03369	-3.07446	-3.09603	-3.22205	-3.13428	-3.27834	-3.32109	-3.32191	-3.27732	-3.28825	-3.31458	-3.28764	-3.28542
hsa-miR-1249	0.114207	0.0990483	0.474594	-3.08291	-3.10814	-3.01235	-3.03369	-3.07446	-3.09603	-3.22205	-3.13428	-3.27834	-3.32109	-3.32191	-3.27732	-1.90297	-2.40044	-0.930061	-0.771228
hsa-miR-1250	2.43e-05	0.00023796	1.15066	-3.08291	-3.10814	-3.01235	-3.03369	-3.07446	-3.09603	-3.22205	-3.13428	-3.27834	-3.32109	-3.32191	-3.27732	-3.28825	-3.31458	-3.28764	-3.28542
hsa-miR-1251	2.43e-05	0.00023796	1.15066	-3.08291	-3.10814	-3.01235	-3.03369	-3.07446	-3.09603	-3.22205	-3.13428	-3.27834	-3.32109	-3.32191	-3.27732	-3.28825	-3.31458	-3.28764	-3.28542
hsa-miR-1252	2.43e-05	0.00023796	1.15066	-3.08291	-3.10814	-3.01235	-3.03369	-3.07446	-3.09603	-3.22205	-3.13428	-3.27834	-3.32109	-3.32191	-3.27732	-3.28825	-3.31458	-3.28764	-3.28542
hsa-miR-1253	2.43e-05	0.00023796	1.15066	-3.08291	-3.10814	-3.01235	-3.03369	-3.07446	-3.09603	-3.22205	-3.13428	-3.27834	-3.32109	-3.32191	-3.27732	-3.28825	-3.31458	-3.28764	-3.28542
hsa-miR-1254	2.43e-05	0.00023796	1.15066	-3.08291	-3.10814	-3.01235	-3.03369	-3.07446	-3.09603	-3.22205	-3.13428	-3.27834	-3.32109	-3.32191	-3.27732	-3.28825	-3.31458	-3.28764	-3.28542
hsa-miR-1255a	2.43e-05	0.00023796	1.15066	-3.08291	-3.10814	-3.01235	-3.03369	-3.07446	-3.09603	-3.22205	-3.13428	-3.27834	-3.32109	-3.32191	-3.27732	-3.28825	-3.31458	-3.28764	-3.28542
hsa-miR-1255b-2-3p	2.43e-05	0.00023796	1.15066	-3.08291	-3.10814	-3.01235	-3.03369	-3.07446	-3.09603	-3.22205	-3.13428	-3.27834	-3.32109	-3.32191	-3.27732	-3.28825	-3.31458	-3.28764	-3.28542
hsa-miR-1255b-5p	2.43e-05	0.00023796	1.15066	-3.08291	-3.10814	-3.01235	-3.03369	-3.07446	-3.09603	-3.22205	-3.13428	-3.27834	-3.32109	-3.32191	-3.27732	-3.28825	-3.31458	-3.28764	-3.28542
hsa-miR-1256	2.43e-05	0.00023796	1.15066	-3.08291	-3.10814	-3.01235	-3.03369	-3.07446	-3.09603	-3.22205	-3.13428	-3.27834	-3.32109	-3.32191	-3.27732	-3.28825	-3.31458	-3.28764	-3.28542
hsa-miR-1257	2.43e-05	0.00023796	1.15066	-3.08291	-3.10814	-3.01235	-3.03369	-3.07446	-3.09603	-3.22205	-3.13428	-3.27834	-3.32109	-3.32191	-3.27732	-3.28825	-3.31458	-3.28764	-3.28542
hsa-miR-1258	2.43e-05	0.00023796	1.15066	-3.08291	-3.10814	-3.01235	-3.03369	-3.07446	-3.09603	-3.22205	-3.13428	-3.27834	-3.32109	-3.32191	-3.27732	-3.28825	-3.31458	-3.28764	-3.28542
hsa-miR-125a-3p	0.340222	0.484113	0.541167	-3.08291	-3.10814	-3.01235	-3.03369	-3.07446	-3.09603	-3.22205	-3.13428	-3.27834	-3.32109	-3.32191	-3.27732	-3.28825	-0.675948	-3.28764	-1.01727
hsa-miR-125a-5p	2.43e-05	0.00023796	1.15066	-3.08291	-3.10814	-3.01235	-3.03369	-3.07446	-3.09603	-3.22205	-3.13428	-3.27834	-3.32109	-3.32191	-3.27732	-3.28825	-3.31458	-3.28764	-3.28542
hsa-miR-125b-1-3p	2.43e-05	0.00023796	1.15066	-3.08291	-3.10814	-3.01235	-3.03369	-3.07446	-3.09603	-3.22205	-3.13428	-3.27834	-3.32109	-3.32191	-3.27732	-3.28825	-3.31458	-3.28764	-3.28542
hsa-miR-125b-2-3p	2.43e-05	0.00023796	1.15066	-3.08291	-3.10814	-3.01235	-3.03369	-3.07446	-3.09603	-3.22205	-3.13428	-3.27834	-3.32109	-3.32191	-3.27732	-3.28825	-3.31458	-3.28764	-3.28542
hsa-miR-125b-5p	0.146031	0.137588	0.528143	-3.08291	-3.10814	-3.01235	-3.03369	-3.07446	-3.09603	-3.22205	-3.13428	-1.13343	-2.40615	-2.53042	-0.867033	-3.28825	-3.31458	-3.28764	-3.28542
hsa-miR-126-3p	2.43e-05	0.00023796	1.15066	-3.08291	-3.10814	-3.01235	-3.03369	-3.07446	-3.09603	-3.22205	-3.13428	-3.27834	-3.32109	-3.32191	-3.27732	-3.28825	-3.31458	-3.28764	-3.28542
hsa-miR-126-5p	2.43e-05	0.00023796	1.15066	-3.08291	-3.10814	-3.01235	-3.03369	-3.07446	-3.09603	-3.22205	-3.13428	-3.27834	-3.32109	-3.32191	-3.27732	-3.28825	-3.31458	-3.28764	-3.28542
hsa-miR-1260a	0.0306465	0.0306913	0.243019	-3.08291	-3.10814	-3.01235	-3.03369	-3.07446	-3.09603	-3.22205	-3.13428	-0.135097	-0.897512	-1.90297	0.358231	-3.28825	-3.31458	-0.855729	-3.28542
hsa-miR-1260b	0.57937	0.84048	0.753457	-3.08291	-3.10814	-3.01235	-3.03369	-3.07446	-3.09603	-3.22205	-3.13428	-3.27834	-2.60375	-3.32191	-1.09583	-3.28825	-3.31458	-3.28764	-3.28542
hsa-miR-1261	2.43e-05	0.00023796	1.15066	-3.08291	-3.10814	-3.01235	-3.03369	-3.07446	-3.09603	-3.22205	-3.13428	-3.27834	-3.32109	-3.32191	-3.27732	-3.28825	-3.31458	-3.28764	-3.28542
hsa-miR-1262	2.43e-05	0.00023796	1.15066	-3.08291	-3.10814	-3.01235	-3.03369	-3.07446	-3.09603	-3.22205	-3.13428	-3.27834	-3.32109	-3.32191	-3.27732	-3.28825	-3.31458	-3.28764	-3.28542
hsa-miR-1263	2.43e-05	0.00023796	1.15066	-3.08291	-3.10814	-3.01235	-3.03369	-3.07446	-3.09603	-3.22205	-3.13428	-3.27834	-3.32109	-3.32191	-3.27732	-3.28825	-3.31458	-3.28764	-3.28542
hsa-miR-1264	2.43e-05	0.00023796	1.15066	-3.08291	-3.10814	-3.01235	-3.03369	-3.07446	-3.09603	-3.22205	-3.13428	-3.27834	-3.32109	-3.32191	-3.27732	-3.28825	-3.31458	-3.28764	-3.28542
hsa-miR-1265	2.43e-05	0.00023796	1.15066	-3.08291	-3.10814	-3.01235	-3.03369	-3.07446	-3.09603	-3.22205	-3.13428	-3.27834	-3.32109	-3.32191	-3.27732	-3.28825	-3.31458	-3.28764	-3.28542
hsa-miR-1266	2.43e-05	0.00023796	1.15066	-3.08291	-3.10814	-3.01235	-3.03369	-3.07446	-3.09603	-3.22205	-3.13428	-3.27834	-3.32109	-3.32191	-3.27732	-3.28825	-3.31458	-3.28764	-3.28542
hsa-miR-1267	2.43e-05	0.00023796	1.15066	-3.08291	-3.10814	-3.01235	-3.03369	-3.07446	-3.09603	-3.22205	-3.13428	-3.27834	-3.32109	-3.32191	-3.27732	-3.28825	-3.31458	-3.28764	-3.28542
hsa-miR-1268a	0.085884	0.0896588	0.385717	3.41867	5.02553	-3.01235	-3.03369	3.23318	3.23318	1.32389	3.02036	1.05464	4.16951	3.50579	3.50579	3.41867	4.16951	6.0381	5.69761
hsa-miR-1268b	0.0332761	0.0370208	0.708699	-3.08291	1.69625	-3.01235	-3.03369	-3.07446	-3.09603	3.23318	-3.13428	0.204696	1.22605	3.07327	-0.510604	1.22605	0.373177	0.53678	0.204696
hsa-miR-1269a	2.43e-05	0.00023796	1.15066	-3.08291	-3.10814	-3.01235	-3.03369	-3.07446	-3.09603	-3.22205	-3.13428	-3.27834	-3.32109	-3.32191	-3.27732	-3.28825	-3.31458	-3.28764	-3.28542
hsa-miR-1269b	2.43e-05	0.00023796	1.15066	-3.08291	-3.10814	-3.01235	-3.03369	-3.07446	-3.09603	-3.22205	-3.13428	-3.27834	-3.32109	-3.32191	-3.27732	-3.28825	-3.31458	-3.28764	-3.28542
hsa-miR-127-3p	2.43e-05	0.00023796	1.15066	-3.08291	-3.10814	-3.01235	-3.03369	-3.07446	-3.09603	-3.22205	-3.13428	-3.27834	-3.32109	-3.32191	-3.27732	-3.28825	-3.31458	-3.28764	-3.28542
hsa-miR-127-5p	2.43e-05	0.00023796	1.15066	-3.08291	-3.10814	-3.01235	-3.03369	-3.07446	-3.09603	-3.22205	-3.13428	-3.27834	-3.32109	-3.32191	-3.27732	-3.28825	-3.31458	-3.28764	-3.28542
hsa-miR-1270	2.43e-05	0.00023796	1.15066	-3.08291	-3.10814	-3.01235	-3.03369	-3.07446	-3.09603	-3.22205	-3.13428	-3.27834	-3.32109	-3.32191	-3.27732	-3.28825	-3.31458	-3.28764	-3.28542
hsa-miR-1271-3p	2.43e-05	0.00023796	1.15066	-3.08291	-3.10814	-3.01235	-3.03369	-3.07446	-3.09603	-3.22205	-3.13428	-3.27834	-3.32109	-3.32191	-3.27732	-3.28825	-3.31458	-3.28764	-3.28542
hsa-miR-1271-5p	2.43e-05	0.00023796	1.15066	-3.08291	-3.10814	-3.01235	-3.03369	-3.07446	-3.09603	-3.22205	-3.13428	-3.27834	-3.32109	-3.32191	-3.27732	-3.28825	-3.31458	-3.28764	-3.28542
hsa-miR-1272	2.43e-05	0.00023796	1.15066	-3.08291	-3.10814	-3.01235	-3.03369	-3.07446	-3.09603	-3.22205	-3.13428	-3.27834	-3.32109	-3.32191	-3.27732	-3.28825	-3.31458	-3.28764	-3.28542
hsa-miR-1273a	2.43e-05	0.00023796	1.15066	-3.08291	-3.10814	-3.01235	-3.03369	-3.07446	-3.09603	-3.22205	-3.13428	-3.27834	-3.32109	-3.32191	-3.27732	-3.28825	-3.31458	-3.28764	-3.28542
hsa-miR-1273c	2.43e-05	0.00023796	1.15066	-3.08291	-3.10814	-3.01235	-3.03369	-3.07446	-3.09603	-3.22205	-3.13428	-3.27834	-3.32109	-3.32191	-3.27732	-3.28825	-3.31458	-3.28764	-3.28542
hsa-miR-1273d	2.43e-05	0.00023796	1.15066	-3.08291	-3.10814	-3.01235	-3.03369	-3.07446	-3.09603	-3.22205	-3.13428	-3.27834	-3.32109	-3.32191	-3.27732	-3.28825	-3.31458	-3.28764	-3.28542
hsa-miR-1273e	2.43e-05	0.00023796	1.15066	-3.08291	-3.10814	-3.01235	-3.03369	-3.07446	-3.09603	-3.22205	-3.13428	-3.27834	-3.32109	-3.32191	-3.27732	-3.28825	-3.31458	-3.28764	-3.28542
hsa-miR-1273f	0.00899175	0.00146981	0.211317	-3.08291	-3.10814	-3.01235	-3.03369	-3.07446	-3.09603	-3.22205	-3.13428	-3.27834	-2.36334	-2.56906	0.613855	-0.883827	-0.582683	-1.91786	-0.0552746
hsa-miR-1273g-3p	2.29e-05	0.00041569	0.0543804	-3.08291	-3.10814	-3.01235	-3.03369	-3.07446	-3.09603	-0.121499	-3.13428	2.54588	0.690492	1.26137	4.0874	-0.215514	0.358231	0.709997	0.613855
hsa-miR-1273g-5p	2.43e-05	0.00023796	1.15066	-3.08291	-3.10814	-3.01235	-3.03369	-3.07446	-3.09603	-3.22205	-3.13428	-3.27834	-3.32109	-3.32191	-3.27732	-3.28825	-3.31458	-3.28764	-3.28542
hsa-miR-1275	0.0242352	0.0397267	0.297698	-3.08291	-3.10814	-3.01235	-3.03369	-3.07446	-3.09603	0.276023	-3.13428	-3.27834	-1.11382	-0.859996	-3.27732	0.442089	0.613855	0.373177	0.53678
hsa-miR-1276	2.43e-05	0.00023796	1.15066	-3.08291	-3.10814	-3.01235	-3.03369	-3.07446	-3.09603	-3.22205	-3.13428	-3.27834	-3.32109	-3.32191	-3.27732	-3.28825	-3.31458	-3.28764	-3.28542
hsa-miR-1277-3p	2.43e-05	0.00023796	1.15066	-3.08291	-3.10814	-3.01235	-3.03369	-3.07446	-3.09603	-3.22205	-3.13428	-3.27834	-3.32109	-3.32191	-3.27732	-3.28825	-3.31458	-3.28764	-3.28542
hsa-miR-1278	2.43e-05	0.00023796	1.15066	-3.08291	-3.10814	-3.01235	-3.03369	-3.07446	-3.09603	-3.22205	-3.13428	-3.27834	-3.32109	-3.32191	-3.27732	-3.28825	-3.31458	-3.28764	-3.28542
hsa-miR-1279	2.43e-05	0.00023796	1.15066	-3.08291	-3.10814	-3.01235	-3.03369	-3.07446	-3.09603	-3.22205	-3.13428	-3.27834	-3.32109	-3.32191	-3.27732	-3.28825	-3.31458	-3.28764	-3.28542
hsa-miR-128	2.43e-05	0.00023796	1.15066	-3.08291	-3.10814	-3.01235	-3.03369	-3.07446	-3.09603	-3.22205	-3.13428	-3.27834	-3.32109	-3.32191	-3.27732	-3.28825	-3.31458	-3.28764	-3.28542
hsa-miR-1281	0.0698707	0.003923	37.1051	3.30968	1.69625	-3.01235	4.11598	-3.07446	-3.09603	-3.22205	-3.13428	-3.27834	-3.32109	-3.01848	-3.27732	-3.28825	-3.31458	-3.28764	-3.28542
hsa-miR-1282	2.43e-05	0.00023796	1.15066	-3.08291	-3.10814	-3.01235	-3.03369	-3.07446	-3.09603	-3.22205	-3.13428	-3.27834	-3.32109	-3.32191	-3.27732	-3.28825	-3.31458	-3.28764	-3.28542
hsa-miR-1283	2.43e-05	0.00023796	1.15066	-3.08291	-3.10814	-3.01235	-3.03369	-3.07446	-3.09603	-3.22205	-3.13428	-3.27834	-3.32109	-3.32191	-3.27732	-3.28825	-3.31458	-3.28764	-3.28542
hsa-miR-1284	2.43e-05	0.00023796	1.15066	-3.08291	-3.10814	-3.01235	-3.03369	-3.07446	-3.09603	-3.22205	-3.13428	-3.27834	-3.32109	-3.32191	-3.27732	-3.28825	-3.31458	-3.28764	-3.28542
hsa-miR-1285-3p	2.43e-05	0.00023796	1.15066	-3.08291	-3.10814	-3.01235	-3.03369	-3.07446	-3.09603	-3.22205	-3.13428	-3.27834	-3.32109	-3.32191	-3.27732	-3.28825	-3.31458	-3.28764	-3.28542
hsa-miR-1285-5p	2.43e-05	0.00023796	1.15066	-3.08291	-3.10814	-3.01235	-3.03369	-3.07446	-3.09603	-3.22205	-3.13428	-3.27834	-3.32109	-3.32191	-3.27732	-3.28825	-3.31458	-3.28764	-3.28542
hsa-miR-1286	2.43e-05	0.00023796	1.15066	-3.08291	-3.10814	-3.01235	-3.03369	-3.07446	-3.09603	-3.22205	-3.13428	-3.27834	-3.32109	-3.32191	-3.27732	-3.28825	-3.31458	-3.28764	-3.28542
hsa-miR-1287	0.0834947	0.0330373	0.404905	-3.08291	-3.10814	-3.01235	-3.03369	-3.07446	-3.09603	-3.22205	-3.13428	-0.0860332	-2.41278	-2.37075	-1.03046	-3.28825	-2.37031	-3.28764	-3.28542
hsa-miR-1288	2.43e-05	0.00023796	1.15066	-3.08291	-3.10814	-3.01235	-3.03369	-3.07446	-3.09603	-3.22205	-3.13428	-3.27834	-3.32109	-3.32191	-3.27732	-3.28825	-3.31458	-3.28764	-3.28542
hsa-miR-1289	2.43e-05	0.00023796	1.15066	-3.08291	-3.10814	-3.01235	-3.03369	-3.07446	-3.09603	-3.22205	-3.13428	-3.27834	-3.32109	-3.32191	-3.27732	-3.28825	-3.31458	-3.28764	-3.28542
hsa-miR-129-1-3p	2.43e-05	0.00023796	1.15066	-3.08291	-3.10814	-3.01235	-3.03369	-3.07446	-3.09603	-3.22205	-3.13428	-3.27834	-3.32109	-3.32191	-3.27732	-3.28825	-3.31458	-3.28764	-3.28542
hsa-miR-129-2-3p	2.43e-05	0.00023796	1.15066	-3.08291	-3.10814	-3.01235	-3.03369	-3.07446	-3.09603	-3.22205	-3.13428	-3.27834	-3.32109	-3.32191	-3.27732	-3.28825	-3.31458	-3.28764	-3.28542
hsa-miR-129-5p	2.43e-05	0.00023796	1.15066	-3.08291	-3.10814	-3.01235	-3.03369	-3.07446	-3.09603	-3.22205	-3.13428	-3.27834	-3.32109	-3.32191	-3.27732	-3.28825	-3.31458	-3.28764	-3.28542
hsa-miR-1290	0.0277578	0.032395	0.316596	-3.08291	4.82129	-3.01235	4.66501	-3.07446	-3.09603	-3.22205	-3.13428	2.11132	6.25201	5.80537	4.82129	0.582132	0.709997	1.36687	0.25626
hsa-miR-1291	2.43e-05	0.00023796	1.15066	-3.08291	-3.10814	-3.01235	-3.03369	-3.07446	-3.09603	-3.22205	-3.13428	-3.27834	-3.32109	-3.32191	-3.27732	-3.28825	-3.31458	-3.28764	-3.28542
hsa-miR-1292-3p	2.43e-05	0.00023796	1.15066	-3.08291	-3.10814	-3.01235	-3.03369	-3.07446	-3.09603	-3.22205	-3.13428	-3.27834	-3.32109	-3.32191	-3.27732	-3.28825	-3.31458	-3.28764	-3.28542
hsa-miR-1292-5p	2.43e-05	0.00023796	1.15066	-3.08291	-3.10814	-3.01235	-3.03369	-3.07446	-3.09603	-3.22205	-3.13428	-3.27834	-3.32109	-3.32191	-3.27732	-3.28825	-3.31458	-3.28764	-3.28542
hsa-miR-1293	2.43e-05	0.00023796	1.15066	-3.08291	-3.10814	-3.01235	-3.03369	-3.07446	-3.09603	-3.22205	-3.13428	-3.27834	-3.32109	-3.32191	-3.27732	-3.28825	-3.31458	-3.28764	-3.28542
hsa-miR-1294	2.43e-05	0.00023796	1.15066	-3.08291	-3.10814	-3.01235	-3.03369	-3.07446	-3.09603	-3.22205	-3.13428	-3.27834	-3.32109	-3.32191	-3.27732	-3.28825	-3.31458	-3.28764	-3.28542
hsa-miR-1295a	2.43e-05	0.00023796	1.15066	-3.08291	-3.10814	-3.01235	-3.03369	-3.07446	-3.09603	-3.22205	-3.13428	-3.27834	-3.32109	-3.32191	-3.27732	-3.28825	-3.31458	-3.28764	-3.28542
hsa-miR-1295b-3p	2.43e-05	0.00023796	1.15066	-3.08291	-3.10814	-3.01235	-3.03369	-3.07446	-3.09603	-3.22205	-3.13428	-3.27834	-3.32109	-3.32191	-3.27732	-3.28825	-3.31458	-3.28764	-3.28542
hsa-miR-1295b-5p	2.43e-05	0.00023796	1.15066	-3.08291	-3.10814	-3.01235	-3.03369	-3.07446	-3.09603	-3.22205	-3.13428	-3.27834	-3.32109	-3.32191	-3.27732	-3.28825	-3.31458	-3.28764	-3.28542
hsa-miR-1296	2.43e-05	0.00023796	1.15066	-3.08291	-3.10814	-3.01235	-3.03369	-3.07446	-3.09603	-3.22205	-3.13428	-3.27834	-3.32109	-3.32191	-3.27732	-3.28825	-3.31458	-3.28764	-3.28542
hsa-miR-1297	2.43e-05	0.00023796	1.15066	-3.08291	-3.10814	-3.01235	-3.03369	-3.07446	-3.09603	-3.22205	-3.13428	-3.27834	-3.32109	-3.32191	-3.27732	-3.28825	-3.31458	-3.28764	-3.28542
hsa-miR-1298	2.43e-05	0.00023796	1.15066	-3.08291	-3.10814	-3.01235	-3.03369	-3.07446	-3.09603	-3.22205	-3.13428	-3.27834	-3.32109	-3.32191	-3.27732	-3.28825	-3.31458	-3.28764	-3.28542
hsa-miR-1299	0.798163	1	0.80135	-3.08291	-3.10814	-3.01235	-3.03369	-3.07446	-3.09603	-3.22205	-3.13428	-3.27834	-3.32109	-1.13646	-3.27732	-3.28825	-3.31458	-3.28764	-3.28542
hsa-miR-1301	2.43e-05	0.00023796	1.15066	-3.08291	-3.10814	-3.01235	-3.03369	-3.07446	-3.09603	-3.22205	-3.13428	-3.27834	-3.32109	-3.32191	-3.27732	-3.28825	-3.31458	-3.28764	-3.28542
hsa-miR-1302	2.43e-05	0.00023796	1.15066	-3.08291	-3.10814	-3.01235	-3.03369	-3.07446	-3.09603	-3.22205	-3.13428	-3.27834	-3.32109	-3.32191	-3.27732	-3.28825	-3.31458	-3.28764	-3.28542
hsa-miR-1303	2.43e-05	0.00023796	1.15066	-3.08291	-3.10814	-3.01235	-3.03369	-3.07446	-3.09603	-3.22205	-3.13428	-3.27834	-3.32109	-3.32191	-3.27732	-3.28825	-3.31458	-3.28764	-3.28542
hsa-miR-1304-3p	0.436303	0.483123	3.48056	-3.08291	1.69625	-3.01235	-3.03369	-3.07446	-3.09603	-3.22205	-3.13428	-1.13343	-3.32109	-3.32191	-3.27732	-3.28825	-3.31458	-3.28764	-3.28542
hsa-miR-1304-5p	2.43e-05	0.00023796	1.15066	-3.08291	-3.10814	-3.01235	-3.03369	-3.07446	-3.09603	-3.22205	-3.13428	-3.27834	-3.32109	-3.32191	-3.27732	-3.28825	-3.31458	-3.28764	-3.28542
hsa-miR-1305	2.43e-05	0.00023796	1.15066	-3.08291	-3.10814	-3.01235	-3.03369	-3.07446	-3.09603	-3.22205	-3.13428	-3.27834	-3.32109	-3.32191	-3.27732	-3.28825	-3.31458	-3.28764	-3.28542
hsa-miR-1306-3p	0.28216	0.325421	1.06196	-3.08291	-3.10814	-3.01235	-3.03369	-3.07446	-3.09603	-3.22205	-3.13428	-3.27834	-3.32109	-3.32191	-3.27732	-3.28825	-2.56906	-3.28764	-3.28542
hsa-miR-1306-5p	2.43e-05	0.00023796	1.15066	-3.08291	-3.10814	-3.01235	-3.03369	-3.07446	-3.09603	-3.22205	-3.13428	-3.27834	-3.32109	-3.32191	-3.27732	-3.28825	-3.31458	-3.28764	-3.28542
hsa-miR-1307-3p	2.43e-05	0.00023796	1.15066	-3.08291	-3.10814	-3.01235	-3.03369	-3.07446	-3.09603	-3.22205	-3.13428	-3.27834	-3.32109	-3.32191	-3.27732	-3.28825	-3.31458	-3.28764	-3.28542
hsa-miR-1307-5p	2.43e-05	0.00023796	1.15066	-3.08291	-3.10814	-3.01235	-3.03369	-3.07446	-3.09603	-3.22205	-3.13428	-3.27834	-3.32109	-3.32191	-3.27732	-3.28825	-3.31458	-3.28764	-3.28542
hsa-miR-130a-3p	2.43e-05	0.00023796	1.15066	-3.08291	-3.10814	-3.01235	-3.03369	-3.07446	-3.09603	-3.22205	-3.13428	-3.27834	-3.32109	-3.32191	-3.27732	-3.28825	-3.31458	-3.28764	-3.28542
hsa-miR-130a-5p	2.43e-05	0.00023796	1.15066	-3.08291	-3.10814	-3.01235	-3.03369	-3.07446	-3.09603	-3.22205	-3.13428	-3.27834	-3.32109	-3.32191	-3.27732	-3.28825	-3.31458	-3.28764	-3.28542
hsa-miR-130b-3p	2.43e-05	0.00023796	1.15066	-3.08291	-3.10814	-3.01235	-3.03369	-3.07446	-3.09603	-3.22205	-3.13428	-3.27834	-3.32109	-3.32191	-3.27732	-3.28825	-3.31458	-3.28764	-3.28542
hsa-miR-130b-5p	2.43e-05	0.00023796	1.15066	-3.08291	-3.10814	-3.01235	-3.03369	-3.07446	-3.09603	-3.22205	-3.13428	-3.27834	-3.32109	-3.32191	-3.27732	-3.28825	-3.31458	-3.28764	-3.28542
hsa-miR-132-3p	2.43e-05	0.00023796	1.15066	-3.08291	-3.10814	-3.01235	-3.03369	-3.07446	-3.09603	-3.22205	-3.13428	-3.27834	-3.32109	-3.32191	-3.27732	-3.28825	-3.31458	-3.28764	-3.28542
hsa-miR-132-5p	2.43e-05	0.00023796	1.15066	-3.08291	-3.10814	-3.01235	-3.03369	-3.07446	-3.09603	-3.22205	-3.13428	-3.27834	-3.32109	-3.32191	-3.27732	-3.28825	-3.31458	-3.28764	-3.28542
hsa-miR-1321	2.43e-05	0.00023796	1.15066	-3.08291	-3.10814	-3.01235	-3.03369	-3.07446	-3.09603	-3.22205	-3.13428	-3.27834	-3.32109	-3.32191	-3.27732	-3.28825	-3.31458	-3.28764	-3.28542
hsa-miR-1322	2.43e-05	0.00023796	1.15066	-3.08291	-3.10814	-3.01235	-3.03369	-3.07446	-3.09603	-3.22205	-3.13428	-3.27834	-3.32109	-3.32191	-3.27732	-3.28825	-3.31458	-3.28764	-3.28542
hsa-miR-1323	2.43e-05	0.00023796	1.15066	-3.08291	-3.10814	-3.01235	-3.03369	-3.07446	-3.09603	-3.22205	-3.13428	-3.27834	-3.32109	-3.32191	-3.27732	-3.28825	-3.31458	-3.28764	-3.28542
hsa-miR-1324	2.43e-05	0.00023796	1.15066	-3.08291	-3.10814	-3.01235	-3.03369	-3.07446	-3.09603	-3.22205	-3.13428	-3.27834	-3.32109	-3.32191	-3.27732	-3.28825	-3.31458	-3.28764	-3.28542
hsa-miR-133a	2.43e-05	0.00023796	1.15066	-3.08291	-3.10814	-3.01235	-3.03369	-3.07446	-3.09603	-3.22205	-3.13428	-3.27834	-3.32109	-3.32191	-3.27732	-3.28825	-3.31458	-3.28764	-3.28542
hsa-miR-133b	2.43e-05	0.00023796	1.15066	-3.08291	-3.10814	-3.01235	-3.03369	-3.07446	-3.09603	-3.22205	-3.13428	-3.27834	-3.32109	-3.32191	-3.27732	-3.28825	-3.31458	-3.28764	-3.28542
hsa-miR-134	0.0356176	0.0307307	0.284135	-3.08291	-3.10814	-3.01235	-3.03369	-3.07446	-3.09603	-3.22205	-3.13428	-3.27834	-2.44797	-3.32191	-3.27732	-0.867033	-0.500397	-0.611199	-0.155896
hsa-miR-1343	2.43e-05	0.00023796	1.15066	-3.08291	-3.10814	-3.01235	-3.03369	-3.07446	-3.09603	-3.22205	-3.13428	-3.27834	-3.32109	-3.32191	-3.27732	-3.28825	-3.31458	-3.28764	-3.28542
hsa-miR-135a-3p	0.16208	0.116357	0.713858	-3.08291	-3.10814	-3.01235	-3.03369	-3.07446	-3.09603	-3.22205	-3.13428	-3.27834	-2.40299	-2.38125	-3.27732	-3.28825	-2.43445	-3.28764	-1.5766
hsa-miR-135a-5p	2.43e-05	0.00023796	1.15066	-3.08291	-3.10814	-3.01235	-3.03369	-3.07446	-3.09603	-3.22205	-3.13428	-3.27834	-3.32109	-3.32191	-3.27732	-3.28825	-3.31458	-3.28764	-3.28542
hsa-miR-135b-3p	2.43e-05	0.00023796	1.15066	-3.08291	-3.10814	-3.01235	-3.03369	-3.07446	-3.09603	-3.22205	-3.13428	-3.27834	-3.32109	-3.32191	-3.27732	-3.28825	-3.31458	-3.28764	-3.28542
hsa-miR-135b-5p	2.43e-05	0.00023796	1.15066	-3.08291	-3.10814	-3.01235	-3.03369	-3.07446	-3.09603	-3.22205	-3.13428	-3.27834	-3.32109	-3.32191	-3.27732	-3.28825	-3.31458	-3.28764	-3.28542
hsa-miR-136-3p	2.43e-05	0.00023796	1.15066	-3.08291	-3.10814	-3.01235	-3.03369	-3.07446	-3.09603	-3.22205	-3.13428	-3.27834	-3.32109	-3.32191	-3.27732	-3.28825	-3.31458	-3.28764	-3.28542
hsa-miR-136-5p	2.43e-05	0.00023796	1.15066	-3.08291	-3.10814	-3.01235	-3.03369	-3.07446	-3.09603	-3.22205	-3.13428	-3.27834	-3.32109	-3.32191	-3.27732	-3.28825	-3.31458	-3.28764	-3.28542
hsa-miR-137	2.43e-05	0.00023796	1.15066	-3.08291	-3.10814	-3.01235	-3.03369	-3.07446	-3.09603	-3.22205	-3.13428	-3.27834	-3.32109	-3.32191	-3.27732	-3.28825	-3.31458	-3.28764	-3.28542
hsa-miR-138-1-3p	2.43e-05	0.00023796	1.15066	-3.08291	-3.10814	-3.01235	-3.03369	-3.07446	-3.09603	-3.22205	-3.13428	-3.27834	-3.32109	-3.32191	-3.27732	-3.28825	-3.31458	-3.28764	-3.28542
hsa-miR-138-2-3p	2.43e-05	0.00023796	1.15066	-3.08291	-3.10814	-3.01235	-3.03369	-3.07446	-3.09603	-3.22205	-3.13428	-3.27834	-3.32109	-3.32191	-3.27732	-3.28825	-3.31458	-3.28764	-3.28542
hsa-miR-138-5p	2.43e-05	0.00023796	1.15066	-3.08291	-3.10814	-3.01235	-3.03369	-3.07446	-3.09603	-3.22205	-3.13428	-3.27834	-3.32109	-3.32191	-3.27732	-3.28825	-3.31458	-3.28764	-3.28542
hsa-miR-139-3p	2.43e-05	0.00023796	1.15066	-3.08291	-3.10814	-3.01235	-3.03369	-3.07446	-3.09603	-3.22205	-3.13428	-3.27834	-3.32109	-3.32191	-3.27732	-3.28825	-3.31458	-3.28764	-3.28542
hsa-miR-139-5p	2.43e-05	0.00023796	1.15066	-3.08291	-3.10814	-3.01235	-3.03369	-3.07446	-3.09603	-3.22205	-3.13428	-3.27834	-3.32109	-3.32191	-3.27732	-3.28825	-3.31458	-3.28764	-3.28542
hsa-miR-140-3p	0.36525	0.49403	0.543394	-3.08291	-3.10814	-3.01235	-3.03369	-3.07446	-3.09603	-3.22205	-3.13428	-3.27834	-2.55138	-2.6253	-0.183868	-3.28825	-3.31458	-3.28764	-3.28542
hsa-miR-140-5p	0.334054	0.389665	0.549076	-3.08291	-3.10814	-3.01235	-3.03369	-3.07446	-3.09603	-3.22205	-3.13428	-3.27834	-2.42491	-2.52201	-0.260423	-3.28825	-3.31458	-3.28764	-3.28542
hsa-miR-141-3p	0.144436	0.122613	0.266027	-3.08291	-3.10814	-3.01235	-3.03369	-3.07446	-3.09603	-3.22205	-3.13428	0.592514	-2.47311	-2.3676	0.300676	-3.28825	-3.31458	-3.28764	-3.28542
hsa-miR-141-5p	2.43e-05	0.00023796	1.15066	-3.08291	-3.10814	-3.01235	-3.03369	-3.07446	-3.09603	-3.22205	-3.13428	-3.27834	-3.32109	-3.32191	-3.27732	-3.28825	-3.31458	-3.28764	-3.28542
hsa-miR-142-3p	0.0565543	0.0860105	0.0646764	-3.08291	-3.10814	-3.01235	-3.03369	-3.07446	-3.09603	-3.22205	-3.13428	3.20967	0.276023	0.690492	0.999929	-3.28825	-3.31458	-3.28764	-3.28542
hsa-miR-142-5p	0.064026	0.0860105	0.189058	-3.08291	-3.10814	-3.01235	-3.03369	-3.07446	-3.09603	-3.22205	-3.13428	-1.05899	-0.121499	-0.135097	1.16172	-3.28825	-3.31458	-3.28764	-3.28542
hsa-miR-143-3p	2.43e-05	0.00023796	1.15066	-3.08291	-3.10814	-3.01235	-3.03369	-3.07446	-3.09603	-3.22205	-3.13428	-3.27834	-3.32109	-3.32191	-3.27732	-3.28825	-3.31458	-3.28764	-3.28542
hsa-miR-143-5p	2.43e-05	0.00023796	1.15066	-3.08291	-3.10814	-3.01235	-3.03369	-3.07446	-3.09603	-3.22205	-3.13428	-3.27834	-3.32109	-3.32191	-3.27732	-3.28825	-3.31458	-3.28764	-3.28542
hsa-miR-144-3p	2.43e-05	0.00023796	1.15066	-3.08291	-3.10814	-3.01235	-3.03369	-3.07446	-3.09603	-3.22205	-3.13428	-3.27834	-3.32109	-3.32191	-3.27732	-3.28825	-3.31458	-3.28764	-3.28542
hsa-miR-144-5p	2.43e-05	0.00023796	1.15066	-3.08291	-3.10814	-3.01235	-3.03369	-3.07446	-3.09603	-3.22205	-3.13428	-3.27834	-3.32109	-3.32191	-3.27732	-3.28825	-3.31458	-3.28764	-3.28542
hsa-miR-145-3p	2.43e-05	0.00023796	1.15066	-3.08291	-3.10814	-3.01235	-3.03369	-3.07446	-3.09603	-3.22205	-3.13428	-3.27834	-3.32109	-3.32191	-3.27732	-3.28825	-3.31458	-3.28764	-3.28542
hsa-miR-145-5p	2.43e-05	0.00023796	1.15066	-3.08291	-3.10814	-3.01235	-3.03369	-3.07446	-3.09603	-3.22205	-3.13428	-3.27834	-3.32109	-3.32191	-3.27732	-3.28825	-3.31458	-3.28764	-3.28542
hsa-miR-1468	2.43e-05	0.00023796	1.15066	-3.08291	-3.10814	-3.01235	-3.03369	-3.07446	-3.09603	-3.22205	-3.13428	-3.27834	-3.32109	-3.32191	-3.27732	-3.28825	-3.31458	-3.28764	-3.28542
hsa-miR-1469	2.43e-05	0.00023796	1.15066	-3.08291	-3.10814	-3.01235	-3.03369	-3.07446	-3.09603	-3.22205	-3.13428	-3.27834	-3.32109	-3.32191	-3.27732	-3.28825	-3.31458	-3.28764	-3.28542
hsa-miR-146a-3p	2.43e-05	0.00023796	1.15066	-3.08291	-3.10814	-3.01235	-3.03369	-3.07446	-3.09603	-3.22205	-3.13428	-3.27834	-3.32109	-3.32191	-3.27732	-3.28825	-3.31458	-3.28764	-3.28542
hsa-miR-146a-5p	2.43e-05	0.00023796	1.15066	-3.08291	-3.10814	-3.01235	-3.03369	-3.07446	-3.09603	-3.22205	-3.13428	-3.27834	-3.32109	-3.32191	-3.27732	-3.28825	-3.31458	-3.28764	-3.28542
hsa-miR-146b-3p	2.43e-05	0.00023796	1.15066	-3.08291	-3.10814	-3.01235	-3.03369	-3.07446	-3.09603	-3.22205	-3.13428	-3.27834	-3.32109	-3.32191	-3.27732	-3.28825	-3.31458	-3.28764	-3.28542
hsa-miR-146b-5p	2.43e-05	0.00023796	1.15066	-3.08291	-3.10814	-3.01235	-3.03369	-3.07446	-3.09603	-3.22205	-3.13428	-3.27834	-3.32109	-3.32191	-3.27732	-3.28825	-3.31458	-3.28764	-3.28542
hsa-miR-1470	2.43e-05	0.00023796	1.15066	-3.08291	-3.10814	-3.01235	-3.03369	-3.07446	-3.09603	-3.22205	-3.13428	-3.27834	-3.32109	-3.32191	-3.27732	-3.28825	-3.31458	-3.28764	-3.28542
hsa-miR-1471	2.43e-05	0.00023796	1.15066	-3.08291	-3.10814	-3.01235	-3.03369	-3.07446	-3.09603	-3.22205	-3.13428	-3.27834	-3.32109	-3.32191	-3.27732	-3.28825	-3.31458	-3.28764	-3.28542
hsa-miR-147a	2.43e-05	0.00023796	1.15066	-3.08291	-3.10814	-3.01235	-3.03369	-3.07446	-3.09603	-3.22205	-3.13428	-3.27834	-3.32109	-3.32191	-3.27732	-3.28825	-3.31458	-3.28764	-3.28542
hsa-miR-147b	2.43e-05	0.00023796	1.15066	-3.08291	-3.10814	-3.01235	-3.03369	-3.07446	-3.09603	-3.22205	-3.13428	-3.27834	-3.32109	-3.32191	-3.27732	-3.28825	-3.31458	-3.28764	-3.28542
hsa-miR-148a-3p	0.0625231	0.0860105	0.157258	-3.08291	-3.10814	-3.01235	-3.03369	-3.07446	-3.09603	-3.22205	-3.13428	-0.611199	-0.0860332	-0.200924	1.62399	-3.28825	-3.31458	-3.28764	-3.28542
hsa-miR-148a-5p	2.43e-05	0.00023796	1.15066	-3.08291	-3.10814	-3.01235	-3.03369	-3.07446	-3.09603	-3.22205	-3.13428	-3.27834	-3.32109	-3.32191	-3.27732	-3.28825	-3.31458	-3.28764	-3.28542
hsa-miR-148b-3p	0.155453	0.155489	1.06727	-3.08291	-3.10814	-3.01235	-3.03369	-3.07446	-3.09603	-3.22205	-3.13428	-3.27834	-2.83384	-3.01848	-3.27732	-3.28825	-3.31458	-3.28764	-3.28542
hsa-miR-148b-5p	2.43e-05	0.00023796	1.15066	-3.08291	-3.10814	-3.01235	-3.03369	-3.07446	-3.09603	-3.22205	-3.13428	-3.27834	-3.32109	-3.32191	-3.27732	-3.28825	-3.31458	-3.28764	-3.28542
hsa-miR-149-3p	2.43e-05	0.00023796	1.15066	-3.08291	-3.10814	-3.01235	-3.03369	-3.07446	-3.09603	-3.22205	-3.13428	-3.27834	-3.32109	-3.32191	-3.27732	-3.28825	-3.31458	-3.28764	-3.28542
hsa-miR-149-5p	2.43e-05	0.00023796	1.15066	-3.08291	-3.10814	-3.01235	-3.03369	-3.07446	-3.09603	-3.22205	-3.13428	-3.27834	-3.32109	-3.32191	-3.27732	-3.28825	-3.31458	-3.28764	-3.28542
hsa-miR-150-3p	0.00341346	0.0108634	0.306133	-3.08291	-3.10814	-3.01235	-3.03369	-3.07446	-3.09603	0.613855	-3.13428	-0.897512	0.00774522	0.135307	-3.27732	-0.0552746	0.442089	0.184418	0.592514
hsa-miR-150-5p	2.43e-05	0.00023796	1.15066	-3.08291	-3.10814	-3.01235	-3.03369	-3.07446	-3.09603	-3.22205	-3.13428	-3.27834	-3.32109	-3.32191	-3.27732	-3.28825	-3.31458	-3.28764	-3.28542
hsa-miR-151a-3p	2.43e-05	0.00023796	1.15066	-3.08291	-3.10814	-3.01235	-3.03369	-3.07446	-3.09603	-3.22205	-3.13428	-3.27834	-3.32109	-3.32191	-3.27732	-3.28825	-3.31458	-3.28764	-3.28542
hsa-miR-151a-5p	2.43e-05	0.00023796	1.15066	-3.08291	-3.10814	-3.01235	-3.03369	-3.07446	-3.09603	-3.22205	-3.13428	-3.27834	-3.32109	-3.32191	-3.27732	-3.28825	-3.31458	-3.28764	-3.28542
hsa-miR-151b	2.43e-05	0.00023796	1.15066	-3.08291	-3.10814	-3.01235	-3.03369	-3.07446	-3.09603	-3.22205	-3.13428	-3.27834	-3.32109	-3.32191	-3.27732	-3.28825	-3.31458	-3.28764	-3.28542
hsa-miR-152	2.43e-05	0.00023796	1.15066	-3.08291	-3.10814	-3.01235	-3.03369	-3.07446	-3.09603	-3.22205	-3.13428	-3.27834	-3.32109	-3.32191	-3.27732	-3.28825	-3.31458	-3.28764	-3.28542
hsa-miR-153	2.43e-05	0.00023796	1.15066	-3.08291	-3.10814	-3.01235	-3.03369	-3.07446	-3.09603	-3.22205	-3.13428	-3.27834	-3.32109	-3.32191	-3.27732	-3.28825	-3.31458	-3.28764	-3.28542
hsa-miR-1537	2.43e-05	0.00023796	1.15066	-3.08291	-3.10814	-3.01235	-3.03369	-3.07446	-3.09603	-3.22205	-3.13428	-3.27834	-3.32109	-3.32191	-3.27732	-3.28825	-3.31458	-3.28764	-3.28542
hsa-miR-1538	2.43e-05	0.00023796	1.15066	-3.08291	-3.10814	-3.01235	-3.03369	-3.07446	-3.09603	-3.22205	-3.13428	-3.27834	-3.32109	-3.32191	-3.27732	-3.28825	-3.31458	-3.28764	-3.28542
hsa-miR-1539	2.43e-05	0.00023796	1.15066	-3.08291	-3.10814	-3.01235	-3.03369	-3.07446	-3.09603	-3.22205	-3.13428	-3.27834	-3.32109	-3.32191	-3.27732	-3.28825	-3.31458	-3.28764	-3.28542
hsa-miR-154-3p	2.43e-05	0.00023796	1.15066	-3.08291	-3.10814	-3.01235	-3.03369	-3.07446	-3.09603	-3.22205	-3.13428	-3.27834	-3.32109	-3.32191	-3.27732	-3.28825	-3.31458	-3.28764	-3.28542
hsa-miR-154-5p	2.43e-05	0.00023796	1.15066	-3.08291	-3.10814	-3.01235	-3.03369	-3.07446	-3.09603	-3.22205	-3.13428	-3.27834	-3.32109	-3.32191	-3.27732	-3.28825	-3.31458	-3.28764	-3.28542
hsa-miR-155-3p	2.43e-05	0.00023796	1.15066	-3.08291	-3.10814	-3.01235	-3.03369	-3.07446	-3.09603	-3.22205	-3.13428	-3.27834	-3.32109	-3.32191	-3.27732	-3.28825	-3.31458	-3.28764	-3.28542
hsa-miR-155-5p	2.43e-05	0.00023796	1.15066	-3.08291	-3.10814	-3.01235	-3.03369	-3.07446	-3.09603	-3.22205	-3.13428	-3.27834	-3.32109	-3.32191	-3.27732	-3.28825	-3.31458	-3.28764	-3.28542
hsa-miR-1587	1.14e-05	0.00023796	0.156425	-3.08291	-3.10814	-3.01235	-3.03369	-3.07446	-3.09603	-3.22205	-3.13428	0.184418	-0.510604	-1.09095	-0.820963	-1.01727	0.690492	-0.950789	-1.03046
hsa-miR-15a-3p	2.43e-05	0.00023796	1.15066	-3.08291	-3.10814	-3.01235	-3.03369	-3.07446	-3.09603	-3.22205	-3.13428	-3.27834	-3.32109	-3.32191	-3.27732	-3.28825	-3.31458	-3.28764	-3.28542
hsa-miR-15a-5p	0.0463642	0.0860105	0.0742967	-3.08291	-3.10814	-3.01235	-3.03369	-3.07446	-3.09603	-3.22205	-3.13428	1.36687	1.11159	1.69706	2.07663	-3.28825	-3.31458	-3.28764	-3.28542
hsa-miR-15b-3p	2.43e-05	0.00023796	1.15066	-3.08291	-3.10814	-3.01235	-3.03369	-3.07446	-3.09603	-3.22205	-3.13428	-3.27834	-3.32109	-3.32191	-3.27732	-3.28825	-3.31458	-3.28764	-3.28542
hsa-miR-15b-5p	0.179162	0.281528	0.339648	-3.08291	2.11132	-3.01235	-3.03369	-3.07446	-3.09603	-3.22205	-3.13428	0.690492	2.0349	1.62399	2.56957	-3.28825	-3.31458	-3.28764	-3.28542
hsa-miR-16-1-3p	2.43e-05	0.00023796	1.15066	-3.08291	-3.10814	-3.01235	-3.03369	-3.07446	-3.09603	-3.22205	-3.13428	-3.27834	-3.32109	-3.32191	-3.27732	-3.28825	-3.31458	-3.28764	-3.28542
hsa-miR-16-2-3p	2.43e-05	0.00023796	1.15066	-3.08291	-3.10814	-3.01235	-3.03369	-3.07446	-3.09603	-3.22205	-3.13428	-3.27834	-3.32109	-3.32191	-3.27732	-3.28825	-3.31458	-3.28764	-3.28542
hsa-miR-16-5p	0.117099	0.140107	0.125924	-3.08291	2.47753	-3.01235	-3.03369	-3.07446	-3.09603	-3.22205	-3.13428	2.47753	3.87116	3.60188	4.16951	-3.28825	-3.31458	-3.28764	-3.28542
hsa-miR-17-3p	2.43e-05	0.00023796	1.15066	-3.08291	-3.10814	-3.01235	-3.03369	-3.07446	-3.09603	-3.22205	-3.13428	-3.27834	-3.32109	-3.32191	-3.27732	-3.28825	-3.31458	-3.28764	-3.28542
hsa-miR-17-5p	0.221585	0.269232	0.516399	-3.08291	-3.10814	-3.01235	-3.03369	-3.07446	-3.09603	-3.22205	-3.13428	-3.27834	-1.00494	-2.40044	-0.70035	-3.28825	-3.31458	-3.28764	-3.28542
hsa-miR-181a-2-3p	2.43e-05	0.00023796	1.15066	-3.08291	-3.10814	-3.01235	-3.03369	-3.07446	-3.09603	-3.22205	-3.13428	-3.27834	-3.32109	-3.32191	-3.27732	-3.28825	-3.31458	-3.28764	-3.28542
hsa-miR-181a-3p	2.43e-05	0.00023796	1.15066	-3.08291	-3.10814	-3.01235	-3.03369	-3.07446	-3.09603	-3.22205	-3.13428	-3.27834	-3.32109	-3.32191	-3.27732	-3.28825	-3.31458	-3.28764	-3.28542
hsa-miR-181a-5p	0.991786	0.994289	0.973256	-3.08291	-3.10814	-3.01235	-3.03369	-3.07446	-3.09603	-3.22205	-3.13428	-3.27834	-2.47759	-2.56566	-3.27732	-3.28825	-3.31458	-3.28764	-3.28542
hsa-miR-181b-3p	2.43e-05	0.00023796	1.15066	-3.08291	-3.10814	-3.01235	-3.03369	-3.07446	-3.09603	-3.22205	-3.13428	-3.27834	-3.32109	-3.32191	-3.27732	-3.28825	-3.31458	-3.28764	-3.28542
hsa-miR-181b-5p	2.43e-05	0.00023796	1.15066	-3.08291	-3.10814	-3.01235	-3.03369	-3.07446	-3.09603	-3.22205	-3.13428	-3.27834	-3.32109	-3.32191	-3.27732	-3.28825	-3.31458	-3.28764	-3.28542
hsa-miR-181c-3p	2.43e-05	0.00023796	1.15066	-3.08291	-3.10814	-3.01235	-3.03369	-3.07446	-3.09603	-3.22205	-3.13428	-3.27834	-3.32109	-3.32191	-3.27732	-3.28825	-3.31458	-3.28764	-3.28542
hsa-miR-181c-5p	2.43e-05	0.00023796	1.15066	-3.08291	-3.10814	-3.01235	-3.03369	-3.07446	-3.09603	-3.22205	-3.13428	-3.27834	-3.32109	-3.32191	-3.27732	-3.28825	-3.31458	-3.28764	-3.28542
hsa-miR-181d	2.43e-05	0.00023796	1.15066	-3.08291	-3.10814	-3.01235	-3.03369	-3.07446	-3.09603	-3.22205	-3.13428	-3.27834	-3.32109	-3.32191	-3.27732	-3.28825	-3.31458	-3.28764	-3.28542
hsa-miR-182-3p	2.43e-05	0.00023796	1.15066	-3.08291	-3.10814	-3.01235	-3.03369	-3.07446	-3.09603	-3.22205	-3.13428	-3.27834	-3.32109	-3.32191	-3.27732	-3.28825	-3.31458	-3.28764	-3.28542
hsa-miR-182-5p	2.43e-05	0.00023796	1.15066	-3.08291	-3.10814	-3.01235	-3.03369	-3.07446	-3.09603	-3.22205	-3.13428	-3.27834	-3.32109	-3.32191	-3.27732	-3.28825	-3.31458	-3.28764	-3.28542
hsa-miR-1825	0.264492	0.00023796	22.2993	-3.08291	-3.10814	-3.01235	4.11598	-3.07446	-3.09603	-3.22205	-3.13428	-3.27834	-3.32109	-3.32191	-3.27732	-3.28825	-3.31458	-3.28764	-3.28542
hsa-miR-1827	2.43e-05	0.00023796	1.15066	-3.08291	-3.10814	-3.01235	-3.03369	-3.07446	-3.09603	-3.22205	-3.13428	-3.27834	-3.32109	-3.32191	-3.27732	-3.28825	-3.31458	-3.28764	-3.28542
hsa-miR-183-3p	2.43e-05	0.00023796	1.15066	-3.08291	-3.10814	-3.01235	-3.03369	-3.07446	-3.09603	-3.22205	-3.13428	-3.27834	-3.32109	-3.32191	-3.27732	-3.28825	-3.31458	-3.28764	-3.28542
hsa-miR-183-5p	2.43e-05	0.00023796	1.15066	-3.08291	-3.10814	-3.01235	-3.03369	-3.07446	-3.09603	-3.22205	-3.13428	-3.27834	-3.32109	-3.32191	-3.27732	-3.28825	-3.31458	-3.28764	-3.28542
hsa-miR-184	0.60608	0.594387	0.944772	-3.08291	-3.10814	-3.01235	-3.03369	-3.07446	-3.09603	-0.0733799	-3.13428	-3.27834	-3.32109	-3.32191	-3.27732	-1.58227	-2.52574	-1.01727	-1.07057
hsa-miR-185-3p	2.43e-05	0.00023796	1.15066	-3.08291	-3.10814	-3.01235	-3.03369	-3.07446	-3.09603	-3.22205	-3.13428	-3.27834	-3.32109	-3.32191	-3.27732	-3.28825	-3.31458	-3.28764	-3.28542
hsa-miR-185-5p	2.43e-05	0.00023796	1.15066	-3.08291	-3.10814	-3.01235	-3.03369	-3.07446	-3.09603	-3.22205	-3.13428	-3.27834	-3.32109	-3.32191	-3.27732	-3.28825	-3.31458	-3.28764	-3.28542
hsa-miR-186-3p	2.43e-05	0.00023796	1.15066	-3.08291	-3.10814	-3.01235	-3.03369	-3.07446	-3.09603	-3.22205	-3.13428	-3.27834	-3.32109	-3.32191	-3.27732	-3.28825	-3.31458	-3.28764	-3.28542
hsa-miR-186-5p	0.0205878	0.0163159	1.10502	-3.08291	-3.10814	-3.01235	-3.03369	-3.07446	-3.09603	-3.22205	-3.13428	-3.27834	-2.90307	-3.32191	-3.27732	-3.28825	-3.31458	-3.28764	-3.28542
hsa-miR-187-3p	2.43e-05	0.00023796	1.15066	-3.08291	-3.10814	-3.01235	-3.03369	-3.07446	-3.09603	-3.22205	-3.13428	-3.27834	-3.32109	-3.32191	-3.27732	-3.28825	-3.31458	-3.28764	-3.28542
hsa-miR-187-5p	2.43e-05	0.00023796	1.15066	-3.08291	-3.10814	-3.01235	-3.03369	-3.07446	-3.09603	-3.22205	-3.13428	-3.27834	-3.32109	-3.32191	-3.27732	-3.28825	-3.31458	-3.28764	-3.28542
hsa-miR-188-3p	2.43e-05	0.00023796	1.15066	-3.08291	-3.10814	-3.01235	-3.03369	-3.07446	-3.09603	-3.22205	-3.13428	-3.27834	-3.32109	-3.32191	-3.27732	-3.28825	-3.31458	-3.28764	-3.28542
hsa-miR-188-5p	0.106987	0.12639	0.482231	-3.08291	-3.10814	-3.01235	-3.03369	-3.07446	-3.09603	0.402063	-3.13428	-3.27834	-2.37521	-2.40299	-3.27732	0.204696	-0.0860332	-0.155896	-0.183868
hsa-miR-18a-3p	2.43e-05	0.00023796	1.15066	-3.08291	-3.10814	-3.01235	-3.03369	-3.07446	-3.09603	-3.22205	-3.13428	-3.27834	-3.32109	-3.32191	-3.27732	-3.28825	-3.31458	-3.28764	-3.28542
hsa-miR-18a-5p	2.43e-05	0.00023796	1.15066	-3.08291	-3.10814	-3.01235	-3.03369	-3.07446	-3.09603	-3.22205	-3.13428	-3.27834	-3.32109	-3.32191	-3.27732	-3.28825	-3.31458	-3.28764	-3.28542
hsa-miR-18b-3p	2.43e-05	0.00023796	1.15066	-3.08291	-3.10814	-3.01235	-3.03369	-3.07446	-3.09603	-3.22205	-3.13428	-3.27834	-3.32109	-3.32191	-3.27732	-3.28825	-3.31458	-3.28764	-3.28542
hsa-miR-18b-5p	2.43e-05	0.00023796	1.15066	-3.08291	-3.10814	-3.01235	-3.03369	-3.07446	-3.09603	-3.22205	-3.13428	-3.27834	-3.32109	-3.32191	-3.27732	-3.28825	-3.31458	-3.28764	-3.28542
hsa-miR-1908	2.43e-05	0.00023796	1.15066	-3.08291	-3.10814	-3.01235	-3.03369	-3.07446	-3.09603	-3.22205	-3.13428	-3.27834	-3.32109	-3.32191	-3.27732	-3.28825	-3.31458	-3.28764	-3.28542
hsa-miR-1909-3p	2.43e-05	0.00023796	1.15066	-3.08291	-3.10814	-3.01235	-3.03369	-3.07446	-3.09603	-3.22205	-3.13428	-3.27834	-3.32109	-3.32191	-3.27732	-3.28825	-3.31458	-3.28764	-3.28542
hsa-miR-1909-5p	2.43e-05	0.00023796	1.15066	-3.08291	-3.10814	-3.01235	-3.03369	-3.07446	-3.09603	-3.22205	-3.13428	-3.27834	-3.32109	-3.32191	-3.27732	-3.28825	-3.31458	-3.28764	-3.28542
hsa-miR-190a	2.43e-05	0.00023796	1.15066	-3.08291	-3.10814	-3.01235	-3.03369	-3.07446	-3.09603	-3.22205	-3.13428	-3.27834	-3.32109	-3.32191	-3.27732	-3.28825	-3.31458	-3.28764	-3.28542
hsa-miR-190b	2.43e-05	0.00023796	1.15066	-3.08291	-3.10814	-3.01235	-3.03369	-3.07446	-3.09603	-3.22205	-3.13428	-3.27834	-3.32109	-3.32191	-3.27732	-3.28825	-3.31458	-3.28764	-3.28542
hsa-miR-191-3p	0.0142844	0.0114251	33.9638	3.02036	1.69625	4.98395	4.11598	3.02036	-3.09603	-0.260423	-3.13428	-0.675948	-2.90307	-3.01848	-1.09583	-2.14875	-3.31458	-1.90297	-3.28542
hsa-miR-191-5p	2.43e-05	0.00023796	1.15066	-3.08291	-3.10814	-3.01235	-3.03369	-3.07446	-3.09603	-3.22205	-3.13428	-3.27834	-3.32109	-3.32191	-3.27732	-3.28825	-3.31458	-3.28764	-3.28542
hsa-miR-1910	2.43e-05	0.00023796	1.15066	-3.08291	-3.10814	-3.01235	-3.03369	-3.07446	-3.09603	-3.22205	-3.13428	-3.27834	-3.32109	-3.32191	-3.27732	-3.28825	-3.31458	-3.28764	-3.28542
hsa-miR-1911-3p	2.43e-05	0.00023796	1.15066	-3.08291	-3.10814	-3.01235	-3.03369	-3.07446	-3.09603	-3.22205	-3.13428	-3.27834	-3.32109	-3.32191	-3.27732	-3.28825	-3.31458	-3.28764	-3.28542
hsa-miR-1911-5p	2.43e-05	0.00023796	1.15066	-3.08291	-3.10814	-3.01235	-3.03369	-3.07446	-3.09603	-3.22205	-3.13428	-3.27834	-3.32109	-3.32191	-3.27732	-3.28825	-3.31458	-3.28764	-3.28542
hsa-miR-1912	2.43e-05	0.00023796	1.15066	-3.08291	-3.10814	-3.01235	-3.03369	-3.07446	-3.09603	-3.22205	-3.13428	-3.27834	-3.32109	-3.32191	-3.27732	-3.28825	-3.31458	-3.28764	-3.28542
hsa-miR-1913	2.43e-05	0.00023796	1.15066	-3.08291	-3.10814	-3.01235	-3.03369	-3.07446	-3.09603	-3.22205	-3.13428	-3.27834	-3.32109	-3.32191	-3.27732	-3.28825	-3.31458	-3.28764	-3.28542
hsa-miR-1914-3p	0.000437979	0.00146981	0.133433	-3.08291	-3.10814	-3.01235	-3.03369	-3.07446	-3.09603	-3.22205	-3.13428	-3.27834	-0.155896	0.160329	-0.883827	0.373177	-0.106771	0.25626	-0.0860332
hsa-miR-1914-5p	2.43e-05	0.00023796	1.15066	-3.08291	-3.10814	-3.01235	-3.03369	-3.07446	-3.09603	-3.22205	-3.13428	-3.27834	-3.32109	-3.32191	-3.27732	-3.28825	-3.31458	-3.28764	-3.28542
hsa-miR-1915-3p	0.0227415	0.0248183	0.500655	-3.08291	-3.10814	-3.01235	-3.03369	-3.07446	3.30968	3.02036	3.30968	3.87116	2.07663	1.71325	2.47753	1.71325	3.41867	2.56957	3.23318
hsa-miR-1915-5p	2.43e-05	0.00023796	1.15066	-3.08291	-3.10814	-3.01235	-3.03369	-3.07446	-3.09603	-3.22205	-3.13428	-3.27834	-3.32109	-3.32191	-3.27732	-3.28825	-3.31458	-3.28764	-3.28542
hsa-miR-192-3p	2.43e-05	0.00023796	1.15066	-3.08291	-3.10814	-3.01235	-3.03369	-3.07446	-3.09603	-3.22205	-3.13428	-3.27834	-3.32109	-3.32191	-3.27732	-3.28825	-3.31458	-3.28764	-3.28542
hsa-miR-192-5p	2.43e-05	0.00023796	1.15066	-3.08291	-3.10814	-3.01235	-3.03369	-3.07446	-3.09603	-3.22205	-3.13428	-3.27834	-3.32109	-3.32191	-3.27732	-3.28825	-3.31458	-3.28764	-3.28542
hsa-miR-193a-3p	2.43e-05	0.00023796	1.15066	-3.08291	-3.10814	-3.01235	-3.03369	-3.07446	-3.09603	-3.22205	-3.13428	-3.27834	-3.32109	-3.32191	-3.27732	-3.28825	-3.31458	-3.28764	-3.28542
hsa-miR-193a-5p	0.0694235	0.0782775	0.653152	-3.08291	-3.10814	-3.01235	-3.03369	-3.07446	-3.09603	1.76003	-3.13428	0.442089	-1.58227	-2.5395	-3.27732	1.05464	0.110216	-0.231738	-1.05899
hsa-miR-193b-3p	2.43e-05	0.00023796	1.15066	-3.08291	-3.10814	-3.01235	-3.03369	-3.07446	-3.09603	-3.22205	-3.13428	-3.27834	-3.32109	-3.32191	-3.27732	-3.28825	-3.31458	-3.28764	-3.28542
hsa-miR-193b-5p	0.617689	0.581412	0.885633	-3.08291	-3.10814	-3.01235	-3.03369	-3.07446	-3.09603	0.479904	-3.13428	-3.27834	-3.32109	-3.32191	-3.27732	-0.200924	-0.980708	-0.675948	-3.28542
hsa-miR-194-3p	2.43e-05	0.00023796	1.15066	-3.08291	-3.10814	-3.01235	-3.03369	-3.07446	-3.09603	-3.22205	-3.13428	-3.27834	-3.32109	-3.32191	-3.27732	-3.28825	-3.31458	-3.28764	-3.28542
hsa-miR-194-5p	2.43e-05	0.00023796	1.15066	-3.08291	-3.10814	-3.01235	-3.03369	-3.07446	-3.09603	-3.22205	-3.13428	-3.27834	-3.32109	-3.32191	-3.27732	-3.28825	-3.31458	-3.28764	-3.28542
hsa-miR-195-3p	2.43e-05	0.00023796	1.15066	-3.08291	-3.10814	-3.01235	-3.03369	-3.07446	-3.09603	-3.22205	-3.13428	-3.27834	-3.32109	-3.32191	-3.27732	-3.28825	-3.31458	-3.28764	-3.28542
hsa-miR-195-5p	2.43e-05	0.00023796	1.15066	-3.08291	-3.10814	-3.01235	-3.03369	-3.07446	-3.09603	-3.22205	-3.13428	-3.27834	-3.32109	-3.32191	-3.27732	-3.28825	-3.31458	-3.28764	-3.28542
hsa-miR-196a-3p	2.43e-05	0.00023796	1.15066	-3.08291	-3.10814	-3.01235	-3.03369	-3.07446	-3.09603	-3.22205	-3.13428	-3.27834	-3.32109	-3.32191	-3.27732	-3.28825	-3.31458	-3.28764	-3.28542
hsa-miR-196a-5p	2.43e-05	0.00023796	1.15066	-3.08291	-3.10814	-3.01235	-3.03369	-3.07446	-3.09603	-3.22205	-3.13428	-3.27834	-3.32109	-3.32191	-3.27732	-3.28825	-3.31458	-3.28764	-3.28542
hsa-miR-196b-3p	2.43e-05	0.00023796	1.15066	-3.08291	-3.10814	-3.01235	-3.03369	-3.07446	-3.09603	-3.22205	-3.13428	-3.27834	-3.32109	-3.32191	-3.27732	-3.28825	-3.31458	-3.28764	-3.28542
hsa-miR-196b-5p	2.43e-05	0.00023796	1.15066	-3.08291	-3.10814	-3.01235	-3.03369	-3.07446	-3.09603	-3.22205	-3.13428	-3.27834	-3.32109	-3.32191	-3.27732	-3.28825	-3.31458	-3.28764	-3.28542
hsa-miR-197-3p	0.0693605	0.0880083	0.195656	-3.08291	-3.10814	-3.01235	-3.03369	-3.07446	-3.09603	-3.22205	-3.13428	-3.27834	0.613855	-0.260423	0.747469	-3.28825	-3.31458	-1.5766	-3.28542
hsa-miR-197-5p	0.027801	0.0127383	0.389028	-3.08291	7.29293	-3.01235	-3.03369	5.69761	4.0874	2.56957	5.02553	4.66501	6.92169	7.29293	5.80537	6.92169	5.53619	6.603	5.80537
hsa-miR-1972	0.466139	0.586353	1.03777	-3.08291	-3.10814	-3.01235	-3.03369	-3.07446	-3.09603	-3.22205	-3.13428	-3.27834	-3.32109	-3.32191	-3.27732	-3.28825	-2.40299	-3.28764	-3.28542
hsa-miR-1973	2.43e-05	0.00023796	1.15066	-3.08291	-3.10814	-3.01235	-3.03369	-3.07446	-3.09603	-3.22205	-3.13428	-3.27834	-3.32109	-3.32191	-3.27732	-3.28825	-3.31458	-3.28764	-3.28542
hsa-miR-1976	2.43e-05	0.00023796	1.15066	-3.08291	-3.10814	-3.01235	-3.03369	-3.07446	-3.09603	-3.22205	-3.13428	-3.27834	-3.32109	-3.32191	-3.27732	-3.28825	-3.31458	-3.28764	-3.28542
hsa-miR-198	2.43e-05	0.00023796	1.15066	-3.08291	-3.10814	-3.01235	-3.03369	-3.07446	-3.09603	-3.22205	-3.13428	-3.27834	-3.32109	-3.32191	-3.27732	-3.28825	-3.31458	-3.28764	-3.28542
hsa-miR-199a-3p	0.539643	0.564707	1.0279	-3.08291	-3.10814	-3.01235	-3.03369	-3.07446	-3.09603	-3.22205	-3.13428	-3.27834	-2.6253	-2.88664	-3.27732	-3.28825	-3.31458	-3.28764	-3.28542
hsa-miR-199a-5p	2.43e-05	0.00023796	1.15066	-3.08291	-3.10814	-3.01235	-3.03369	-3.07446	-3.09603	-3.22205	-3.13428	-3.27834	-3.32109	-3.32191	-3.27732	-3.28825	-3.31458	-3.28764	-3.28542
hsa-miR-199b-5p	0.266277	0.291018	1.06377	-3.08291	-3.10814	-3.01235	-3.03369	-3.07446	-3.09603	-3.22205	-3.13428	-3.27834	-2.58589	-3.32191	-3.27732	-3.28825	-3.31458	-3.28764	-3.28542
hsa-miR-19a-3p	0.0681684	0.0860105	0.220821	-3.08291	-3.10814	-3.01235	-3.03369	-3.07446	-3.09603	-3.22205	-3.13428	-0.801346	-0.930061	-0.481298	1.0139	-3.28825	-3.31458	-3.28764	-3.28542
hsa-miR-19a-5p	2.43e-05	0.00023796	1.15066	-3.08291	-3.10814	-3.01235	-3.03369	-3.07446	-3.09603	-3.22205	-3.13428	-3.27834	-3.32109	-3.32191	-3.27732	-3.28825	-3.31458	-3.28764	-3.28542
hsa-miR-19b-1-5p	2.43e-05	0.00023796	1.15066	-3.08291	-3.10814	-3.01235	-3.03369	-3.07446	-3.09603	-3.22205	-3.13428	-3.27834	-3.32109	-3.32191	-3.27732	-3.28825	-3.31458	-3.28764	-3.28542
hsa-miR-19b-2-5p	2.43e-05	0.00023796	1.15066	-3.08291	-3.10814	-3.01235	-3.03369	-3.07446	-3.09603	-3.22205	-3.13428	-3.27834	-3.32109	-3.32191	-3.27732	-3.28825	-3.31458	-3.28764	-3.28542
hsa-miR-19b-3p	0.0611391	0.0860105	0.0743679	-3.08291	-3.10814	-3.01235	-3.03369	-3.07446	-3.09603	-3.22205	-3.13428	0.53678	-0.0552746	0.442089	3.07327	-3.28825	-3.31458	-3.28764	-3.28542
hsa-miR-200a-3p	0.162024	0.179292	0.475501	-3.08291	-3.10814	-3.01235	-3.03369	-3.07446	-3.09603	-3.22205	-3.13428	-0.52384	-2.56566	-2.5823	-0.913735	-3.28825	-3.31458	-3.28764	-3.28542
hsa-miR-200a-5p	2.43e-05	0.00023796	1.15066	-3.08291	-3.10814	-3.01235	-3.03369	-3.07446	-3.09603	-3.22205	-3.13428	-3.27834	-3.32109	-3.32191	-3.27732	-3.28825	-3.31458	-3.28764	-3.28542
hsa-miR-200b-3p	0.0954652	0.0865655	0.326238	-3.08291	-3.10814	-3.01235	-3.03369	-3.07446	-3.09603	-3.22205	-3.13428	0.276023	-1.35981	-2.14875	-0.649337	-3.28825	-3.31458	-3.28764	-3.28542
hsa-miR-200b-5p	2.43e-05	0.00023796	1.15066	-3.08291	-3.10814	-3.01235	-3.03369	-3.07446	-3.09603	-3.22205	-3.13428	-3.27834	-3.32109	-3.32191	-3.27732	-3.28825	-3.31458	-3.28764	-3.28542
hsa-miR-200c-3p	0.11655	0.095394	0.352538	-3.08291	-3.10814	-3.01235	-3.03369	-3.07446	-3.09603	-3.22205	-3.13428	0.333962	-1.61201	-2.36678	-1.09583	-3.28825	-3.31458	-3.28764	-3.28542
hsa-miR-200c-5p	2.43e-05	0.00023796	1.15066	-3.08291	-3.10814	-3.01235	-3.03369	-3.07446	-3.09603	-3.22205	-3.13428	-3.27834	-3.32109	-3.32191	-3.27732	-3.28825	-3.31458	-3.28764	-3.28542
hsa-miR-202-3p	2.43e-05	0.00023796	1.15066	-3.08291	-3.10814	-3.01235	-3.03369	-3.07446	-3.09603	-3.22205	-3.13428	-3.27834	-3.32109	-3.32191	-3.27732	-3.28825	-3.31458	-3.28764	-3.28542
hsa-miR-202-5p	2.43e-05	0.00023796	1.15066	-3.08291	-3.10814	-3.01235	-3.03369	-3.07446	-3.09603	-3.22205	-3.13428	-3.27834	-3.32109	-3.32191	-3.27732	-3.28825	-3.31458	-3.28764	-3.28542
hsa-miR-203a	0.0478571	0.0860105	0.0784662	-3.08291	-3.10814	-3.01235	-3.03369	-3.07446	-3.09603	-3.22205	-3.13428	2.14251	1.62399	0.709997	1.26137	-3.28825	-3.31458	-3.28764	-3.28542
hsa-miR-203b-3p	2.43e-05	0.00023796	1.15066	-3.08291	-3.10814	-3.01235	-3.03369	-3.07446	-3.09603	-3.22205	-3.13428	-3.27834	-3.32109	-3.32191	-3.27732	-3.28825	-3.31458	-3.28764	-3.28542
hsa-miR-203b-5p	2.43e-05	0.00023796	1.15066	-3.08291	-3.10814	-3.01235	-3.03369	-3.07446	-3.09603	-3.22205	-3.13428	-3.27834	-3.32109	-3.32191	-3.27732	-3.28825	-3.31458	-3.28764	-3.28542
hsa-miR-204-3p	2.43e-05	0.00023796	1.15066	-3.08291	-3.10814	-3.01235	-3.03369	-3.07446	-3.09603	-3.22205	-3.13428	-3.27834	-3.32109	-3.32191	-3.27732	-3.28825	-3.31458	-3.28764	-3.28542
hsa-miR-204-5p	2.43e-05	0.00023796	1.15066	-3.08291	-3.10814	-3.01235	-3.03369	-3.07446	-3.09603	-3.22205	-3.13428	-3.27834	-3.32109	-3.32191	-3.27732	-3.28825	-3.31458	-3.28764	-3.28542
hsa-miR-205-3p	2.43e-05	0.00023796	1.15066	-3.08291	-3.10814	-3.01235	-3.03369	-3.07446	-3.09603	-3.22205	-3.13428	-3.27834	-3.32109	-3.32191	-3.27732	-3.28825	-3.31458	-3.28764	-3.28542
hsa-miR-205-5p	0.0661252	0.0860105	0.398059	-3.08291	-3.10814	-3.01235	-3.03369	-3.07446	-3.09603	-3.22205	-3.13428	-1.13343	-1.06881	-1.07057	-0.897512	-3.28825	-3.31458	-3.28764	-3.28542
hsa-miR-2052	2.43e-05	0.00023796	1.15066	-3.08291	-3.10814	-3.01235	-3.03369	-3.07446	-3.09603	-3.22205	-3.13428	-3.27834	-3.32109	-3.32191	-3.27732	-3.28825	-3.31458	-3.28764	-3.28542
hsa-miR-2053	2.43e-05	0.00023796	1.15066	-3.08291	-3.10814	-3.01235	-3.03369	-3.07446	-3.09603	-3.22205	-3.13428	-3.27834	-3.32109	-3.32191	-3.27732	-3.28825	-3.31458	-3.28764	-3.28542
hsa-miR-206	2.43e-05	0.00023796	1.15066	-3.08291	-3.10814	-3.01235	-3.03369	-3.07446	-3.09603	-3.22205	-3.13428	-3.27834	-3.32109	-3.32191	-3.27732	-3.28825	-3.31458	-3.28764	-3.28542
hsa-miR-208a	2.43e-05	0.00023796	1.15066	-3.08291	-3.10814	-3.01235	-3.03369	-3.07446	-3.09603	-3.22205	-3.13428	-3.27834	-3.32109	-3.32191	-3.27732	-3.28825	-3.31458	-3.28764	-3.28542
hsa-miR-208b	2.43e-05	0.00023796	1.15066	-3.08291	-3.10814	-3.01235	-3.03369	-3.07446	-3.09603	-3.22205	-3.13428	-3.27834	-3.32109	-3.32191	-3.27732	-3.28825	-3.31458	-3.28764	-3.28542
hsa-miR-20a-3p	2.43e-05	0.00023796	1.15066	-3.08291	-3.10814	-3.01235	-3.03369	-3.07446	-3.09603	-3.22205	-3.13428	-3.27834	-3.32109	-3.32191	-3.27732	-3.28825	-3.31458	-3.28764	-3.28542
hsa-miR-20a-5p	0.0515567	0.0860105	0.170791	-3.08291	-3.10814	-3.01235	-3.03369	-3.07446	-3.09603	-3.22205	-3.13428	-0.0168114	0.313855	0.300676	0.690492	-3.28825	-3.31458	-3.28764	-3.28542
hsa-miR-20b-3p	2.43e-05	0.00023796	1.15066	-3.08291	-3.10814	-3.01235	-3.03369	-3.07446	-3.09603	-3.22205	-3.13428	-3.27834	-3.32109	-3.32191	-3.27732	-3.28825	-3.31458	-3.28764	-3.28542
hsa-miR-20b-5p	0.348299	0.407949	0.688636	-3.08291	-3.10814	-3.01235	-3.03369	-3.07446	-3.09603	-3.22205	-3.13428	-3.27834	-2.43162	-2.55639	-1.01727	-3.28825	-3.31458	-3.28764	-3.28542
hsa-miR-21-3p	2.43e-05	0.00023796	1.15066	-3.08291	-3.10814	-3.01235	-3.03369	-3.07446	-3.09603	-3.22205	-3.13428	-3.27834	-3.32109	-3.32191	-3.27732	-3.28825	-3.31458	-3.28764	-3.28542
hsa-miR-21-5p	0.115205	0.13139	0.116664	-3.08291	2.0349	-3.01235	-3.03369	-3.07446	-3.09603	-3.22205	-3.13428	4.35597	2.56957	2.56957	3.23318	-3.28825	-3.31458	-3.28764	-3.28542
hsa-miR-210	0.983948	0.991665	0.9694	-3.08291	-3.10814	-3.01235	-3.03369	-3.07446	-3.09603	-3.22205	-3.13428	-3.27834	-2.48492	-2.52574	-3.27732	-3.28825	-3.31458	-3.28764	-3.28542
hsa-miR-211-3p	0.041302	0.0329994	0.34932	-3.08291	-3.10814	-3.01235	-3.03369	-3.07446	-3.09603	-3.22205	-3.13428	-3.27834	-3.32109	-2.5177	-3.27732	-0.771228	-0.714654	-0.559837	-1.61201
hsa-miR-211-5p	2.43e-05	0.00023796	1.15066	-3.08291	-3.10814	-3.01235	-3.03369	-3.07446	-3.09603	-3.22205	-3.13428	-3.27834	-3.32109	-3.32191	-3.27732	-3.28825	-3.31458	-3.28764	-3.28542
hsa-miR-2110	2.43e-05	0.00023796	1.15066	-3.08291	-3.10814	-3.01235	-3.03369	-3.07446	-3.09603	-3.22205	-3.13428	-3.27834	-3.32109	-3.32191	-3.27732	-3.28825	-3.31458	-3.28764	-3.28542
hsa-miR-2113	2.43e-05	0.00023796	1.15066	-3.08291	-3.10814	-3.01235	-3.03369	-3.07446	-3.09603	-3.22205	-3.13428	-3.27834	-3.32109	-3.32191	-3.27732	-3.28825	-3.31458	-3.28764	-3.28542
hsa-miR-2114-3p	2.43e-05	0.00023796	1.15066	-3.08291	-3.10814	-3.01235	-3.03369	-3.07446	-3.09603	-3.22205	-3.13428	-3.27834	-3.32109	-3.32191	-3.27732	-3.28825	-3.31458	-3.28764	-3.28542
hsa-miR-2114-5p	2.43e-05	0.00023796	1.15066	-3.08291	-3.10814	-3.01235	-3.03369	-3.07446	-3.09603	-3.22205	-3.13428	-3.27834	-3.32109	-3.32191	-3.27732	-3.28825	-3.31458	-3.28764	-3.28542
hsa-miR-2115-3p	2.43e-05	0.00023796	1.15066	-3.08291	-3.10814	-3.01235	-3.03369	-3.07446	-3.09603	-3.22205	-3.13428	-3.27834	-3.32109	-3.32191	-3.27732	-3.28825	-3.31458	-3.28764	-3.28542
hsa-miR-2115-5p	2.43e-05	0.00023796	1.15066	-3.08291	-3.10814	-3.01235	-3.03369	-3.07446	-3.09603	-3.22205	-3.13428	-3.27834	-3.32109	-3.32191	-3.27732	-3.28825	-3.31458	-3.28764	-3.28542
hsa-miR-2116-3p	2.43e-05	0.00023796	1.15066	-3.08291	-3.10814	-3.01235	-3.03369	-3.07446	-3.09603	-3.22205	-3.13428	-3.27834	-3.32109	-3.32191	-3.27732	-3.28825	-3.31458	-3.28764	-3.28542
hsa-miR-2116-5p	2.43e-05	0.00023796	1.15066	-3.08291	-3.10814	-3.01235	-3.03369	-3.07446	-3.09603	-3.22205	-3.13428	-3.27834	-3.32109	-3.32191	-3.27732	-3.28825	-3.31458	-3.28764	-3.28542
hsa-miR-2117	2.43e-05	0.00023796	1.15066	-3.08291	-3.10814	-3.01235	-3.03369	-3.07446	-3.09603	-3.22205	-3.13428	-3.27834	-3.32109	-3.32191	-3.27732	-3.28825	-3.31458	-3.28764	-3.28542
hsa-miR-212-3p	2.43e-05	0.00023796	1.15066	-3.08291	-3.10814	-3.01235	-3.03369	-3.07446	-3.09603	-3.22205	-3.13428	-3.27834	-3.32109	-3.32191	-3.27732	-3.28825	-3.31458	-3.28764	-3.28542
hsa-miR-212-5p	2.43e-05	0.00023796	1.15066	-3.08291	-3.10814	-3.01235	-3.03369	-3.07446	-3.09603	-3.22205	-3.13428	-3.27834	-3.32109	-3.32191	-3.27732	-3.28825	-3.31458	-3.28764	-3.28542
hsa-miR-214-3p	2.43e-05	0.00023796	1.15066	-3.08291	-3.10814	-3.01235	-3.03369	-3.07446	-3.09603	-3.22205	-3.13428	-3.27834	-3.32109	-3.32191	-3.27732	-3.28825	-3.31458	-3.28764	-3.28542
hsa-miR-214-5p	2.43e-05	0.00023796	1.15066	-3.08291	-3.10814	-3.01235	-3.03369	-3.07446	-3.09603	-3.22205	-3.13428	-3.27834	-3.32109	-3.32191	-3.27732	-3.28825	-3.31458	-3.28764	-3.28542
hsa-miR-215	2.43e-05	0.00023796	1.15066	-3.08291	-3.10814	-3.01235	-3.03369	-3.07446	-3.09603	-3.22205	-3.13428	-3.27834	-3.32109	-3.32191	-3.27732	-3.28825	-3.31458	-3.28764	-3.28542
hsa-miR-216a-3p	2.43e-05	0.00023796	1.15066	-3.08291	-3.10814	-3.01235	-3.03369	-3.07446	-3.09603	-3.22205	-3.13428	-3.27834	-3.32109	-3.32191	-3.27732	-3.28825	-3.31458	-3.28764	-3.28542
hsa-miR-216a-5p	2.43e-05	0.00023796	1.15066	-3.08291	-3.10814	-3.01235	-3.03369	-3.07446	-3.09603	-3.22205	-3.13428	-3.27834	-3.32109	-3.32191	-3.27732	-3.28825	-3.31458	-3.28764	-3.28542
hsa-miR-216b	2.43e-05	0.00023796	1.15066	-3.08291	-3.10814	-3.01235	-3.03369	-3.07446	-3.09603	-3.22205	-3.13428	-3.27834	-3.32109	-3.32191	-3.27732	-3.28825	-3.31458	-3.28764	-3.28542
hsa-miR-217	2.43e-05	0.00023796	1.15066	-3.08291	-3.10814	-3.01235	-3.03369	-3.07446	-3.09603	-3.22205	-3.13428	-3.27834	-3.32109	-3.32191	-3.27732	-3.28825	-3.31458	-3.28764	-3.28542
hsa-miR-218-1-3p	2.43e-05	0.00023796	1.15066	-3.08291	-3.10814	-3.01235	-3.03369	-3.07446	-3.09603	-3.22205	-3.13428	-3.27834	-3.32109	-3.32191	-3.27732	-3.28825	-3.31458	-3.28764	-3.28542
hsa-miR-218-2-3p	2.43e-05	0.00023796	1.15066	-3.08291	-3.10814	-3.01235	-3.03369	-3.07446	-3.09603	-3.22205	-3.13428	-3.27834	-3.32109	-3.32191	-3.27732	-3.28825	-3.31458	-3.28764	-3.28542
hsa-miR-218-5p	2.43e-05	0.00023796	1.15066	-3.08291	-3.10814	-3.01235	-3.03369	-3.07446	-3.09603	-3.22205	-3.13428	-3.27834	-3.32109	-3.32191	-3.27732	-3.28825	-3.31458	-3.28764	-3.28542
hsa-miR-219-1-3p	2.43e-05	0.00023796	1.15066	-3.08291	-3.10814	-3.01235	-3.03369	-3.07446	-3.09603	-3.22205	-3.13428	-3.27834	-3.32109	-3.32191	-3.27732	-3.28825	-3.31458	-3.28764	-3.28542
hsa-miR-219-2-3p	2.43e-05	0.00023796	1.15066	-3.08291	-3.10814	-3.01235	-3.03369	-3.07446	-3.09603	-3.22205	-3.13428	-3.27834	-3.32109	-3.32191	-3.27732	-3.28825	-3.31458	-3.28764	-3.28542
hsa-miR-219-5p	2.43e-05	0.00023796	1.15066	-3.08291	-3.10814	-3.01235	-3.03369	-3.07446	-3.09603	-3.22205	-3.13428	-3.27834	-3.32109	-3.32191	-3.27732	-3.28825	-3.31458	-3.28764	-3.28542
hsa-miR-22-3p	1.84e-05	0.00023796	0.065285	-3.08291	-3.10814	-3.01235	-3.03369	-3.07446	-3.09603	-3.22205	-3.13428	1.62399	0.456188	1.05464	2.11132	-0.675948	-0.599926	0.333962	-0.0733799
hsa-miR-22-5p	2.43e-05	0.00023796	1.15066	-3.08291	-3.10814	-3.01235	-3.03369	-3.07446	-3.09603	-3.22205	-3.13428	-3.27834	-3.32109	-3.32191	-3.27732	-3.28825	-3.31458	-3.28764	-3.28542
hsa-miR-221-3p	2.43e-05	0.00023796	1.15066	-3.08291	-3.10814	-3.01235	-3.03369	-3.07446	-3.09603	-3.22205	-3.13428	-3.27834	-3.32109	-3.32191	-3.27732	-3.28825	-3.31458	-3.28764	-3.28542
hsa-miR-221-5p	2.43e-05	0.00023796	1.15066	-3.08291	-3.10814	-3.01235	-3.03369	-3.07446	-3.09603	-3.22205	-3.13428	-3.27834	-3.32109	-3.32191	-3.27732	-3.28825	-3.31458	-3.28764	-3.28542
hsa-miR-222-3p	2.43e-05	0.00023796	1.15066	-3.08291	-3.10814	-3.01235	-3.03369	-3.07446	-3.09603	-3.22205	-3.13428	-3.27834	-3.32109	-3.32191	-3.27732	-3.28825	-3.31458	-3.28764	-3.28542
hsa-miR-222-5p	2.43e-05	0.00023796	1.15066	-3.08291	-3.10814	-3.01235	-3.03369	-3.07446	-3.09603	-3.22205	-3.13428	-3.27834	-3.32109	-3.32191	-3.27732	-3.28825	-3.31458	-3.28764	-3.28542
hsa-miR-223-3p	0.243555	0.205532	0.510881	4.82129	8.50142	-3.01235	-3.03369	-3.07446	-3.09603	-3.22205	-3.13428	6.0381	7.75402	6.92169	8.50142	-3.28825	-2.42491	-1.11382	-3.28542
hsa-miR-223-5p	0.0930724	0.0870724	1.07533	-3.08291	-3.10814	-3.01235	-3.03369	-3.07446	-3.09603	-3.22205	-3.13428	-3.27834	-2.90307	-3.01848	-3.27732	-3.28825	-3.31458	-3.28764	-3.28542
hsa-miR-224-3p	2.43e-05	0.00023796	1.15066	-3.08291	-3.10814	-3.01235	-3.03369	-3.07446	-3.09603	-3.22205	-3.13428	-3.27834	-3.32109	-3.32191	-3.27732	-3.28825	-3.31458	-3.28764	-3.28542
hsa-miR-224-5p	2.43e-05	0.00023796	1.15066	-3.08291	-3.10814	-3.01235	-3.03369	-3.07446	-3.09603	-3.22205	-3.13428	-3.27834	-3.32109	-3.32191	-3.27732	-3.28825	-3.31458	-3.28764	-3.28542
hsa-miR-2276	0.0836334	0.0993209	0.46568	-3.08291	-3.10814	-3.01235	-3.03369	-3.07446	-3.09603	1.11159	-3.13428	-3.27834	-1.13646	-2.42491	-3.27732	0.999929	0.135307	0.442089	0.160329
hsa-miR-2277-3p	2.43e-05	0.00023796	1.15066	-3.08291	-3.10814	-3.01235	-3.03369	-3.07446	-3.09603	-3.22205	-3.13428	-3.27834	-3.32109	-3.32191	-3.27732	-3.28825	-3.31458	-3.28764	-3.28542
hsa-miR-2277-5p	2.43e-05	0.00023796	1.15066	-3.08291	-3.10814	-3.01235	-3.03369	-3.07446	-3.09603	-3.22205	-3.13428	-3.27834	-3.32109	-3.32191	-3.27732	-3.28825	-3.31458	-3.28764	-3.28542
hsa-miR-2278	0.416951	0.503353	1.04449	-3.08291	-3.10814	-3.01235	-3.03369	-3.07446	-3.09603	-3.22205	-3.13428	-3.27834	-3.32109	-3.32191	-3.27732	-3.28825	-2.44797	-3.28764	-3.28542
hsa-miR-2355-3p	2.43e-05	0.00023796	1.15066	-3.08291	-3.10814	-3.01235	-3.03369	-3.07446	-3.09603	-3.22205	-3.13428	-3.27834	-3.32109	-3.32191	-3.27732	-3.28825	-3.31458	-3.28764	-3.28542
hsa-miR-2355-5p	2.43e-05	0.00023796	1.15066	-3.08291	-3.10814	-3.01235	-3.03369	-3.07446	-3.09603	-3.22205	-3.13428	-3.27834	-3.32109	-3.32191	-3.27732	-3.28825	-3.31458	-3.28764	-3.28542
hsa-miR-2392	0.00218224	0.00940132	0.283502	-3.08291	-3.10814	-3.01235	-3.03369	-3.07446	-3.09603	-0.0352333	-3.13428	0.479904	-0.714654	-0.70035	-3.27732	0.00774522	0.0522754	-0.547165	-0.121499
hsa-miR-23a-3p	0.206448	0.289209	0.409151	-3.08291	3.20967	-3.01235	-3.03369	-3.07446	-3.09603	-3.22205	-3.13428	1.1931	2.86355	1.32389	3.60188	-3.28825	-3.31458	-3.28764	-3.28542
hsa-miR-23a-5p	2.43e-05	0.00023796	1.15066	-3.08291	-3.10814	-3.01235	-3.03369	-3.07446	-3.09603	-3.22205	-3.13428	-3.27834	-3.32109	-3.32191	-3.27732	-3.28825	-3.31458	-3.28764	-3.28542
hsa-miR-23b-3p	0.0681855	0.0860105	0.350257	-3.08291	-3.10814	-3.01235	-3.03369	-3.07446	-3.09603	-3.22205	-3.13428	-0.260423	-0.950789	-1.35981	-0.930061	-3.28825	-3.31458	-3.28764	-3.28542
hsa-miR-23b-5p	2.43e-05	0.00023796	1.15066	-3.08291	-3.10814	-3.01235	-3.03369	-3.07446	-3.09603	-3.22205	-3.13428	-3.27834	-3.32109	-3.32191	-3.27732	-3.28825	-3.31458	-3.28764	-3.28542
hsa-miR-23c	2.43e-05	0.00023796	1.15066	-3.08291	-3.10814	-3.01235	-3.03369	-3.07446	-3.09603	-3.22205	-3.13428	-3.27834	-3.32109	-3.32191	-3.27732	-3.28825	-3.31458	-3.28764	-3.28542
hsa-miR-24-1-5p	2.43e-05	0.00023796	1.15066	-3.08291	-3.10814	-3.01235	-3.03369	-3.07446	-3.09603	-3.22205	-3.13428	-3.27834	-3.32109	-3.32191	-3.27732	-3.28825	-3.31458	-3.28764	-3.28542
hsa-miR-24-2-5p	2.43e-05	0.00023796	1.15066	-3.08291	-3.10814	-3.01235	-3.03369	-3.07446	-3.09603	-3.22205	-3.13428	-3.27834	-3.32109	-3.32191	-3.27732	-3.28825	-3.31458	-3.28764	-3.28542
hsa-miR-24-3p	0.0468825	0.0860105	0.0813306	-3.08291	-3.10814	-3.01235	-3.03369	-3.07446	-3.09603	-3.22205	-3.13428	1.32389	1.05464	1.28188	2.0349	-3.28825	-3.31458	-3.28764	-3.28542
hsa-miR-2467-3p	2.43e-05	0.00023796	1.15066	-3.08291	-3.10814	-3.01235	-3.03369	-3.07446	-3.09603	-3.22205	-3.13428	-3.27834	-3.32109	-3.32191	-3.27732	-3.28825	-3.31458	-3.28764	-3.28542
hsa-miR-2467-5p	2.43e-05	0.00023796	1.15066	-3.08291	-3.10814	-3.01235	-3.03369	-3.07446	-3.09603	-3.22205	-3.13428	-3.27834	-3.32109	-3.32191	-3.27732	-3.28825	-3.31458	-3.28764	-3.28542
hsa-miR-25-3p	0.058965	0.0860105	0.172562	-3.08291	-3.10814	-3.01235	-3.03369	-3.07446	-3.09603	-3.22205	-3.13428	-1.03046	0.709997	0.554514	0.512673	-3.28825	-3.31458	-3.28764	-3.28542
hsa-miR-25-5p	2.43e-05	0.00023796	1.15066	-3.08291	-3.10814	-3.01235	-3.03369	-3.07446	-3.09603	-3.22205	-3.13428	-3.27834	-3.32109	-3.32191	-3.27732	-3.28825	-3.31458	-3.28764	-3.28542
hsa-miR-2681-3p	2.43e-05	0.00023796	1.15066	-3.08291	-3.10814	-3.01235	-3.03369	-3.07446	-3.09603	-3.22205	-3.13428	-3.27834	-3.32109	-3.32191	-3.27732	-3.28825	-3.31458	-3.28764	-3.28542
hsa-miR-2681-5p	2.43e-05	0.00023796	1.15066	-3.08291	-3.10814	-3.01235	-3.03369	-3.07446	-3.09603	-3.22205	-3.13428	-3.27834	-3.32109	-3.32191	-3.27732	-3.28825	-3.31458	-3.28764	-3.28542
hsa-miR-2682-3p	2.43e-05	0.00023796	1.15066	-3.08291	-3.10814	-3.01235	-3.03369	-3.07446	-3.09603	-3.22205	-3.13428	-3.27834	-3.32109	-3.32191	-3.27732	-3.28825	-3.31458	-3.28764	-3.28542
hsa-miR-2682-5p	2.43e-05	0.00023796	1.15066	-3.08291	-3.10814	-3.01235	-3.03369	-3.07446	-3.09603	-3.22205	-3.13428	-3.27834	-3.32109	-3.32191	-3.27732	-3.28825	-3.31458	-3.28764	-3.28542
hsa-miR-26a-1-3p	2.43e-05	0.00023796	1.15066	-3.08291	-3.10814	-3.01235	-3.03369	-3.07446	-3.09603	-3.22205	-3.13428	-3.27834	-3.32109	-3.32191	-3.27732	-3.28825	-3.31458	-3.28764	-3.28542
hsa-miR-26a-2-3p	2.43e-05	0.00023796	1.15066	-3.08291	-3.10814	-3.01235	-3.03369	-3.07446	-3.09603	-3.22205	-3.13428	-3.27834	-3.32109	-3.32191	-3.27732	-3.28825	-3.31458	-3.28764	-3.28542
hsa-miR-26a-5p	0.0593452	0.0860105	0.275455	-3.08291	-3.10814	-3.01235	-3.03369	-3.07446	-3.09603	-3.22205	-3.13428	-0.582683	-0.599926	-0.714654	0.0787163	-3.28825	-3.31458	-3.28764	-3.28542
hsa-miR-26b-3p	2.43e-05	0.00023796	1.15066	-3.08291	-3.10814	-3.01235	-3.03369	-3.07446	-3.09603	-3.22205	-3.13428	-3.27834	-3.32109	-3.32191	-3.27732	-3.28825	-3.31458	-3.28764	-3.28542
hsa-miR-26b-5p	0.0515556	0.0860105	0.165715	-3.08291	-3.10814	-3.01235	-3.03369	-3.07446	-3.09603	-3.22205	-3.13428	0.0787163	0.582132	0.0787163	0.709997	-3.28825	-3.31458	-3.28764	-3.28542
hsa-miR-27a-3p	0.0640175	0.0860105	0.0859482	-3.08291	-3.10814	-3.01235	-3.03369	-3.07446	-3.09603	-3.22205	-3.13428	0.554514	-0.481298	0.276023	2.8269	-3.28825	-3.31458	-3.28764	-3.28542
hsa-miR-27a-5p	2.43e-05	0.00023796	1.15066	-3.08291	-3.10814	-3.01235	-3.03369	-3.07446	-3.09603	-3.22205	-3.13428	-3.27834	-3.32109	-3.32191	-3.27732	-3.28825	-3.31458	-3.28764	-3.28542
hsa-miR-27b-3p	0.0536504	0.0860105	0.219778	-3.08291	-3.10814	-3.01235	-3.03369	-3.07446	-3.09603	-3.22205	-3.13428	-0.231738	-0.0352333	-0.106771	0.135307	-3.28825	-3.31458	-3.28764	-3.28542
hsa-miR-27b-5p	2.43e-05	0.00023796	1.15066	-3.08291	-3.10814	-3.01235	-3.03369	-3.07446	-3.09603	-3.22205	-3.13428	-3.27834	-3.32109	-3.32191	-3.27732	-3.28825	-3.31458	-3.28764	-3.28542
hsa-miR-28-3p	2.43e-05	0.00023796	1.15066	-3.08291	-3.10814	-3.01235	-3.03369	-3.07446	-3.09603	-3.22205	-3.13428	-3.27834	-3.32109	-3.32191	-3.27732	-3.28825	-3.31458	-3.28764	-3.28542
hsa-miR-28-5p	2.43e-05	0.00023796	1.15066	-3.08291	-3.10814	-3.01235	-3.03369	-3.07446	-3.09603	-3.22205	-3.13428	-3.27834	-3.32109	-3.32191	-3.27732	-3.28825	-3.31458	-3.28764	-3.28542
hsa-miR-2861	0.02813	0.0264997	0.471857	-3.08291	2.14251	-3.01235	-3.03369	-3.07446	4.35597	3.50579	4.66501	5.02553	3.56217	3.30968	3.56217	2.94923	4.66501	4.0874	3.94615
hsa-miR-2909	2.43e-05	0.00023796	1.15066	-3.08291	-3.10814	-3.01235	-3.03369	-3.07446	-3.09603	-3.22205	-3.13428	-3.27834	-3.32109	-3.32191	-3.27732	-3.28825	-3.31458	-3.28764	-3.28542
hsa-miR-296-3p	2.43e-05	0.00023796	1.15066	-3.08291	-3.10814	-3.01235	-3.03369	-3.07446	-3.09603	-3.22205	-3.13428	-3.27834	-3.32109	-3.32191	-3.27732	-3.28825	-3.31458	-3.28764	-3.28542
hsa-miR-296-5p	2.43e-05	0.00023796	1.15066	-3.08291	-3.10814	-3.01235	-3.03369	-3.07446	-3.09603	-3.22205	-3.13428	-3.27834	-3.32109	-3.32191	-3.27732	-3.28825	-3.31458	-3.28764	-3.28542
hsa-miR-2964a-3p	2.43e-05	0.00023796	1.15066	-3.08291	-3.10814	-3.01235	-3.03369	-3.07446	-3.09603	-3.22205	-3.13428	-3.27834	-3.32109	-3.32191	-3.27732	-3.28825	-3.31458	-3.28764	-3.28542
hsa-miR-2964a-5p	2.43e-05	0.00023796	1.15066	-3.08291	-3.10814	-3.01235	-3.03369	-3.07446	-3.09603	-3.22205	-3.13428	-3.27834	-3.32109	-3.32191	-3.27732	-3.28825	-3.31458	-3.28764	-3.28542
hsa-miR-297	2.43e-05	0.00023796	1.15066	-3.08291	-3.10814	-3.01235	-3.03369	-3.07446	-3.09603	-3.22205	-3.13428	-3.27834	-3.32109	-3.32191	-3.27732	-3.28825	-3.31458	-3.28764	-3.28542
hsa-miR-298	2.43e-05	0.00023796	1.15066	-3.08291	-3.10814	-3.01235	-3.03369	-3.07446	-3.09603	-3.22205	-3.13428	-3.27834	-3.32109	-3.32191	-3.27732	-3.28825	-3.31458	-3.28764	-3.28542
hsa-miR-299-3p	2.43e-05	0.00023796	1.15066	-3.08291	-3.10814	-3.01235	-3.03369	-3.07446	-3.09603	-3.22205	-3.13428	-3.27834	-3.32109	-3.32191	-3.27732	-3.28825	-3.31458	-3.28764	-3.28542
hsa-miR-299-5p	2.43e-05	0.00023796	1.15066	-3.08291	-3.10814	-3.01235	-3.03369	-3.07446	-3.09603	-3.22205	-3.13428	-3.27834	-3.32109	-3.32191	-3.27732	-3.28825	-3.31458	-3.28764	-3.28542
hsa-miR-29a-3p	0.0580431	0.0860105	0.094377	-3.08291	-3.10814	-3.01235	-3.03369	-3.07446	-3.09603	-3.22205	-3.13428	0.00774522	0.289442	0.53678	2.54588	-3.28825	-3.31458	-3.28764	-3.28542
hsa-miR-29a-5p	2.43e-05	0.00023796	1.15066	-3.08291	-3.10814	-3.01235	-3.03369	-3.07446	-3.09603	-3.22205	-3.13428	-3.27834	-3.32109	-3.32191	-3.27732	-3.28825	-3.31458	-3.28764	-3.28542
hsa-miR-29b-1-5p	2.43e-05	0.00023796	1.15066	-3.08291	-3.10814	-3.01235	-3.03369	-3.07446	-3.09603	-3.22205	-3.13428	-3.27834	-3.32109	-3.32191	-3.27732	-3.28825	-3.31458	-3.28764	-3.28542
hsa-miR-29b-2-5p	2.43e-05	0.00023796	1.15066	-3.08291	-3.10814	-3.01235	-3.03369	-3.07446	-3.09603	-3.22205	-3.13428	-3.27834	-3.32109	-3.32191	-3.27732	-3.28825	-3.31458	-3.28764	-3.28542
hsa-miR-29b-3p	0.0591635	0.0860105	0.238535	-3.08291	-3.10814	-3.01235	-3.03369	-3.07446	-3.09603	-3.22205	-3.13428	0.358231	-0.820963	-0.52384	-0.0352333	-3.28825	-3.31458	-3.28764	-3.28542
hsa-miR-29c-3p	0.0522851	0.0860105	0.146762	-3.08291	-3.10814	-3.01235	-3.03369	-3.07446	-3.09603	-3.22205	-3.13428	0.241488	0.110216	0.358231	1.28188	-3.28825	-3.31458	-3.28764	-3.28542
hsa-miR-29c-5p	2.43e-05	0.00023796	1.15066	-3.08291	-3.10814	-3.01235	-3.03369	-3.07446	-3.09603	-3.22205	-3.13428	-3.27834	-3.32109	-3.32191	-3.27732	-3.28825	-3.31458	-3.28764	-3.28542
hsa-miR-300	2.43e-05	0.00023796	1.15066	-3.08291	-3.10814	-3.01235	-3.03369	-3.07446	-3.09603	-3.22205	-3.13428	-3.27834	-3.32109	-3.32191	-3.27732	-3.28825	-3.31458	-3.28764	-3.28542
hsa-miR-301a-3p	2.43e-05	0.00023796	1.15066	-3.08291	-3.10814	-3.01235	-3.03369	-3.07446	-3.09603	-3.22205	-3.13428	-3.27834	-3.32109	-3.32191	-3.27732	-3.28825	-3.31458	-3.28764	-3.28542
hsa-miR-301a-5p	2.43e-05	0.00023796	1.15066	-3.08291	-3.10814	-3.01235	-3.03369	-3.07446	-3.09603	-3.22205	-3.13428	-3.27834	-3.32109	-3.32191	-3.27732	-3.28825	-3.31458	-3.28764	-3.28542
hsa-miR-301b	2.43e-05	0.00023796	1.15066	-3.08291	-3.10814	-3.01235	-3.03369	-3.07446	-3.09603	-3.22205	-3.13428	-3.27834	-3.32109	-3.32191	-3.27732	-3.28825	-3.31458	-3.28764	-3.28542
hsa-miR-302a-3p	2.43e-05	0.00023796	1.15066	-3.08291	-3.10814	-3.01235	-3.03369	-3.07446	-3.09603	-3.22205	-3.13428	-3.27834	-3.32109	-3.32191	-3.27732	-3.28825	-3.31458	-3.28764	-3.28542
hsa-miR-302a-5p	2.43e-05	0.00023796	1.15066	-3.08291	-3.10814	-3.01235	-3.03369	-3.07446	-3.09603	-3.22205	-3.13428	-3.27834	-3.32109	-3.32191	-3.27732	-3.28825	-3.31458	-3.28764	-3.28542
hsa-miR-302b-3p	2.43e-05	0.00023796	1.15066	-3.08291	-3.10814	-3.01235	-3.03369	-3.07446	-3.09603	-3.22205	-3.13428	-3.27834	-3.32109	-3.32191	-3.27732	-3.28825	-3.31458	-3.28764	-3.28542
hsa-miR-302b-5p	2.43e-05	0.00023796	1.15066	-3.08291	-3.10814	-3.01235	-3.03369	-3.07446	-3.09603	-3.22205	-3.13428	-3.27834	-3.32109	-3.32191	-3.27732	-3.28825	-3.31458	-3.28764	-3.28542
hsa-miR-302c-3p	2.43e-05	0.00023796	1.15066	-3.08291	-3.10814	-3.01235	-3.03369	-3.07446	-3.09603	-3.22205	-3.13428	-3.27834	-3.32109	-3.32191	-3.27732	-3.28825	-3.31458	-3.28764	-3.28542
hsa-miR-302c-5p	2.43e-05	0.00023796	1.15066	-3.08291	-3.10814	-3.01235	-3.03369	-3.07446	-3.09603	-3.22205	-3.13428	-3.27834	-3.32109	-3.32191	-3.27732	-3.28825	-3.31458	-3.28764	-3.28542
hsa-miR-302d-3p	2.43e-05	0.00023796	1.15066	-3.08291	-3.10814	-3.01235	-3.03369	-3.07446	-3.09603	-3.22205	-3.13428	-3.27834	-3.32109	-3.32191	-3.27732	-3.28825	-3.31458	-3.28764	-3.28542
hsa-miR-302d-5p	2.43e-05	0.00023796	1.15066	-3.08291	-3.10814	-3.01235	-3.03369	-3.07446	-3.09603	-3.22205	-3.13428	-3.27834	-3.32109	-3.32191	-3.27732	-3.28825	-3.31458	-3.28764	-3.28542
hsa-miR-302e	2.43e-05	0.00023796	1.15066	-3.08291	-3.10814	-3.01235	-3.03369	-3.07446	-3.09603	-3.22205	-3.13428	-3.27834	-3.32109	-3.32191	-3.27732	-3.28825	-3.31458	-3.28764	-3.28542
hsa-miR-302f	2.43e-05	0.00023796	1.15066	-3.08291	-3.10814	-3.01235	-3.03369	-3.07446	-3.09603	-3.22205	-3.13428	-3.27834	-3.32109	-3.32191	-3.27732	-3.28825	-3.31458	-3.28764	-3.28542
hsa-miR-3064-3p	2.43e-05	0.00023796	1.15066	-3.08291	-3.10814	-3.01235	-3.03369	-3.07446	-3.09603	-3.22205	-3.13428	-3.27834	-3.32109	-3.32191	-3.27732	-3.28825	-3.31458	-3.28764	-3.28542
hsa-miR-3064-5p	2.43e-05	0.00023796	1.15066	-3.08291	-3.10814	-3.01235	-3.03369	-3.07446	-3.09603	-3.22205	-3.13428	-3.27834	-3.32109	-3.32191	-3.27732	-3.28825	-3.31458	-3.28764	-3.28542
hsa-miR-3065-3p	2.43e-05	0.00023796	1.15066	-3.08291	-3.10814	-3.01235	-3.03369	-3.07446	-3.09603	-3.22205	-3.13428	-3.27834	-3.32109	-3.32191	-3.27732	-3.28825	-3.31458	-3.28764	-3.28542
hsa-miR-3065-5p	2.43e-05	0.00023796	1.15066	-3.08291	-3.10814	-3.01235	-3.03369	-3.07446	-3.09603	-3.22205	-3.13428	-3.27834	-3.32109	-3.32191	-3.27732	-3.28825	-3.31458	-3.28764	-3.28542
hsa-miR-3074-3p	2.43e-05	0.00023796	1.15066	-3.08291	-3.10814	-3.01235	-3.03369	-3.07446	-3.09603	-3.22205	-3.13428	-3.27834	-3.32109	-3.32191	-3.27732	-3.28825	-3.31458	-3.28764	-3.28542
hsa-miR-3074-5p	2.43e-05	0.00023796	1.15066	-3.08291	-3.10814	-3.01235	-3.03369	-3.07446	-3.09603	-3.22205	-3.13428	-3.27834	-3.32109	-3.32191	-3.27732	-3.28825	-3.31458	-3.28764	-3.28542
hsa-miR-30a-3p	2.43e-05	0.00023796	1.15066	-3.08291	-3.10814	-3.01235	-3.03369	-3.07446	-3.09603	-3.22205	-3.13428	-3.27834	-3.32109	-3.32191	-3.27732	-3.28825	-3.31458	-3.28764	-3.28542
hsa-miR-30a-5p	2.43e-05	0.00023796	1.15066	-3.08291	-3.10814	-3.01235	-3.03369	-3.07446	-3.09603	-3.22205	-3.13428	-3.27834	-3.32109	-3.32191	-3.27732	-3.28825	-3.31458	-3.28764	-3.28542
hsa-miR-30b-3p	2.43e-05	0.00023796	1.15066	-3.08291	-3.10814	-3.01235	-3.03369	-3.07446	-3.09603	-3.22205	-3.13428	-3.27834	-3.32109	-3.32191	-3.27732	-3.28825	-3.31458	-3.28764	-3.28542
hsa-miR-30b-5p	0.193726	0.262339	0.503294	-3.08291	-3.10814	-3.01235	-3.03369	-3.07446	-3.09603	-3.22205	-3.13428	-1.13343	-2.8618	-2.60375	-0.52384	-3.28825	-3.31458	-3.28764	-3.28542
hsa-miR-30c-1-3p	2.43e-05	0.00023796	1.15066	-3.08291	-3.10814	-3.01235	-3.03369	-3.07446	-3.09603	-3.22205	-3.13428	-3.27834	-3.32109	-3.32191	-3.27732	-3.28825	-3.31458	-3.28764	-3.28542
hsa-miR-30c-2-3p	2.43e-05	0.00023796	1.15066	-3.08291	-3.10814	-3.01235	-3.03369	-3.07446	-3.09603	-3.22205	-3.13428	-3.27834	-3.32109	-3.32191	-3.27732	-3.28825	-3.31458	-3.28764	-3.28542
hsa-miR-30c-5p	0.624892	0.994449	0.718678	-3.08291	-3.10814	-3.01235	-3.03369	-3.07446	-3.09603	-3.22205	-3.13428	-3.27834	-3.32109	-2.90278	-0.839665	-3.28825	-3.31458	-3.28764	-3.28542
hsa-miR-30d-3p	2.43e-05	0.00023796	1.15066	-3.08291	-3.10814	-3.01235	-3.03369	-3.07446	-3.09603	-3.22205	-3.13428	-3.27834	-3.32109	-3.32191	-3.27732	-3.28825	-3.31458	-3.28764	-3.28542
hsa-miR-30d-5p	0.791953	0.994449	0.879053	-3.08291	-3.10814	-3.01235	-3.03369	-3.07446	-3.09603	-3.22205	-3.13428	-3.27834	-2.90307	-3.32191	-3.27732	-3.28825	-3.31458	-1.64242	-3.28542
hsa-miR-30e-3p	2.43e-05	0.00023796	1.15066	-3.08291	-3.10814	-3.01235	-3.03369	-3.07446	-3.09603	-3.22205	-3.13428	-3.27834	-3.32109	-3.32191	-3.27732	-3.28825	-3.31458	-3.28764	-3.28542
hsa-miR-30e-5p	0.156944	0.16257	0.468297	-3.08291	-3.10814	-3.01235	-3.03369	-3.07446	-3.09603	-3.22205	-3.13428	-0.883827	-2.53042	-2.55138	-0.500397	-3.28825	-3.31458	-3.28764	-3.28542
hsa-miR-31-3p	2.43e-05	0.00023796	1.15066	-3.08291	-3.10814	-3.01235	-3.03369	-3.07446	-3.09603	-3.22205	-3.13428	-3.27834	-3.32109	-3.32191	-3.27732	-3.28825	-3.31458	-3.28764	-3.28542
hsa-miR-31-5p	2.43e-05	0.00023796	1.15066	-3.08291	-3.10814	-3.01235	-3.03369	-3.07446	-3.09603	-3.22205	-3.13428	-3.27834	-3.32109	-3.32191	-3.27732	-3.28825	-3.31458	-3.28764	-3.28542
hsa-miR-3115	2.43e-05	0.00023796	1.15066	-3.08291	-3.10814	-3.01235	-3.03369	-3.07446	-3.09603	-3.22205	-3.13428	-3.27834	-3.32109	-3.32191	-3.27732	-3.28825	-3.31458	-3.28764	-3.28542
hsa-miR-3116	2.43e-05	0.00023796	1.15066	-3.08291	-3.10814	-3.01235	-3.03369	-3.07446	-3.09603	-3.22205	-3.13428	-3.27834	-3.32109	-3.32191	-3.27732	-3.28825	-3.31458	-3.28764	-3.28542
hsa-miR-3117-3p	2.43e-05	0.00023796	1.15066	-3.08291	-3.10814	-3.01235	-3.03369	-3.07446	-3.09603	-3.22205	-3.13428	-3.27834	-3.32109	-3.32191	-3.27732	-3.28825	-3.31458	-3.28764	-3.28542
hsa-miR-3117-5p	2.43e-05	0.00023796	1.15066	-3.08291	-3.10814	-3.01235	-3.03369	-3.07446	-3.09603	-3.22205	-3.13428	-3.27834	-3.32109	-3.32191	-3.27732	-3.28825	-3.31458	-3.28764	-3.28542
hsa-miR-3118	2.43e-05	0.00023796	1.15066	-3.08291	-3.10814	-3.01235	-3.03369	-3.07446	-3.09603	-3.22205	-3.13428	-3.27834	-3.32109	-3.32191	-3.27732	-3.28825	-3.31458	-3.28764	-3.28542
hsa-miR-3119	2.43e-05	0.00023796	1.15066	-3.08291	-3.10814	-3.01235	-3.03369	-3.07446	-3.09603	-3.22205	-3.13428	-3.27834	-3.32109	-3.32191	-3.27732	-3.28825	-3.31458	-3.28764	-3.28542
hsa-miR-3120-3p	2.43e-05	0.00023796	1.15066	-3.08291	-3.10814	-3.01235	-3.03369	-3.07446	-3.09603	-3.22205	-3.13428	-3.27834	-3.32109	-3.32191	-3.27732	-3.28825	-3.31458	-3.28764	-3.28542
hsa-miR-3120-5p	2.43e-05	0.00023796	1.15066	-3.08291	-3.10814	-3.01235	-3.03369	-3.07446	-3.09603	-3.22205	-3.13428	-3.27834	-3.32109	-3.32191	-3.27732	-3.28825	-3.31458	-3.28764	-3.28542
hsa-miR-3121-3p	2.43e-05	0.00023796	1.15066	-3.08291	-3.10814	-3.01235	-3.03369	-3.07446	-3.09603	-3.22205	-3.13428	-3.27834	-3.32109	-3.32191	-3.27732	-3.28825	-3.31458	-3.28764	-3.28542
hsa-miR-3121-5p	2.43e-05	0.00023796	1.15066	-3.08291	-3.10814	-3.01235	-3.03369	-3.07446	-3.09603	-3.22205	-3.13428	-3.27834	-3.32109	-3.32191	-3.27732	-3.28825	-3.31458	-3.28764	-3.28542
hsa-miR-3122	2.43e-05	0.00023796	1.15066	-3.08291	-3.10814	-3.01235	-3.03369	-3.07446	-3.09603	-3.22205	-3.13428	-3.27834	-3.32109	-3.32191	-3.27732	-3.28825	-3.31458	-3.28764	-3.28542
hsa-miR-3123	2.43e-05	0.00023796	1.15066	-3.08291	-3.10814	-3.01235	-3.03369	-3.07446	-3.09603	-3.22205	-3.13428	-3.27834	-3.32109	-3.32191	-3.27732	-3.28825	-3.31458	-3.28764	-3.28542
hsa-miR-3124-3p	2.43e-05	0.00023796	1.15066	-3.08291	-3.10814	-3.01235	-3.03369	-3.07446	-3.09603	-3.22205	-3.13428	-3.27834	-3.32109	-3.32191	-3.27732	-3.28825	-3.31458	-3.28764	-3.28542
hsa-miR-3124-5p	2.43e-05	0.00023796	1.15066	-3.08291	-3.10814	-3.01235	-3.03369	-3.07446	-3.09603	-3.22205	-3.13428	-3.27834	-3.32109	-3.32191	-3.27732	-3.28825	-3.31458	-3.28764	-3.28542
hsa-miR-3125	2.43e-05	0.00023796	1.15066	-3.08291	-3.10814	-3.01235	-3.03369	-3.07446	-3.09603	-3.22205	-3.13428	-3.27834	-3.32109	-3.32191	-3.27732	-3.28825	-3.31458	-3.28764	-3.28542
hsa-miR-3126-3p	2.43e-05	0.00023796	1.15066	-3.08291	-3.10814	-3.01235	-3.03369	-3.07446	-3.09603	-3.22205	-3.13428	-3.27834	-3.32109	-3.32191	-3.27732	-3.28825	-3.31458	-3.28764	-3.28542
hsa-miR-3126-5p	2.43e-05	0.00023796	1.15066	-3.08291	-3.10814	-3.01235	-3.03369	-3.07446	-3.09603	-3.22205	-3.13428	-3.27834	-3.32109	-3.32191	-3.27732	-3.28825	-3.31458	-3.28764	-3.28542
hsa-miR-3127-3p	2.43e-05	0.00023796	1.15066	-3.08291	-3.10814	-3.01235	-3.03369	-3.07446	-3.09603	-3.22205	-3.13428	-3.27834	-3.32109	-3.32191	-3.27732	-3.28825	-3.31458	-3.28764	-3.28542
hsa-miR-3127-5p	2.43e-05	0.00023796	1.15066	-3.08291	-3.10814	-3.01235	-3.03369	-3.07446	-3.09603	-3.22205	-3.13428	-3.27834	-3.32109	-3.32191	-3.27732	-3.28825	-3.31458	-3.28764	-3.28542
hsa-miR-3128	2.43e-05	0.00023796	1.15066	-3.08291	-3.10814	-3.01235	-3.03369	-3.07446	-3.09603	-3.22205	-3.13428	-3.27834	-3.32109	-3.32191	-3.27732	-3.28825	-3.31458	-3.28764	-3.28542
hsa-miR-3129-3p	2.43e-05	0.00023796	1.15066	-3.08291	-3.10814	-3.01235	-3.03369	-3.07446	-3.09603	-3.22205	-3.13428	-3.27834	-3.32109	-3.32191	-3.27732	-3.28825	-3.31458	-3.28764	-3.28542
hsa-miR-3129-5p	2.43e-05	0.00023796	1.15066	-3.08291	-3.10814	-3.01235	-3.03369	-3.07446	-3.09603	-3.22205	-3.13428	-3.27834	-3.32109	-3.32191	-3.27732	-3.28825	-3.31458	-3.28764	-3.28542
hsa-miR-3130-3p	2.43e-05	0.00023796	1.15066	-3.08291	-3.10814	-3.01235	-3.03369	-3.07446	-3.09603	-3.22205	-3.13428	-3.27834	-3.32109	-3.32191	-3.27732	-3.28825	-3.31458	-3.28764	-3.28542
hsa-miR-3130-5p	2.43e-05	0.00023796	1.15066	-3.08291	-3.10814	-3.01235	-3.03369	-3.07446	-3.09603	-3.22205	-3.13428	-3.27834	-3.32109	-3.32191	-3.27732	-3.28825	-3.31458	-3.28764	-3.28542
hsa-miR-3131	2.43e-05	0.00023796	1.15066	-3.08291	-3.10814	-3.01235	-3.03369	-3.07446	-3.09603	-3.22205	-3.13428	-3.27834	-3.32109	-3.32191	-3.27732	-3.28825	-3.31458	-3.28764	-3.28542
hsa-miR-3132	2.43e-05	0.00023796	1.15066	-3.08291	-3.10814	-3.01235	-3.03369	-3.07446	-3.09603	-3.22205	-3.13428	-3.27834	-3.32109	-3.32191	-3.27732	-3.28825	-3.31458	-3.28764	-3.28542
hsa-miR-3133	2.43e-05	0.00023796	1.15066	-3.08291	-3.10814	-3.01235	-3.03369	-3.07446	-3.09603	-3.22205	-3.13428	-3.27834	-3.32109	-3.32191	-3.27732	-3.28825	-3.31458	-3.28764	-3.28542
hsa-miR-3134	2.43e-05	0.00023796	1.15066	-3.08291	-3.10814	-3.01235	-3.03369	-3.07446	-3.09603	-3.22205	-3.13428	-3.27834	-3.32109	-3.32191	-3.27732	-3.28825	-3.31458	-3.28764	-3.28542
hsa-miR-3135a	2.43e-05	0.00023796	1.15066	-3.08291	-3.10814	-3.01235	-3.03369	-3.07446	-3.09603	-3.22205	-3.13428	-3.27834	-3.32109	-3.32191	-3.27732	-3.28825	-3.31458	-3.28764	-3.28542
hsa-miR-3135b	0.000590982	0.00146981	0.109582	-3.08291	-3.10814	-3.01235	-3.03369	-3.07446	-3.09603	-3.22205	-3.13428	-3.27834	-0.215514	-0.582683	0.53678	-0.536773	1.1931	0.204696	0.419577
hsa-miR-3136-3p	2.43e-05	0.00023796	1.15066	-3.08291	-3.10814	-3.01235	-3.03369	-3.07446	-3.09603	-3.22205	-3.13428	-3.27834	-3.32109	-3.32191	-3.27732	-3.28825	-3.31458	-3.28764	-3.28542
hsa-miR-3136-5p	2.43e-05	0.00023796	1.15066	-3.08291	-3.10814	-3.01235	-3.03369	-3.07446	-3.09603	-3.22205	-3.13428	-3.27834	-3.32109	-3.32191	-3.27732	-3.28825	-3.31458	-3.28764	-3.28542
hsa-miR-3137	0.19389	0.215891	0.418924	-3.08291	-3.10814	-3.01235	-3.03369	-3.07446	-3.09603	-3.22205	-3.13428	-3.27834	-3.32109	-3.01848	-3.27732	0.0522754	-2.39389	-1.06881	-3.28542
hsa-miR-3138	0.681608	1	0.661777	-3.08291	-3.10814	-3.01235	-3.03369	-3.07446	-3.09603	-3.22205	-3.13428	-3.27834	-3.32109	-3.32191	-3.27732	-3.28825	-0.510604	-3.28764	-3.28542
hsa-miR-3139	2.43e-05	0.00023796	1.15066	-3.08291	-3.10814	-3.01235	-3.03369	-3.07446	-3.09603	-3.22205	-3.13428	-3.27834	-3.32109	-3.32191	-3.27732	-3.28825	-3.31458	-3.28764	-3.28542
hsa-miR-3140-3p	2.43e-05	0.00023796	1.15066	-3.08291	-3.10814	-3.01235	-3.03369	-3.07446	-3.09603	-3.22205	-3.13428	-3.27834	-3.32109	-3.32191	-3.27732	-3.28825	-3.31458	-3.28764	-3.28542
hsa-miR-3140-5p	2.43e-05	0.00023796	1.15066	-3.08291	-3.10814	-3.01235	-3.03369	-3.07446	-3.09603	-3.22205	-3.13428	-3.27834	-3.32109	-3.32191	-3.27732	-3.28825	-3.31458	-3.28764	-3.28542
hsa-miR-3141	0.0119973	0.028714	0.22822	-3.08291	-3.10814	-3.01235	-3.03369	-3.07446	-3.09603	0.110216	-3.13428	-3.27834	-0.0733799	0.184418	-3.27732	0.313855	0.313855	0.999929	0.665169
hsa-miR-3142	2.43e-05	0.00023796	1.15066	-3.08291	-3.10814	-3.01235	-3.03369	-3.07446	-3.09603	-3.22205	-3.13428	-3.27834	-3.32109	-3.32191	-3.27732	-3.28825	-3.31458	-3.28764	-3.28542
hsa-miR-3143	2.43e-05	0.00023796	1.15066	-3.08291	-3.10814	-3.01235	-3.03369	-3.07446	-3.09603	-3.22205	-3.13428	-3.27834	-3.32109	-3.32191	-3.27732	-3.28825	-3.31458	-3.28764	-3.28542
hsa-miR-3144-3p	2.43e-05	0.00023796	1.15066	-3.08291	-3.10814	-3.01235	-3.03369	-3.07446	-3.09603	-3.22205	-3.13428	-3.27834	-3.32109	-3.32191	-3.27732	-3.28825	-3.31458	-3.28764	-3.28542
hsa-miR-3144-5p	2.43e-05	0.00023796	1.15066	-3.08291	-3.10814	-3.01235	-3.03369	-3.07446	-3.09603	-3.22205	-3.13428	-3.27834	-3.32109	-3.32191	-3.27732	-3.28825	-3.31458	-3.28764	-3.28542
hsa-miR-3145-3p	2.43e-05	0.00023796	1.15066	-3.08291	-3.10814	-3.01235	-3.03369	-3.07446	-3.09603	-3.22205	-3.13428	-3.27834	-3.32109	-3.32191	-3.27732	-3.28825	-3.31458	-3.28764	-3.28542
hsa-miR-3145-5p	2.43e-05	0.00023796	1.15066	-3.08291	-3.10814	-3.01235	-3.03369	-3.07446	-3.09603	-3.22205	-3.13428	-3.27834	-3.32109	-3.32191	-3.27732	-3.28825	-3.31458	-3.28764	-3.28542
hsa-miR-3146	2.43e-05	0.00023796	1.15066	-3.08291	-3.10814	-3.01235	-3.03369	-3.07446	-3.09603	-3.22205	-3.13428	-3.27834	-3.32109	-3.32191	-3.27732	-3.28825	-3.31458	-3.28764	-3.28542
hsa-miR-3147	0.319253	0.379512	1.05722	-3.08291	-3.10814	-3.01235	-3.03369	-3.07446	-3.09603	-3.22205	-3.13428	-3.27834	-3.32109	-3.32191	-3.27732	-3.28825	-2.53561	-3.28764	-3.28542
hsa-miR-3148	2.43e-05	0.00023796	1.15066	-3.08291	-3.10814	-3.01235	-3.03369	-3.07446	-3.09603	-3.22205	-3.13428	-3.27834	-3.32109	-3.32191	-3.27732	-3.28825	-3.31458	-3.28764	-3.28542
hsa-miR-3149	0.775369	1	0.778591	-3.08291	-3.10814	-3.01235	-3.03369	-3.07446	-3.09603	-3.22205	-3.13428	-3.27834	-3.32109	-3.32191	-3.27732	-3.28825	-1.03046	-3.28764	-3.28542
hsa-miR-3150a-3p	2.43e-05	0.00023796	1.15066	-3.08291	-3.10814	-3.01235	-3.03369	-3.07446	-3.09603	-3.22205	-3.13428	-3.27834	-3.32109	-3.32191	-3.27732	-3.28825	-3.31458	-3.28764	-3.28542
hsa-miR-3150a-5p	2.43e-05	0.00023796	1.15066	-3.08291	-3.10814	-3.01235	-3.03369	-3.07446	-3.09603	-3.22205	-3.13428	-3.27834	-3.32109	-3.32191	-3.27732	-3.28825	-3.31458	-3.28764	-3.28542
hsa-miR-3150b-3p	2.43e-05	0.00023796	1.15066	-3.08291	-3.10814	-3.01235	-3.03369	-3.07446	-3.09603	-3.22205	-3.13428	-3.27834	-3.32109	-3.32191	-3.27732	-3.28825	-3.31458	-3.28764	-3.28542
hsa-miR-3150b-5p	2.43e-05	0.00023796	1.15066	-3.08291	-3.10814	-3.01235	-3.03369	-3.07446	-3.09603	-3.22205	-3.13428	-3.27834	-3.32109	-3.32191	-3.27732	-3.28825	-3.31458	-3.28764	-3.28542
hsa-miR-3151	2.43e-05	0.00023796	1.15066	-3.08291	-3.10814	-3.01235	-3.03369	-3.07446	-3.09603	-3.22205	-3.13428	-3.27834	-3.32109	-3.32191	-3.27732	-3.28825	-3.31458	-3.28764	-3.28542
hsa-miR-3152-3p	2.43e-05	0.00023796	1.15066	-3.08291	-3.10814	-3.01235	-3.03369	-3.07446	-3.09603	-3.22205	-3.13428	-3.27834	-3.32109	-3.32191	-3.27732	-3.28825	-3.31458	-3.28764	-3.28542
hsa-miR-3152-5p	2.43e-05	0.00023796	1.15066	-3.08291	-3.10814	-3.01235	-3.03369	-3.07446	-3.09603	-3.22205	-3.13428	-3.27834	-3.32109	-3.32191	-3.27732	-3.28825	-3.31458	-3.28764	-3.28542
hsa-miR-3153	2.43e-05	0.00023796	1.15066	-3.08291	-3.10814	-3.01235	-3.03369	-3.07446	-3.09603	-3.22205	-3.13428	-3.27834	-3.32109	-3.32191	-3.27732	-3.28825	-3.31458	-3.28764	-3.28542
hsa-miR-3154	2.43e-05	0.00023796	1.15066	-3.08291	-3.10814	-3.01235	-3.03369	-3.07446	-3.09603	-3.22205	-3.13428	-3.27834	-3.32109	-3.32191	-3.27732	-3.28825	-3.31458	-3.28764	-3.28542
hsa-miR-3155a	2.43e-05	0.00023796	1.15066	-3.08291	-3.10814	-3.01235	-3.03369	-3.07446	-3.09603	-3.22205	-3.13428	-3.27834	-3.32109	-3.32191	-3.27732	-3.28825	-3.31458	-3.28764	-3.28542
hsa-miR-3155b	2.43e-05	0.00023796	1.15066	-3.08291	-3.10814	-3.01235	-3.03369	-3.07446	-3.09603	-3.22205	-3.13428	-3.27834	-3.32109	-3.32191	-3.27732	-3.28825	-3.31458	-3.28764	-3.28542
hsa-miR-3156-3p	2.43e-05	0.00023796	1.15066	-3.08291	-3.10814	-3.01235	-3.03369	-3.07446	-3.09603	-3.22205	-3.13428	-3.27834	-3.32109	-3.32191	-3.27732	-3.28825	-3.31458	-3.28764	-3.28542
hsa-miR-3156-5p	0.000557735	0.00146981	0.11463	-3.08291	-3.10814	-3.01235	-3.03369	-3.07446	-3.09603	-3.22205	-3.13428	-3.27834	0.53678	0.747469	0.217976	0.402063	-0.913735	0.289442	-0.510604
hsa-miR-3157-3p	2.43e-05	0.00023796	1.15066	-3.08291	-3.10814	-3.01235	-3.03369	-3.07446	-3.09603	-3.22205	-3.13428	-3.27834	-3.32109	-3.32191	-3.27732	-3.28825	-3.31458	-3.28764	-3.28542
hsa-miR-3157-5p	2.43e-05	0.00023796	1.15066	-3.08291	-3.10814	-3.01235	-3.03369	-3.07446	-3.09603	-3.22205	-3.13428	-3.27834	-3.32109	-3.32191	-3.27732	-3.28825	-3.31458	-3.28764	-3.28542
hsa-miR-3158-3p	2.43e-05	0.00023796	1.15066	-3.08291	-3.10814	-3.01235	-3.03369	-3.07446	-3.09603	-3.22205	-3.13428	-3.27834	-3.32109	-3.32191	-3.27732	-3.28825	-3.31458	-3.28764	-3.28542
hsa-miR-3158-5p	0.267637	0.302009	1.06381	-3.08291	-3.10814	-3.01235	-3.03369	-3.07446	-3.09603	-3.22205	-3.13428	-3.27834	-3.32109	-3.32191	-3.27732	-3.28825	-2.5823	-3.28764	-3.28542
hsa-miR-3159	2.43e-05	0.00023796	1.15066	-3.08291	-3.10814	-3.01235	-3.03369	-3.07446	-3.09603	-3.22205	-3.13428	-3.27834	-3.32109	-3.32191	-3.27732	-3.28825	-3.31458	-3.28764	-3.28542
hsa-miR-3160-3p	2.43e-05	0.00023796	1.15066	-3.08291	-3.10814	-3.01235	-3.03369	-3.07446	-3.09603	-3.22205	-3.13428	-3.27834	-3.32109	-3.32191	-3.27732	-3.28825	-3.31458	-3.28764	-3.28542
hsa-miR-3160-5p	2.43e-05	0.00023796	1.15066	-3.08291	-3.10814	-3.01235	-3.03369	-3.07446	-3.09603	-3.22205	-3.13428	-3.27834	-3.32109	-3.32191	-3.27732	-3.28825	-3.31458	-3.28764	-3.28542
hsa-miR-3161	2.43e-05	0.00023796	1.15066	-3.08291	-3.10814	-3.01235	-3.03369	-3.07446	-3.09603	-3.22205	-3.13428	-3.27834	-3.32109	-3.32191	-3.27732	-3.28825	-3.31458	-3.28764	-3.28542
hsa-miR-3162-3p	0.0105075	0.00682273	228.302	5.53619	3.87116	7.29293	7.75402	2.86355	-3.09603	1.05464	-3.13428	-0.78939	-2.90307	-2.89161	-1.09583	-3.28825	-3.31458	-3.28764	-1.63667
hsa-miR-3162-5p	0.314122	0.305649	1.441	2.70544	-3.10814	-3.01235	-3.03369	5.53619	2.47753	3.60188	3.50579	2.22739	1.76003	2.0349	0.582132	4.2657	2.94923	3.02036	3.07327
hsa-miR-3163	2.43e-05	0.00023796	1.15066	-3.08291	-3.10814	-3.01235	-3.03369	-3.07446	-3.09603	-3.22205	-3.13428	-3.27834	-3.32109	-3.32191	-3.27732	-3.28825	-3.31458	-3.28764	-3.28542
hsa-miR-3164	2.43e-05	0.00023796	1.15066	-3.08291	-3.10814	-3.01235	-3.03369	-3.07446	-3.09603	-3.22205	-3.13428	-3.27834	-3.32109	-3.32191	-3.27732	-3.28825	-3.31458	-3.28764	-3.28542
hsa-miR-3165	2.43e-05	0.00023796	1.15066	-3.08291	-3.10814	-3.01235	-3.03369	-3.07446	-3.09603	-3.22205	-3.13428	-3.27834	-3.32109	-3.32191	-3.27732	-3.28825	-3.31458	-3.28764	-3.28542
hsa-miR-3166	2.43e-05	0.00023796	1.15066	-3.08291	-3.10814	-3.01235	-3.03369	-3.07446	-3.09603	-3.22205	-3.13428	-3.27834	-3.32109	-3.32191	-3.27732	-3.28825	-3.31458	-3.28764	-3.28542
hsa-miR-3167	2.43e-05	0.00023796	1.15066	-3.08291	-3.10814	-3.01235	-3.03369	-3.07446	-3.09603	-3.22205	-3.13428	-3.27834	-3.32109	-3.32191	-3.27732	-3.28825	-3.31458	-3.28764	-3.28542
hsa-miR-3168	2.43e-05	0.00023796	1.15066	-3.08291	-3.10814	-3.01235	-3.03369	-3.07446	-3.09603	-3.22205	-3.13428	-3.27834	-3.32109	-3.32191	-3.27732	-3.28825	-3.31458	-3.28764	-3.28542
hsa-miR-3169	2.43e-05	0.00023796	1.15066	-3.08291	-3.10814	-3.01235	-3.03369	-3.07446	-3.09603	-3.22205	-3.13428	-3.27834	-3.32109	-3.32191	-3.27732	-3.28825	-3.31458	-3.28764	-3.28542
hsa-miR-3170	2.43e-05	0.00023796	1.15066	-3.08291	-3.10814	-3.01235	-3.03369	-3.07446	-3.09603	-3.22205	-3.13428	-3.27834	-3.32109	-3.32191	-3.27732	-3.28825	-3.31458	-3.28764	-3.28542
hsa-miR-3171	2.43e-05	0.00023796	1.15066	-3.08291	-3.10814	-3.01235	-3.03369	-3.07446	-3.09603	-3.22205	-3.13428	-3.27834	-3.32109	-3.32191	-3.27732	-3.28825	-3.31458	-3.28764	-3.28542
hsa-miR-3173-3p	2.43e-05	0.00023796	1.15066	-3.08291	-3.10814	-3.01235	-3.03369	-3.07446	-3.09603	-3.22205	-3.13428	-3.27834	-3.32109	-3.32191	-3.27732	-3.28825	-3.31458	-3.28764	-3.28542
hsa-miR-3173-5p	2.43e-05	0.00023796	1.15066	-3.08291	-3.10814	-3.01235	-3.03369	-3.07446	-3.09603	-3.22205	-3.13428	-3.27834	-3.32109	-3.32191	-3.27732	-3.28825	-3.31458	-3.28764	-3.28542
hsa-miR-3174	2.43e-05	0.00023796	1.15066	-3.08291	-3.10814	-3.01235	-3.03369	-3.07446	-3.09603	-3.22205	-3.13428	-3.27834	-3.32109	-3.32191	-3.27732	-3.28825	-3.31458	-3.28764	-3.28542
hsa-miR-3175	2.43e-05	0.00023796	1.15066	-3.08291	-3.10814	-3.01235	-3.03369	-3.07446	-3.09603	-3.22205	-3.13428	-3.27834	-3.32109	-3.32191	-3.27732	-3.28825	-3.31458	-3.28764	-3.28542
hsa-miR-3176	2.43e-05	0.00023796	1.15066	-3.08291	-3.10814	-3.01235	-3.03369	-3.07446	-3.09603	-3.22205	-3.13428	-3.27834	-3.32109	-3.32191	-3.27732	-3.28825	-3.31458	-3.28764	-3.28542
hsa-miR-3177-3p	2.43e-05	0.00023796	1.15066	-3.08291	-3.10814	-3.01235	-3.03369	-3.07446	-3.09603	-3.22205	-3.13428	-3.27834	-3.32109	-3.32191	-3.27732	-3.28825	-3.31458	-3.28764	-3.28542
hsa-miR-3177-5p	2.43e-05	0.00023796	1.15066	-3.08291	-3.10814	-3.01235	-3.03369	-3.07446	-3.09603	-3.22205	-3.13428	-3.27834	-3.32109	-3.32191	-3.27732	-3.28825	-3.31458	-3.28764	-3.28542
hsa-miR-3178	2.43e-05	0.00023796	1.15066	-3.08291	-3.10814	-3.01235	-3.03369	-3.07446	-3.09603	-3.22205	-3.13428	-3.27834	-3.32109	-3.32191	-3.27732	-3.28825	-3.31458	-3.28764	-3.28542
hsa-miR-3179	2.43e-05	0.00023796	1.15066	-3.08291	-3.10814	-3.01235	-3.03369	-3.07446	-3.09603	-3.22205	-3.13428	-3.27834	-3.32109	-3.32191	-3.27732	-3.28825	-3.31458	-3.28764	-3.28542
hsa-miR-3180	0.784251	1	0.786992	-3.08291	-3.10814	-3.01235	-3.03369	-3.07446	-3.09603	-3.22205	-3.13428	-3.27834	-3.32109	-3.32191	-3.27732	-3.28825	-1.06881	-3.28764	-3.28542
hsa-miR-3180-3p	2.43e-05	0.00023796	1.15066	-3.08291	-3.10814	-3.01235	-3.03369	-3.07446	-3.09603	-3.22205	-3.13428	-3.27834	-3.32109	-3.32191	-3.27732	-3.28825	-3.31458	-3.28764	-3.28542
hsa-miR-3180-5p	0.153736	0.00023796	2.12155	-3.08291	-3.10814	-3.01235	-3.03369	-3.07446	-3.09603	-0.155896	-3.13428	-3.27834	-3.32109	-3.32191	-3.27732	-3.28825	-3.31458	-3.28764	-3.28542
hsa-miR-3181	2.43e-05	0.00023796	1.15066	-3.08291	-3.10814	-3.01235	-3.03369	-3.07446	-3.09603	-3.22205	-3.13428	-3.27834	-3.32109	-3.32191	-3.27732	-3.28825	-3.31458	-3.28764	-3.28542
hsa-miR-3182	2.43e-05	0.00023796	1.15066	-3.08291	-3.10814	-3.01235	-3.03369	-3.07446	-3.09603	-3.22205	-3.13428	-3.27834	-3.32109	-3.32191	-3.27732	-3.28825	-3.31458	-3.28764	-3.28542
hsa-miR-3183	2.43e-05	0.00023796	1.15066	-3.08291	-3.10814	-3.01235	-3.03369	-3.07446	-3.09603	-3.22205	-3.13428	-3.27834	-3.32109	-3.32191	-3.27732	-3.28825	-3.31458	-3.28764	-3.28542
hsa-miR-3184-3p	2.43e-05	0.00023796	1.15066	-3.08291	-3.10814	-3.01235	-3.03369	-3.07446	-3.09603	-3.22205	-3.13428	-3.27834	-3.32109	-3.32191	-3.27732	-3.28825	-3.31458	-3.28764	-3.28542
hsa-miR-3184-5p	2.43e-05	0.00023796	1.15066	-3.08291	-3.10814	-3.01235	-3.03369	-3.07446	-3.09603	-3.22205	-3.13428	-3.27834	-3.32109	-3.32191	-3.27732	-3.28825	-3.31458	-3.28764	-3.28542
hsa-miR-3185	2.43e-05	0.00023796	1.15066	-3.08291	-3.10814	-3.01235	-3.03369	-3.07446	-3.09603	-3.22205	-3.13428	-3.27834	-3.32109	-3.32191	-3.27732	-3.28825	-3.31458	-3.28764	-3.28542
hsa-miR-3186-3p	2.43e-05	0.00023796	1.15066	-3.08291	-3.10814	-3.01235	-3.03369	-3.07446	-3.09603	-3.22205	-3.13428	-3.27834	-3.32109	-3.32191	-3.27732	-3.28825	-3.31458	-3.28764	-3.28542
hsa-miR-3186-5p	2.43e-05	0.00023796	1.15066	-3.08291	-3.10814	-3.01235	-3.03369	-3.07446	-3.09603	-3.22205	-3.13428	-3.27834	-3.32109	-3.32191	-3.27732	-3.28825	-3.31458	-3.28764	-3.28542
hsa-miR-3187-3p	2.43e-05	0.00023796	1.15066	-3.08291	-3.10814	-3.01235	-3.03369	-3.07446	-3.09603	-3.22205	-3.13428	-3.27834	-3.32109	-3.32191	-3.27732	-3.28825	-3.31458	-3.28764	-3.28542
hsa-miR-3187-5p	2.43e-05	0.00023796	1.15066	-3.08291	-3.10814	-3.01235	-3.03369	-3.07446	-3.09603	-3.22205	-3.13428	-3.27834	-3.32109	-3.32191	-3.27732	-3.28825	-3.31458	-3.28764	-3.28542
hsa-miR-3188	0.00283596	0.00141517	0.253801	-3.08291	-3.10814	-3.01235	-3.03369	-3.07446	-3.09603	-3.22205	-3.13428	-0.839665	-1.68526	-2.41823	-3.27732	-1.67955	-0.801346	-0.106771	-0.481298
hsa-miR-3189-3p	2.43e-05	0.00023796	1.15066	-3.08291	-3.10814	-3.01235	-3.03369	-3.07446	-3.09603	-3.22205	-3.13428	-3.27834	-3.32109	-3.32191	-3.27732	-3.28825	-3.31458	-3.28764	-3.28542
hsa-miR-3189-5p	2.43e-05	0.00023796	1.15066	-3.08291	-3.10814	-3.01235	-3.03369	-3.07446	-3.09603	-3.22205	-3.13428	-3.27834	-3.32109	-3.32191	-3.27732	-3.28825	-3.31458	-3.28764	-3.28542
hsa-miR-3190-3p	2.43e-05	0.00023796	1.15066	-3.08291	-3.10814	-3.01235	-3.03369	-3.07446	-3.09603	-3.22205	-3.13428	-3.27834	-3.32109	-3.32191	-3.27732	-3.28825	-3.31458	-3.28764	-3.28542
hsa-miR-3190-5p	2.43e-05	0.00023796	1.15066	-3.08291	-3.10814	-3.01235	-3.03369	-3.07446	-3.09603	-3.22205	-3.13428	-3.27834	-3.32109	-3.32191	-3.27732	-3.28825	-3.31458	-3.28764	-3.28542
hsa-miR-3191-3p	2.43e-05	0.00023796	1.15066	-3.08291	-3.10814	-3.01235	-3.03369	-3.07446	-3.09603	-3.22205	-3.13428	-3.27834	-3.32109	-3.32191	-3.27732	-3.28825	-3.31458	-3.28764	-3.28542
hsa-miR-3191-5p	2.43e-05	0.00023796	1.15066	-3.08291	-3.10814	-3.01235	-3.03369	-3.07446	-3.09603	-3.22205	-3.13428	-3.27834	-3.32109	-3.32191	-3.27732	-3.28825	-3.31458	-3.28764	-3.28542
hsa-miR-3192	2.43e-05	0.00023796	1.15066	-3.08291	-3.10814	-3.01235	-3.03369	-3.07446	-3.09603	-3.22205	-3.13428	-3.27834	-3.32109	-3.32191	-3.27732	-3.28825	-3.31458	-3.28764	-3.28542
hsa-miR-3193	2.43e-05	0.00023796	1.15066	-3.08291	-3.10814	-3.01235	-3.03369	-3.07446	-3.09603	-3.22205	-3.13428	-3.27834	-3.32109	-3.32191	-3.27732	-3.28825	-3.31458	-3.28764	-3.28542
hsa-miR-3194-3p	2.43e-05	0.00023796	1.15066	-3.08291	-3.10814	-3.01235	-3.03369	-3.07446	-3.09603	-3.22205	-3.13428	-3.27834	-3.32109	-3.32191	-3.27732	-3.28825	-3.31458	-3.28764	-3.28542
hsa-miR-3194-5p	0.100004	0.0816538	0.514888	-3.08291	-3.10814	-3.01235	-3.03369	-3.07446	-3.09603	-3.22205	-3.13428	-3.27834	-3.32109	-3.32191	-3.27732	-1.89603	-1.90297	-1.68526	-0.820963
hsa-miR-3195	0.104707	0.103614	0.896317	2.70544	-3.10814	-3.01235	-3.03369	-3.07446	-3.09603	1.1931	1.32389	-0.70035	-0.183868	-0.78939	0.442089	1.69706	1.62399	0.613855	0.999929
hsa-miR-3196	0.00971441	0.0108634	0.415673	-3.08291	-3.10814	-3.01235	-3.03369	-3.07446	-3.09603	1.28188	-3.13428	-0.510604	-0.801346	-0.611199	-3.27732	0.554514	0.333962	0.665169	0.582132
hsa-miR-3197	2.43e-05	0.00023796	1.15066	-3.08291	-3.10814	-3.01235	-3.03369	-3.07446	-3.09603	-3.22205	-3.13428	-3.27834	-3.32109	-3.32191	-3.27732	-3.28825	-3.31458	-3.28764	-3.28542
hsa-miR-3198	2.43e-05	0.00023796	1.15066	-3.08291	-3.10814	-3.01235	-3.03369	-3.07446	-3.09603	-3.22205	-3.13428	-3.27834	-3.32109	-3.32191	-3.27732	-3.28825	-3.31458	-3.28764	-3.28542
hsa-miR-3199	2.43e-05	0.00023796	1.15066	-3.08291	-3.10814	-3.01235	-3.03369	-3.07446	-3.09603	-3.22205	-3.13428	-3.27834	-3.32109	-3.32191	-3.27732	-3.28825	-3.31458	-3.28764	-3.28542
hsa-miR-32-3p	0.77239	1	0.775691	-3.08291	-3.10814	-3.01235	-3.03369	-3.07446	-3.09603	-3.22205	-3.13428	-3.27834	-3.32109	-3.32191	-3.27732	-3.28825	-1.01727	-3.28764	-3.28542
hsa-miR-32-5p	2.43e-05	0.00023796	1.15066	-3.08291	-3.10814	-3.01235	-3.03369	-3.07446	-3.09603	-3.22205	-3.13428	-3.27834	-3.32109	-3.32191	-3.27732	-3.28825	-3.31458	-3.28764	-3.28542
hsa-miR-3200-3p	2.43e-05	0.00023796	1.15066	-3.08291	-3.10814	-3.01235	-3.03369	-3.07446	-3.09603	-3.22205	-3.13428	-3.27834	-3.32109	-3.32191	-3.27732	-3.28825	-3.31458	-3.28764	-3.28542
hsa-miR-3200-5p	2.43e-05	0.00023796	1.15066	-3.08291	-3.10814	-3.01235	-3.03369	-3.07446	-3.09603	-3.22205	-3.13428	-3.27834	-3.32109	-3.32191	-3.27732	-3.28825	-3.31458	-3.28764	-3.28542
hsa-miR-3201	2.43e-05	0.00023796	1.15066	-3.08291	-3.10814	-3.01235	-3.03369	-3.07446	-3.09603	-3.22205	-3.13428	-3.27834	-3.32109	-3.32191	-3.27732	-3.28825	-3.31458	-3.28764	-3.28542
hsa-miR-3202	0.988439	1	0.913223	-3.08291	-3.10814	-3.01235	-3.03369	-3.07446	-3.09603	-3.22205	-3.13428	-3.27834	-3.32109	-3.32191	-3.27732	-3.28825	-1.67955	-3.28764	-3.28542
hsa-miR-320a	0.0224481	0.00740819	0.234547	-3.08291	-3.10814	-3.01235	-3.03369	-3.07446	-3.09603	-3.22205	-3.13428	-3.27834	-2.52487	-2.54577	-3.27732	0.110216	-0.820963	-0.0552746	-0.260423
hsa-miR-320b	0.261561	0.267078	0.682086	-3.08291	-3.10814	-3.01235	-3.03369	-3.07446	-3.09603	-3.22205	-3.13428	-3.27834	-2.61789	-2.88222	-3.27732	-3.28825	-2.41445	-1.07057	-3.28542
hsa-miR-320c	0.0147664	0.0218068	0.22053	-3.08291	-3.10814	-3.01235	-3.03369	-3.07446	-3.09603	-0.183868	-3.13428	-3.27834	-0.611199	-0.820963	-3.27732	0.53678	1.05464	0.217976	0.709997
hsa-miR-320d	0.557224	0.560458	0.916948	-3.08291	-3.10814	-3.01235	-3.03369	-3.07446	-3.09603	-3.22205	-3.13428	-3.27834	-2.54577	-2.61653	-3.27732	-3.28825	-2.52487	-3.28764	-3.28542
hsa-miR-320e	0.769146	0.753922	0.95416	-3.08291	-3.10814	-3.01235	-3.03369	-3.07446	-3.09603	-3.22205	-3.13428	-3.27834	-2.59933	-2.90181	-3.27732	-3.28825	-2.5614	-3.28764	-3.28542
hsa-miR-323a-3p	2.43e-05	0.00023796	1.15066	-3.08291	-3.10814	-3.01235	-3.03369	-3.07446	-3.09603	-3.22205	-3.13428	-3.27834	-3.32109	-3.32191	-3.27732	-3.28825	-3.31458	-3.28764	-3.28542
hsa-miR-323a-5p	2.43e-05	0.00023796	1.15066	-3.08291	-3.10814	-3.01235	-3.03369	-3.07446	-3.09603	-3.22205	-3.13428	-3.27834	-3.32109	-3.32191	-3.27732	-3.28825	-3.31458	-3.28764	-3.28542
hsa-miR-323b-3p	2.43e-05	0.00023796	1.15066	-3.08291	-3.10814	-3.01235	-3.03369	-3.07446	-3.09603	-3.22205	-3.13428	-3.27834	-3.32109	-3.32191	-3.27732	-3.28825	-3.31458	-3.28764	-3.28542
hsa-miR-323b-5p	2.43e-05	0.00023796	1.15066	-3.08291	-3.10814	-3.01235	-3.03369	-3.07446	-3.09603	-3.22205	-3.13428	-3.27834	-3.32109	-3.32191	-3.27732	-3.28825	-3.31458	-3.28764	-3.28542
hsa-miR-324-3p	0.701109	0.750907	1.01025	-3.08291	-3.10814	-3.01235	-3.03369	-3.07446	-3.09603	-3.22205	-3.13428	-3.27834	-2.49808	-2.8762	-3.27732	-3.28825	-3.31458	-3.28764	-3.28542
hsa-miR-324-5p	2.43e-05	0.00023796	1.15066	-3.08291	-3.10814	-3.01235	-3.03369	-3.07446	-3.09603	-3.22205	-3.13428	-3.27834	-3.32109	-3.32191	-3.27732	-3.28825	-3.31458	-3.28764	-3.28542
hsa-miR-325	2.43e-05	0.00023796	1.15066	-3.08291	-3.10814	-3.01235	-3.03369	-3.07446	-3.09603	-3.22205	-3.13428	-3.27834	-3.32109	-3.32191	-3.27732	-3.28825	-3.31458	-3.28764	-3.28542
hsa-miR-326	2.43e-05	0.00023796	1.15066	-3.08291	-3.10814	-3.01235	-3.03369	-3.07446	-3.09603	-3.22205	-3.13428	-3.27834	-3.32109	-3.32191	-3.27732	-3.28825	-3.31458	-3.28764	-3.28542
hsa-miR-328	2.43e-05	0.00023796	1.15066	-3.08291	-3.10814	-3.01235	-3.03369	-3.07446	-3.09603	-3.22205	-3.13428	-3.27834	-3.32109	-3.32191	-3.27732	-3.28825	-3.31458	-3.28764	-3.28542
hsa-miR-329	2.43e-05	0.00023796	1.15066	-3.08291	-3.10814	-3.01235	-3.03369	-3.07446	-3.09603	-3.22205	-3.13428	-3.27834	-3.32109	-3.32191	-3.27732	-3.28825	-3.31458	-3.28764	-3.28542
hsa-miR-330-3p	2.43e-05	0.00023796	1.15066	-3.08291	-3.10814	-3.01235	-3.03369	-3.07446	-3.09603	-3.22205	-3.13428	-3.27834	-3.32109	-3.32191	-3.27732	-3.28825	-3.31458	-3.28764	-3.28542
hsa-miR-330-5p	2.43e-05	0.00023796	1.15066	-3.08291	-3.10814	-3.01235	-3.03369	-3.07446	-3.09603	-3.22205	-3.13428	-3.27834	-3.32109	-3.32191	-3.27732	-3.28825	-3.31458	-3.28764	-3.28542
hsa-miR-331-3p	2.43e-05	0.00023796	1.15066	-3.08291	-3.10814	-3.01235	-3.03369	-3.07446	-3.09603	-3.22205	-3.13428	-3.27834	-3.32109	-3.32191	-3.27732	-3.28825	-3.31458	-3.28764	-3.28542
hsa-miR-331-5p	2.43e-05	0.00023796	1.15066	-3.08291	-3.10814	-3.01235	-3.03369	-3.07446	-3.09603	-3.22205	-3.13428	-3.27834	-3.32109	-3.32191	-3.27732	-3.28825	-3.31458	-3.28764	-3.28542
hsa-miR-335-3p	2.43e-05	0.00023796	1.15066	-3.08291	-3.10814	-3.01235	-3.03369	-3.07446	-3.09603	-3.22205	-3.13428	-3.27834	-3.32109	-3.32191	-3.27732	-3.28825	-3.31458	-3.28764	-3.28542
hsa-miR-335-5p	2.43e-05	0.00023796	1.15066	-3.08291	-3.10814	-3.01235	-3.03369	-3.07446	-3.09603	-3.22205	-3.13428	-3.27834	-3.32109	-3.32191	-3.27732	-3.28825	-3.31458	-3.28764	-3.28542
hsa-miR-337-3p	2.43e-05	0.00023796	1.15066	-3.08291	-3.10814	-3.01235	-3.03369	-3.07446	-3.09603	-3.22205	-3.13428	-3.27834	-3.32109	-3.32191	-3.27732	-3.28825	-3.31458	-3.28764	-3.28542
hsa-miR-337-5p	2.43e-05	0.00023796	1.15066	-3.08291	-3.10814	-3.01235	-3.03369	-3.07446	-3.09603	-3.22205	-3.13428	-3.27834	-3.32109	-3.32191	-3.27732	-3.28825	-3.31458	-3.28764	-3.28542
hsa-miR-338-3p	0.152011	0.151692	0.467713	-3.08291	-3.10814	-3.01235	-3.03369	-3.07446	-3.09603	-3.22205	-3.13428	-0.760021	-2.50534	-2.52487	-0.611199	-3.28825	-3.31458	-3.28764	-3.28542
hsa-miR-338-5p	2.43e-05	0.00023796	1.15066	-3.08291	-3.10814	-3.01235	-3.03369	-3.07446	-3.09603	-3.22205	-3.13428	-3.27834	-3.32109	-3.32191	-3.27732	-3.28825	-3.31458	-3.28764	-3.28542
hsa-miR-339-3p	2.43e-05	0.00023796	1.15066	-3.08291	-3.10814	-3.01235	-3.03369	-3.07446	-3.09603	-3.22205	-3.13428	-3.27834	-3.32109	-3.32191	-3.27732	-3.28825	-3.31458	-3.28764	-3.28542
hsa-miR-339-5p	2.43e-05	0.00023796	1.15066	-3.08291	-3.10814	-3.01235	-3.03369	-3.07446	-3.09603	-3.22205	-3.13428	-3.27834	-3.32109	-3.32191	-3.27732	-3.28825	-3.31458	-3.28764	-3.28542
hsa-miR-33a-3p	2.43e-05	0.00023796	1.15066	-3.08291	-3.10814	-3.01235	-3.03369	-3.07446	-3.09603	-3.22205	-3.13428	-3.27834	-3.32109	-3.32191	-3.27732	-3.28825	-3.31458	-3.28764	-3.28542
hsa-miR-33a-5p	2.43e-05	0.00023796	1.15066	-3.08291	-3.10814	-3.01235	-3.03369	-3.07446	-3.09603	-3.22205	-3.13428	-3.27834	-3.32109	-3.32191	-3.27732	-3.28825	-3.31458	-3.28764	-3.28542
hsa-miR-33b-3p	2.43e-05	0.00023796	1.15066	-3.08291	-3.10814	-3.01235	-3.03369	-3.07446	-3.09603	-3.22205	-3.13428	-3.27834	-3.32109	-3.32191	-3.27732	-3.28825	-3.31458	-3.28764	-3.28542
hsa-miR-33b-5p	2.43e-05	0.00023796	1.15066	-3.08291	-3.10814	-3.01235	-3.03369	-3.07446	-3.09603	-3.22205	-3.13428	-3.27834	-3.32109	-3.32191	-3.27732	-3.28825	-3.31458	-3.28764	-3.28542
hsa-miR-340-3p	2.43e-05	0.00023796	1.15066	-3.08291	-3.10814	-3.01235	-3.03369	-3.07446	-3.09603	-3.22205	-3.13428	-3.27834	-3.32109	-3.32191	-3.27732	-3.28825	-3.31458	-3.28764	-3.28542
hsa-miR-340-5p	2.43e-05	0.00023796	1.15066	-3.08291	-3.10814	-3.01235	-3.03369	-3.07446	-3.09603	-3.22205	-3.13428	-3.27834	-3.32109	-3.32191	-3.27732	-3.28825	-3.31458	-3.28764	-3.28542
hsa-miR-342-3p	0.609192	0.667041	1.0206	-3.08291	-3.10814	-3.01235	-3.03369	-3.07446	-3.09603	-3.22205	-3.13428	-3.27834	-2.55639	-2.90175	-3.27732	-3.28825	-3.31458	-3.28764	-3.28542
hsa-miR-342-5p	2.43e-05	0.00023796	1.15066	-3.08291	-3.10814	-3.01235	-3.03369	-3.07446	-3.09603	-3.22205	-3.13428	-3.27834	-3.32109	-3.32191	-3.27732	-3.28825	-3.31458	-3.28764	-3.28542
hsa-miR-345-3p	0.0238502	0.018174	0.344231	-3.08291	-3.10814	-3.01235	-3.03369	-3.07446	-3.09603	-3.22205	-3.13428	-3.27834	-2.86752	-2.45954	-3.27732	-0.739123	-0.78939	-1.10157	-0.855729
hsa-miR-345-5p	2.43e-05	0.00023796	1.15066	-3.08291	-3.10814	-3.01235	-3.03369	-3.07446	-3.09603	-3.22205	-3.13428	-3.27834	-3.32109	-3.32191	-3.27732	-3.28825	-3.31458	-3.28764	-3.28542
hsa-miR-346	2.43e-05	0.00023796	1.15066	-3.08291	-3.10814	-3.01235	-3.03369	-3.07446	-3.09603	-3.22205	-3.13428	-3.27834	-3.32109	-3.32191	-3.27732	-3.28825	-3.31458	-3.28764	-3.28542
hsa-miR-34a-3p	2.43e-05	0.00023796	1.15066	-3.08291	-3.10814	-3.01235	-3.03369	-3.07446	-3.09603	-3.22205	-3.13428	-3.27834	-3.32109	-3.32191	-3.27732	-3.28825	-3.31458	-3.28764	-3.28542
hsa-miR-34a-5p	0.245165	0.269232	0.595481	-3.08291	-3.10814	-3.01235	-3.03369	-3.07446	-3.09603	-3.22205	-3.13428	-0.859996	-2.38936	-1.64242	-3.27732	-3.28825	-3.31458	-3.28764	-3.28542
hsa-miR-34b-3p	2.43e-05	0.00023796	1.15066	-3.08291	-3.10814	-3.01235	-3.03369	-3.07446	-3.09603	-3.22205	-3.13428	-3.27834	-3.32109	-3.32191	-3.27732	-3.28825	-3.31458	-3.28764	-3.28542
hsa-miR-34b-5p	2.43e-05	0.00023796	1.15066	-3.08291	-3.10814	-3.01235	-3.03369	-3.07446	-3.09603	-3.22205	-3.13428	-3.27834	-3.32109	-3.32191	-3.27732	-3.28825	-3.31458	-3.28764	-3.28542
hsa-miR-34c-3p	2.43e-05	0.00023796	1.15066	-3.08291	-3.10814	-3.01235	-3.03369	-3.07446	-3.09603	-3.22205	-3.13428	-3.27834	-3.32109	-3.32191	-3.27732	-3.28825	-3.31458	-3.28764	-3.28542
hsa-miR-34c-5p	2.43e-05	0.00023796	1.15066	-3.08291	-3.10814	-3.01235	-3.03369	-3.07446	-3.09603	-3.22205	-3.13428	-3.27834	-3.32109	-3.32191	-3.27732	-3.28825	-3.31458	-3.28764	-3.28542
hsa-miR-3529-3p	2.43e-05	0.00023796	1.15066	-3.08291	-3.10814	-3.01235	-3.03369	-3.07446	-3.09603	-3.22205	-3.13428	-3.27834	-3.32109	-3.32191	-3.27732	-3.28825	-3.31458	-3.28764	-3.28542
hsa-miR-3529-5p	2.43e-05	0.00023796	1.15066	-3.08291	-3.10814	-3.01235	-3.03369	-3.07446	-3.09603	-3.22205	-3.13428	-3.27834	-3.32109	-3.32191	-3.27732	-3.28825	-3.31458	-3.28764	-3.28542
hsa-miR-3591-3p	2.43e-05	0.00023796	1.15066	-3.08291	-3.10814	-3.01235	-3.03369	-3.07446	-3.09603	-3.22205	-3.13428	-3.27834	-3.32109	-3.32191	-3.27732	-3.28825	-3.31458	-3.28764	-3.28542
hsa-miR-3591-5p	2.43e-05	0.00023796	1.15066	-3.08291	-3.10814	-3.01235	-3.03369	-3.07446	-3.09603	-3.22205	-3.13428	-3.27834	-3.32109	-3.32191	-3.27732	-3.28825	-3.31458	-3.28764	-3.28542
hsa-miR-3605-3p	2.43e-05	0.00023796	1.15066	-3.08291	-3.10814	-3.01235	-3.03369	-3.07446	-3.09603	-3.22205	-3.13428	-3.27834	-3.32109	-3.32191	-3.27732	-3.28825	-3.31458	-3.28764	-3.28542
hsa-miR-3605-5p	2.43e-05	0.00023796	1.15066	-3.08291	-3.10814	-3.01235	-3.03369	-3.07446	-3.09603	-3.22205	-3.13428	-3.27834	-3.32109	-3.32191	-3.27732	-3.28825	-3.31458	-3.28764	-3.28542
hsa-miR-3606-3p	2.43e-05	0.00023796	1.15066	-3.08291	-3.10814	-3.01235	-3.03369	-3.07446	-3.09603	-3.22205	-3.13428	-3.27834	-3.32109	-3.32191	-3.27732	-3.28825	-3.31458	-3.28764	-3.28542
hsa-miR-3606-5p	2.43e-05	0.00023796	1.15066	-3.08291	-3.10814	-3.01235	-3.03369	-3.07446	-3.09603	-3.22205	-3.13428	-3.27834	-3.32109	-3.32191	-3.27732	-3.28825	-3.31458	-3.28764	-3.28542
hsa-miR-3607-3p	2.43e-05	0.00023796	1.15066	-3.08291	-3.10814	-3.01235	-3.03369	-3.07446	-3.09603	-3.22205	-3.13428	-3.27834	-3.32109	-3.32191	-3.27732	-3.28825	-3.31458	-3.28764	-3.28542
hsa-miR-3607-5p	2.43e-05	0.00023796	1.15066	-3.08291	-3.10814	-3.01235	-3.03369	-3.07446	-3.09603	-3.22205	-3.13428	-3.27834	-3.32109	-3.32191	-3.27732	-3.28825	-3.31458	-3.28764	-3.28542
hsa-miR-3609	2.43e-05	0.00023796	1.15066	-3.08291	-3.10814	-3.01235	-3.03369	-3.07446	-3.09603	-3.22205	-3.13428	-3.27834	-3.32109	-3.32191	-3.27732	-3.28825	-3.31458	-3.28764	-3.28542
hsa-miR-361-3p	2.43e-05	0.00023796	1.15066	-3.08291	-3.10814	-3.01235	-3.03369	-3.07446	-3.09603	-3.22205	-3.13428	-3.27834	-3.32109	-3.32191	-3.27732	-3.28825	-3.31458	-3.28764	-3.28542
hsa-miR-361-5p	0.0243001	0.0199915	1.10363	-3.08291	-3.10814	-3.01235	-3.03369	-3.07446	-3.09603	-3.22205	-3.13428	-3.27834	-2.89161	-3.32191	-3.27732	-3.28825	-3.31458	-3.28764	-3.28542
hsa-miR-3610	0.53926	0.476917	0.818446	-3.08291	-3.10814	-3.01235	-3.03369	-3.07446	-3.09603	-3.22205	-3.13428	-3.27834	-3.32109	-3.32191	-3.27732	-1.91786	-1.89603	-3.28764	-3.28542
hsa-miR-3611	2.43e-05	0.00023796	1.15066	-3.08291	-3.10814	-3.01235	-3.03369	-3.07446	-3.09603	-3.22205	-3.13428	-3.27834	-3.32109	-3.32191	-3.27732	-3.28825	-3.31458	-3.28764	-3.28542
hsa-miR-3612	2.43e-05	0.00023796	1.15066	-3.08291	-3.10814	-3.01235	-3.03369	-3.07446	-3.09603	-3.22205	-3.13428	-3.27834	-3.32109	-3.32191	-3.27732	-3.28825	-3.31458	-3.28764	-3.28542
hsa-miR-3613-3p	2.43e-05	0.00023796	1.15066	-3.08291	-3.10814	-3.01235	-3.03369	-3.07446	-3.09603	-3.22205	-3.13428	-3.27834	-3.32109	-3.32191	-3.27732	-3.28825	-3.31458	-3.28764	-3.28542
hsa-miR-3613-5p	2.43e-05	0.00023796	1.15066	-3.08291	-3.10814	-3.01235	-3.03369	-3.07446	-3.09603	-3.22205	-3.13428	-3.27834	-3.32109	-3.32191	-3.27732	-3.28825	-3.31458	-3.28764	-3.28542
hsa-miR-3614-3p	2.43e-05	0.00023796	1.15066	-3.08291	-3.10814	-3.01235	-3.03369	-3.07446	-3.09603	-3.22205	-3.13428	-3.27834	-3.32109	-3.32191	-3.27732	-3.28825	-3.31458	-3.28764	-3.28542
hsa-miR-3614-5p	2.43e-05	0.00023796	1.15066	-3.08291	-3.10814	-3.01235	-3.03369	-3.07446	-3.09603	-3.22205	-3.13428	-3.27834	-3.32109	-3.32191	-3.27732	-3.28825	-3.31458	-3.28764	-3.28542
hsa-miR-3615	2.43e-05	0.00023796	1.15066	-3.08291	-3.10814	-3.01235	-3.03369	-3.07446	-3.09603	-3.22205	-3.13428	-3.27834	-3.32109	-3.32191	-3.27732	-3.28825	-3.31458	-3.28764	-3.28542
hsa-miR-3616-3p	2.43e-05	0.00023796	1.15066	-3.08291	-3.10814	-3.01235	-3.03369	-3.07446	-3.09603	-3.22205	-3.13428	-3.27834	-3.32109	-3.32191	-3.27732	-3.28825	-3.31458	-3.28764	-3.28542
hsa-miR-3616-5p	2.43e-05	0.00023796	1.15066	-3.08291	-3.10814	-3.01235	-3.03369	-3.07446	-3.09603	-3.22205	-3.13428	-3.27834	-3.32109	-3.32191	-3.27732	-3.28825	-3.31458	-3.28764	-3.28542
hsa-miR-3617-3p	2.43e-05	0.00023796	1.15066	-3.08291	-3.10814	-3.01235	-3.03369	-3.07446	-3.09603	-3.22205	-3.13428	-3.27834	-3.32109	-3.32191	-3.27732	-3.28825	-3.31458	-3.28764	-3.28542
hsa-miR-3617-5p	2.43e-05	0.00023796	1.15066	-3.08291	-3.10814	-3.01235	-3.03369	-3.07446	-3.09603	-3.22205	-3.13428	-3.27834	-3.32109	-3.32191	-3.27732	-3.28825	-3.31458	-3.28764	-3.28542
hsa-miR-3618	2.43e-05	0.00023796	1.15066	-3.08291	-3.10814	-3.01235	-3.03369	-3.07446	-3.09603	-3.22205	-3.13428	-3.27834	-3.32109	-3.32191	-3.27732	-3.28825	-3.31458	-3.28764	-3.28542
hsa-miR-3619-3p	2.43e-05	0.00023796	1.15066	-3.08291	-3.10814	-3.01235	-3.03369	-3.07446	-3.09603	-3.22205	-3.13428	-3.27834	-3.32109	-3.32191	-3.27732	-3.28825	-3.31458	-3.28764	-3.28542
hsa-miR-3619-5p	2.43e-05	0.00023796	1.15066	-3.08291	-3.10814	-3.01235	-3.03369	-3.07446	-3.09603	-3.22205	-3.13428	-3.27834	-3.32109	-3.32191	-3.27732	-3.28825	-3.31458	-3.28764	-3.28542
hsa-miR-362-3p	2.43e-05	0.00023796	1.15066	-3.08291	-3.10814	-3.01235	-3.03369	-3.07446	-3.09603	-3.22205	-3.13428	-3.27834	-3.32109	-3.32191	-3.27732	-3.28825	-3.31458	-3.28764	-3.28542
hsa-miR-362-5p	2.43e-05	0.00023796	1.15066	-3.08291	-3.10814	-3.01235	-3.03369	-3.07446	-3.09603	-3.22205	-3.13428	-3.27834	-3.32109	-3.32191	-3.27732	-3.28825	-3.31458	-3.28764	-3.28542
hsa-miR-3620-3p	2.43e-05	0.00023796	1.15066	-3.08291	-3.10814	-3.01235	-3.03369	-3.07446	-3.09603	-3.22205	-3.13428	-3.27834	-3.32109	-3.32191	-3.27732	-3.28825	-3.31458	-3.28764	-3.28542
hsa-miR-3620-5p	0.285906	0.330205	1.06148	-3.08291	-3.10814	-3.01235	-3.03369	-3.07446	-3.09603	-3.22205	-3.13428	-3.27834	-3.32109	-3.32191	-3.27732	-3.28825	-2.56566	-3.28764	-3.28542
hsa-miR-3621	2.43e-05	0.00023796	1.15066	-3.08291	-3.10814	-3.01235	-3.03369	-3.07446	-3.09603	-3.22205	-3.13428	-3.27834	-3.32109	-3.32191	-3.27732	-3.28825	-3.31458	-3.28764	-3.28542
hsa-miR-3622a-3p	2.43e-05	0.00023796	1.15066	-3.08291	-3.10814	-3.01235	-3.03369	-3.07446	-3.09603	-3.22205	-3.13428	-3.27834	-3.32109	-3.32191	-3.27732	-3.28825	-3.31458	-3.28764	-3.28542
hsa-miR-3622a-5p	2.43e-05	0.00023796	1.15066	-3.08291	-3.10814	-3.01235	-3.03369	-3.07446	-3.09603	-3.22205	-3.13428	-3.27834	-3.32109	-3.32191	-3.27732	-3.28825	-3.31458	-3.28764	-3.28542
hsa-miR-3622b-3p	2.43e-05	0.00023796	1.15066	-3.08291	-3.10814	-3.01235	-3.03369	-3.07446	-3.09603	-3.22205	-3.13428	-3.27834	-3.32109	-3.32191	-3.27732	-3.28825	-3.31458	-3.28764	-3.28542
hsa-miR-3622b-5p	2.43e-05	0.00023796	1.15066	-3.08291	-3.10814	-3.01235	-3.03369	-3.07446	-3.09603	-3.22205	-3.13428	-3.27834	-3.32109	-3.32191	-3.27732	-3.28825	-3.31458	-3.28764	-3.28542
hsa-miR-363-3p	2.43e-05	0.00023796	1.15066	-3.08291	-3.10814	-3.01235	-3.03369	-3.07446	-3.09603	-3.22205	-3.13428	-3.27834	-3.32109	-3.32191	-3.27732	-3.28825	-3.31458	-3.28764	-3.28542
hsa-miR-363-5p	2.43e-05	0.00023796	1.15066	-3.08291	-3.10814	-3.01235	-3.03369	-3.07446	-3.09603	-3.22205	-3.13428	-3.27834	-3.32109	-3.32191	-3.27732	-3.28825	-3.31458	-3.28764	-3.28542
hsa-miR-3646	2.43e-05	0.00023796	1.15066	-3.08291	-3.10814	-3.01235	-3.03369	-3.07446	-3.09603	-3.22205	-3.13428	-3.27834	-3.32109	-3.32191	-3.27732	-3.28825	-3.31458	-3.28764	-3.28542
hsa-miR-3648	0.0388065	0.0354465	0.207521	-3.08291	-3.10814	-3.01235	-3.03369	-3.07446	-3.09603	-3.22205	-3.13428	-3.27834	-2.53561	-3.32191	-3.27732	0.358231	-0.859996	-0.0860332	0.333962
hsa-miR-3649	2.43e-05	0.00023796	1.15066	-3.08291	-3.10814	-3.01235	-3.03369	-3.07446	-3.09603	-3.22205	-3.13428	-3.27834	-3.32109	-3.32191	-3.27732	-3.28825	-3.31458	-3.28764	-3.28542
hsa-miR-3650	2.43e-05	0.00023796	1.15066	-3.08291	-3.10814	-3.01235	-3.03369	-3.07446	-3.09603	-3.22205	-3.13428	-3.27834	-3.32109	-3.32191	-3.27732	-3.28825	-3.31458	-3.28764	-3.28542
hsa-miR-3651	2.43e-05	0.00023796	1.15066	-3.08291	-3.10814	-3.01235	-3.03369	-3.07446	-3.09603	-3.22205	-3.13428	-3.27834	-3.32109	-3.32191	-3.27732	-3.28825	-3.31458	-3.28764	-3.28542
hsa-miR-3652	0.366683	0.407063	0.782756	-3.08291	-3.10814	-3.01235	-3.03369	-3.07446	-3.09603	-3.22205	-3.13428	-3.27834	-2.55871	-1.5766	-3.27732	-3.28825	-2.48832	-3.28764	-3.28542
hsa-miR-3653	2.43e-05	0.00023796	1.15066	-3.08291	-3.10814	-3.01235	-3.03369	-3.07446	-3.09603	-3.22205	-3.13428	-3.27834	-3.32109	-3.32191	-3.27732	-3.28825	-3.31458	-3.28764	-3.28542
hsa-miR-3654	2.43e-05	0.00023796	1.15066	-3.08291	-3.10814	-3.01235	-3.03369	-3.07446	-3.09603	-3.22205	-3.13428	-3.27834	-3.32109	-3.32191	-3.27732	-3.28825	-3.31458	-3.28764	-3.28542
hsa-miR-3655	2.43e-05	0.00023796	1.15066	-3.08291	-3.10814	-3.01235	-3.03369	-3.07446	-3.09603	-3.22205	-3.13428	-3.27834	-3.32109	-3.32191	-3.27732	-3.28825	-3.31458	-3.28764	-3.28542
hsa-miR-3656	0.132788	0.0857573	1.34295	5.30778	-3.10814	-3.01235	-3.03369	-3.07446	3.87116	3.56217	4.16951	3.23318	2.54588	2.54588	2.94923	3.23318	3.30968	2.8269	2.94923
hsa-miR-3657	2.43e-05	0.00023796	1.15066	-3.08291	-3.10814	-3.01235	-3.03369	-3.07446	-3.09603	-3.22205	-3.13428	-3.27834	-3.32109	-3.32191	-3.27732	-3.28825	-3.31458	-3.28764	-3.28542
hsa-miR-3658	2.43e-05	0.00023796	1.15066	-3.08291	-3.10814	-3.01235	-3.03369	-3.07446	-3.09603	-3.22205	-3.13428	-3.27834	-3.32109	-3.32191	-3.27732	-3.28825	-3.31458	-3.28764	-3.28542
hsa-miR-3659	2.43e-05	0.00023796	1.15066	-3.08291	-3.10814	-3.01235	-3.03369	-3.07446	-3.09603	-3.22205	-3.13428	-3.27834	-3.32109	-3.32191	-3.27732	-3.28825	-3.31458	-3.28764	-3.28542
hsa-miR-365a-3p	0.151402	0.215578	0.314539	-3.08291	-3.10814	-3.01235	-3.03369	-3.07446	-3.09603	-3.22205	-3.13428	-3.27834	-0.70035	-1.05899	0.456188	-3.28825	-3.31458	-3.28764	-3.28542
hsa-miR-365a-5p	0.215448	0.356465	0.504605	-3.08291	-3.10814	-3.01235	-3.03369	-3.07446	-3.09603	-3.22205	-3.13428	-3.27834	-2.87708	-2.8401	-3.27732	-1.09095	-3.31458	-0.510604	-3.28542
hsa-miR-365b-5p	2.43e-05	0.00023796	1.15066	-3.08291	-3.10814	-3.01235	-3.03369	-3.07446	-3.09603	-3.22205	-3.13428	-3.27834	-3.32109	-3.32191	-3.27732	-3.28825	-3.31458	-3.28764	-3.28542
hsa-miR-3660	2.43e-05	0.00023796	1.15066	-3.08291	-3.10814	-3.01235	-3.03369	-3.07446	-3.09603	-3.22205	-3.13428	-3.27834	-3.32109	-3.32191	-3.27732	-3.28825	-3.31458	-3.28764	-3.28542
hsa-miR-3661	2.43e-05	0.00023796	1.15066	-3.08291	-3.10814	-3.01235	-3.03369	-3.07446	-3.09603	-3.22205	-3.13428	-3.27834	-3.32109	-3.32191	-3.27732	-3.28825	-3.31458	-3.28764	-3.28542
hsa-miR-3662	2.43e-05	0.00023796	1.15066	-3.08291	-3.10814	-3.01235	-3.03369	-3.07446	-3.09603	-3.22205	-3.13428	-3.27834	-3.32109	-3.32191	-3.27732	-3.28825	-3.31458	-3.28764	-3.28542
hsa-miR-3663-3p	0.0679312	0.08938	1.74846	-3.08291	-3.10814	-3.01235	-3.03369	-3.07446	-3.09603	3.87116	-3.13428	-3.27834	-0.675948	0.110216	0.419577	0.25626	0.0300821	0.402063	1.11159
hsa-miR-3663-5p	2.43e-05	0.00023796	1.15066	-3.08291	-3.10814	-3.01235	-3.03369	-3.07446	-3.09603	-3.22205	-3.13428	-3.27834	-3.32109	-3.32191	-3.27732	-3.28825	-3.31458	-3.28764	-3.28542
hsa-miR-3664-3p	2.43e-05	0.00023796	1.15066	-3.08291	-3.10814	-3.01235	-3.03369	-3.07446	-3.09603	-3.22205	-3.13428	-3.27834	-3.32109	-3.32191	-3.27732	-3.28825	-3.31458	-3.28764	-3.28542
hsa-miR-3664-5p	2.43e-05	0.00023796	1.15066	-3.08291	-3.10814	-3.01235	-3.03369	-3.07446	-3.09603	-3.22205	-3.13428	-3.27834	-3.32109	-3.32191	-3.27732	-3.28825	-3.31458	-3.28764	-3.28542
hsa-miR-3665	0.0267057	0.0278358	0.63182	-3.08291	-3.10814	-3.01235	-3.03369	-3.07446	4.2657	3.41867	4.2657	3.60188	2.8269	2.14251	3.02036	2.86355	3.50579	3.50579	4.0874
hsa-miR-3666	2.43e-05	0.00023796	1.15066	-3.08291	-3.10814	-3.01235	-3.03369	-3.07446	-3.09603	-3.22205	-3.13428	-3.27834	-3.32109	-3.32191	-3.27732	-3.28825	-3.31458	-3.28764	-3.28542
hsa-miR-3667-3p	2.43e-05	0.00023796	1.15066	-3.08291	-3.10814	-3.01235	-3.03369	-3.07446	-3.09603	-3.22205	-3.13428	-3.27834	-3.32109	-3.32191	-3.27732	-3.28825	-3.31458	-3.28764	-3.28542
hsa-miR-3667-5p	0.468233	0.475661	0.759663	-3.08291	-3.10814	-3.01235	-3.03369	-3.07446	-3.09603	-3.22205	-3.13428	-3.27834	-3.32109	-3.32191	-3.27732	-1.68526	-1.68526	-3.28764	-3.28542
hsa-miR-3668	2.43e-05	0.00023796	1.15066	-3.08291	-3.10814	-3.01235	-3.03369	-3.07446	-3.09603	-3.22205	-3.13428	-3.27834	-3.32109	-3.32191	-3.27732	-3.28825	-3.31458	-3.28764	-3.28542
hsa-miR-3669	2.43e-05	0.00023796	1.15066	-3.08291	-3.10814	-3.01235	-3.03369	-3.07446	-3.09603	-3.22205	-3.13428	-3.27834	-3.32109	-3.32191	-3.27732	-3.28825	-3.31458	-3.28764	-3.28542
hsa-miR-367-3p	2.43e-05	0.00023796	1.15066	-3.08291	-3.10814	-3.01235	-3.03369	-3.07446	-3.09603	-3.22205	-3.13428	-3.27834	-3.32109	-3.32191	-3.27732	-3.28825	-3.31458	-3.28764	-3.28542
hsa-miR-367-5p	2.43e-05	0.00023796	1.15066	-3.08291	-3.10814	-3.01235	-3.03369	-3.07446	-3.09603	-3.22205	-3.13428	-3.27834	-3.32109	-3.32191	-3.27732	-3.28825	-3.31458	-3.28764	-3.28542
hsa-miR-3670	2.43e-05	0.00023796	1.15066	-3.08291	-3.10814	-3.01235	-3.03369	-3.07446	-3.09603	-3.22205	-3.13428	-3.27834	-3.32109	-3.32191	-3.27732	-3.28825	-3.31458	-3.28764	-3.28542
hsa-miR-3671	2.43e-05	0.00023796	1.15066	-3.08291	-3.10814	-3.01235	-3.03369	-3.07446	-3.09603	-3.22205	-3.13428	-3.27834	-3.32109	-3.32191	-3.27732	-3.28825	-3.31458	-3.28764	-3.28542
hsa-miR-3672	2.43e-05	0.00023796	1.15066	-3.08291	-3.10814	-3.01235	-3.03369	-3.07446	-3.09603	-3.22205	-3.13428	-3.27834	-3.32109	-3.32191	-3.27732	-3.28825	-3.31458	-3.28764	-3.28542
hsa-miR-3673	2.43e-05	0.00023796	1.15066	-3.08291	-3.10814	-3.01235	-3.03369	-3.07446	-3.09603	-3.22205	-3.13428	-3.27834	-3.32109	-3.32191	-3.27732	-3.28825	-3.31458	-3.28764	-3.28542
hsa-miR-3674	2.43e-05	0.00023796	1.15066	-3.08291	-3.10814	-3.01235	-3.03369	-3.07446	-3.09603	-3.22205	-3.13428	-3.27834	-3.32109	-3.32191	-3.27732	-3.28825	-3.31458	-3.28764	-3.28542
hsa-miR-3675-3p	2.43e-05	0.00023796	1.15066	-3.08291	-3.10814	-3.01235	-3.03369	-3.07446	-3.09603	-3.22205	-3.13428	-3.27834	-3.32109	-3.32191	-3.27732	-3.28825	-3.31458	-3.28764	-3.28542
hsa-miR-3675-5p	2.43e-05	0.00023796	1.15066	-3.08291	-3.10814	-3.01235	-3.03369	-3.07446	-3.09603	-3.22205	-3.13428	-3.27834	-3.32109	-3.32191	-3.27732	-3.28825	-3.31458	-3.28764	-3.28542
hsa-miR-3676-3p	0.0299619	0.00023796	76.0355	2.70544	2.56957	4.98395	4.11598	-3.07446	-3.09603	-3.22205	-3.13428	-3.27834	-3.32109	-3.32191	-3.27732	-3.28825	-3.31458	-3.28764	-3.28542
hsa-miR-3676-5p	0.000170678	0.00158461	0.18666	-3.08291	-3.10814	-3.01235	-3.03369	-3.07446	-3.09603	1.08346	-3.13428	1.76003	1.0139	0.999929	1.22605	1.0139	0.512673	0.631801	0.0787163
hsa-miR-3677-3p	2.43e-05	0.00023796	1.15066	-3.08291	-3.10814	-3.01235	-3.03369	-3.07446	-3.09603	-3.22205	-3.13428	-3.27834	-3.32109	-3.32191	-3.27732	-3.28825	-3.31458	-3.28764	-3.28542
hsa-miR-3677-5p	2.43e-05	0.00023796	1.15066	-3.08291	-3.10814	-3.01235	-3.03369	-3.07446	-3.09603	-3.22205	-3.13428	-3.27834	-3.32109	-3.32191	-3.27732	-3.28825	-3.31458	-3.28764	-3.28542
hsa-miR-3678-3p	2.43e-05	0.00023796	1.15066	-3.08291	-3.10814	-3.01235	-3.03369	-3.07446	-3.09603	-3.22205	-3.13428	-3.27834	-3.32109	-3.32191	-3.27732	-3.28825	-3.31458	-3.28764	-3.28542
hsa-miR-3678-5p	2.43e-05	0.00023796	1.15066	-3.08291	-3.10814	-3.01235	-3.03369	-3.07446	-3.09603	-3.22205	-3.13428	-3.27834	-3.32109	-3.32191	-3.27732	-3.28825	-3.31458	-3.28764	-3.28542
hsa-miR-3679-3p	2.43e-05	0.00023796	1.15066	-3.08291	-3.10814	-3.01235	-3.03369	-3.07446	-3.09603	-3.22205	-3.13428	-3.27834	-3.32109	-3.32191	-3.27732	-3.28825	-3.31458	-3.28764	-3.28542
hsa-miR-3679-5p	9.82e-05	0.000948463	0.176538	-3.08291	-3.10814	-3.01235	-3.03369	-3.07446	-3.09603	0.747469	-3.13428	-0.771228	0.373177	1.1931	-0.231738	0.690492	1.68692	1.08346	1.16172
hsa-miR-3680-3p	2.43e-05	0.00023796	1.15066	-3.08291	-3.10814	-3.01235	-3.03369	-3.07446	-3.09603	-3.22205	-3.13428	-3.27834	-3.32109	-3.32191	-3.27732	-3.28825	-3.31458	-3.28764	-3.28542
hsa-miR-3680-5p	2.43e-05	0.00023796	1.15066	-3.08291	-3.10814	-3.01235	-3.03369	-3.07446	-3.09603	-3.22205	-3.13428	-3.27834	-3.32109	-3.32191	-3.27732	-3.28825	-3.31458	-3.28764	-3.28542
hsa-miR-3681-3p	2.43e-05	0.00023796	1.15066	-3.08291	-3.10814	-3.01235	-3.03369	-3.07446	-3.09603	-3.22205	-3.13428	-3.27834	-3.32109	-3.32191	-3.27732	-3.28825	-3.31458	-3.28764	-3.28542
hsa-miR-3681-5p	2.43e-05	0.00023796	1.15066	-3.08291	-3.10814	-3.01235	-3.03369	-3.07446	-3.09603	-3.22205	-3.13428	-3.27834	-3.32109	-3.32191	-3.27732	-3.28825	-3.31458	-3.28764	-3.28542
hsa-miR-3682-3p	2.43e-05	0.00023796	1.15066	-3.08291	-3.10814	-3.01235	-3.03369	-3.07446	-3.09603	-3.22205	-3.13428	-3.27834	-3.32109	-3.32191	-3.27732	-3.28825	-3.31458	-3.28764	-3.28542
hsa-miR-3682-5p	2.43e-05	0.00023796	1.15066	-3.08291	-3.10814	-3.01235	-3.03369	-3.07446	-3.09603	-3.22205	-3.13428	-3.27834	-3.32109	-3.32191	-3.27732	-3.28825	-3.31458	-3.28764	-3.28542
hsa-miR-3683	2.43e-05	0.00023796	1.15066	-3.08291	-3.10814	-3.01235	-3.03369	-3.07446	-3.09603	-3.22205	-3.13428	-3.27834	-3.32109	-3.32191	-3.27732	-3.28825	-3.31458	-3.28764	-3.28542
hsa-miR-3684	2.43e-05	0.00023796	1.15066	-3.08291	-3.10814	-3.01235	-3.03369	-3.07446	-3.09603	-3.22205	-3.13428	-3.27834	-3.32109	-3.32191	-3.27732	-3.28825	-3.31458	-3.28764	-3.28542
hsa-miR-3685	2.43e-05	0.00023796	1.15066	-3.08291	-3.10814	-3.01235	-3.03369	-3.07446	-3.09603	-3.22205	-3.13428	-3.27834	-3.32109	-3.32191	-3.27732	-3.28825	-3.31458	-3.28764	-3.28542
hsa-miR-3686	2.43e-05	0.00023796	1.15066	-3.08291	-3.10814	-3.01235	-3.03369	-3.07446	-3.09603	-3.22205	-3.13428	-3.27834	-3.32109	-3.32191	-3.27732	-3.28825	-3.31458	-3.28764	-3.28542
hsa-miR-3687	2.43e-05	0.00023796	1.15066	-3.08291	-3.10814	-3.01235	-3.03369	-3.07446	-3.09603	-3.22205	-3.13428	-3.27834	-3.32109	-3.32191	-3.27732	-3.28825	-3.31458	-3.28764	-3.28542
hsa-miR-3688-3p	2.43e-05	0.00023796	1.15066	-3.08291	-3.10814	-3.01235	-3.03369	-3.07446	-3.09603	-3.22205	-3.13428	-3.27834	-3.32109	-3.32191	-3.27732	-3.28825	-3.31458	-3.28764	-3.28542
hsa-miR-3688-5p	2.43e-05	0.00023796	1.15066	-3.08291	-3.10814	-3.01235	-3.03369	-3.07446	-3.09603	-3.22205	-3.13428	-3.27834	-3.32109	-3.32191	-3.27732	-3.28825	-3.31458	-3.28764	-3.28542
hsa-miR-3689a-3p	2.43e-05	0.00023796	1.15066	-3.08291	-3.10814	-3.01235	-3.03369	-3.07446	-3.09603	-3.22205	-3.13428	-3.27834	-3.32109	-3.32191	-3.27732	-3.28825	-3.31458	-3.28764	-3.28542
hsa-miR-3689a-5p	2.43e-05	0.00023796	1.15066	-3.08291	-3.10814	-3.01235	-3.03369	-3.07446	-3.09603	-3.22205	-3.13428	-3.27834	-3.32109	-3.32191	-3.27732	-3.28825	-3.31458	-3.28764	-3.28542
hsa-miR-3689b-3p	2.43e-05	0.00023796	1.15066	-3.08291	-3.10814	-3.01235	-3.03369	-3.07446	-3.09603	-3.22205	-3.13428	-3.27834	-3.32109	-3.32191	-3.27732	-3.28825	-3.31458	-3.28764	-3.28542
hsa-miR-3689d	2.43e-05	0.00023796	1.15066	-3.08291	-3.10814	-3.01235	-3.03369	-3.07446	-3.09603	-3.22205	-3.13428	-3.27834	-3.32109	-3.32191	-3.27732	-3.28825	-3.31458	-3.28764	-3.28542
hsa-miR-3689f	2.43e-05	0.00023796	1.15066	-3.08291	-3.10814	-3.01235	-3.03369	-3.07446	-3.09603	-3.22205	-3.13428	-3.27834	-3.32109	-3.32191	-3.27732	-3.28825	-3.31458	-3.28764	-3.28542
hsa-miR-369-3p	2.43e-05	0.00023796	1.15066	-3.08291	-3.10814	-3.01235	-3.03369	-3.07446	-3.09603	-3.22205	-3.13428	-3.27834	-3.32109	-3.32191	-3.27732	-3.28825	-3.31458	-3.28764	-3.28542
hsa-miR-369-5p	2.43e-05	0.00023796	1.15066	-3.08291	-3.10814	-3.01235	-3.03369	-3.07446	-3.09603	-3.22205	-3.13428	-3.27834	-3.32109	-3.32191	-3.27732	-3.28825	-3.31458	-3.28764	-3.28542
hsa-miR-3690	2.43e-05	0.00023796	1.15066	-3.08291	-3.10814	-3.01235	-3.03369	-3.07446	-3.09603	-3.22205	-3.13428	-3.27834	-3.32109	-3.32191	-3.27732	-3.28825	-3.31458	-3.28764	-3.28542
hsa-miR-3691-3p	2.43e-05	0.00023796	1.15066	-3.08291	-3.10814	-3.01235	-3.03369	-3.07446	-3.09603	-3.22205	-3.13428	-3.27834	-3.32109	-3.32191	-3.27732	-3.28825	-3.31458	-3.28764	-3.28542
hsa-miR-3691-5p	2.43e-05	0.00023796	1.15066	-3.08291	-3.10814	-3.01235	-3.03369	-3.07446	-3.09603	-3.22205	-3.13428	-3.27834	-3.32109	-3.32191	-3.27732	-3.28825	-3.31458	-3.28764	-3.28542
hsa-miR-3692-3p	2.43e-05	0.00023796	1.15066	-3.08291	-3.10814	-3.01235	-3.03369	-3.07446	-3.09603	-3.22205	-3.13428	-3.27834	-3.32109	-3.32191	-3.27732	-3.28825	-3.31458	-3.28764	-3.28542
hsa-miR-3692-5p	2.43e-05	0.00023796	1.15066	-3.08291	-3.10814	-3.01235	-3.03369	-3.07446	-3.09603	-3.22205	-3.13428	-3.27834	-3.32109	-3.32191	-3.27732	-3.28825	-3.31458	-3.28764	-3.28542
hsa-miR-370	2.43e-05	0.00023796	1.15066	-3.08291	-3.10814	-3.01235	-3.03369	-3.07446	-3.09603	-3.22205	-3.13428	-3.27834	-3.32109	-3.32191	-3.27732	-3.28825	-3.31458	-3.28764	-3.28542
hsa-miR-3713	2.43e-05	0.00023796	1.15066	-3.08291	-3.10814	-3.01235	-3.03369	-3.07446	-3.09603	-3.22205	-3.13428	-3.27834	-3.32109	-3.32191	-3.27732	-3.28825	-3.31458	-3.28764	-3.28542
hsa-miR-3714	2.43e-05	0.00023796	1.15066	-3.08291	-3.10814	-3.01235	-3.03369	-3.07446	-3.09603	-3.22205	-3.13428	-3.27834	-3.32109	-3.32191	-3.27732	-3.28825	-3.31458	-3.28764	-3.28542
hsa-miR-371a-3p	2.43e-05	0.00023796	1.15066	-3.08291	-3.10814	-3.01235	-3.03369	-3.07446	-3.09603	-3.22205	-3.13428	-3.27834	-3.32109	-3.32191	-3.27732	-3.28825	-3.31458	-3.28764	-3.28542
hsa-miR-371a-5p	0.00900463	0.00740819	0.118321	-3.08291	-3.10814	-3.01235	-3.03369	-3.07446	-3.09603	-3.22205	-3.13428	-3.27834	-2.14875	0.289442	-3.27732	0.184418	-0.0168114	1.0139	1.08346
hsa-miR-371b-3p	2.43e-05	0.00023796	1.15066	-3.08291	-3.10814	-3.01235	-3.03369	-3.07446	-3.09603	-3.22205	-3.13428	-3.27834	-3.32109	-3.32191	-3.27732	-3.28825	-3.31458	-3.28764	-3.28542
hsa-miR-371b-5p	0.00381497	0.00526049	0.225391	-3.08291	-3.10814	-3.01235	-3.03369	-3.07446	-3.09603	0.289442	1.68692	3.50579	0.25626	-0.536773	0.333962	-0.0352333	2.11132	0.554514	0.690492
hsa-miR-372	2.43e-05	0.00023796	1.15066	-3.08291	-3.10814	-3.01235	-3.03369	-3.07446	-3.09603	-3.22205	-3.13428	-3.27834	-3.32109	-3.32191	-3.27732	-3.28825	-3.31458	-3.28764	-3.28542
hsa-miR-373-3p	2.43e-05	0.00023796	1.15066	-3.08291	-3.10814	-3.01235	-3.03369	-3.07446	-3.09603	-3.22205	-3.13428	-3.27834	-3.32109	-3.32191	-3.27732	-3.28825	-3.31458	-3.28764	-3.28542
hsa-miR-373-5p	2.43e-05	0.00023796	1.15066	-3.08291	-3.10814	-3.01235	-3.03369	-3.07446	-3.09603	-3.22205	-3.13428	-3.27834	-3.32109	-3.32191	-3.27732	-3.28825	-3.31458	-3.28764	-3.28542
hsa-miR-374a-3p	2.43e-05	0.00023796	1.15066	-3.08291	-3.10814	-3.01235	-3.03369	-3.07446	-3.09603	-3.22205	-3.13428	-3.27834	-3.32109	-3.32191	-3.27732	-3.28825	-3.31458	-3.28764	-3.28542
hsa-miR-374a-5p	2.43e-05	0.00023796	1.15066	-3.08291	-3.10814	-3.01235	-3.03369	-3.07446	-3.09603	-3.22205	-3.13428	-3.27834	-3.32109	-3.32191	-3.27732	-3.28825	-3.31458	-3.28764	-3.28542
hsa-miR-374b-3p	2.43e-05	0.00023796	1.15066	-3.08291	-3.10814	-3.01235	-3.03369	-3.07446	-3.09603	-3.22205	-3.13428	-3.27834	-3.32109	-3.32191	-3.27732	-3.28825	-3.31458	-3.28764	-3.28542
hsa-miR-374b-5p	2.43e-05	0.00023796	1.15066	-3.08291	-3.10814	-3.01235	-3.03369	-3.07446	-3.09603	-3.22205	-3.13428	-3.27834	-3.32109	-3.32191	-3.27732	-3.28825	-3.31458	-3.28764	-3.28542
hsa-miR-374c-3p	2.43e-05	0.00023796	1.15066	-3.08291	-3.10814	-3.01235	-3.03369	-3.07446	-3.09603	-3.22205	-3.13428	-3.27834	-3.32109	-3.32191	-3.27732	-3.28825	-3.31458	-3.28764	-3.28542
hsa-miR-374c-5p	2.43e-05	0.00023796	1.15066	-3.08291	-3.10814	-3.01235	-3.03369	-3.07446	-3.09603	-3.22205	-3.13428	-3.27834	-3.32109	-3.32191	-3.27732	-3.28825	-3.31458	-3.28764	-3.28542
hsa-miR-375	0.657789	0.82683	0.851881	-3.08291	-3.10814	-3.01235	-3.03369	-3.07446	-3.09603	-3.22205	-3.13428	-3.27834	-1.63667	-2.60828	-3.27732	-3.28825	-3.31458	-3.28764	-3.28542
hsa-miR-376a-2-5p	2.43e-05	0.00023796	1.15066	-3.08291	-3.10814	-3.01235	-3.03369	-3.07446	-3.09603	-3.22205	-3.13428	-3.27834	-3.32109	-3.32191	-3.27732	-3.28825	-3.31458	-3.28764	-3.28542
hsa-miR-376a-3p	2.43e-05	0.00023796	1.15066	-3.08291	-3.10814	-3.01235	-3.03369	-3.07446	-3.09603	-3.22205	-3.13428	-3.27834	-3.32109	-3.32191	-3.27732	-3.28825	-3.31458	-3.28764	-3.28542
hsa-miR-376a-5p	2.43e-05	0.00023796	1.15066	-3.08291	-3.10814	-3.01235	-3.03369	-3.07446	-3.09603	-3.22205	-3.13428	-3.27834	-3.32109	-3.32191	-3.27732	-3.28825	-3.31458	-3.28764	-3.28542
hsa-miR-376b-3p	2.43e-05	0.00023796	1.15066	-3.08291	-3.10814	-3.01235	-3.03369	-3.07446	-3.09603	-3.22205	-3.13428	-3.27834	-3.32109	-3.32191	-3.27732	-3.28825	-3.31458	-3.28764	-3.28542
hsa-miR-376b-5p	2.43e-05	0.00023796	1.15066	-3.08291	-3.10814	-3.01235	-3.03369	-3.07446	-3.09603	-3.22205	-3.13428	-3.27834	-3.32109	-3.32191	-3.27732	-3.28825	-3.31458	-3.28764	-3.28542
hsa-miR-376c-3p	2.43e-05	0.00023796	1.15066	-3.08291	-3.10814	-3.01235	-3.03369	-3.07446	-3.09603	-3.22205	-3.13428	-3.27834	-3.32109	-3.32191	-3.27732	-3.28825	-3.31458	-3.28764	-3.28542
hsa-miR-376c-5p	2.43e-05	0.00023796	1.15066	-3.08291	-3.10814	-3.01235	-3.03369	-3.07446	-3.09603	-3.22205	-3.13428	-3.27834	-3.32109	-3.32191	-3.27732	-3.28825	-3.31458	-3.28764	-3.28542
hsa-miR-377-3p	2.43e-05	0.00023796	1.15066	-3.08291	-3.10814	-3.01235	-3.03369	-3.07446	-3.09603	-3.22205	-3.13428	-3.27834	-3.32109	-3.32191	-3.27732	-3.28825	-3.31458	-3.28764	-3.28542
hsa-miR-377-5p	2.43e-05	0.00023796	1.15066	-3.08291	-3.10814	-3.01235	-3.03369	-3.07446	-3.09603	-3.22205	-3.13428	-3.27834	-3.32109	-3.32191	-3.27732	-3.28825	-3.31458	-3.28764	-3.28542
hsa-miR-378a-3p	2.43e-05	0.00023796	1.15066	-3.08291	-3.10814	-3.01235	-3.03369	-3.07446	-3.09603	-3.22205	-3.13428	-3.27834	-3.32109	-3.32191	-3.27732	-3.28825	-3.31458	-3.28764	-3.28542
hsa-miR-378a-5p	2.43e-05	0.00023796	1.15066	-3.08291	-3.10814	-3.01235	-3.03369	-3.07446	-3.09603	-3.22205	-3.13428	-3.27834	-3.32109	-3.32191	-3.27732	-3.28825	-3.31458	-3.28764	-3.28542
hsa-miR-378b	0.293675	0.331385	1.06027	-3.08291	-3.10814	-3.01235	-3.03369	-3.07446	-3.09603	-3.22205	-3.13428	-3.27834	-3.32109	-2.5614	-3.27732	-3.28825	-3.31458	-3.28764	-3.28542
hsa-miR-378c	2.43e-05	0.00023796	1.15066	-3.08291	-3.10814	-3.01235	-3.03369	-3.07446	-3.09603	-3.22205	-3.13428	-3.27834	-3.32109	-3.32191	-3.27732	-3.28825	-3.31458	-3.28764	-3.28542
hsa-miR-378d	2.43e-05	0.00023796	1.15066	-3.08291	-3.10814	-3.01235	-3.03369	-3.07446	-3.09603	-3.22205	-3.13428	-3.27834	-3.32109	-3.32191	-3.27732	-3.28825	-3.31458	-3.28764	-3.28542
hsa-miR-378e	2.43e-05	0.00023796	1.15066	-3.08291	-3.10814	-3.01235	-3.03369	-3.07446	-3.09603	-3.22205	-3.13428	-3.27834	-3.32109	-3.32191	-3.27732	-3.28825	-3.31458	-3.28764	-3.28542
hsa-miR-378f	2.43e-05	0.00023796	1.15066	-3.08291	-3.10814	-3.01235	-3.03369	-3.07446	-3.09603	-3.22205	-3.13428	-3.27834	-3.32109	-3.32191	-3.27732	-3.28825	-3.31458	-3.28764	-3.28542
hsa-miR-378g	2.43e-05	0.00023796	1.15066	-3.08291	-3.10814	-3.01235	-3.03369	-3.07446	-3.09603	-3.22205	-3.13428	-3.27834	-3.32109	-3.32191	-3.27732	-3.28825	-3.31458	-3.28764	-3.28542
hsa-miR-378h	2.43e-05	0.00023796	1.15066	-3.08291	-3.10814	-3.01235	-3.03369	-3.07446	-3.09603	-3.22205	-3.13428	-3.27834	-3.32109	-3.32191	-3.27732	-3.28825	-3.31458	-3.28764	-3.28542
hsa-miR-378i	2.43e-05	0.00023796	1.15066	-3.08291	-3.10814	-3.01235	-3.03369	-3.07446	-3.09603	-3.22205	-3.13428	-3.27834	-3.32109	-3.32191	-3.27732	-3.28825	-3.31458	-3.28764	-3.28542
hsa-miR-378j	2.43e-05	0.00023796	1.15066	-3.08291	-3.10814	-3.01235	-3.03369	-3.07446	-3.09603	-3.22205	-3.13428	-3.27834	-3.32109	-3.32191	-3.27732	-3.28825	-3.31458	-3.28764	-3.28542
hsa-miR-379-3p	2.43e-05	0.00023796	1.15066	-3.08291	-3.10814	-3.01235	-3.03369	-3.07446	-3.09603	-3.22205	-3.13428	-3.27834	-3.32109	-3.32191	-3.27732	-3.28825	-3.31458	-3.28764	-3.28542
hsa-miR-379-5p	2.43e-05	0.00023796	1.15066	-3.08291	-3.10814	-3.01235	-3.03369	-3.07446	-3.09603	-3.22205	-3.13428	-3.27834	-3.32109	-3.32191	-3.27732	-3.28825	-3.31458	-3.28764	-3.28542
hsa-miR-380-3p	2.43e-05	0.00023796	1.15066	-3.08291	-3.10814	-3.01235	-3.03369	-3.07446	-3.09603	-3.22205	-3.13428	-3.27834	-3.32109	-3.32191	-3.27732	-3.28825	-3.31458	-3.28764	-3.28542
hsa-miR-380-5p	2.43e-05	0.00023796	1.15066	-3.08291	-3.10814	-3.01235	-3.03369	-3.07446	-3.09603	-3.22205	-3.13428	-3.27834	-3.32109	-3.32191	-3.27732	-3.28825	-3.31458	-3.28764	-3.28542
hsa-miR-381-3p	2.43e-05	0.00023796	1.15066	-3.08291	-3.10814	-3.01235	-3.03369	-3.07446	-3.09603	-3.22205	-3.13428	-3.27834	-3.32109	-3.32191	-3.27732	-3.28825	-3.31458	-3.28764	-3.28542
hsa-miR-381-5p	2.43e-05	0.00023796	1.15066	-3.08291	-3.10814	-3.01235	-3.03369	-3.07446	-3.09603	-3.22205	-3.13428	-3.27834	-3.32109	-3.32191	-3.27732	-3.28825	-3.31458	-3.28764	-3.28542
hsa-miR-382-3p	2.43e-05	0.00023796	1.15066	-3.08291	-3.10814	-3.01235	-3.03369	-3.07446	-3.09603	-3.22205	-3.13428	-3.27834	-3.32109	-3.32191	-3.27732	-3.28825	-3.31458	-3.28764	-3.28542
hsa-miR-382-5p	2.43e-05	0.00023796	1.15066	-3.08291	-3.10814	-3.01235	-3.03369	-3.07446	-3.09603	-3.22205	-3.13428	-3.27834	-3.32109	-3.32191	-3.27732	-3.28825	-3.31458	-3.28764	-3.28542
hsa-miR-383	2.43e-05	0.00023796	1.15066	-3.08291	-3.10814	-3.01235	-3.03369	-3.07446	-3.09603	-3.22205	-3.13428	-3.27834	-3.32109	-3.32191	-3.27732	-3.28825	-3.31458	-3.28764	-3.28542
hsa-miR-384	2.43e-05	0.00023796	1.15066	-3.08291	-3.10814	-3.01235	-3.03369	-3.07446	-3.09603	-3.22205	-3.13428	-3.27834	-3.32109	-3.32191	-3.27732	-3.28825	-3.31458	-3.28764	-3.28542
hsa-miR-3907	2.43e-05	0.00023796	1.15066	-3.08291	-3.10814	-3.01235	-3.03369	-3.07446	-3.09603	-3.22205	-3.13428	-3.27834	-3.32109	-3.32191	-3.27732	-3.28825	-3.31458	-3.28764	-3.28542
hsa-miR-3908	2.43e-05	0.00023796	1.15066	-3.08291	-3.10814	-3.01235	-3.03369	-3.07446	-3.09603	-3.22205	-3.13428	-3.27834	-3.32109	-3.32191	-3.27732	-3.28825	-3.31458	-3.28764	-3.28542
hsa-miR-3909	2.43e-05	0.00023796	1.15066	-3.08291	-3.10814	-3.01235	-3.03369	-3.07446	-3.09603	-3.22205	-3.13428	-3.27834	-3.32109	-3.32191	-3.27732	-3.28825	-3.31458	-3.28764	-3.28542
hsa-miR-3910	2.43e-05	0.00023796	1.15066	-3.08291	-3.10814	-3.01235	-3.03369	-3.07446	-3.09603	-3.22205	-3.13428	-3.27834	-3.32109	-3.32191	-3.27732	-3.28825	-3.31458	-3.28764	-3.28542
hsa-miR-3911	0.0885811	0.09021	0.431009	-3.08291	-3.10814	-3.01235	-3.03369	-3.07446	-3.09603	-0.215514	-3.13428	-3.27834	-2.43445	-2.39389	-3.27732	0.160329	-0.839665	-0.0352333	-0.536773
hsa-miR-3912	2.43e-05	0.00023796	1.15066	-3.08291	-3.10814	-3.01235	-3.03369	-3.07446	-3.09603	-3.22205	-3.13428	-3.27834	-3.32109	-3.32191	-3.27732	-3.28825	-3.31458	-3.28764	-3.28542
hsa-miR-3913-3p	2.43e-05	0.00023796	1.15066	-3.08291	-3.10814	-3.01235	-3.03369	-3.07446	-3.09603	-3.22205	-3.13428	-3.27834	-3.32109	-3.32191	-3.27732	-3.28825	-3.31458	-3.28764	-3.28542
hsa-miR-3913-5p	2.43e-05	0.00023796	1.15066	-3.08291	-3.10814	-3.01235	-3.03369	-3.07446	-3.09603	-3.22205	-3.13428	-3.27834	-3.32109	-3.32191	-3.27732	-3.28825	-3.31458	-3.28764	-3.28542
hsa-miR-3914	2.43e-05	0.00023796	1.15066	-3.08291	-3.10814	-3.01235	-3.03369	-3.07446	-3.09603	-3.22205	-3.13428	-3.27834	-3.32109	-3.32191	-3.27732	-3.28825	-3.31458	-3.28764	-3.28542
hsa-miR-3915	2.43e-05	0.00023796	1.15066	-3.08291	-3.10814	-3.01235	-3.03369	-3.07446	-3.09603	-3.22205	-3.13428	-3.27834	-3.32109	-3.32191	-3.27732	-3.28825	-3.31458	-3.28764	-3.28542
hsa-miR-3916	2.43e-05	0.00023796	1.15066	-3.08291	-3.10814	-3.01235	-3.03369	-3.07446	-3.09603	-3.22205	-3.13428	-3.27834	-3.32109	-3.32191	-3.27732	-3.28825	-3.31458	-3.28764	-3.28542
hsa-miR-3917	2.43e-05	0.00023796	1.15066	-3.08291	-3.10814	-3.01235	-3.03369	-3.07446	-3.09603	-3.22205	-3.13428	-3.27834	-3.32109	-3.32191	-3.27732	-3.28825	-3.31458	-3.28764	-3.28542
hsa-miR-3918	2.43e-05	0.00023796	1.15066	-3.08291	-3.10814	-3.01235	-3.03369	-3.07446	-3.09603	-3.22205	-3.13428	-3.27834	-3.32109	-3.32191	-3.27732	-3.28825	-3.31458	-3.28764	-3.28542
hsa-miR-3919	2.43e-05	0.00023796	1.15066	-3.08291	-3.10814	-3.01235	-3.03369	-3.07446	-3.09603	-3.22205	-3.13428	-3.27834	-3.32109	-3.32191	-3.27732	-3.28825	-3.31458	-3.28764	-3.28542
hsa-miR-3920	2.43e-05	0.00023796	1.15066	-3.08291	-3.10814	-3.01235	-3.03369	-3.07446	-3.09603	-3.22205	-3.13428	-3.27834	-3.32109	-3.32191	-3.27732	-3.28825	-3.31458	-3.28764	-3.28542
hsa-miR-3921	2.43e-05	0.00023796	1.15066	-3.08291	-3.10814	-3.01235	-3.03369	-3.07446	-3.09603	-3.22205	-3.13428	-3.27834	-3.32109	-3.32191	-3.27732	-3.28825	-3.31458	-3.28764	-3.28542
hsa-miR-3922-3p	2.43e-05	0.00023796	1.15066	-3.08291	-3.10814	-3.01235	-3.03369	-3.07446	-3.09603	-3.22205	-3.13428	-3.27834	-3.32109	-3.32191	-3.27732	-3.28825	-3.31458	-3.28764	-3.28542
hsa-miR-3922-5p	2.43e-05	0.00023796	1.15066	-3.08291	-3.10814	-3.01235	-3.03369	-3.07446	-3.09603	-3.22205	-3.13428	-3.27834	-3.32109	-3.32191	-3.27732	-3.28825	-3.31458	-3.28764	-3.28542
hsa-miR-3923	2.43e-05	0.00023796	1.15066	-3.08291	-3.10814	-3.01235	-3.03369	-3.07446	-3.09603	-3.22205	-3.13428	-3.27834	-3.32109	-3.32191	-3.27732	-3.28825	-3.31458	-3.28764	-3.28542
hsa-miR-3924	2.43e-05	0.00023796	1.15066	-3.08291	-3.10814	-3.01235	-3.03369	-3.07446	-3.09603	-3.22205	-3.13428	-3.27834	-3.32109	-3.32191	-3.27732	-3.28825	-3.31458	-3.28764	-3.28542
hsa-miR-3925-3p	2.43e-05	0.00023796	1.15066	-3.08291	-3.10814	-3.01235	-3.03369	-3.07446	-3.09603	-3.22205	-3.13428	-3.27834	-3.32109	-3.32191	-3.27732	-3.28825	-3.31458	-3.28764	-3.28542
hsa-miR-3925-5p	2.43e-05	0.00023796	1.15066	-3.08291	-3.10814	-3.01235	-3.03369	-3.07446	-3.09603	-3.22205	-3.13428	-3.27834	-3.32109	-3.32191	-3.27732	-3.28825	-3.31458	-3.28764	-3.28542
hsa-miR-3926	2.43e-05	0.00023796	1.15066	-3.08291	-3.10814	-3.01235	-3.03369	-3.07446	-3.09603	-3.22205	-3.13428	-3.27834	-3.32109	-3.32191	-3.27732	-3.28825	-3.31458	-3.28764	-3.28542
hsa-miR-3927-3p	2.43e-05	0.00023796	1.15066	-3.08291	-3.10814	-3.01235	-3.03369	-3.07446	-3.09603	-3.22205	-3.13428	-3.27834	-3.32109	-3.32191	-3.27732	-3.28825	-3.31458	-3.28764	-3.28542
hsa-miR-3927-5p	2.43e-05	0.00023796	1.15066	-3.08291	-3.10814	-3.01235	-3.03369	-3.07446	-3.09603	-3.22205	-3.13428	-3.27834	-3.32109	-3.32191	-3.27732	-3.28825	-3.31458	-3.28764	-3.28542
hsa-miR-3928	2.43e-05	0.00023796	1.15066	-3.08291	-3.10814	-3.01235	-3.03369	-3.07446	-3.09603	-3.22205	-3.13428	-3.27834	-3.32109	-3.32191	-3.27732	-3.28825	-3.31458	-3.28764	-3.28542
hsa-miR-3929	2.43e-05	0.00023796	1.15066	-3.08291	-3.10814	-3.01235	-3.03369	-3.07446	-3.09603	-3.22205	-3.13428	-3.27834	-3.32109	-3.32191	-3.27732	-3.28825	-3.31458	-3.28764	-3.28542
hsa-miR-3934-3p	2.43e-05	0.00023796	1.15066	-3.08291	-3.10814	-3.01235	-3.03369	-3.07446	-3.09603	-3.22205	-3.13428	-3.27834	-3.32109	-3.32191	-3.27732	-3.28825	-3.31458	-3.28764	-3.28542
hsa-miR-3934-5p	2.43e-05	0.00023796	1.15066	-3.08291	-3.10814	-3.01235	-3.03369	-3.07446	-3.09603	-3.22205	-3.13428	-3.27834	-3.32109	-3.32191	-3.27732	-3.28825	-3.31458	-3.28764	-3.28542
hsa-miR-3935	2.43e-05	0.00023796	1.15066	-3.08291	-3.10814	-3.01235	-3.03369	-3.07446	-3.09603	-3.22205	-3.13428	-3.27834	-3.32109	-3.32191	-3.27732	-3.28825	-3.31458	-3.28764	-3.28542
hsa-miR-3936	2.43e-05	0.00023796	1.15066	-3.08291	-3.10814	-3.01235	-3.03369	-3.07446	-3.09603	-3.22205	-3.13428	-3.27834	-3.32109	-3.32191	-3.27732	-3.28825	-3.31458	-3.28764	-3.28542
hsa-miR-3937	0.00719772	0.00740819	0.314231	-3.08291	-3.10814	-3.01235	-3.03369	-3.07446	-3.09603	-3.22205	-3.13428	-3.27834	-1.89603	-1.12546	-3.27732	-0.611199	-1.58227	-0.883827	-0.950789
hsa-miR-3938	2.43e-05	0.00023796	1.15066	-3.08291	-3.10814	-3.01235	-3.03369	-3.07446	-3.09603	-3.22205	-3.13428	-3.27834	-3.32109	-3.32191	-3.27732	-3.28825	-3.31458	-3.28764	-3.28542
hsa-miR-3939	2.43e-05	0.00023796	1.15066	-3.08291	-3.10814	-3.01235	-3.03369	-3.07446	-3.09603	-3.22205	-3.13428	-3.27834	-3.32109	-3.32191	-3.27732	-3.28825	-3.31458	-3.28764	-3.28542
hsa-miR-3940-3p	2.43e-05	0.00023796	1.15066	-3.08291	-3.10814	-3.01235	-3.03369	-3.07446	-3.09603	-3.22205	-3.13428	-3.27834	-3.32109	-3.32191	-3.27732	-3.28825	-3.31458	-3.28764	-3.28542
hsa-miR-3940-5p	0.000260228	0.00158461	0.231242	-3.08291	-3.10814	-3.01235	-3.03369	-3.07446	-3.09603	0.419577	-3.13428	0.613855	0.135307	-0.215514	0.554514	-0.0168114	0.217976	0.110216	0.241488
hsa-miR-3941	2.43e-05	0.00023796	1.15066	-3.08291	-3.10814	-3.01235	-3.03369	-3.07446	-3.09603	-3.22205	-3.13428	-3.27834	-3.32109	-3.32191	-3.27732	-3.28825	-3.31458	-3.28764	-3.28542
hsa-miR-3942-3p	2.43e-05	0.00023796	1.15066	-3.08291	-3.10814	-3.01235	-3.03369	-3.07446	-3.09603	-3.22205	-3.13428	-3.27834	-3.32109	-3.32191	-3.27732	-3.28825	-3.31458	-3.28764	-3.28542
hsa-miR-3942-5p	2.43e-05	0.00023796	1.15066	-3.08291	-3.10814	-3.01235	-3.03369	-3.07446	-3.09603	-3.22205	-3.13428	-3.27834	-3.32109	-3.32191	-3.27732	-3.28825	-3.31458	-3.28764	-3.28542
hsa-miR-3943	2.43e-05	0.00023796	1.15066	-3.08291	-3.10814	-3.01235	-3.03369	-3.07446	-3.09603	-3.22205	-3.13428	-3.27834	-3.32109	-3.32191	-3.27732	-3.28825	-3.31458	-3.28764	-3.28542
hsa-miR-3944-3p	2.43e-05	0.00023796	1.15066	-3.08291	-3.10814	-3.01235	-3.03369	-3.07446	-3.09603	-3.22205	-3.13428	-3.27834	-3.32109	-3.32191	-3.27732	-3.28825	-3.31458	-3.28764	-3.28542
hsa-miR-3944-5p	2.43e-05	0.00023796	1.15066	-3.08291	-3.10814	-3.01235	-3.03369	-3.07446	-3.09603	-3.22205	-3.13428	-3.27834	-3.32109	-3.32191	-3.27732	-3.28825	-3.31458	-3.28764	-3.28542
hsa-miR-3945	2.43e-05	0.00023796	1.15066	-3.08291	-3.10814	-3.01235	-3.03369	-3.07446	-3.09603	-3.22205	-3.13428	-3.27834	-3.32109	-3.32191	-3.27732	-3.28825	-3.31458	-3.28764	-3.28542
hsa-miR-3960	0.325267	0.423245	1.26743	5.10015	5.80537	-3.01235	-3.03369	8.50142	7.29293	7.75402	7.29293	5.30778	5.30778	5.53619	5.10015	7.29293	7.75402	6.92169	6.92169
hsa-miR-3972	2.43e-05	0.00023796	1.15066	-3.08291	-3.10814	-3.01235	-3.03369	-3.07446	-3.09603	-3.22205	-3.13428	-3.27834	-3.32109	-3.32191	-3.27732	-3.28825	-3.31458	-3.28764	-3.28542
hsa-miR-3973	2.43e-05	0.00023796	1.15066	-3.08291	-3.10814	-3.01235	-3.03369	-3.07446	-3.09603	-3.22205	-3.13428	-3.27834	-3.32109	-3.32191	-3.27732	-3.28825	-3.31458	-3.28764	-3.28542
hsa-miR-3974	2.43e-05	0.00023796	1.15066	-3.08291	-3.10814	-3.01235	-3.03369	-3.07446	-3.09603	-3.22205	-3.13428	-3.27834	-3.32109	-3.32191	-3.27732	-3.28825	-3.31458	-3.28764	-3.28542
hsa-miR-3975	2.43e-05	0.00023796	1.15066	-3.08291	-3.10814	-3.01235	-3.03369	-3.07446	-3.09603	-3.22205	-3.13428	-3.27834	-3.32109	-3.32191	-3.27732	-3.28825	-3.31458	-3.28764	-3.28542
hsa-miR-3976	2.43e-05	0.00023796	1.15066	-3.08291	-3.10814	-3.01235	-3.03369	-3.07446	-3.09603	-3.22205	-3.13428	-3.27834	-3.32109	-3.32191	-3.27732	-3.28825	-3.31458	-3.28764	-3.28542
hsa-miR-3977	2.43e-05	0.00023796	1.15066	-3.08291	-3.10814	-3.01235	-3.03369	-3.07446	-3.09603	-3.22205	-3.13428	-3.27834	-3.32109	-3.32191	-3.27732	-3.28825	-3.31458	-3.28764	-3.28542
hsa-miR-3978	2.43e-05	0.00023796	1.15066	-3.08291	-3.10814	-3.01235	-3.03369	-3.07446	-3.09603	-3.22205	-3.13428	-3.27834	-3.32109	-3.32191	-3.27732	-3.28825	-3.31458	-3.28764	-3.28542
hsa-miR-409-3p	2.43e-05	0.00023796	1.15066	-3.08291	-3.10814	-3.01235	-3.03369	-3.07446	-3.09603	-3.22205	-3.13428	-3.27834	-3.32109	-3.32191	-3.27732	-3.28825	-3.31458	-3.28764	-3.28542
hsa-miR-409-5p	2.43e-05	0.00023796	1.15066	-3.08291	-3.10814	-3.01235	-3.03369	-3.07446	-3.09603	-3.22205	-3.13428	-3.27834	-3.32109	-3.32191	-3.27732	-3.28825	-3.31458	-3.28764	-3.28542
hsa-miR-410	2.43e-05	0.00023796	1.15066	-3.08291	-3.10814	-3.01235	-3.03369	-3.07446	-3.09603	-3.22205	-3.13428	-3.27834	-3.32109	-3.32191	-3.27732	-3.28825	-3.31458	-3.28764	-3.28542
hsa-miR-411-3p	2.43e-05	0.00023796	1.15066	-3.08291	-3.10814	-3.01235	-3.03369	-3.07446	-3.09603	-3.22205	-3.13428	-3.27834	-3.32109	-3.32191	-3.27732	-3.28825	-3.31458	-3.28764	-3.28542
hsa-miR-411-5p	2.43e-05	0.00023796	1.15066	-3.08291	-3.10814	-3.01235	-3.03369	-3.07446	-3.09603	-3.22205	-3.13428	-3.27834	-3.32109	-3.32191	-3.27732	-3.28825	-3.31458	-3.28764	-3.28542
hsa-miR-412	2.43e-05	0.00023796	1.15066	-3.08291	-3.10814	-3.01235	-3.03369	-3.07446	-3.09603	-3.22205	-3.13428	-3.27834	-3.32109	-3.32191	-3.27732	-3.28825	-3.31458	-3.28764	-3.28542
hsa-miR-421	2.43e-05	0.00023796	1.15066	-3.08291	-3.10814	-3.01235	-3.03369	-3.07446	-3.09603	-3.22205	-3.13428	-3.27834	-3.32109	-3.32191	-3.27732	-3.28825	-3.31458	-3.28764	-3.28542
hsa-miR-422a	2.43e-05	0.00023796	1.15066	-3.08291	-3.10814	-3.01235	-3.03369	-3.07446	-3.09603	-3.22205	-3.13428	-3.27834	-3.32109	-3.32191	-3.27732	-3.28825	-3.31458	-3.28764	-3.28542
hsa-miR-423-3p	2.43e-05	0.00023796	1.15066	-3.08291	-3.10814	-3.01235	-3.03369	-3.07446	-3.09603	-3.22205	-3.13428	-3.27834	-3.32109	-3.32191	-3.27732	-3.28825	-3.31458	-3.28764	-3.28542
hsa-miR-423-5p	0.25124	0.25291	0.726332	-3.08291	-3.10814	-3.01235	-3.03369	-3.07446	-3.09603	-3.22205	-3.13428	-3.27834	-2.49438	-2.86752	-3.27732	-3.28825	-2.5177	-3.28764	-1.35981
hsa-miR-424-3p	2.43e-05	0.00023796	1.15066	-3.08291	-3.10814	-3.01235	-3.03369	-3.07446	-3.09603	-3.22205	-3.13428	-3.27834	-3.32109	-3.32191	-3.27732	-3.28825	-3.31458	-3.28764	-3.28542
hsa-miR-424-5p	0.0953243	0.0957781	0.408782	-3.08291	-3.10814	-3.01235	-3.03369	-3.07446	-3.09603	-3.22205	-3.13428	-1.01727	-1.05899	-2.37031	-0.481298	-3.28825	-3.31458	-3.28764	-3.28542
hsa-miR-425-3p	2.43e-05	0.00023796	1.15066	-3.08291	-3.10814	-3.01235	-3.03369	-3.07446	-3.09603	-3.22205	-3.13428	-3.27834	-3.32109	-3.32191	-3.27732	-3.28825	-3.31458	-3.28764	-3.28542
hsa-miR-425-5p	0.227748	0.290061	0.540803	-3.08291	-3.10814	-3.01235	-3.03369	-3.07446	-3.09603	-3.22205	-3.13428	-3.27834	-0.913735	-2.4444	-0.980708	-3.28825	-3.31458	-3.28764	-3.28542
hsa-miR-4251	2.43e-05	0.00023796	1.15066	-3.08291	-3.10814	-3.01235	-3.03369	-3.07446	-3.09603	-3.22205	-3.13428	-3.27834	-3.32109	-3.32191	-3.27732	-3.28825	-3.31458	-3.28764	-3.28542
hsa-miR-4252	2.43e-05	0.00023796	1.15066	-3.08291	-3.10814	-3.01235	-3.03369	-3.07446	-3.09603	-3.22205	-3.13428	-3.27834	-3.32109	-3.32191	-3.27732	-3.28825	-3.31458	-3.28764	-3.28542
hsa-miR-4253	0.058356	0.0336406	0.327447	-3.08291	-3.10814	-3.01235	-3.03369	-3.07446	-3.09603	-3.22205	-3.13428	-3.27834	-3.32109	-2.49438	-3.27732	-0.0733799	-2.36566	-0.867033	-0.547165
hsa-miR-4254	2.43e-05	0.00023796	1.15066	-3.08291	-3.10814	-3.01235	-3.03369	-3.07446	-3.09603	-3.22205	-3.13428	-3.27834	-3.32109	-3.32191	-3.27732	-3.28825	-3.31458	-3.28764	-3.28542
hsa-miR-4255	2.43e-05	0.00023796	1.15066	-3.08291	-3.10814	-3.01235	-3.03369	-3.07446	-3.09603	-3.22205	-3.13428	-3.27834	-3.32109	-3.32191	-3.27732	-3.28825	-3.31458	-3.28764	-3.28542
hsa-miR-4256	2.43e-05	0.00023796	1.15066	-3.08291	-3.10814	-3.01235	-3.03369	-3.07446	-3.09603	-3.22205	-3.13428	-3.27834	-3.32109	-3.32191	-3.27732	-3.28825	-3.31458	-3.28764	-3.28542
hsa-miR-4257	0.000219608	0.00124339	0.259894	-3.08291	-3.10814	-3.01235	-3.03369	-3.07446	-3.09603	0.00774522	-3.13428	0.582132	0.204696	0.419577	-1.09583	-0.260423	-0.611199	-0.714654	-0.980708
hsa-miR-4258	2.43e-05	0.00023796	1.15066	-3.08291	-3.10814	-3.01235	-3.03369	-3.07446	-3.09603	-3.22205	-3.13428	-3.27834	-3.32109	-3.32191	-3.27732	-3.28825	-3.31458	-3.28764	-3.28542
hsa-miR-4259	2.43e-05	0.00023796	1.15066	-3.08291	-3.10814	-3.01235	-3.03369	-3.07446	-3.09603	-3.22205	-3.13428	-3.27834	-3.32109	-3.32191	-3.27732	-3.28825	-3.31458	-3.28764	-3.28542
hsa-miR-4260	2.43e-05	0.00023796	1.15066	-3.08291	-3.10814	-3.01235	-3.03369	-3.07446	-3.09603	-3.22205	-3.13428	-3.27834	-3.32109	-3.32191	-3.27732	-3.28825	-3.31458	-3.28764	-3.28542
hsa-miR-4261	2.43e-05	0.00023796	1.15066	-3.08291	-3.10814	-3.01235	-3.03369	-3.07446	-3.09603	-3.22205	-3.13428	-3.27834	-3.32109	-3.32191	-3.27732	-3.28825	-3.31458	-3.28764	-3.28542
hsa-miR-4262	2.43e-05	0.00023796	1.15066	-3.08291	-3.10814	-3.01235	-3.03369	-3.07446	-3.09603	-3.22205	-3.13428	-3.27834	-3.32109	-3.32191	-3.27732	-3.28825	-3.31458	-3.28764	-3.28542
hsa-miR-4263	2.43e-05	0.00023796	1.15066	-3.08291	-3.10814	-3.01235	-3.03369	-3.07446	-3.09603	-3.22205	-3.13428	-3.27834	-3.32109	-3.32191	-3.27732	-3.28825	-3.31458	-3.28764	-3.28542
hsa-miR-4264	2.43e-05	0.00023796	1.15066	-3.08291	-3.10814	-3.01235	-3.03369	-3.07446	-3.09603	-3.22205	-3.13428	-3.27834	-3.32109	-3.32191	-3.27732	-3.28825	-3.31458	-3.28764	-3.28542
hsa-miR-4265	2.43e-05	0.00023796	1.15066	-3.08291	-3.10814	-3.01235	-3.03369	-3.07446	-3.09603	-3.22205	-3.13428	-3.27834	-3.32109	-3.32191	-3.27732	-3.28825	-3.31458	-3.28764	-3.28542
hsa-miR-4266	2.43e-05	0.00023796	1.15066	-3.08291	-3.10814	-3.01235	-3.03369	-3.07446	-3.09603	-3.22205	-3.13428	-3.27834	-3.32109	-3.32191	-3.27732	-3.28825	-3.31458	-3.28764	-3.28542
hsa-miR-4267	2.43e-05	0.00023796	1.15066	-3.08291	-3.10814	-3.01235	-3.03369	-3.07446	-3.09603	-3.22205	-3.13428	-3.27834	-3.32109	-3.32191	-3.27732	-3.28825	-3.31458	-3.28764	-3.28542
hsa-miR-4268	2.43e-05	0.00023796	1.15066	-3.08291	-3.10814	-3.01235	-3.03369	-3.07446	-3.09603	-3.22205	-3.13428	-3.27834	-3.32109	-3.32191	-3.27732	-3.28825	-3.31458	-3.28764	-3.28542
hsa-miR-4269	2.43e-05	0.00023796	1.15066	-3.08291	-3.10814	-3.01235	-3.03369	-3.07446	-3.09603	-3.22205	-3.13428	-3.27834	-3.32109	-3.32191	-3.27732	-3.28825	-3.31458	-3.28764	-3.28542
hsa-miR-4270	0.183124	0.179411	3.12945	6.0381	-3.10814	-3.01235	-3.03369	-3.07446	-3.09603	2.07663	1.71325	-0.106771	0.383673	0.592514	0.479904	2.54588	1.28188	1.62399	2.8269
hsa-miR-4271	0.0451733	0.0444843	0.569916	-3.08291	-3.10814	-3.01235	-3.03369	-3.07446	-3.09603	1.22605	1.22605	0.289442	-0.231738	0.00774522	-3.27732	1.16172	0.184418	0.690492	0.373177
hsa-miR-4272	2.43e-05	0.00023796	1.15066	-3.08291	-3.10814	-3.01235	-3.03369	-3.07446	-3.09603	-3.22205	-3.13428	-3.27834	-3.32109	-3.32191	-3.27732	-3.28825	-3.31458	-3.28764	-3.28542
hsa-miR-4273	2.43e-05	0.00023796	1.15066	-3.08291	-3.10814	-3.01235	-3.03369	-3.07446	-3.09603	-3.22205	-3.13428	-3.27834	-3.32109	-3.32191	-3.27732	-3.28825	-3.31458	-3.28764	-3.28542
hsa-miR-4274	2.43e-05	0.00023796	1.15066	-3.08291	-3.10814	-3.01235	-3.03369	-3.07446	-3.09603	-3.22205	-3.13428	-3.27834	-3.32109	-3.32191	-3.27732	-3.28825	-3.31458	-3.28764	-3.28542
hsa-miR-4275	2.43e-05	0.00023796	1.15066	-3.08291	-3.10814	-3.01235	-3.03369	-3.07446	-3.09603	-3.22205	-3.13428	-3.27834	-3.32109	-3.32191	-3.27732	-3.28825	-3.31458	-3.28764	-3.28542
hsa-miR-4276	2.43e-05	0.00023796	1.15066	-3.08291	-3.10814	-3.01235	-3.03369	-3.07446	-3.09603	-3.22205	-3.13428	-3.27834	-3.32109	-3.32191	-3.27732	-3.28825	-3.31458	-3.28764	-3.28542
hsa-miR-4277	2.43e-05	0.00023796	1.15066	-3.08291	-3.10814	-3.01235	-3.03369	-3.07446	-3.09603	-3.22205	-3.13428	-3.27834	-3.32109	-3.32191	-3.27732	-3.28825	-3.31458	-3.28764	-3.28542
hsa-miR-4278	2.43e-05	0.00023796	1.15066	-3.08291	-3.10814	-3.01235	-3.03369	-3.07446	-3.09603	-3.22205	-3.13428	-3.27834	-3.32109	-3.32191	-3.27732	-3.28825	-3.31458	-3.28764	-3.28542
hsa-miR-4279	2.43e-05	0.00023796	1.15066	-3.08291	-3.10814	-3.01235	-3.03369	-3.07446	-3.09603	-3.22205	-3.13428	-3.27834	-3.32109	-3.32191	-3.27732	-3.28825	-3.31458	-3.28764	-3.28542
hsa-miR-4280	2.43e-05	0.00023796	1.15066	-3.08291	-3.10814	-3.01235	-3.03369	-3.07446	-3.09603	-3.22205	-3.13428	-3.27834	-3.32109	-3.32191	-3.27732	-3.28825	-3.31458	-3.28764	-3.28542
hsa-miR-4281	0.386063	0.445905	1.31164	3.94615	5.53619	-3.01235	-3.03369	6.603	6.603	6.603	6.92169	4.16951	4.0874	4.66501	4.35597	5.80537	5.69761	6.25201	6.603
hsa-miR-4282	2.43e-05	0.00023796	1.15066	-3.08291	-3.10814	-3.01235	-3.03369	-3.07446	-3.09603	-3.22205	-3.13428	-3.27834	-3.32109	-3.32191	-3.27732	-3.28825	-3.31458	-3.28764	-3.28542
hsa-miR-4283	2.43e-05	0.00023796	1.15066	-3.08291	-3.10814	-3.01235	-3.03369	-3.07446	-3.09603	-3.22205	-3.13428	-3.27834	-3.32109	-3.32191	-3.27732	-3.28825	-3.31458	-3.28764	-3.28542
hsa-miR-4284	0.728147	1	0.715008	-3.08291	-3.10814	-3.01235	-3.03369	-3.07446	-3.09603	-3.22205	-3.13428	-0.739123	-3.32109	-3.32191	-3.27732	-3.28825	-3.31458	-3.28764	-3.28542
hsa-miR-4285	2.43e-05	0.00023796	1.15066	-3.08291	-3.10814	-3.01235	-3.03369	-3.07446	-3.09603	-3.22205	-3.13428	-3.27834	-3.32109	-3.32191	-3.27732	-3.28825	-3.31458	-3.28764	-3.28542
hsa-miR-4286	0.1308	0.128702	0.417657	-3.08291	-3.10814	-3.01235	-3.03369	-3.07446	-3.09603	-3.22205	-3.13428	-1.13343	-1.90297	-2.55871	-0.0860332	-3.28825	-3.31458	-3.28764	-3.28542
hsa-miR-4287	2.43e-05	0.00023796	1.15066	-3.08291	-3.10814	-3.01235	-3.03369	-3.07446	-3.09603	-3.22205	-3.13428	-3.27834	-3.32109	-3.32191	-3.27732	-3.28825	-3.31458	-3.28764	-3.28542
hsa-miR-4288	2.43e-05	0.00023796	1.15066	-3.08291	-3.10814	-3.01235	-3.03369	-3.07446	-3.09603	-3.22205	-3.13428	-3.27834	-3.32109	-3.32191	-3.27732	-3.28825	-3.31458	-3.28764	-3.28542
hsa-miR-4289	2.43e-05	0.00023796	1.15066	-3.08291	-3.10814	-3.01235	-3.03369	-3.07446	-3.09603	-3.22205	-3.13428	-3.27834	-3.32109	-3.32191	-3.27732	-3.28825	-3.31458	-3.28764	-3.28542
hsa-miR-429	2.43e-05	0.00023796	1.15066	-3.08291	-3.10814	-3.01235	-3.03369	-3.07446	-3.09603	-3.22205	-3.13428	-3.27834	-3.32109	-3.32191	-3.27732	-3.28825	-3.31458	-3.28764	-3.28542
hsa-miR-4290	2.43e-05	0.00023796	1.15066	-3.08291	-3.10814	-3.01235	-3.03369	-3.07446	-3.09603	-3.22205	-3.13428	-3.27834	-3.32109	-3.32191	-3.27732	-3.28825	-3.31458	-3.28764	-3.28542
hsa-miR-4291	2.43e-05	0.00023796	1.15066	-3.08291	-3.10814	-3.01235	-3.03369	-3.07446	-3.09603	-3.22205	-3.13428	-3.27834	-3.32109	-3.32191	-3.27732	-3.28825	-3.31458	-3.28764	-3.28542
hsa-miR-4292	2.43e-05	0.00023796	1.15066	-3.08291	-3.10814	-3.01235	-3.03369	-3.07446	-3.09603	-3.22205	-3.13428	-3.27834	-3.32109	-3.32191	-3.27732	-3.28825	-3.31458	-3.28764	-3.28542
hsa-miR-4293	2.43e-05	0.00023796	1.15066	-3.08291	-3.10814	-3.01235	-3.03369	-3.07446	-3.09603	-3.22205	-3.13428	-3.27834	-3.32109	-3.32191	-3.27732	-3.28825	-3.31458	-3.28764	-3.28542
hsa-miR-4294	2.43e-05	0.00023796	1.15066	-3.08291	-3.10814	-3.01235	-3.03369	-3.07446	-3.09603	-3.22205	-3.13428	-3.27834	-3.32109	-3.32191	-3.27732	-3.28825	-3.31458	-3.28764	-3.28542
hsa-miR-4295	2.43e-05	0.00023796	1.15066	-3.08291	-3.10814	-3.01235	-3.03369	-3.07446	-3.09603	-3.22205	-3.13428	-3.27834	-3.32109	-3.32191	-3.27732	-3.28825	-3.31458	-3.28764	-3.28542
hsa-miR-4296	2.43e-05	0.00023796	1.15066	-3.08291	-3.10814	-3.01235	-3.03369	-3.07446	-3.09603	-3.22205	-3.13428	-3.27834	-3.32109	-3.32191	-3.27732	-3.28825	-3.31458	-3.28764	-3.28542
hsa-miR-4297	2.43e-05	0.00023796	1.15066	-3.08291	-3.10814	-3.01235	-3.03369	-3.07446	-3.09603	-3.22205	-3.13428	-3.27834	-3.32109	-3.32191	-3.27732	-3.28825	-3.31458	-3.28764	-3.28542
hsa-miR-4298	0.867628	0.87263	9.98088	-3.08291	-3.10814	-3.01235	-3.03369	6.92169	4.82129	5.10015	5.30778	-0.121499	0.217976	-0.0860332	-0.714654	2.47753	1.08346	2.94923	1.76003
hsa-miR-4299	0.424244	0.503353	1.04343	-3.08291	-3.10814	-3.01235	-3.03369	-3.07446	-3.09603	-3.22205	-3.13428	-3.27834	-2.4444	-3.32191	-3.27732	-3.28825	-3.31458	-3.28764	-3.28542
hsa-miR-4300	2.43e-05	0.00023796	1.15066	-3.08291	-3.10814	-3.01235	-3.03369	-3.07446	-3.09603	-3.22205	-3.13428	-3.27834	-3.32109	-3.32191	-3.27732	-3.28825	-3.31458	-3.28764	-3.28542
hsa-miR-4301	2.43e-05	0.00023796	1.15066	-3.08291	-3.10814	-3.01235	-3.03369	-3.07446	-3.09603	-3.22205	-3.13428	-3.27834	-3.32109	-3.32191	-3.27732	-3.28825	-3.31458	-3.28764	-3.28542
hsa-miR-4302	2.43e-05	0.00023796	1.15066	-3.08291	-3.10814	-3.01235	-3.03369	-3.07446	-3.09603	-3.22205	-3.13428	-3.27834	-3.32109	-3.32191	-3.27732	-3.28825	-3.31458	-3.28764	-3.28542
hsa-miR-4303	2.43e-05	0.00023796	1.15066	-3.08291	-3.10814	-3.01235	-3.03369	-3.07446	-3.09603	-3.22205	-3.13428	-3.27834	-3.32109	-3.32191	-3.27732	-3.28825	-3.31458	-3.28764	-3.28542
hsa-miR-4304	2.43e-05	0.00023796	1.15066	-3.08291	-3.10814	-3.01235	-3.03369	-3.07446	-3.09603	-3.22205	-3.13428	-3.27834	-3.32109	-3.32191	-3.27732	-3.28825	-3.31458	-3.28764	-3.28542
hsa-miR-4305	2.43e-05	0.00023796	1.15066	-3.08291	-3.10814	-3.01235	-3.03369	-3.07446	-3.09603	-3.22205	-3.13428	-3.27834	-3.32109	-3.32191	-3.27732	-3.28825	-3.31458	-3.28764	-3.28542
hsa-miR-4306	0.33433	0.330242	0.777423	-3.08291	-3.10814	-3.01235	-3.03369	-3.07446	-3.09603	-3.22205	-3.13428	-3.27834	-1.64242	-2.43162	-3.27732	-3.28825	-2.4286	-3.28764	-3.28542
hsa-miR-4307	2.43e-05	0.00023796	1.15066	-3.08291	-3.10814	-3.01235	-3.03369	-3.07446	-3.09603	-3.22205	-3.13428	-3.27834	-3.32109	-3.32191	-3.27732	-3.28825	-3.31458	-3.28764	-3.28542
hsa-miR-4308	2.43e-05	0.00023796	1.15066	-3.08291	-3.10814	-3.01235	-3.03369	-3.07446	-3.09603	-3.22205	-3.13428	-3.27834	-3.32109	-3.32191	-3.27732	-3.28825	-3.31458	-3.28764	-3.28542
hsa-miR-4309	2.43e-05	0.00023796	1.15066	-3.08291	-3.10814	-3.01235	-3.03369	-3.07446	-3.09603	-3.22205	-3.13428	-3.27834	-3.32109	-3.32191	-3.27732	-3.28825	-3.31458	-3.28764	-3.28542
hsa-miR-431-3p	2.43e-05	0.00023796	1.15066	-3.08291	-3.10814	-3.01235	-3.03369	-3.07446	-3.09603	-3.22205	-3.13428	-3.27834	-3.32109	-3.32191	-3.27732	-3.28825	-3.31458	-3.28764	-3.28542
hsa-miR-431-5p	2.43e-05	0.00023796	1.15066	-3.08291	-3.10814	-3.01235	-3.03369	-3.07446	-3.09603	-3.22205	-3.13428	-3.27834	-3.32109	-3.32191	-3.27732	-3.28825	-3.31458	-3.28764	-3.28542
hsa-miR-4310	2.43e-05	0.00023796	1.15066	-3.08291	-3.10814	-3.01235	-3.03369	-3.07446	-3.09603	-3.22205	-3.13428	-3.27834	-3.32109	-3.32191	-3.27732	-3.28825	-3.31458	-3.28764	-3.28542
hsa-miR-4311	2.43e-05	0.00023796	1.15066	-3.08291	-3.10814	-3.01235	-3.03369	-3.07446	-3.09603	-3.22205	-3.13428	-3.27834	-3.32109	-3.32191	-3.27732	-3.28825	-3.31458	-3.28764	-3.28542
hsa-miR-4312	2.43e-05	0.00023796	1.15066	-3.08291	-3.10814	-3.01235	-3.03369	-3.07446	-3.09603	-3.22205	-3.13428	-3.27834	-3.32109	-3.32191	-3.27732	-3.28825	-3.31458	-3.28764	-3.28542
hsa-miR-4313	2.43e-05	0.00023796	1.15066	-3.08291	-3.10814	-3.01235	-3.03369	-3.07446	-3.09603	-3.22205	-3.13428	-3.27834	-3.32109	-3.32191	-3.27732	-3.28825	-3.31458	-3.28764	-3.28542
hsa-miR-4314	2.43e-05	0.00023796	1.15066	-3.08291	-3.10814	-3.01235	-3.03369	-3.07446	-3.09603	-3.22205	-3.13428	-3.27834	-3.32109	-3.32191	-3.27732	-3.28825	-3.31458	-3.28764	-3.28542
hsa-miR-4315	2.43e-05	0.00023796	1.15066	-3.08291	-3.10814	-3.01235	-3.03369	-3.07446	-3.09603	-3.22205	-3.13428	-3.27834	-3.32109	-3.32191	-3.27732	-3.28825	-3.31458	-3.28764	-3.28542
hsa-miR-4316	2.43e-05	0.00023796	1.15066	-3.08291	-3.10814	-3.01235	-3.03369	-3.07446	-3.09603	-3.22205	-3.13428	-3.27834	-3.32109	-3.32191	-3.27732	-3.28825	-3.31458	-3.28764	-3.28542
hsa-miR-4317	2.43e-05	0.00023796	1.15066	-3.08291	-3.10814	-3.01235	-3.03369	-3.07446	-3.09603	-3.22205	-3.13428	-3.27834	-3.32109	-3.32191	-3.27732	-3.28825	-3.31458	-3.28764	-3.28542
hsa-miR-4318	2.43e-05	0.00023796	1.15066	-3.08291	-3.10814	-3.01235	-3.03369	-3.07446	-3.09603	-3.22205	-3.13428	-3.27834	-3.32109	-3.32191	-3.27732	-3.28825	-3.31458	-3.28764	-3.28542
hsa-miR-4319	2.43e-05	0.00023796	1.15066	-3.08291	-3.10814	-3.01235	-3.03369	-3.07446	-3.09603	-3.22205	-3.13428	-3.27834	-3.32109	-3.32191	-3.27732	-3.28825	-3.31458	-3.28764	-3.28542
hsa-miR-432-3p	2.43e-05	0.00023796	1.15066	-3.08291	-3.10814	-3.01235	-3.03369	-3.07446	-3.09603	-3.22205	-3.13428	-3.27834	-3.32109	-3.32191	-3.27732	-3.28825	-3.31458	-3.28764	-3.28542
hsa-miR-432-5p	2.43e-05	0.00023796	1.15066	-3.08291	-3.10814	-3.01235	-3.03369	-3.07446	-3.09603	-3.22205	-3.13428	-3.27834	-3.32109	-3.32191	-3.27732	-3.28825	-3.31458	-3.28764	-3.28542
hsa-miR-4320	2.43e-05	0.00023796	1.15066	-3.08291	-3.10814	-3.01235	-3.03369	-3.07446	-3.09603	-3.22205	-3.13428	-3.27834	-3.32109	-3.32191	-3.27732	-3.28825	-3.31458	-3.28764	-3.28542
hsa-miR-4321	2.43e-05	0.00023796	1.15066	-3.08291	-3.10814	-3.01235	-3.03369	-3.07446	-3.09603	-3.22205	-3.13428	-3.27834	-3.32109	-3.32191	-3.27732	-3.28825	-3.31458	-3.28764	-3.28542
hsa-miR-4322	2.43e-05	0.00023796	1.15066	-3.08291	-3.10814	-3.01235	-3.03369	-3.07446	-3.09603	-3.22205	-3.13428	-3.27834	-3.32109	-3.32191	-3.27732	-3.28825	-3.31458	-3.28764	-3.28542
hsa-miR-4323	0.130265	0.00023796	9.95464	2.70544	-3.10814	-3.01235	-3.03369	-3.07446	-3.09603	-0.200924	-3.13428	-3.27834	-3.32109	-3.32191	-3.27732	-3.28825	-3.31458	-3.28764	-3.28542
hsa-miR-4324	2.43e-05	0.00023796	1.15066	-3.08291	-3.10814	-3.01235	-3.03369	-3.07446	-3.09603	-3.22205	-3.13428	-3.27834	-3.32109	-3.32191	-3.27732	-3.28825	-3.31458	-3.28764	-3.28542
hsa-miR-4325	2.43e-05	0.00023796	1.15066	-3.08291	-3.10814	-3.01235	-3.03369	-3.07446	-3.09603	-3.22205	-3.13428	-3.27834	-3.32109	-3.32191	-3.27732	-3.28825	-3.31458	-3.28764	-3.28542
hsa-miR-4326	2.43e-05	0.00023796	1.15066	-3.08291	-3.10814	-3.01235	-3.03369	-3.07446	-3.09603	-3.22205	-3.13428	-3.27834	-3.32109	-3.32191	-3.27732	-3.28825	-3.31458	-3.28764	-3.28542
hsa-miR-4327	1.98e-05	0.000652454	0.0790481	-3.08291	-3.10814	-3.01235	-3.03369	-3.07446	-3.09603	0.709997	-3.13428	0.747469	3.41867	3.20967	0.25626	0.479904	0.747469	1.05464	1.68692
hsa-miR-4328	2.43e-05	0.00023796	1.15066	-3.08291	-3.10814	-3.01235	-3.03369	-3.07446	-3.09603	-3.22205	-3.13428	-3.27834	-3.32109	-3.32191	-3.27732	-3.28825	-3.31458	-3.28764	-3.28542
hsa-miR-4329	2.43e-05	0.00023796	1.15066	-3.08291	-3.10814	-3.01235	-3.03369	-3.07446	-3.09603	-3.22205	-3.13428	-3.27834	-3.32109	-3.32191	-3.27732	-3.28825	-3.31458	-3.28764	-3.28542
hsa-miR-433	2.43e-05	0.00023796	1.15066	-3.08291	-3.10814	-3.01235	-3.03369	-3.07446	-3.09603	-3.22205	-3.13428	-3.27834	-3.32109	-3.32191	-3.27732	-3.28825	-3.31458	-3.28764	-3.28542
hsa-miR-4330	2.43e-05	0.00023796	1.15066	-3.08291	-3.10814	-3.01235	-3.03369	-3.07446	-3.09603	-3.22205	-3.13428	-3.27834	-3.32109	-3.32191	-3.27732	-3.28825	-3.31458	-3.28764	-3.28542
hsa-miR-4417	0.434956	0.53142	1.04206	-3.08291	-3.10814	-3.01235	-3.03369	-3.07446	-3.09603	-3.22205	-3.13428	-3.27834	-3.32109	-3.32191	-3.27732	-3.28825	-2.43162	-3.28764	-3.28542
hsa-miR-4418	2.43e-05	0.00023796	1.15066	-3.08291	-3.10814	-3.01235	-3.03369	-3.07446	-3.09603	-3.22205	-3.13428	-3.27834	-3.32109	-3.32191	-3.27732	-3.28825	-3.31458	-3.28764	-3.28542
hsa-miR-4419a	0.0171807	0.00740819	0.356061	-3.08291	-3.10814	-3.01235	-3.03369	-3.07446	-3.09603	-3.22205	-3.13428	-3.27834	-2.46179	-2.48832	-3.27732	-0.980708	-0.760021	-1.09095	-1.00494
hsa-miR-4419b	2.43e-05	0.00023796	1.15066	-3.08291	-3.10814	-3.01235	-3.03369	-3.07446	-3.09603	-3.22205	-3.13428	-3.27834	-3.32109	-3.32191	-3.27732	-3.28825	-3.31458	-3.28764	-3.28542
hsa-miR-4420	2.43e-05	0.00023796	1.15066	-3.08291	-3.10814	-3.01235	-3.03369	-3.07446	-3.09603	-3.22205	-3.13428	-3.27834	-3.32109	-3.32191	-3.27732	-3.28825	-3.31458	-3.28764	-3.28542
hsa-miR-4421	2.43e-05	0.00023796	1.15066	-3.08291	-3.10814	-3.01235	-3.03369	-3.07446	-3.09603	-3.22205	-3.13428	-3.27834	-3.32109	-3.32191	-3.27732	-3.28825	-3.31458	-3.28764	-3.28542
hsa-miR-4422	2.43e-05	0.00023796	1.15066	-3.08291	-3.10814	-3.01235	-3.03369	-3.07446	-3.09603	-3.22205	-3.13428	-3.27834	-3.32109	-3.32191	-3.27732	-3.28825	-3.31458	-3.28764	-3.28542
hsa-miR-4423-3p	2.43e-05	0.00023796	1.15066	-3.08291	-3.10814	-3.01235	-3.03369	-3.07446	-3.09603	-3.22205	-3.13428	-3.27834	-3.32109	-3.32191	-3.27732	-3.28825	-3.31458	-3.28764	-3.28542
hsa-miR-4423-5p	2.43e-05	0.00023796	1.15066	-3.08291	-3.10814	-3.01235	-3.03369	-3.07446	-3.09603	-3.22205	-3.13428	-3.27834	-3.32109	-3.32191	-3.27732	-3.28825	-3.31458	-3.28764	-3.28542
hsa-miR-4424	2.43e-05	0.00023796	1.15066	-3.08291	-3.10814	-3.01235	-3.03369	-3.07446	-3.09603	-3.22205	-3.13428	-3.27834	-3.32109	-3.32191	-3.27732	-3.28825	-3.31458	-3.28764	-3.28542
hsa-miR-4425	2.43e-05	0.00023796	1.15066	-3.08291	-3.10814	-3.01235	-3.03369	-3.07446	-3.09603	-3.22205	-3.13428	-3.27834	-3.32109	-3.32191	-3.27732	-3.28825	-3.31458	-3.28764	-3.28542
hsa-miR-4426	2.43e-05	0.00023796	1.15066	-3.08291	-3.10814	-3.01235	-3.03369	-3.07446	-3.09603	-3.22205	-3.13428	-3.27834	-3.32109	-3.32191	-3.27732	-3.28825	-3.31458	-3.28764	-3.28542
hsa-miR-4427	2.43e-05	0.00023796	1.15066	-3.08291	-3.10814	-3.01235	-3.03369	-3.07446	-3.09603	-3.22205	-3.13428	-3.27834	-3.32109	-3.32191	-3.27732	-3.28825	-3.31458	-3.28764	-3.28542
hsa-miR-4428	2.43e-05	0.00023796	1.15066	-3.08291	-3.10814	-3.01235	-3.03369	-3.07446	-3.09603	-3.22205	-3.13428	-3.27834	-3.32109	-3.32191	-3.27732	-3.28825	-3.31458	-3.28764	-3.28542
hsa-miR-4429	2.43e-05	0.00023796	1.15066	-3.08291	-3.10814	-3.01235	-3.03369	-3.07446	-3.09603	-3.22205	-3.13428	-3.27834	-3.32109	-3.32191	-3.27732	-3.28825	-3.31458	-3.28764	-3.28542
hsa-miR-4430	0.0649832	0.0320733	0.29781	-3.08291	-3.10814	-3.01235	-3.03369	-3.07446	-3.09603	-3.22205	-3.13428	-3.27834	-2.41445	-2.43931	-3.27732	-0.70035	0.479904	-3.28764	-1.13646
hsa-miR-4431	2.43e-05	0.00023796	1.15066	-3.08291	-3.10814	-3.01235	-3.03369	-3.07446	-3.09603	-3.22205	-3.13428	-3.27834	-3.32109	-3.32191	-3.27732	-3.28825	-3.31458	-3.28764	-3.28542
hsa-miR-4432	2.43e-05	0.00023796	1.15066	-3.08291	-3.10814	-3.01235	-3.03369	-3.07446	-3.09603	-3.22205	-3.13428	-3.27834	-3.32109	-3.32191	-3.27732	-3.28825	-3.31458	-3.28764	-3.28542
hsa-miR-4433-3p	0.00044958	0.00164234	0.281923	-3.08291	-3.10814	-3.01235	-3.03369	-3.07446	-3.09603	0.442089	-3.13428	-0.725495	-0.760021	-0.559837	-0.200924	0.135307	0.383673	0.313855	0.456188
hsa-miR-4433-5p	0.00821064	0.00497114	65.0751	4.35597	3.30968	6.25201	6.92169	3.14937	-3.09603	0.582132	0.999929	-0.183868	-2.5177	-2.48492	-0.950789	-0.897512	-2.38936	-0.739123	-0.70035
hsa-miR-4434	2.43e-05	0.00023796	1.15066	-3.08291	-3.10814	-3.01235	-3.03369	-3.07446	-3.09603	-3.22205	-3.13428	-3.27834	-3.32109	-3.32191	-3.27732	-3.28825	-3.31458	-3.28764	-3.28542
hsa-miR-4435	2.43e-05	0.00023796	1.15066	-3.08291	-3.10814	-3.01235	-3.03369	-3.07446	-3.09603	-3.22205	-3.13428	-3.27834	-3.32109	-3.32191	-3.27732	-3.28825	-3.31458	-3.28764	-3.28542
hsa-miR-4436a	2.43e-05	0.00023796	1.15066	-3.08291	-3.10814	-3.01235	-3.03369	-3.07446	-3.09603	-3.22205	-3.13428	-3.27834	-3.32109	-3.32191	-3.27732	-3.28825	-3.31458	-3.28764	-3.28542
hsa-miR-4436b-3p	2.43e-05	0.00023796	1.15066	-3.08291	-3.10814	-3.01235	-3.03369	-3.07446	-3.09603	-3.22205	-3.13428	-3.27834	-3.32109	-3.32191	-3.27732	-3.28825	-3.31458	-3.28764	-3.28542
hsa-miR-4436b-5p	0.340997	0.420183	0.788971	-3.08291	-3.10814	-3.01235	-3.03369	-3.07446	-3.09603	-3.22205	-3.13428	-3.27834	-2.88417	-3.01848	-3.27732	-1.62353	-2.37521	-3.28764	-3.28542
hsa-miR-4437	2.43e-05	0.00023796	1.15066	-3.08291	-3.10814	-3.01235	-3.03369	-3.07446	-3.09603	-3.22205	-3.13428	-3.27834	-3.32109	-3.32191	-3.27732	-3.28825	-3.31458	-3.28764	-3.28542
hsa-miR-4438	2.43e-05	0.00023796	1.15066	-3.08291	-3.10814	-3.01235	-3.03369	-3.07446	-3.09603	-3.22205	-3.13428	-3.27834	-3.32109	-3.32191	-3.27732	-3.28825	-3.31458	-3.28764	-3.28542
hsa-miR-4439	2.43e-05	0.00023796	1.15066	-3.08291	-3.10814	-3.01235	-3.03369	-3.07446	-3.09603	-3.22205	-3.13428	-3.27834	-3.32109	-3.32191	-3.27732	-3.28825	-3.31458	-3.28764	-3.28542
hsa-miR-4440	2.43e-05	0.00023796	1.15066	-3.08291	-3.10814	-3.01235	-3.03369	-3.07446	-3.09603	-3.22205	-3.13428	-3.27834	-3.32109	-3.32191	-3.27732	-3.28825	-3.31458	-3.28764	-3.28542
hsa-miR-4441	2.43e-05	0.00023796	1.15066	-3.08291	-3.10814	-3.01235	-3.03369	-3.07446	-3.09603	-3.22205	-3.13428	-3.27834	-3.32109	-3.32191	-3.27732	-3.28825	-3.31458	-3.28764	-3.28542
hsa-miR-4442	1.55e-05	0.000297097	0.102652	-3.08291	-3.10814	-3.01235	-3.03369	-3.07446	-3.09603	0.456188	-3.13428	-0.215514	0.747469	1.22605	0.592514	3.14937	0.592514	1.22605	1.22605
hsa-miR-4443	0.0942064	0.0840186	1.23498	5.69761	-3.10814	-3.01235	-3.03369	-3.07446	2.54588	1.16172	2.14251	0.709997	2.14251	0.631801	1.71325	3.02036	3.60188	3.60188	3.20967
hsa-miR-4444	2.43e-05	0.00023796	1.15066	-3.08291	-3.10814	-3.01235	-3.03369	-3.07446	-3.09603	-3.22205	-3.13428	-3.27834	-3.32109	-3.32191	-3.27732	-3.28825	-3.31458	-3.28764	-3.28542
hsa-miR-4445-3p	2.43e-05	0.00023796	1.15066	-3.08291	-3.10814	-3.01235	-3.03369	-3.07446	-3.09603	-3.22205	-3.13428	-3.27834	-3.32109	-3.32191	-3.27732	-3.28825	-3.31458	-3.28764	-3.28542
hsa-miR-4445-5p	2.43e-05	0.00023796	1.15066	-3.08291	-3.10814	-3.01235	-3.03369	-3.07446	-3.09603	-3.22205	-3.13428	-3.27834	-3.32109	-3.32191	-3.27732	-3.28825	-3.31458	-3.28764	-3.28542
hsa-miR-4446-3p	2.43e-05	0.00023796	1.15066	-3.08291	-3.10814	-3.01235	-3.03369	-3.07446	-3.09603	-3.22205	-3.13428	-3.27834	-3.32109	-3.32191	-3.27732	-3.28825	-3.31458	-3.28764	-3.28542
hsa-miR-4446-5p	2.43e-05	0.00023796	1.15066	-3.08291	-3.10814	-3.01235	-3.03369	-3.07446	-3.09603	-3.22205	-3.13428	-3.27834	-3.32109	-3.32191	-3.27732	-3.28825	-3.31458	-3.28764	-3.28542
hsa-miR-4447	2.43e-05	0.00023796	1.15066	-3.08291	-3.10814	-3.01235	-3.03369	-3.07446	-3.09603	-3.22205	-3.13428	-3.27834	-3.32109	-3.32191	-3.27732	-3.28825	-3.31458	-3.28764	-3.28542
hsa-miR-4448	2.43e-05	0.00023796	1.15066	-3.08291	-3.10814	-3.01235	-3.03369	-3.07446	-3.09603	-3.22205	-3.13428	-3.27834	-3.32109	-3.32191	-3.27732	-3.28825	-3.31458	-3.28764	-3.28542
hsa-miR-4449	2.43e-05	0.00023796	1.15066	-3.08291	-3.10814	-3.01235	-3.03369	-3.07446	-3.09603	-3.22205	-3.13428	-3.27834	-3.32109	-3.32191	-3.27732	-3.28825	-3.31458	-3.28764	-3.28542
hsa-miR-4450	2.43e-05	0.00023796	1.15066	-3.08291	-3.10814	-3.01235	-3.03369	-3.07446	-3.09603	-3.22205	-3.13428	-3.27834	-3.32109	-3.32191	-3.27732	-3.28825	-3.31458	-3.28764	-3.28542
hsa-miR-4451	2.43e-05	0.00023796	1.15066	-3.08291	-3.10814	-3.01235	-3.03369	-3.07446	-3.09603	-3.22205	-3.13428	-3.27834	-3.32109	-3.32191	-3.27732	-3.28825	-3.31458	-3.28764	-3.28542
hsa-miR-4452	2.43e-05	0.00023796	1.15066	-3.08291	-3.10814	-3.01235	-3.03369	-3.07446	-3.09603	-3.22205	-3.13428	-3.27834	-3.32109	-3.32191	-3.27732	-3.28825	-3.31458	-3.28764	-3.28542
hsa-miR-4453	2.43e-05	0.00023796	1.15066	-3.08291	-3.10814	-3.01235	-3.03369	-3.07446	-3.09603	-3.22205	-3.13428	-3.27834	-3.32109	-3.32191	-3.27732	-3.28825	-3.31458	-3.28764	-3.28542
hsa-miR-4454	0.0328299	0.04167	0.463601	-3.08291	-3.10814	-3.01235	-3.03369	5.30778	-3.09603	5.02553	1.11159	5.10015	5.02553	4.82129	5.53619	0.613855	-0.231738	3.87116	1.62399
hsa-miR-4455	0.561568	0.585783	0.874376	-3.08291	-3.10814	-3.01235	-3.03369	-3.07446	2.11132	-3.22205	-3.13428	-3.27834	0.631801	-0.801346	-3.27732	-3.28825	1.69706	-3.28764	-3.28542
hsa-miR-4456	2.43e-05	0.00023796	1.15066	-3.08291	-3.10814	-3.01235	-3.03369	-3.07446	-3.09603	-3.22205	-3.13428	-3.27834	-3.32109	-3.32191	-3.27732	-3.28825	-3.31458	-3.28764	-3.28542
hsa-miR-4457	2.43e-05	0.00023796	1.15066	-3.08291	-3.10814	-3.01235	-3.03369	-3.07446	-3.09603	-3.22205	-3.13428	-3.27834	-3.32109	-3.32191	-3.27732	-3.28825	-3.31458	-3.28764	-3.28542
hsa-miR-4458	2.43e-05	0.00023796	1.15066	-3.08291	-3.10814	-3.01235	-3.03369	-3.07446	-3.09603	-3.22205	-3.13428	-3.27834	-3.32109	-3.32191	-3.27732	-3.28825	-3.31458	-3.28764	-3.28542
hsa-miR-4459	0.368829	0.388085	1.37784	7.75402	4.2657	-3.01235	-3.03369	3.30968	4.16951	5.53619	5.80537	4.82129	4.66501	4.16951	1.36687	4.82129	6.603	4.2657	5.53619
hsa-miR-4460	2.43e-05	0.00023796	1.15066	-3.08291	-3.10814	-3.01235	-3.03369	-3.07446	-3.09603	-3.22205	-3.13428	-3.27834	-3.32109	-3.32191	-3.27732	-3.28825	-3.31458	-3.28764	-3.28542
hsa-miR-4461	2.43e-05	0.00023796	1.15066	-3.08291	-3.10814	-3.01235	-3.03369	-3.07446	-3.09603	-3.22205	-3.13428	-3.27834	-3.32109	-3.32191	-3.27732	-3.28825	-3.31458	-3.28764	-3.28542
hsa-miR-4462	2.43e-05	0.00023796	1.15066	-3.08291	-3.10814	-3.01235	-3.03369	-3.07446	-3.09603	-3.22205	-3.13428	-3.27834	-3.32109	-3.32191	-3.27732	-3.28825	-3.31458	-3.28764	-3.28542
hsa-miR-4463	0.0767179	0.0833424	0.462799	-3.08291	-3.10814	-3.01235	-3.03369	-3.07446	-3.09603	0.333962	-3.13428	-3.27834	-2.36566	-1.67955	-3.27732	-0.135097	-0.183868	0.0522754	-0.0352333
hsa-miR-4464	2.43e-05	0.00023796	1.15066	-3.08291	-3.10814	-3.01235	-3.03369	-3.07446	-3.09603	-3.22205	-3.13428	-3.27834	-3.32109	-3.32191	-3.27732	-3.28825	-3.31458	-3.28764	-3.28542
hsa-miR-4465	0.443846	0.599655	0.507903	-3.08291	-3.10814	-3.01235	-3.03369	-3.07446	-3.09603	-3.22205	-3.13428	-3.27834	-3.32109	0.0522754	-3.27732	-3.28825	-2.36678	-3.28764	-3.28542
hsa-miR-4466	0.0334489	0.0385683	0.505453	-3.08291	2.07663	-3.01235	-3.03369	-3.07446	3.14937	2.86355	3.20967	2.86355	2.94923	3.02036	2.22739	2.0349	3.14937	3.30968	3.14937
hsa-miR-4467	2.43e-05	0.00023796	1.15066	-3.08291	-3.10814	-3.01235	-3.03369	-3.07446	-3.09603	-3.22205	-3.13428	-3.27834	-3.32109	-3.32191	-3.27732	-3.28825	-3.31458	-3.28764	-3.28542
hsa-miR-4468	2.43e-05	0.00023796	1.15066	-3.08291	-3.10814	-3.01235	-3.03369	-3.07446	-3.09603	-3.22205	-3.13428	-3.27834	-3.32109	-3.32191	-3.27732	-3.28825	-3.31458	-3.28764	-3.28542
hsa-miR-4469	2.43e-05	0.00023796	1.15066	-3.08291	-3.10814	-3.01235	-3.03369	-3.07446	-3.09603	-3.22205	-3.13428	-3.27834	-3.32109	-3.32191	-3.27732	-3.28825	-3.31458	-3.28764	-3.28542
hsa-miR-4470	2.43e-05	0.00023796	1.15066	-3.08291	-3.10814	-3.01235	-3.03369	-3.07446	-3.09603	-3.22205	-3.13428	-3.27834	-3.32109	-3.32191	-3.27732	-3.28825	-3.31458	-3.28764	-3.28542
hsa-miR-4471	2.43e-05	0.00023796	1.15066	-3.08291	-3.10814	-3.01235	-3.03369	-3.07446	-3.09603	-3.22205	-3.13428	-3.27834	-3.32109	-3.32191	-3.27732	-3.28825	-3.31458	-3.28764	-3.28542
hsa-miR-4472	2.43e-05	0.00023796	1.15066	-3.08291	-3.10814	-3.01235	-3.03369	-3.07446	-3.09603	-3.22205	-3.13428	-3.27834	-3.32109	-3.32191	-3.27732	-3.28825	-3.31458	-3.28764	-3.28542
hsa-miR-4473	2.43e-05	0.00023796	1.15066	-3.08291	-3.10814	-3.01235	-3.03369	-3.07446	-3.09603	-3.22205	-3.13428	-3.27834	-3.32109	-3.32191	-3.27732	-3.28825	-3.31458	-3.28764	-3.28542
hsa-miR-4474-3p	2.43e-05	0.00023796	1.15066	-3.08291	-3.10814	-3.01235	-3.03369	-3.07446	-3.09603	-3.22205	-3.13428	-3.27834	-3.32109	-3.32191	-3.27732	-3.28825	-3.31458	-3.28764	-3.28542
hsa-miR-4474-5p	2.43e-05	0.00023796	1.15066	-3.08291	-3.10814	-3.01235	-3.03369	-3.07446	-3.09603	-3.22205	-3.13428	-3.27834	-3.32109	-3.32191	-3.27732	-3.28825	-3.31458	-3.28764	-3.28542
hsa-miR-4475	2.43e-05	0.00023796	1.15066	-3.08291	-3.10814	-3.01235	-3.03369	-3.07446	-3.09603	-3.22205	-3.13428	-3.27834	-3.32109	-3.32191	-3.27732	-3.28825	-3.31458	-3.28764	-3.28542
hsa-miR-4476	0.0605374	0.0816538	0.290941	-3.08291	-3.10814	-3.01235	-3.03369	-3.07446	-3.09603	-3.22205	-3.13428	-3.27834	-3.32109	-3.32191	-3.27732	-0.855729	-0.636215	-0.500397	-0.135097
hsa-miR-4477a	2.43e-05	0.00023796	1.15066	-3.08291	-3.10814	-3.01235	-3.03369	-3.07446	-3.09603	-3.22205	-3.13428	-3.27834	-3.32109	-3.32191	-3.27732	-3.28825	-3.31458	-3.28764	-3.28542
hsa-miR-4477b	2.43e-05	0.00023796	1.15066	-3.08291	-3.10814	-3.01235	-3.03369	-3.07446	-3.09603	-3.22205	-3.13428	-3.27834	-3.32109	-3.32191	-3.27732	-3.28825	-3.31458	-3.28764	-3.28542
hsa-miR-4478	0.508497	0.599655	1.03138	-3.08291	-3.10814	-3.01235	-3.03369	-3.07446	-3.09603	-3.22205	-3.13428	-3.27834	-3.32109	-3.01848	-3.27732	-3.28825	-2.54577	-3.28764	-3.28542
hsa-miR-4479	2.43e-05	0.00023796	1.15066	-3.08291	-3.10814	-3.01235	-3.03369	-3.07446	-3.09603	-3.22205	-3.13428	-3.27834	-3.32109	-3.32191	-3.27732	-3.28825	-3.31458	-3.28764	-3.28542
hsa-miR-448	2.43e-05	0.00023796	1.15066	-3.08291	-3.10814	-3.01235	-3.03369	-3.07446	-3.09603	-3.22205	-3.13428	-3.27834	-3.32109	-3.32191	-3.27732	-3.28825	-3.31458	-3.28764	-3.28542
hsa-miR-4480	2.43e-05	0.00023796	1.15066	-3.08291	-3.10814	-3.01235	-3.03369	-3.07446	-3.09603	-3.22205	-3.13428	-3.27834	-3.32109	-3.32191	-3.27732	-3.28825	-3.31458	-3.28764	-3.28542
hsa-miR-4481	0.404144	0.484895	1.04619	-3.08291	-3.10814	-3.01235	-3.03369	-3.07446	-3.09603	-3.22205	-3.13428	-3.27834	-3.32109	-3.32191	-3.27732	-3.28825	-2.45954	-3.28764	-3.28542
hsa-miR-4482-3p	2.43e-05	0.00023796	1.15066	-3.08291	-3.10814	-3.01235	-3.03369	-3.07446	-3.09603	-3.22205	-3.13428	-3.27834	-3.32109	-3.32191	-3.27732	-3.28825	-3.31458	-3.28764	-3.28542
hsa-miR-4482-5p	2.43e-05	0.00023796	1.15066	-3.08291	-3.10814	-3.01235	-3.03369	-3.07446	-3.09603	-3.22205	-3.13428	-3.27834	-3.32109	-3.32191	-3.27732	-3.28825	-3.31458	-3.28764	-3.28542
hsa-miR-4483	2.43e-05	0.00023796	1.15066	-3.08291	-3.10814	-3.01235	-3.03369	-3.07446	-3.09603	-3.22205	-3.13428	-3.27834	-3.32109	-3.32191	-3.27732	-3.28825	-3.31458	-3.28764	-3.28542
hsa-miR-4484	0.0033581	0.00141517	0.29626	-3.08291	-3.10814	-3.01235	-3.03369	-3.07446	-3.09603	-3.22205	-3.13428	-0.913735	-2.36678	-2.49808	-3.27732	-0.636215	-0.771228	-1.12546	-1.09095
hsa-miR-4485	2.43e-05	0.00023796	1.15066	-3.08291	-3.10814	-3.01235	-3.03369	-3.07446	-3.09603	-3.22205	-3.13428	-3.27834	-3.32109	-3.32191	-3.27732	-3.28825	-3.31458	-3.28764	-3.28542
hsa-miR-4486	0.440125	0.509215	0.823662	-3.08291	-3.10814	-3.01235	-3.03369	-3.07446	-3.09603	-0.231738	-3.13428	-3.27834	-3.32109	-2.89838	-3.27732	-1.07057	-2.48492	-1.05899	-1.10157
hsa-miR-4487	2.43e-05	0.00023796	1.15066	-3.08291	-3.10814	-3.01235	-3.03369	-3.07446	-3.09603	-3.22205	-3.13428	-3.27834	-3.32109	-3.32191	-3.27732	-3.28825	-3.31458	-3.28764	-3.28542
hsa-miR-4488	2.43e-05	0.00023796	1.15066	-3.08291	-3.10814	-3.01235	-3.03369	-3.07446	-3.09603	-3.22205	-3.13428	-3.27834	-3.32109	-3.32191	-3.27732	-3.28825	-3.31458	-3.28764	-3.28542
hsa-miR-4489	2.43e-05	0.00023796	1.15066	-3.08291	-3.10814	-3.01235	-3.03369	-3.07446	-3.09603	-3.22205	-3.13428	-3.27834	-3.32109	-3.32191	-3.27732	-3.28825	-3.31458	-3.28764	-3.28542
hsa-miR-4490	2.43e-05	0.00023796	1.15066	-3.08291	-3.10814	-3.01235	-3.03369	-3.07446	-3.09603	-3.22205	-3.13428	-3.27834	-3.32109	-3.32191	-3.27732	-3.28825	-3.31458	-3.28764	-3.28542
hsa-miR-4491	2.43e-05	0.00023796	1.15066	-3.08291	-3.10814	-3.01235	-3.03369	-3.07446	-3.09603	-3.22205	-3.13428	-3.27834	-3.32109	-3.32191	-3.27732	-3.28825	-3.31458	-3.28764	-3.28542
hsa-miR-4492	2.43e-05	0.00023796	1.15066	-3.08291	-3.10814	-3.01235	-3.03369	-3.07446	-3.09603	-3.22205	-3.13428	-3.27834	-3.32109	-3.32191	-3.27732	-3.28825	-3.31458	-3.28764	-3.28542
hsa-miR-4493	2.43e-05	0.00023796	1.15066	-3.08291	-3.10814	-3.01235	-3.03369	-3.07446	-3.09603	-3.22205	-3.13428	-3.27834	-3.32109	-3.32191	-3.27732	-3.28825	-3.31458	-3.28764	-3.28542
hsa-miR-4494	2.43e-05	0.00023796	1.15066	-3.08291	-3.10814	-3.01235	-3.03369	-3.07446	-3.09603	-3.22205	-3.13428	-3.27834	-3.32109	-3.32191	-3.27732	-3.28825	-3.31458	-3.28764	-3.28542
hsa-miR-4495	2.43e-05	0.00023796	1.15066	-3.08291	-3.10814	-3.01235	-3.03369	-3.07446	-3.09603	-3.22205	-3.13428	-3.27834	-3.32109	-3.32191	-3.27732	-3.28825	-3.31458	-3.28764	-3.28542
hsa-miR-4496	2.43e-05	0.00023796	1.15066	-3.08291	-3.10814	-3.01235	-3.03369	-3.07446	-3.09603	-3.22205	-3.13428	-3.27834	-3.32109	-3.32191	-3.27732	-3.28825	-3.31458	-3.28764	-3.28542
hsa-miR-4497	0.65928	0.663496	1.54659	-3.08291	-3.10814	-3.01235	-3.03369	-3.07446	-3.09603	-3.22205	1.62399	-3.27834	-2.48832	-2.89753	-3.27732	-3.28825	-0.215514	-0.820963	-1.06881
hsa-miR-4498	2.43e-05	0.00023796	1.15066	-3.08291	-3.10814	-3.01235	-3.03369	-3.07446	-3.09603	-3.22205	-3.13428	-3.27834	-3.32109	-3.32191	-3.27732	-3.28825	-3.31458	-3.28764	-3.28542
hsa-miR-4499	0.00433238	0.00740819	0.128388	-3.08291	-3.10814	-3.01235	-3.03369	-3.07446	-3.09603	-3.22205	-3.13428	-3.27834	-0.739123	0.456188	-3.27732	0.456188	0.276023	0.300676	0.383673
hsa-miR-449a	2.43e-05	0.00023796	1.15066	-3.08291	-3.10814	-3.01235	-3.03369	-3.07446	-3.09603	-3.22205	-3.13428	-3.27834	-3.32109	-3.32191	-3.27732	-3.28825	-3.31458	-3.28764	-3.28542
hsa-miR-449b-3p	2.43e-05	0.00023796	1.15066	-3.08291	-3.10814	-3.01235	-3.03369	-3.07446	-3.09603	-3.22205	-3.13428	-3.27834	-3.32109	-3.32191	-3.27732	-3.28825	-3.31458	-3.28764	-3.28542
hsa-miR-449b-5p	2.43e-05	0.00023796	1.15066	-3.08291	-3.10814	-3.01235	-3.03369	-3.07446	-3.09603	-3.22205	-3.13428	-3.27834	-3.32109	-3.32191	-3.27732	-3.28825	-3.31458	-3.28764	-3.28542
hsa-miR-449c-3p	2.43e-05	0.00023796	1.15066	-3.08291	-3.10814	-3.01235	-3.03369	-3.07446	-3.09603	-3.22205	-3.13428	-3.27834	-3.32109	-3.32191	-3.27732	-3.28825	-3.31458	-3.28764	-3.28542
hsa-miR-449c-5p	2.43e-05	0.00023796	1.15066	-3.08291	-3.10814	-3.01235	-3.03369	-3.07446	-3.09603	-3.22205	-3.13428	-3.27834	-3.32109	-3.32191	-3.27732	-3.28825	-3.31458	-3.28764	-3.28542
hsa-miR-4500	2.43e-05	0.00023796	1.15066	-3.08291	-3.10814	-3.01235	-3.03369	-3.07446	-3.09603	-3.22205	-3.13428	-3.27834	-3.32109	-3.32191	-3.27732	-3.28825	-3.31458	-3.28764	-3.28542
hsa-miR-4501	2.43e-05	0.00023796	1.15066	-3.08291	-3.10814	-3.01235	-3.03369	-3.07446	-3.09603	-3.22205	-3.13428	-3.27834	-3.32109	-3.32191	-3.27732	-3.28825	-3.31458	-3.28764	-3.28542
hsa-miR-4502	2.43e-05	0.00023796	1.15066	-3.08291	-3.10814	-3.01235	-3.03369	-3.07446	-3.09603	-3.22205	-3.13428	-3.27834	-3.32109	-3.32191	-3.27732	-3.28825	-3.31458	-3.28764	-3.28542
hsa-miR-4503	2.43e-05	0.00023796	1.15066	-3.08291	-3.10814	-3.01235	-3.03369	-3.07446	-3.09603	-3.22205	-3.13428	-3.27834	-3.32109	-3.32191	-3.27732	-3.28825	-3.31458	-3.28764	-3.28542
hsa-miR-4504	2.43e-05	0.00023796	1.15066	-3.08291	-3.10814	-3.01235	-3.03369	-3.07446	-3.09603	-3.22205	-3.13428	-3.27834	-3.32109	-3.32191	-3.27732	-3.28825	-3.31458	-3.28764	-3.28542
hsa-miR-4505	0.0751424	0.0693053	1.02909	3.56217	-3.10814	-3.01235	-3.03369	-3.07446	-3.09603	1.0139	1.28188	1.69706	0.999929	0.479904	0.241488	0.592514	2.22739	0.276023	0.217976
hsa-miR-4506	2.43e-05	0.00023796	1.15066	-3.08291	-3.10814	-3.01235	-3.03369	-3.07446	-3.09603	-3.22205	-3.13428	-3.27834	-3.32109	-3.32191	-3.27732	-3.28825	-3.31458	-3.28764	-3.28542
hsa-miR-4507	1.87e-05	0.000474793	0.160518	-3.08291	-3.10814	-3.01235	-3.03369	-3.07446	-3.09603	-0.106771	-3.13428	1.28188	0.241488	-0.0352333	0.0300821	0.241488	1.32389	-0.0733799	-0.500397
hsa-miR-4508	2.43e-05	0.00023796	1.15066	-3.08291	-3.10814	-3.01235	-3.03369	-3.07446	-3.09603	-3.22205	-3.13428	-3.27834	-3.32109	-3.32191	-3.27732	-3.28825	-3.31458	-3.28764	-3.28542
hsa-miR-4509	2.43e-05	0.00023796	1.15066	-3.08291	-3.10814	-3.01235	-3.03369	-3.07446	-3.09603	-3.22205	-3.13428	-3.27834	-3.32109	-3.32191	-3.27732	-3.28825	-3.31458	-3.28764	-3.28542
hsa-miR-450a-3p	2.43e-05	0.00023796	1.15066	-3.08291	-3.10814	-3.01235	-3.03369	-3.07446	-3.09603	-3.22205	-3.13428	-3.27834	-3.32109	-3.32191	-3.27732	-3.28825	-3.31458	-3.28764	-3.28542
hsa-miR-450a-5p	2.43e-05	0.00023796	1.15066	-3.08291	-3.10814	-3.01235	-3.03369	-3.07446	-3.09603	-3.22205	-3.13428	-3.27834	-3.32109	-3.32191	-3.27732	-3.28825	-3.31458	-3.28764	-3.28542
hsa-miR-450b-3p	2.43e-05	0.00023796	1.15066	-3.08291	-3.10814	-3.01235	-3.03369	-3.07446	-3.09603	-3.22205	-3.13428	-3.27834	-3.32109	-3.32191	-3.27732	-3.28825	-3.31458	-3.28764	-3.28542
hsa-miR-450b-5p	2.43e-05	0.00023796	1.15066	-3.08291	-3.10814	-3.01235	-3.03369	-3.07446	-3.09603	-3.22205	-3.13428	-3.27834	-3.32109	-3.32191	-3.27732	-3.28825	-3.31458	-3.28764	-3.28542
hsa-miR-4510	2.43e-05	0.00023796	1.15066	-3.08291	-3.10814	-3.01235	-3.03369	-3.07446	-3.09603	-3.22205	-3.13428	-3.27834	-3.32109	-3.32191	-3.27732	-3.28825	-3.31458	-3.28764	-3.28542
hsa-miR-4511	2.43e-05	0.00023796	1.15066	-3.08291	-3.10814	-3.01235	-3.03369	-3.07446	-3.09603	-3.22205	-3.13428	-3.27834	-3.32109	-3.32191	-3.27732	-3.28825	-3.31458	-3.28764	-3.28542
hsa-miR-4512	2.43e-05	0.00023796	1.15066	-3.08291	-3.10814	-3.01235	-3.03369	-3.07446	-3.09603	-3.22205	-3.13428	-3.27834	-3.32109	-3.32191	-3.27732	-3.28825	-3.31458	-3.28764	-3.28542
hsa-miR-4513	2.43e-05	0.00023796	1.15066	-3.08291	-3.10814	-3.01235	-3.03369	-3.07446	-3.09603	-3.22205	-3.13428	-3.27834	-3.32109	-3.32191	-3.27732	-3.28825	-3.31458	-3.28764	-3.28542
hsa-miR-4514	0.499884	0.644924	1.03298	-3.08291	-3.10814	-3.01235	-3.03369	-3.07446	-3.09603	-3.22205	-3.13428	-3.27834	-3.32109	-2.37521	-3.27732	-3.28825	-3.31458	-3.28764	-3.28542
hsa-miR-4515	0.461741	0.557199	0.816174	-3.08291	-3.10814	-3.01235	-3.03369	-3.07446	-3.09603	-3.22205	-3.13428	-3.27834	-2.8762	-2.47759	-3.27732	-1.64242	-3.31458	-3.28764	-3.28542
hsa-miR-4516	0.429227	0.62133	0.782738	7.29293	7.75402	-3.01235	6.603	6.0381	6.25201	7.29293	6.25201	5.80537	5.80537	6.0381	5.69761	7.75402	5.80537	7.75402	8.50142
hsa-miR-4517	2.43e-05	0.00023796	1.15066	-3.08291	-3.10814	-3.01235	-3.03369	-3.07446	-3.09603	-3.22205	-3.13428	-3.27834	-3.32109	-3.32191	-3.27732	-3.28825	-3.31458	-3.28764	-3.28542
hsa-miR-4518	2.43e-05	0.00023796	1.15066	-3.08291	-3.10814	-3.01235	-3.03369	-3.07446	-3.09603	-3.22205	-3.13428	-3.27834	-3.32109	-3.32191	-3.27732	-3.28825	-3.31458	-3.28764	-3.28542
hsa-miR-4519	2.43e-05	0.00023796	1.15066	-3.08291	-3.10814	-3.01235	-3.03369	-3.07446	-3.09603	-3.22205	-3.13428	-3.27834	-3.32109	-3.32191	-3.27732	-3.28825	-3.31458	-3.28764	-3.28542
hsa-miR-451a	0.124076	0.217851	0.183187	-3.08291	-3.10814	-3.01235	-3.03369	-3.07446	-3.09603	-3.22205	-3.13428	0.0300821	1.1931	0.373177	-3.27732	-3.28825	-3.31458	-3.28764	-3.28542
hsa-miR-451b	2.43e-05	0.00023796	1.15066	-3.08291	-3.10814	-3.01235	-3.03369	-3.07446	-3.09603	-3.22205	-3.13428	-3.27834	-3.32109	-3.32191	-3.27732	-3.28825	-3.31458	-3.28764	-3.28542
hsa-miR-452-3p	2.43e-05	0.00023796	1.15066	-3.08291	-3.10814	-3.01235	-3.03369	-3.07446	-3.09603	-3.22205	-3.13428	-3.27834	-3.32109	-3.32191	-3.27732	-3.28825	-3.31458	-3.28764	-3.28542
hsa-miR-452-5p	2.43e-05	0.00023796	1.15066	-3.08291	-3.10814	-3.01235	-3.03369	-3.07446	-3.09603	-3.22205	-3.13428	-3.27834	-3.32109	-3.32191	-3.27732	-3.28825	-3.31458	-3.28764	-3.28542
hsa-miR-4520a-3p	2.43e-05	0.00023796	1.15066	-3.08291	-3.10814	-3.01235	-3.03369	-3.07446	-3.09603	-3.22205	-3.13428	-3.27834	-3.32109	-3.32191	-3.27732	-3.28825	-3.31458	-3.28764	-3.28542
hsa-miR-4520a-5p	2.43e-05	0.00023796	1.15066	-3.08291	-3.10814	-3.01235	-3.03369	-3.07446	-3.09603	-3.22205	-3.13428	-3.27834	-3.32109	-3.32191	-3.27732	-3.28825	-3.31458	-3.28764	-3.28542
hsa-miR-4520b-3p	2.43e-05	0.00023796	1.15066	-3.08291	-3.10814	-3.01235	-3.03369	-3.07446	-3.09603	-3.22205	-3.13428	-3.27834	-3.32109	-3.32191	-3.27732	-3.28825	-3.31458	-3.28764	-3.28542
hsa-miR-4521	2.43e-05	0.00023796	1.15066	-3.08291	-3.10814	-3.01235	-3.03369	-3.07446	-3.09603	-3.22205	-3.13428	-3.27834	-3.32109	-3.32191	-3.27732	-3.28825	-3.31458	-3.28764	-3.28542
hsa-miR-4522	2.43e-05	0.00023796	1.15066	-3.08291	-3.10814	-3.01235	-3.03369	-3.07446	-3.09603	-3.22205	-3.13428	-3.27834	-3.32109	-3.32191	-3.27732	-3.28825	-3.31458	-3.28764	-3.28542
hsa-miR-4523	2.43e-05	0.00023796	1.15066	-3.08291	-3.10814	-3.01235	-3.03369	-3.07446	-3.09603	-3.22205	-3.13428	-3.27834	-3.32109	-3.32191	-3.27732	-3.28825	-3.31458	-3.28764	-3.28542
hsa-miR-4524a-3p	2.43e-05	0.00023796	1.15066	-3.08291	-3.10814	-3.01235	-3.03369	-3.07446	-3.09603	-3.22205	-3.13428	-3.27834	-3.32109	-3.32191	-3.27732	-3.28825	-3.31458	-3.28764	-3.28542
hsa-miR-4524a-5p	2.43e-05	0.00023796	1.15066	-3.08291	-3.10814	-3.01235	-3.03369	-3.07446	-3.09603	-3.22205	-3.13428	-3.27834	-3.32109	-3.32191	-3.27732	-3.28825	-3.31458	-3.28764	-3.28542
hsa-miR-4524b-3p	2.43e-05	0.00023796	1.15066	-3.08291	-3.10814	-3.01235	-3.03369	-3.07446	-3.09603	-3.22205	-3.13428	-3.27834	-3.32109	-3.32191	-3.27732	-3.28825	-3.31458	-3.28764	-3.28542
hsa-miR-4524b-5p	2.43e-05	0.00023796	1.15066	-3.08291	-3.10814	-3.01235	-3.03369	-3.07446	-3.09603	-3.22205	-3.13428	-3.27834	-3.32109	-3.32191	-3.27732	-3.28825	-3.31458	-3.28764	-3.28542
hsa-miR-4525	2.43e-05	0.00023796	1.15066	-3.08291	-3.10814	-3.01235	-3.03369	-3.07446	-3.09603	-3.22205	-3.13428	-3.27834	-3.32109	-3.32191	-3.27732	-3.28825	-3.31458	-3.28764	-3.28542
hsa-miR-4526	2.43e-05	0.00023796	1.15066	-3.08291	-3.10814	-3.01235	-3.03369	-3.07446	-3.09603	-3.22205	-3.13428	-3.27834	-3.32109	-3.32191	-3.27732	-3.28825	-3.31458	-3.28764	-3.28542
hsa-miR-4527	2.43e-05	0.00023796	1.15066	-3.08291	-3.10814	-3.01235	-3.03369	-3.07446	-3.09603	-3.22205	-3.13428	-3.27834	-3.32109	-3.32191	-3.27732	-3.28825	-3.31458	-3.28764	-3.28542
hsa-miR-4528	2.43e-05	0.00023796	1.15066	-3.08291	-3.10814	-3.01235	-3.03369	-3.07446	-3.09603	-3.22205	-3.13428	-3.27834	-3.32109	-3.32191	-3.27732	-3.28825	-3.31458	-3.28764	-3.28542
hsa-miR-4529-3p	2.43e-05	0.00023796	1.15066	-3.08291	-3.10814	-3.01235	-3.03369	-3.07446	-3.09603	-3.22205	-3.13428	-3.27834	-3.32109	-3.32191	-3.27732	-3.28825	-3.31458	-3.28764	-3.28542
hsa-miR-4529-5p	2.43e-05	0.00023796	1.15066	-3.08291	-3.10814	-3.01235	-3.03369	-3.07446	-3.09603	-3.22205	-3.13428	-3.27834	-3.32109	-3.32191	-3.27732	-3.28825	-3.31458	-3.28764	-3.28542
hsa-miR-4530	0.00233114	0.00310508	0.0876773	-3.08291	-3.10814	-3.01235	-3.03369	-3.07446	-3.09603	1.26137	3.14937	0.631801	2.47753	2.07663	-0.155896	6.25201	5.30778	2.11132	2.11132
hsa-miR-4531	2.43e-05	0.00023796	1.15066	-3.08291	-3.10814	-3.01235	-3.03369	-3.07446	-3.09603	-3.22205	-3.13428	-3.27834	-3.32109	-3.32191	-3.27732	-3.28825	-3.31458	-3.28764	-3.28542
hsa-miR-4532	0.00483675	0.00146981	0.256301	-3.08291	-3.10814	-3.01235	-3.03369	-3.07446	-3.09603	-3.22205	-3.13428	-3.27834	-2.45954	-2.50534	-1.09583	-0.913735	-0.70035	-0.839665	0.0300821
hsa-miR-4533	2.43e-05	0.00023796	1.15066	-3.08291	-3.10814	-3.01235	-3.03369	-3.07446	-3.09603	-3.22205	-3.13428	-3.27834	-3.32109	-3.32191	-3.27732	-3.28825	-3.31458	-3.28764	-3.28542
hsa-miR-4534	0.00517172	0.00630157	0.0495653	-3.08291	-3.10814	-3.01235	-3.03369	-3.07446	-3.09603	0.383673	-3.13428	-3.27834	-0.0168114	0.204696	-0.0168114	5.10015	0.53678	0.747469	1.26137
hsa-miR-4535	2.43e-05	0.00023796	1.15066	-3.08291	-3.10814	-3.01235	-3.03369	-3.07446	-3.09603	-3.22205	-3.13428	-3.27834	-3.32109	-3.32191	-3.27732	-3.28825	-3.31458	-3.28764	-3.28542
hsa-miR-4536-3p	2.43e-05	0.00023796	1.15066	-3.08291	-3.10814	-3.01235	-3.03369	-3.07446	-3.09603	-3.22205	-3.13428	-3.27834	-3.32109	-3.32191	-3.27732	-3.28825	-3.31458	-3.28764	-3.28542
hsa-miR-4536-5p	2.43e-05	0.00023796	1.15066	-3.08291	-3.10814	-3.01235	-3.03369	-3.07446	-3.09603	-3.22205	-3.13428	-3.27834	-3.32109	-3.32191	-3.27732	-3.28825	-3.31458	-3.28764	-3.28542
hsa-miR-4537	2.43e-05	0.00023796	1.15066	-3.08291	-3.10814	-3.01235	-3.03369	-3.07446	-3.09603	-3.22205	-3.13428	-3.27834	-3.32109	-3.32191	-3.27732	-3.28825	-3.31458	-3.28764	-3.28542
hsa-miR-4538	0.392688	0.457437	1.04759	-3.08291	-3.10814	-3.01235	-3.03369	-3.07446	-3.09603	-3.22205	-3.13428	-3.27834	-3.32109	-2.47311	-3.27732	-3.28825	-3.31458	-3.28764	-3.28542
hsa-miR-4539	0.466635	0.58173	1.03766	-3.08291	-3.10814	-3.01235	-3.03369	-3.07446	-3.09603	-3.22205	-3.13428	-3.27834	-3.32109	-2.40615	-3.27732	-3.28825	-3.31458	-3.28764	-3.28542
hsa-miR-454-3p	2.43e-05	0.00023796	1.15066	-3.08291	-3.10814	-3.01235	-3.03369	-3.07446	-3.09603	-3.22205	-3.13428	-3.27834	-3.32109	-3.32191	-3.27732	-3.28825	-3.31458	-3.28764	-3.28542
hsa-miR-454-5p	2.43e-05	0.00023796	1.15066	-3.08291	-3.10814	-3.01235	-3.03369	-3.07446	-3.09603	-3.22205	-3.13428	-3.27834	-3.32109	-3.32191	-3.27732	-3.28825	-3.31458	-3.28764	-3.28542
hsa-miR-4540	2.43e-05	0.00023796	1.15066	-3.08291	-3.10814	-3.01235	-3.03369	-3.07446	-3.09603	-3.22205	-3.13428	-3.27834	-3.32109	-3.32191	-3.27732	-3.28825	-3.31458	-3.28764	-3.28542
hsa-miR-455-3p	2.43e-05	0.00023796	1.15066	-3.08291	-3.10814	-3.01235	-3.03369	-3.07446	-3.09603	-3.22205	-3.13428	-3.27834	-3.32109	-3.32191	-3.27732	-3.28825	-3.31458	-3.28764	-3.28542
hsa-miR-455-5p	2.43e-05	0.00023796	1.15066	-3.08291	-3.10814	-3.01235	-3.03369	-3.07446	-3.09603	-3.22205	-3.13428	-3.27834	-3.32109	-3.32191	-3.27732	-3.28825	-3.31458	-3.28764	-3.28542
hsa-miR-4632-3p	2.43e-05	0.00023796	1.15066	-3.08291	-3.10814	-3.01235	-3.03369	-3.07446	-3.09603	-3.22205	-3.13428	-3.27834	-3.32109	-3.32191	-3.27732	-3.28825	-3.31458	-3.28764	-3.28542
hsa-miR-4632-5p	0.000415006	0.00141517	0.134874	-3.08291	-3.10814	-3.01235	-3.03369	-3.07446	-3.09603	-3.22205	-3.13428	-0.559837	-0.582683	-0.0733799	-3.27732	0.289442	-0.0552746	0.358231	0.110216
hsa-miR-4633-3p	2.43e-05	0.00023796	1.15066	-3.08291	-3.10814	-3.01235	-3.03369	-3.07446	-3.09603	-3.22205	-3.13428	-3.27834	-3.32109	-3.32191	-3.27732	-3.28825	-3.31458	-3.28764	-3.28542
hsa-miR-4633-5p	2.43e-05	0.00023796	1.15066	-3.08291	-3.10814	-3.01235	-3.03369	-3.07446	-3.09603	-3.22205	-3.13428	-3.27834	-3.32109	-3.32191	-3.27732	-3.28825	-3.31458	-3.28764	-3.28542
hsa-miR-4634	0.00406681	0.00786213	0.251772	-3.08291	-3.10814	-3.01235	-3.03369	-3.07446	-3.09603	0.690492	-3.13428	-3.27834	-0.839665	-0.599926	-0.215514	0.419577	0.402063	1.28188	1.28188
hsa-miR-4635	2.43e-05	0.00023796	1.15066	-3.08291	-3.10814	-3.01235	-3.03369	-3.07446	-3.09603	-3.22205	-3.13428	-3.27834	-3.32109	-3.32191	-3.27732	-3.28825	-3.31458	-3.28764	-3.28542
hsa-miR-4636	2.43e-05	0.00023796	1.15066	-3.08291	-3.10814	-3.01235	-3.03369	-3.07446	-3.09603	-3.22205	-3.13428	-3.27834	-3.32109	-3.32191	-3.27732	-3.28825	-3.31458	-3.28764	-3.28542
hsa-miR-4637	2.43e-05	0.00023796	1.15066	-3.08291	-3.10814	-3.01235	-3.03369	-3.07446	-3.09603	-3.22205	-3.13428	-3.27834	-3.32109	-3.32191	-3.27732	-3.28825	-3.31458	-3.28764	-3.28542
hsa-miR-4638-3p	2.43e-05	0.00023796	1.15066	-3.08291	-3.10814	-3.01235	-3.03369	-3.07446	-3.09603	-3.22205	-3.13428	-3.27834	-3.32109	-3.32191	-3.27732	-3.28825	-3.31458	-3.28764	-3.28542
hsa-miR-4638-5p	2.43e-05	0.00023796	1.15066	-3.08291	-3.10814	-3.01235	-3.03369	-3.07446	-3.09603	-3.22205	-3.13428	-3.27834	-3.32109	-3.32191	-3.27732	-3.28825	-3.31458	-3.28764	-3.28542
hsa-miR-4639-3p	2.43e-05	0.00023796	1.15066	-3.08291	-3.10814	-3.01235	-3.03369	-3.07446	-3.09603	-3.22205	-3.13428	-3.27834	-3.32109	-3.32191	-3.27732	-3.28825	-3.31458	-3.28764	-3.28542
hsa-miR-4639-5p	2.43e-05	0.00023796	1.15066	-3.08291	-3.10814	-3.01235	-3.03369	-3.07446	-3.09603	-3.22205	-3.13428	-3.27834	-3.32109	-3.32191	-3.27732	-3.28825	-3.31458	-3.28764	-3.28542
hsa-miR-4640-3p	2.43e-05	0.00023796	1.15066	-3.08291	-3.10814	-3.01235	-3.03369	-3.07446	-3.09603	-3.22205	-3.13428	-3.27834	-3.32109	-3.32191	-3.27732	-3.28825	-3.31458	-3.28764	-3.28542
hsa-miR-4640-5p	2.43e-05	0.00023796	1.15066	-3.08291	-3.10814	-3.01235	-3.03369	-3.07446	-3.09603	-3.22205	-3.13428	-3.27834	-3.32109	-3.32191	-3.27732	-3.28825	-3.31458	-3.28764	-3.28542
hsa-miR-4641	2.43e-05	0.00023796	1.15066	-3.08291	-3.10814	-3.01235	-3.03369	-3.07446	-3.09603	-3.22205	-3.13428	-3.27834	-3.32109	-3.32191	-3.27732	-3.28825	-3.31458	-3.28764	-3.28542
hsa-miR-4642	2.43e-05	0.00023796	1.15066	-3.08291	-3.10814	-3.01235	-3.03369	-3.07446	-3.09603	-3.22205	-3.13428	-3.27834	-3.32109	-3.32191	-3.27732	-3.28825	-3.31458	-3.28764	-3.28542
hsa-miR-4643	2.43e-05	0.00023796	1.15066	-3.08291	-3.10814	-3.01235	-3.03369	-3.07446	-3.09603	-3.22205	-3.13428	-3.27834	-3.32109	-3.32191	-3.27732	-3.28825	-3.31458	-3.28764	-3.28542
hsa-miR-4644	0.323939	0.475661	0.500909	-3.08291	-3.10814	-3.01235	-3.03369	-3.07446	-3.09603	-3.22205	-3.13428	-3.27834	-3.32109	-3.32191	-3.27732	-0.599926	-0.739123	-3.28764	-3.28542
hsa-miR-4645-3p	2.43e-05	0.00023796	1.15066	-3.08291	-3.10814	-3.01235	-3.03369	-3.07446	-3.09603	-3.22205	-3.13428	-3.27834	-3.32109	-3.32191	-3.27732	-3.28825	-3.31458	-3.28764	-3.28542
hsa-miR-4645-5p	2.43e-05	0.00023796	1.15066	-3.08291	-3.10814	-3.01235	-3.03369	-3.07446	-3.09603	-3.22205	-3.13428	-3.27834	-3.32109	-3.32191	-3.27732	-3.28825	-3.31458	-3.28764	-3.28542
hsa-miR-4646-3p	2.43e-05	0.00023796	1.15066	-3.08291	-3.10814	-3.01235	-3.03369	-3.07446	-3.09603	-3.22205	-3.13428	-3.27834	-3.32109	-3.32191	-3.27732	-3.28825	-3.31458	-3.28764	-3.28542
hsa-miR-4646-5p	0.284414	0.468517	0.589393	-3.08291	-3.10814	-3.01235	-3.03369	-3.07446	-3.09603	-3.22205	-3.13428	-3.27834	-2.90307	-1.10157	-3.27732	-3.28825	-1.07057	-3.28764	-3.28542
hsa-miR-4647	2.43e-05	0.00023796	1.15066	-3.08291	-3.10814	-3.01235	-3.03369	-3.07446	-3.09603	-3.22205	-3.13428	-3.27834	-3.32109	-3.32191	-3.27732	-3.28825	-3.31458	-3.28764	-3.28542
hsa-miR-4648	0.283482	0.385349	0.591764	-3.08291	-3.10814	-3.01235	-3.03369	-3.07446	-3.09603	-3.22205	-3.13428	-3.27834	-2.90307	-2.89701	-3.27732	-0.559837	-2.14875	-3.28764	-3.28542
hsa-miR-4649-3p	0.0144812	0.00023796	179.762	4.2657	2.94923	5.69761	6.0381	-3.07446	-3.09603	0.512673	-3.13428	-3.27834	-3.32109	-3.32191	-3.27732	-3.28825	-3.31458	-3.28764	-3.28542
hsa-miR-4649-5p	2.43e-05	0.00023796	1.15066	-3.08291	-3.10814	-3.01235	-3.03369	-3.07446	-3.09603	-3.22205	-3.13428	-3.27834	-3.32109	-3.32191	-3.27732	-3.28825	-3.31458	-3.28764	-3.28542
hsa-miR-4650-3p	2.43e-05	0.00023796	1.15066	-3.08291	-3.10814	-3.01235	-3.03369	-3.07446	-3.09603	-3.22205	-3.13428	-3.27834	-3.32109	-3.32191	-3.27732	-3.28825	-3.31458	-3.28764	-3.28542
hsa-miR-4650-5p	2.43e-05	0.00023796	1.15066	-3.08291	-3.10814	-3.01235	-3.03369	-3.07446	-3.09603	-3.22205	-3.13428	-3.27834	-3.32109	-3.32191	-3.27732	-3.28825	-3.31458	-3.28764	-3.28542
hsa-miR-4651	0.190071	0.258226	0.566909	-3.08291	-3.10814	-3.01235	-3.03369	-3.07446	-3.09603	-3.22205	-3.13428	-3.27834	-2.87759	-2.61417	-3.27732	-3.28825	-1.05899	-3.28764	-1.11382
hsa-miR-4652-3p	2.43e-05	0.00023796	1.15066	-3.08291	-3.10814	-3.01235	-3.03369	-3.07446	-3.09603	-3.22205	-3.13428	-3.27834	-3.32109	-3.32191	-3.27732	-3.28825	-3.31458	-3.28764	-3.28542
hsa-miR-4652-5p	2.43e-05	0.00023796	1.15066	-3.08291	-3.10814	-3.01235	-3.03369	-3.07446	-3.09603	-3.22205	-3.13428	-3.27834	-3.32109	-3.32191	-3.27732	-3.28825	-3.31458	-3.28764	-3.28542
hsa-miR-4653-3p	2.43e-05	0.00023796	1.15066	-3.08291	-3.10814	-3.01235	-3.03369	-3.07446	-3.09603	-3.22205	-3.13428	-3.27834	-3.32109	-3.32191	-3.27732	-3.28825	-3.31458	-3.28764	-3.28542
hsa-miR-4653-5p	2.43e-05	0.00023796	1.15066	-3.08291	-3.10814	-3.01235	-3.03369	-3.07446	-3.09603	-3.22205	-3.13428	-3.27834	-3.32109	-3.32191	-3.27732	-3.28825	-3.31458	-3.28764	-3.28542
hsa-miR-4654	2.43e-05	0.00023796	1.15066	-3.08291	-3.10814	-3.01235	-3.03369	-3.07446	-3.09603	-3.22205	-3.13428	-3.27834	-3.32109	-3.32191	-3.27732	-3.28825	-3.31458	-3.28764	-3.28542
hsa-miR-4655-3p	2.43e-05	0.00023796	1.15066	-3.08291	-3.10814	-3.01235	-3.03369	-3.07446	-3.09603	-3.22205	-3.13428	-3.27834	-3.32109	-3.32191	-3.27732	-3.28825	-3.31458	-3.28764	-3.28542
hsa-miR-4655-5p	0.0213492	0.00775098	0.335834	-3.08291	-3.10814	-3.01235	-3.03369	-3.07446	-3.09603	-3.22205	-3.13428	-0.500397	-2.38125	-2.41445	-3.27732	-0.510604	-1.91786	-3.28764	-0.913735
hsa-miR-4656	0.756002	1	0.832836	-3.08291	-3.10814	-3.01235	-3.03369	-3.07446	-3.09603	-3.22205	-3.13428	-3.27834	-3.32109	-3.01848	-3.27732	-1.35981	-3.31458	-3.28764	-3.28542
hsa-miR-4657	2.43e-05	0.00023796	1.15066	-3.08291	-3.10814	-3.01235	-3.03369	-3.07446	-3.09603	-3.22205	-3.13428	-3.27834	-3.32109	-3.32191	-3.27732	-3.28825	-3.31458	-3.28764	-3.28542
hsa-miR-4658	2.43e-05	0.00023796	1.15066	-3.08291	-3.10814	-3.01235	-3.03369	-3.07446	-3.09603	-3.22205	-3.13428	-3.27834	-3.32109	-3.32191	-3.27732	-3.28825	-3.31458	-3.28764	-3.28542
hsa-miR-4659a-3p	2.43e-05	0.00023796	1.15066	-3.08291	-3.10814	-3.01235	-3.03369	-3.07446	-3.09603	-3.22205	-3.13428	-3.27834	-3.32109	-3.32191	-3.27732	-3.28825	-3.31458	-3.28764	-3.28542
hsa-miR-4659a-5p	2.43e-05	0.00023796	1.15066	-3.08291	-3.10814	-3.01235	-3.03369	-3.07446	-3.09603	-3.22205	-3.13428	-3.27834	-3.32109	-3.32191	-3.27732	-3.28825	-3.31458	-3.28764	-3.28542
hsa-miR-4659b-3p	2.43e-05	0.00023796	1.15066	-3.08291	-3.10814	-3.01235	-3.03369	-3.07446	-3.09603	-3.22205	-3.13428	-3.27834	-3.32109	-3.32191	-3.27732	-3.28825	-3.31458	-3.28764	-3.28542
hsa-miR-4659b-5p	2.43e-05	0.00023796	1.15066	-3.08291	-3.10814	-3.01235	-3.03369	-3.07446	-3.09603	-3.22205	-3.13428	-3.27834	-3.32109	-3.32191	-3.27732	-3.28825	-3.31458	-3.28764	-3.28542
hsa-miR-466	2.43e-05	0.00023796	1.15066	-3.08291	-3.10814	-3.01235	-3.03369	-3.07446	-3.09603	-3.22205	-3.13428	-3.27834	-3.32109	-3.32191	-3.27732	-3.28825	-3.31458	-3.28764	-3.28542
hsa-miR-4660	2.43e-05	0.00023796	1.15066	-3.08291	-3.10814	-3.01235	-3.03369	-3.07446	-3.09603	-3.22205	-3.13428	-3.27834	-3.32109	-3.32191	-3.27732	-3.28825	-3.31458	-3.28764	-3.28542
hsa-miR-4661-3p	2.43e-05	0.00023796	1.15066	-3.08291	-3.10814	-3.01235	-3.03369	-3.07446	-3.09603	-3.22205	-3.13428	-3.27834	-3.32109	-3.32191	-3.27732	-3.28825	-3.31458	-3.28764	-3.28542
hsa-miR-4661-5p	2.43e-05	0.00023796	1.15066	-3.08291	-3.10814	-3.01235	-3.03369	-3.07446	-3.09603	-3.22205	-3.13428	-3.27834	-3.32109	-3.32191	-3.27732	-3.28825	-3.31458	-3.28764	-3.28542
hsa-miR-4662a-3p	2.43e-05	0.00023796	1.15066	-3.08291	-3.10814	-3.01235	-3.03369	-3.07446	-3.09603	-3.22205	-3.13428	-3.27834	-3.32109	-3.32191	-3.27732	-3.28825	-3.31458	-3.28764	-3.28542
hsa-miR-4662a-5p	2.43e-05	0.00023796	1.15066	-3.08291	-3.10814	-3.01235	-3.03369	-3.07446	-3.09603	-3.22205	-3.13428	-3.27834	-3.32109	-3.32191	-3.27732	-3.28825	-3.31458	-3.28764	-3.28542
hsa-miR-4662b	2.43e-05	0.00023796	1.15066	-3.08291	-3.10814	-3.01235	-3.03369	-3.07446	-3.09603	-3.22205	-3.13428	-3.27834	-3.32109	-3.32191	-3.27732	-3.28825	-3.31458	-3.28764	-3.28542
hsa-miR-4663	2.43e-05	0.00023796	1.15066	-3.08291	-3.10814	-3.01235	-3.03369	-3.07446	-3.09603	-3.22205	-3.13428	-3.27834	-3.32109	-3.32191	-3.27732	-3.28825	-3.31458	-3.28764	-3.28542
hsa-miR-4664-3p	0.0110403	0.00740819	0.204497	-3.08291	-3.10814	-3.01235	-3.03369	-3.07446	-3.09603	-3.22205	-3.13428	-3.27834	-2.41823	0.241488	-3.27732	0.0300821	-0.897512	-0.135097	-0.897512
hsa-miR-4664-5p	2.43e-05	0.00023796	1.15066	-3.08291	-3.10814	-3.01235	-3.03369	-3.07446	-3.09603	-3.22205	-3.13428	-3.27834	-3.32109	-3.32191	-3.27732	-3.28825	-3.31458	-3.28764	-3.28542
hsa-miR-4665-3p	0.000728238	0.000297097	27.845	3.60188	3.14937	6.0381	5.80537	3.87116	2.07663	0.313855	1.69706	0.313855	-1.01727	-0.867033	0.110216	-0.760021	-1.00494	-0.200924	-0.649337
hsa-miR-4665-5p	2.43e-05	0.00023796	1.15066	-3.08291	-3.10814	-3.01235	-3.03369	-3.07446	-3.09603	-3.22205	-3.13428	-3.27834	-3.32109	-3.32191	-3.27732	-3.28825	-3.31458	-3.28764	-3.28542
hsa-miR-4666a-3p	2.43e-05	0.00023796	1.15066	-3.08291	-3.10814	-3.01235	-3.03369	-3.07446	-3.09603	-3.22205	-3.13428	-3.27834	-3.32109	-3.32191	-3.27732	-3.28825	-3.31458	-3.28764	-3.28542
hsa-miR-4666a-5p	2.43e-05	0.00023796	1.15066	-3.08291	-3.10814	-3.01235	-3.03369	-3.07446	-3.09603	-3.22205	-3.13428	-3.27834	-3.32109	-3.32191	-3.27732	-3.28825	-3.31458	-3.28764	-3.28542
hsa-miR-4666b	2.43e-05	0.00023796	1.15066	-3.08291	-3.10814	-3.01235	-3.03369	-3.07446	-3.09603	-3.22205	-3.13428	-3.27834	-3.32109	-3.32191	-3.27732	-3.28825	-3.31458	-3.28764	-3.28542
hsa-miR-4667-3p	2.43e-05	0.00023796	1.15066	-3.08291	-3.10814	-3.01235	-3.03369	-3.07446	-3.09603	-3.22205	-3.13428	-3.27834	-3.32109	-3.32191	-3.27732	-3.28825	-3.31458	-3.28764	-3.28542
hsa-miR-4667-5p	2.43e-05	0.00023796	1.15066	-3.08291	-3.10814	-3.01235	-3.03369	-3.07446	-3.09603	-3.22205	-3.13428	-3.27834	-3.32109	-3.32191	-3.27732	-3.28825	-3.31458	-3.28764	-3.28542
hsa-miR-4668-3p	2.43e-05	0.00023796	1.15066	-3.08291	-3.10814	-3.01235	-3.03369	-3.07446	-3.09603	-3.22205	-3.13428	-3.27834	-3.32109	-3.32191	-3.27732	-3.28825	-3.31458	-3.28764	-3.28542
hsa-miR-4668-5p	0.401654	0.481967	1.04652	-3.08291	-3.10814	-3.01235	-3.03369	-3.07446	-3.09603	-3.22205	-3.13428	-3.27834	-3.32109	-3.32191	-3.27732	-3.28825	-2.46179	-3.28764	-3.28542
hsa-miR-4669	0.00578139	0.00716845	0.369072	-3.08291	-3.10814	-3.01235	-3.03369	-3.07446	-3.09603	1.36687	1.16172	-0.155896	0.419577	0.383673	0.383673	2.11132	0.665169	1.11159	1.05464
hsa-miR-4670-3p	2.43e-05	0.00023796	1.15066	-3.08291	-3.10814	-3.01235	-3.03369	-3.07446	-3.09603	-3.22205	-3.13428	-3.27834	-3.32109	-3.32191	-3.27732	-3.28825	-3.31458	-3.28764	-3.28542
hsa-miR-4670-5p	2.43e-05	0.00023796	1.15066	-3.08291	-3.10814	-3.01235	-3.03369	-3.07446	-3.09603	-3.22205	-3.13428	-3.27834	-3.32109	-3.32191	-3.27732	-3.28825	-3.31458	-3.28764	-3.28542
hsa-miR-4671-3p	2.43e-05	0.00023796	1.15066	-3.08291	-3.10814	-3.01235	-3.03369	-3.07446	-3.09603	-3.22205	-3.13428	-3.27834	-3.32109	-3.32191	-3.27732	-3.28825	-3.31458	-3.28764	-3.28542
hsa-miR-4671-5p	2.43e-05	0.00023796	1.15066	-3.08291	-3.10814	-3.01235	-3.03369	-3.07446	-3.09603	-3.22205	-3.13428	-3.27834	-3.32109	-3.32191	-3.27732	-3.28825	-3.31458	-3.28764	-3.28542
hsa-miR-4672	0.864396	1	0.849109	-3.08291	-3.10814	-3.01235	-3.03369	-3.07446	-3.09603	-3.22205	-3.13428	-3.27834	-3.32109	-3.32191	-3.27732	-3.28825	-1.35981	-3.28764	-3.28542
hsa-miR-4673	2.43e-05	0.00023796	1.15066	-3.08291	-3.10814	-3.01235	-3.03369	-3.07446	-3.09603	-3.22205	-3.13428	-3.27834	-3.32109	-3.32191	-3.27732	-3.28825	-3.31458	-3.28764	-3.28542
hsa-miR-4674	2.43e-05	0.00023796	1.15066	-3.08291	-3.10814	-3.01235	-3.03369	-3.07446	-3.09603	-3.22205	-3.13428	-3.27834	-3.32109	-3.32191	-3.27732	-3.28825	-3.31458	-3.28764	-3.28542
hsa-miR-4675	2.43e-05	0.00023796	1.15066	-3.08291	-3.10814	-3.01235	-3.03369	-3.07446	-3.09603	-3.22205	-3.13428	-3.27834	-3.32109	-3.32191	-3.27732	-3.28825	-3.31458	-3.28764	-3.28542
hsa-miR-4676-3p	2.43e-05	0.00023796	1.15066	-3.08291	-3.10814	-3.01235	-3.03369	-3.07446	-3.09603	-3.22205	-3.13428	-3.27834	-3.32109	-3.32191	-3.27732	-3.28825	-3.31458	-3.28764	-3.28542
hsa-miR-4676-5p	2.43e-05	0.00023796	1.15066	-3.08291	-3.10814	-3.01235	-3.03369	-3.07446	-3.09603	-3.22205	-3.13428	-3.27834	-3.32109	-3.32191	-3.27732	-3.28825	-3.31458	-3.28764	-3.28542
hsa-miR-4677-3p	2.43e-05	0.00023796	1.15066	-3.08291	-3.10814	-3.01235	-3.03369	-3.07446	-3.09603	-3.22205	-3.13428	-3.27834	-3.32109	-3.32191	-3.27732	-3.28825	-3.31458	-3.28764	-3.28542
hsa-miR-4677-5p	2.43e-05	0.00023796	1.15066	-3.08291	-3.10814	-3.01235	-3.03369	-3.07446	-3.09603	-3.22205	-3.13428	-3.27834	-3.32109	-3.32191	-3.27732	-3.28825	-3.31458	-3.28764	-3.28542
hsa-miR-4678	2.43e-05	0.00023796	1.15066	-3.08291	-3.10814	-3.01235	-3.03369	-3.07446	-3.09603	-3.22205	-3.13428	-3.27834	-3.32109	-3.32191	-3.27732	-3.28825	-3.31458	-3.28764	-3.28542
hsa-miR-4679	2.43e-05	0.00023796	1.15066	-3.08291	-3.10814	-3.01235	-3.03369	-3.07446	-3.09603	-3.22205	-3.13428	-3.27834	-3.32109	-3.32191	-3.27732	-3.28825	-3.31458	-3.28764	-3.28542
hsa-miR-4680-3p	2.43e-05	0.00023796	1.15066	-3.08291	-3.10814	-3.01235	-3.03369	-3.07446	-3.09603	-3.22205	-3.13428	-3.27834	-3.32109	-3.32191	-3.27732	-3.28825	-3.31458	-3.28764	-3.28542
hsa-miR-4680-5p	2.43e-05	0.00023796	1.15066	-3.08291	-3.10814	-3.01235	-3.03369	-3.07446	-3.09603	-3.22205	-3.13428	-3.27834	-3.32109	-3.32191	-3.27732	-3.28825	-3.31458	-3.28764	-3.28542
hsa-miR-4681	2.43e-05	0.00023796	1.15066	-3.08291	-3.10814	-3.01235	-3.03369	-3.07446	-3.09603	-3.22205	-3.13428	-3.27834	-3.32109	-3.32191	-3.27732	-3.28825	-3.31458	-3.28764	-3.28542
hsa-miR-4682	2.43e-05	0.00023796	1.15066	-3.08291	-3.10814	-3.01235	-3.03369	-3.07446	-3.09603	-3.22205	-3.13428	-3.27834	-3.32109	-3.32191	-3.27732	-3.28825	-3.31458	-3.28764	-3.28542
hsa-miR-4683	2.43e-05	0.00023796	1.15066	-3.08291	-3.10814	-3.01235	-3.03369	-3.07446	-3.09603	-3.22205	-3.13428	-3.27834	-3.32109	-3.32191	-3.27732	-3.28825	-3.31458	-3.28764	-3.28542
hsa-miR-4684-3p	2.43e-05	0.00023796	1.15066	-3.08291	-3.10814	-3.01235	-3.03369	-3.07446	-3.09603	-3.22205	-3.13428	-3.27834	-3.32109	-3.32191	-3.27732	-3.28825	-3.31458	-3.28764	-3.28542
hsa-miR-4684-5p	2.43e-05	0.00023796	1.15066	-3.08291	-3.10814	-3.01235	-3.03369	-3.07446	-3.09603	-3.22205	-3.13428	-3.27834	-3.32109	-3.32191	-3.27732	-3.28825	-3.31458	-3.28764	-3.28542
hsa-miR-4685-3p	2.43e-05	0.00023796	1.15066	-3.08291	-3.10814	-3.01235	-3.03369	-3.07446	-3.09603	-3.22205	-3.13428	-3.27834	-3.32109	-3.32191	-3.27732	-3.28825	-3.31458	-3.28764	-3.28542
hsa-miR-4685-5p	2.43e-05	0.00023796	1.15066	-3.08291	-3.10814	-3.01235	-3.03369	-3.07446	-3.09603	-3.22205	-3.13428	-3.27834	-3.32109	-3.32191	-3.27732	-3.28825	-3.31458	-3.28764	-3.28542
hsa-miR-4686	2.43e-05	0.00023796	1.15066	-3.08291	-3.10814	-3.01235	-3.03369	-3.07446	-3.09603	-3.22205	-3.13428	-3.27834	-3.32109	-3.32191	-3.27732	-3.28825	-3.31458	-3.28764	-3.28542
hsa-miR-4687-3p	0.027199	0.027339	0.43393	-3.08291	3.23318	-3.01235	-3.03369	-3.07446	2.8269	4.35597	3.41867	3.14937	3.02036	3.14937	3.30968	3.56217	3.87116	4.82129	4.35597
hsa-miR-4687-5p	2.43e-05	0.00023796	1.15066	-3.08291	-3.10814	-3.01235	-3.03369	-3.07446	-3.09603	-3.22205	-3.13428	-3.27834	-3.32109	-3.32191	-3.27732	-3.28825	-3.31458	-3.28764	-3.28542
hsa-miR-4688	0.501159	0.726109	0.642278	-3.08291	-3.10814	-3.01235	-3.03369	-3.07446	-3.09603	-3.22205	-3.13428	-3.27834	-3.32109	-3.32191	-3.27732	-0.582683	-2.47759	-3.28764	-3.28542
hsa-miR-4689	0.0538947	0.0769822	0.42729	-3.08291	-3.10814	-3.01235	-3.03369	-3.07446	-3.09603	0.0522754	-3.13428	-3.27834	-2.4158	-0.771228	-3.27732	-0.0860332	-0.649337	-0.183868	-0.106771
hsa-miR-4690-3p	2.43e-05	0.00023796	1.15066	-3.08291	-3.10814	-3.01235	-3.03369	-3.07446	-3.09603	-3.22205	-3.13428	-3.27834	-3.32109	-3.32191	-3.27732	-3.28825	-3.31458	-3.28764	-3.28542
hsa-miR-4690-5p	2.43e-05	0.00023796	1.15066	-3.08291	-3.10814	-3.01235	-3.03369	-3.07446	-3.09603	-3.22205	-3.13428	-3.27834	-3.32109	-3.32191	-3.27732	-3.28825	-3.31458	-3.28764	-3.28542
hsa-miR-4691-3p	2.43e-05	0.00023796	1.15066	-3.08291	-3.10814	-3.01235	-3.03369	-3.07446	-3.09603	-3.22205	-3.13428	-3.27834	-3.32109	-3.32191	-3.27732	-3.28825	-3.31458	-3.28764	-3.28542
hsa-miR-4691-5p	2.43e-05	0.00023796	1.15066	-3.08291	-3.10814	-3.01235	-3.03369	-3.07446	-3.09603	-3.22205	-3.13428	-3.27834	-3.32109	-3.32191	-3.27732	-3.28825	-3.31458	-3.28764	-3.28542
hsa-miR-4692	2.43e-05	0.00023796	1.15066	-3.08291	-3.10814	-3.01235	-3.03369	-3.07446	-3.09603	-3.22205	-3.13428	-3.27834	-3.32109	-3.32191	-3.27732	-3.28825	-3.31458	-3.28764	-3.28542
hsa-miR-4693-3p	2.43e-05	0.00023796	1.15066	-3.08291	-3.10814	-3.01235	-3.03369	-3.07446	-3.09603	-3.22205	-3.13428	-3.27834	-3.32109	-3.32191	-3.27732	-3.28825	-3.31458	-3.28764	-3.28542
hsa-miR-4693-5p	2.43e-05	0.00023796	1.15066	-3.08291	-3.10814	-3.01235	-3.03369	-3.07446	-3.09603	-3.22205	-3.13428	-3.27834	-3.32109	-3.32191	-3.27732	-3.28825	-3.31458	-3.28764	-3.28542
hsa-miR-4694-3p	2.43e-05	0.00023796	1.15066	-3.08291	-3.10814	-3.01235	-3.03369	-3.07446	-3.09603	-3.22205	-3.13428	-3.27834	-3.32109	-3.32191	-3.27732	-3.28825	-3.31458	-3.28764	-3.28542
hsa-miR-4694-5p	2.43e-05	0.00023796	1.15066	-3.08291	-3.10814	-3.01235	-3.03369	-3.07446	-3.09603	-3.22205	-3.13428	-3.27834	-3.32109	-3.32191	-3.27732	-3.28825	-3.31458	-3.28764	-3.28542
hsa-miR-4695-3p	2.43e-05	0.00023796	1.15066	-3.08291	-3.10814	-3.01235	-3.03369	-3.07446	-3.09603	-3.22205	-3.13428	-3.27834	-3.32109	-3.32191	-3.27732	-3.28825	-3.31458	-3.28764	-3.28542
hsa-miR-4695-5p	0.0682679	0.0484419	0.513466	-3.08291	-3.10814	-3.01235	-3.03369	-3.07446	-3.09603	-3.22205	-3.13428	-3.27834	-2.59618	-2.58589	-3.27732	-1.63667	-1.64242	-3.28764	-0.883827
hsa-miR-4696	2.43e-05	0.00023796	1.15066	-3.08291	-3.10814	-3.01235	-3.03369	-3.07446	-3.09603	-3.22205	-3.13428	-3.27834	-3.32109	-3.32191	-3.27732	-3.28825	-3.31458	-3.28764	-3.28542
hsa-miR-4697-3p	2.43e-05	0.00023796	1.15066	-3.08291	-3.10814	-3.01235	-3.03369	-3.07446	-3.09603	-3.22205	-3.13428	-3.27834	-3.32109	-3.32191	-3.27732	-3.28825	-3.31458	-3.28764	-3.28542
hsa-miR-4697-5p	2.43e-05	0.00023796	1.15066	-3.08291	-3.10814	-3.01235	-3.03369	-3.07446	-3.09603	-3.22205	-3.13428	-3.27834	-3.32109	-3.32191	-3.27732	-3.28825	-3.31458	-3.28764	-3.28542
hsa-miR-4698	2.43e-05	0.00023796	1.15066	-3.08291	-3.10814	-3.01235	-3.03369	-3.07446	-3.09603	-3.22205	-3.13428	-3.27834	-3.32109	-3.32191	-3.27732	-3.28825	-3.31458	-3.28764	-3.28542
hsa-miR-4699-3p	2.43e-05	0.00023796	1.15066	-3.08291	-3.10814	-3.01235	-3.03369	-3.07446	-3.09603	-3.22205	-3.13428	-3.27834	-3.32109	-3.32191	-3.27732	-3.28825	-3.31458	-3.28764	-3.28542
hsa-miR-4699-5p	2.43e-05	0.00023796	1.15066	-3.08291	-3.10814	-3.01235	-3.03369	-3.07446	-3.09603	-3.22205	-3.13428	-3.27834	-3.32109	-3.32191	-3.27732	-3.28825	-3.31458	-3.28764	-3.28542
hsa-miR-4700-3p	2.43e-05	0.00023796	1.15066	-3.08291	-3.10814	-3.01235	-3.03369	-3.07446	-3.09603	-3.22205	-3.13428	-3.27834	-3.32109	-3.32191	-3.27732	-3.28825	-3.31458	-3.28764	-3.28542
hsa-miR-4700-5p	2.43e-05	0.00023796	1.15066	-3.08291	-3.10814	-3.01235	-3.03369	-3.07446	-3.09603	-3.22205	-3.13428	-3.27834	-3.32109	-3.32191	-3.27732	-3.28825	-3.31458	-3.28764	-3.28542
hsa-miR-4701-3p	0.753634	1	0.75641	-3.08291	-3.10814	-3.01235	-3.03369	-3.07446	-3.09603	-3.22205	-3.13428	-3.27834	-3.32109	-3.32191	-3.27732	-3.28825	-0.930061	-3.28764	-3.28542
hsa-miR-4701-5p	2.43e-05	0.00023796	1.15066	-3.08291	-3.10814	-3.01235	-3.03369	-3.07446	-3.09603	-3.22205	-3.13428	-3.27834	-3.32109	-3.32191	-3.27732	-3.28825	-3.31458	-3.28764	-3.28542
hsa-miR-4703-3p	2.43e-05	0.00023796	1.15066	-3.08291	-3.10814	-3.01235	-3.03369	-3.07446	-3.09603	-3.22205	-3.13428	-3.27834	-3.32109	-3.32191	-3.27732	-3.28825	-3.31458	-3.28764	-3.28542
hsa-miR-4703-5p	2.43e-05	0.00023796	1.15066	-3.08291	-3.10814	-3.01235	-3.03369	-3.07446	-3.09603	-3.22205	-3.13428	-3.27834	-3.32109	-3.32191	-3.27732	-3.28825	-3.31458	-3.28764	-3.28542
hsa-miR-4704-3p	2.43e-05	0.00023796	1.15066	-3.08291	-3.10814	-3.01235	-3.03369	-3.07446	-3.09603	-3.22205	-3.13428	-3.27834	-3.32109	-3.32191	-3.27732	-3.28825	-3.31458	-3.28764	-3.28542
hsa-miR-4704-5p	2.43e-05	0.00023796	1.15066	-3.08291	-3.10814	-3.01235	-3.03369	-3.07446	-3.09603	-3.22205	-3.13428	-3.27834	-3.32109	-3.32191	-3.27732	-3.28825	-3.31458	-3.28764	-3.28542
hsa-miR-4705	2.43e-05	0.00023796	1.15066	-3.08291	-3.10814	-3.01235	-3.03369	-3.07446	-3.09603	-3.22205	-3.13428	-3.27834	-3.32109	-3.32191	-3.27732	-3.28825	-3.31458	-3.28764	-3.28542
hsa-miR-4706	2.43e-05	0.00023796	1.15066	-3.08291	-3.10814	-3.01235	-3.03369	-3.07446	-3.09603	-3.22205	-3.13428	-3.27834	-3.32109	-3.32191	-3.27732	-3.28825	-3.31458	-3.28764	-3.28542
hsa-miR-4707-3p	2.43e-05	0.00023796	1.15066	-3.08291	-3.10814	-3.01235	-3.03369	-3.07446	-3.09603	-3.22205	-3.13428	-3.27834	-3.32109	-3.32191	-3.27732	-3.28825	-3.31458	-3.28764	-3.28542
hsa-miR-4707-5p	0.0196093	0.0081418	0.298718	-3.08291	-3.10814	-3.01235	-3.03369	-3.07446	-3.09603	-3.22205	-3.13428	-0.547165	-2.39389	-2.46179	-0.106771	-1.06881	-1.09095	-3.28764	-3.28542
hsa-miR-4708-3p	2.43e-05	0.00023796	1.15066	-3.08291	-3.10814	-3.01235	-3.03369	-3.07446	-3.09603	-3.22205	-3.13428	-3.27834	-3.32109	-3.32191	-3.27732	-3.28825	-3.31458	-3.28764	-3.28542
hsa-miR-4708-5p	2.43e-05	0.00023796	1.15066	-3.08291	-3.10814	-3.01235	-3.03369	-3.07446	-3.09603	-3.22205	-3.13428	-3.27834	-3.32109	-3.32191	-3.27732	-3.28825	-3.31458	-3.28764	-3.28542
hsa-miR-4709-3p	2.43e-05	0.00023796	1.15066	-3.08291	-3.10814	-3.01235	-3.03369	-3.07446	-3.09603	-3.22205	-3.13428	-3.27834	-3.32109	-3.32191	-3.27732	-3.28825	-3.31458	-3.28764	-3.28542
hsa-miR-4709-5p	2.43e-05	0.00023796	1.15066	-3.08291	-3.10814	-3.01235	-3.03369	-3.07446	-3.09603	-3.22205	-3.13428	-3.27834	-3.32109	-3.32191	-3.27732	-3.28825	-3.31458	-3.28764	-3.28542
hsa-miR-4710	2.43e-05	0.00023796	1.15066	-3.08291	-3.10814	-3.01235	-3.03369	-3.07446	-3.09603	-3.22205	-3.13428	-3.27834	-3.32109	-3.32191	-3.27732	-3.28825	-3.31458	-3.28764	-3.28542
hsa-miR-4711-3p	2.43e-05	0.00023796	1.15066	-3.08291	-3.10814	-3.01235	-3.03369	-3.07446	-3.09603	-3.22205	-3.13428	-3.27834	-3.32109	-3.32191	-3.27732	-3.28825	-3.31458	-3.28764	-3.28542
hsa-miR-4711-5p	2.43e-05	0.00023796	1.15066	-3.08291	-3.10814	-3.01235	-3.03369	-3.07446	-3.09603	-3.22205	-3.13428	-3.27834	-3.32109	-3.32191	-3.27732	-3.28825	-3.31458	-3.28764	-3.28542
hsa-miR-4712-3p	2.43e-05	0.00023796	1.15066	-3.08291	-3.10814	-3.01235	-3.03369	-3.07446	-3.09603	-3.22205	-3.13428	-3.27834	-3.32109	-3.32191	-3.27732	-3.28825	-3.31458	-3.28764	-3.28542
hsa-miR-4712-5p	2.43e-05	0.00023796	1.15066	-3.08291	-3.10814	-3.01235	-3.03369	-3.07446	-3.09603	-3.22205	-3.13428	-3.27834	-3.32109	-3.32191	-3.27732	-3.28825	-3.31458	-3.28764	-3.28542
hsa-miR-4713-3p	0.354235	0.483113	0.599736	-3.08291	-3.10814	-3.01235	-3.03369	-3.07446	-3.09603	-3.22205	-3.13428	-3.27834	-1.12546	-1.03046	-3.27732	-3.28825	-3.31458	-3.28764	-3.28542
hsa-miR-4713-5p	2.43e-05	0.00023796	1.15066	-3.08291	-3.10814	-3.01235	-3.03369	-3.07446	-3.09603	-3.22205	-3.13428	-3.27834	-3.32109	-3.32191	-3.27732	-3.28825	-3.31458	-3.28764	-3.28542
hsa-miR-4714-3p	2.43e-05	0.00023796	1.15066	-3.08291	-3.10814	-3.01235	-3.03369	-3.07446	-3.09603	-3.22205	-3.13428	-3.27834	-3.32109	-3.32191	-3.27732	-3.28825	-3.31458	-3.28764	-3.28542
hsa-miR-4714-5p	2.43e-05	0.00023796	1.15066	-3.08291	-3.10814	-3.01235	-3.03369	-3.07446	-3.09603	-3.22205	-3.13428	-3.27834	-3.32109	-3.32191	-3.27732	-3.28825	-3.31458	-3.28764	-3.28542
hsa-miR-4715-3p	2.43e-05	0.00023796	1.15066	-3.08291	-3.10814	-3.01235	-3.03369	-3.07446	-3.09603	-3.22205	-3.13428	-3.27834	-3.32109	-3.32191	-3.27732	-3.28825	-3.31458	-3.28764	-3.28542
hsa-miR-4715-5p	2.43e-05	0.00023796	1.15066	-3.08291	-3.10814	-3.01235	-3.03369	-3.07446	-3.09603	-3.22205	-3.13428	-3.27834	-3.32109	-3.32191	-3.27732	-3.28825	-3.31458	-3.28764	-3.28542
hsa-miR-4716-3p	0.361197	0.431869	1.05182	-3.08291	-3.10814	-3.01235	-3.03369	-3.07446	-3.09603	-3.22205	-3.13428	-3.27834	-3.32109	-3.32191	-3.27732	-3.28825	-2.49808	-3.28764	-3.28542
hsa-miR-4716-5p	2.43e-05	0.00023796	1.15066	-3.08291	-3.10814	-3.01235	-3.03369	-3.07446	-3.09603	-3.22205	-3.13428	-3.27834	-3.32109	-3.32191	-3.27732	-3.28825	-3.31458	-3.28764	-3.28542
hsa-miR-4717-3p	2.43e-05	0.00023796	1.15066	-3.08291	-3.10814	-3.01235	-3.03369	-3.07446	-3.09603	-3.22205	-3.13428	-3.27834	-3.32109	-3.32191	-3.27732	-3.28825	-3.31458	-3.28764	-3.28542
hsa-miR-4717-5p	2.43e-05	0.00023796	1.15066	-3.08291	-3.10814	-3.01235	-3.03369	-3.07446	-3.09603	-3.22205	-3.13428	-3.27834	-3.32109	-3.32191	-3.27732	-3.28825	-3.31458	-3.28764	-3.28542
hsa-miR-4718	2.43e-05	0.00023796	1.15066	-3.08291	-3.10814	-3.01235	-3.03369	-3.07446	-3.09603	-3.22205	-3.13428	-3.27834	-3.32109	-3.32191	-3.27732	-3.28825	-3.31458	-3.28764	-3.28542
hsa-miR-4719	2.43e-05	0.00023796	1.15066	-3.08291	-3.10814	-3.01235	-3.03369	-3.07446	-3.09603	-3.22205	-3.13428	-3.27834	-3.32109	-3.32191	-3.27732	-3.28825	-3.31458	-3.28764	-3.28542
hsa-miR-4720-3p	2.43e-05	0.00023796	1.15066	-3.08291	-3.10814	-3.01235	-3.03369	-3.07446	-3.09603	-3.22205	-3.13428	-3.27834	-3.32109	-3.32191	-3.27732	-3.28825	-3.31458	-3.28764	-3.28542
hsa-miR-4720-5p	2.43e-05	0.00023796	1.15066	-3.08291	-3.10814	-3.01235	-3.03369	-3.07446	-3.09603	-3.22205	-3.13428	-3.27834	-3.32109	-3.32191	-3.27732	-3.28825	-3.31458	-3.28764	-3.28542
hsa-miR-4721	0.0200616	0.029266	0.27623	-3.08291	-3.10814	-3.01235	-3.03369	-3.07446	-3.09603	-3.22205	-3.13428	-3.27834	-1.10157	-0.725495	-3.27732	-3.28825	-0.547165	-0.599926	-0.582683
hsa-miR-4722-3p	2.43e-05	0.00023796	1.15066	-3.08291	-3.10814	-3.01235	-3.03369	-3.07446	-3.09603	-3.22205	-3.13428	-3.27834	-3.32109	-3.32191	-3.27732	-3.28825	-3.31458	-3.28764	-3.28542
hsa-miR-4722-5p	2.43e-05	0.00023796	1.15066	-3.08291	-3.10814	-3.01235	-3.03369	-3.07446	-3.09603	-3.22205	-3.13428	-3.27834	-3.32109	-3.32191	-3.27732	-3.28825	-3.31458	-3.28764	-3.28542
hsa-miR-4723-3p	2.43e-05	0.00023796	1.15066	-3.08291	-3.10814	-3.01235	-3.03369	-3.07446	-3.09603	-3.22205	-3.13428	-3.27834	-3.32109	-3.32191	-3.27732	-3.28825	-3.31458	-3.28764	-3.28542
hsa-miR-4723-5p	2.43e-05	0.00023796	1.15066	-3.08291	-3.10814	-3.01235	-3.03369	-3.07446	-3.09603	-3.22205	-3.13428	-3.27834	-3.32109	-3.32191	-3.27732	-3.28825	-3.31458	-3.28764	-3.28542
hsa-miR-4724-3p	2.43e-05	0.00023796	1.15066	-3.08291	-3.10814	-3.01235	-3.03369	-3.07446	-3.09603	-3.22205	-3.13428	-3.27834	-3.32109	-3.32191	-3.27732	-3.28825	-3.31458	-3.28764	-3.28542
hsa-miR-4724-5p	2.43e-05	0.00023796	1.15066	-3.08291	-3.10814	-3.01235	-3.03369	-3.07446	-3.09603	-3.22205	-3.13428	-3.27834	-3.32109	-3.32191	-3.27732	-3.28825	-3.31458	-3.28764	-3.28542
hsa-miR-4725-3p	2.43e-05	0.00023796	1.15066	-3.08291	-3.10814	-3.01235	-3.03369	-3.07446	-3.09603	-3.22205	-3.13428	-3.27834	-3.32109	-3.32191	-3.27732	-3.28825	-3.31458	-3.28764	-3.28542
hsa-miR-4725-5p	2.43e-05	0.00023796	1.15066	-3.08291	-3.10814	-3.01235	-3.03369	-3.07446	-3.09603	-3.22205	-3.13428	-3.27834	-3.32109	-3.32191	-3.27732	-3.28825	-3.31458	-3.28764	-3.28542
hsa-miR-4726-3p	2.43e-05	0.00023796	1.15066	-3.08291	-3.10814	-3.01235	-3.03369	-3.07446	-3.09603	-3.22205	-3.13428	-3.27834	-3.32109	-3.32191	-3.27732	-3.28825	-3.31458	-3.28764	-3.28542
hsa-miR-4726-5p	2.43e-05	0.00023796	1.15066	-3.08291	-3.10814	-3.01235	-3.03369	-3.07446	-3.09603	-3.22205	-3.13428	-3.27834	-3.32109	-3.32191	-3.27732	-3.28825	-3.31458	-3.28764	-3.28542
hsa-miR-4727-3p	2.43e-05	0.00023796	1.15066	-3.08291	-3.10814	-3.01235	-3.03369	-3.07446	-3.09603	-3.22205	-3.13428	-3.27834	-3.32109	-3.32191	-3.27732	-3.28825	-3.31458	-3.28764	-3.28542
hsa-miR-4727-5p	2.43e-05	0.00023796	1.15066	-3.08291	-3.10814	-3.01235	-3.03369	-3.07446	-3.09603	-3.22205	-3.13428	-3.27834	-3.32109	-3.32191	-3.27732	-3.28825	-3.31458	-3.28764	-3.28542
hsa-miR-4728-3p	2.43e-05	0.00023796	1.15066	-3.08291	-3.10814	-3.01235	-3.03369	-3.07446	-3.09603	-3.22205	-3.13428	-3.27834	-3.32109	-3.32191	-3.27732	-3.28825	-3.31458	-3.28764	-3.28542
hsa-miR-4728-5p	0.263762	0.195284	0.360678	-3.08291	-3.10814	-3.01235	-3.03369	-3.07446	-3.09603	-3.22205	-3.13428	-3.27834	-2.5823	-2.59933	-3.27732	0.747469	-2.5128	-3.28764	-3.28542
hsa-miR-4729	2.43e-05	0.00023796	1.15066	-3.08291	-3.10814	-3.01235	-3.03369	-3.07446	-3.09603	-3.22205	-3.13428	-3.27834	-3.32109	-3.32191	-3.27732	-3.28825	-3.31458	-3.28764	-3.28542
hsa-miR-4730	2.43e-05	0.00023796	1.15066	-3.08291	-3.10814	-3.01235	-3.03369	-3.07446	-3.09603	-3.22205	-3.13428	-3.27834	-3.32109	-3.32191	-3.27732	-3.28825	-3.31458	-3.28764	-3.28542
hsa-miR-4731-3p	2.43e-05	0.00023796	1.15066	-3.08291	-3.10814	-3.01235	-3.03369	-3.07446	-3.09603	-3.22205	-3.13428	-3.27834	-3.32109	-3.32191	-3.27732	-3.28825	-3.31458	-3.28764	-3.28542
hsa-miR-4731-5p	2.43e-05	0.00023796	1.15066	-3.08291	-3.10814	-3.01235	-3.03369	-3.07446	-3.09603	-3.22205	-3.13428	-3.27834	-3.32109	-3.32191	-3.27732	-3.28825	-3.31458	-3.28764	-3.28542
hsa-miR-4732-3p	2.43e-05	0.00023796	1.15066	-3.08291	-3.10814	-3.01235	-3.03369	-3.07446	-3.09603	-3.22205	-3.13428	-3.27834	-3.32109	-3.32191	-3.27732	-3.28825	-3.31458	-3.28764	-3.28542
hsa-miR-4732-5p	0.226696	0.344502	0.392101	-3.08291	-3.10814	-3.01235	-3.03369	-3.07446	-3.09603	-3.22205	-3.13428	-3.27834	-3.32109	-3.32191	-3.27732	-3.28825	-2.55871	0.0787163	-0.611199
hsa-miR-4733-3p	2.43e-05	0.00023796	1.15066	-3.08291	-3.10814	-3.01235	-3.03369	-3.07446	-3.09603	-3.22205	-3.13428	-3.27834	-3.32109	-3.32191	-3.27732	-3.28825	-3.31458	-3.28764	-3.28542
hsa-miR-4733-5p	2.43e-05	0.00023796	1.15066	-3.08291	-3.10814	-3.01235	-3.03369	-3.07446	-3.09603	-3.22205	-3.13428	-3.27834	-3.32109	-3.32191	-3.27732	-3.28825	-3.31458	-3.28764	-3.28542
hsa-miR-4734	0.38906	0.464895	1.04819	-3.08291	-3.10814	-3.01235	-3.03369	-3.07446	-3.09603	-3.22205	-3.13428	-3.27834	-3.32109	-3.32191	-3.27732	-3.28825	-2.47311	-3.28764	-3.28542
hsa-miR-4735-3p	2.43e-05	0.00023796	1.15066	-3.08291	-3.10814	-3.01235	-3.03369	-3.07446	-3.09603	-3.22205	-3.13428	-3.27834	-3.32109	-3.32191	-3.27732	-3.28825	-3.31458	-3.28764	-3.28542
hsa-miR-4735-5p	2.43e-05	0.00023796	1.15066	-3.08291	-3.10814	-3.01235	-3.03369	-3.07446	-3.09603	-3.22205	-3.13428	-3.27834	-3.32109	-3.32191	-3.27732	-3.28825	-3.31458	-3.28764	-3.28542
hsa-miR-4736	2.43e-05	0.00023796	1.15066	-3.08291	-3.10814	-3.01235	-3.03369	-3.07446	-3.09603	-3.22205	-3.13428	-3.27834	-3.32109	-3.32191	-3.27732	-3.28825	-3.31458	-3.28764	-3.28542
hsa-miR-4737	2.43e-05	0.00023796	1.15066	-3.08291	-3.10814	-3.01235	-3.03369	-3.07446	-3.09603	-3.22205	-3.13428	-3.27834	-3.32109	-3.32191	-3.27732	-3.28825	-3.31458	-3.28764	-3.28542
hsa-miR-4738-3p	0.0224472	0.0165355	0.335965	-3.08291	-3.10814	-3.01235	-3.03369	-3.07446	-3.09603	-3.22205	-3.13428	-3.27834	-2.8401	-2.36334	-3.27732	-1.03046	-0.950789	-0.481298	-0.930061
hsa-miR-4738-5p	2.43e-05	0.00023796	1.15066	-3.08291	-3.10814	-3.01235	-3.03369	-3.07446	-3.09603	-3.22205	-3.13428	-3.27834	-3.32109	-3.32191	-3.27732	-3.28825	-3.31458	-3.28764	-3.28542
hsa-miR-4739	0.0978103	0.110884	0.459785	-3.08291	-3.10814	-3.01235	-3.03369	-3.07446	-3.09603	0.592514	1.26137	-3.27834	-0.500397	-0.121499	-3.27732	0.276023	0.999929	1.32389	1.32389
hsa-miR-4740-3p	2.43e-05	0.00023796	1.15066	-3.08291	-3.10814	-3.01235	-3.03369	-3.07446	-3.09603	-3.22205	-3.13428	-3.27834	-3.32109	-3.32191	-3.27732	-3.28825	-3.31458	-3.28764	-3.28542
hsa-miR-4740-5p	2.43e-05	0.00023796	1.15066	-3.08291	-3.10814	-3.01235	-3.03369	-3.07446	-3.09603	-3.22205	-3.13428	-3.27834	-3.32109	-3.32191	-3.27732	-3.28825	-3.31458	-3.28764	-3.28542
hsa-miR-4741	0.0536312	0.0569391	0.566673	-3.08291	-3.10814	-3.01235	-3.03369	-3.07446	3.20967	2.11132	-3.13428	-1.00494	-0.855729	-0.510604	-0.771228	1.68692	1.76003	2.47753	3.41867
hsa-miR-4742-3p	2.43e-05	0.00023796	1.15066	-3.08291	-3.10814	-3.01235	-3.03369	-3.07446	-3.09603	-3.22205	-3.13428	-3.27834	-3.32109	-3.32191	-3.27732	-3.28825	-3.31458	-3.28764	-3.28542
hsa-miR-4742-5p	2.43e-05	0.00023796	1.15066	-3.08291	-3.10814	-3.01235	-3.03369	-3.07446	-3.09603	-3.22205	-3.13428	-3.27834	-3.32109	-3.32191	-3.27732	-3.28825	-3.31458	-3.28764	-3.28542
hsa-miR-4743-3p	2.43e-05	0.00023796	1.15066	-3.08291	-3.10814	-3.01235	-3.03369	-3.07446	-3.09603	-3.22205	-3.13428	-3.27834	-3.32109	-3.32191	-3.27732	-3.28825	-3.31458	-3.28764	-3.28542
hsa-miR-4743-5p	2.43e-05	0.00023796	1.15066	-3.08291	-3.10814	-3.01235	-3.03369	-3.07446	-3.09603	-3.22205	-3.13428	-3.27834	-3.32109	-3.32191	-3.27732	-3.28825	-3.31458	-3.28764	-3.28542
hsa-miR-4744	2.43e-05	0.00023796	1.15066	-3.08291	-3.10814	-3.01235	-3.03369	-3.07446	-3.09603	-3.22205	-3.13428	-3.27834	-3.32109	-3.32191	-3.27732	-3.28825	-3.31458	-3.28764	-3.28542
hsa-miR-4745-3p	2.43e-05	0.00023796	1.15066	-3.08291	-3.10814	-3.01235	-3.03369	-3.07446	-3.09603	-3.22205	-3.13428	-3.27834	-3.32109	-3.32191	-3.27732	-3.28825	-3.31458	-3.28764	-3.28542
hsa-miR-4745-5p	0.116621	0.201458	0.334913	-3.08291	-3.10814	-3.01235	-3.03369	-3.07446	-3.09603	-3.22205	-3.13428	-3.27834	-2.90307	-3.32191	-3.27732	-3.28825	-0.883827	-0.215514	-0.231738
hsa-miR-4746-3p	0.537623	0.628506	1.02816	-3.08291	-3.10814	-3.01235	-3.03369	-3.07446	-3.09603	-3.22205	-3.13428	-3.27834	-2.52574	-3.01848	-3.27732	-3.28825	-3.31458	-3.28764	-3.28542
hsa-miR-4746-5p	2.43e-05	0.00023796	1.15066	-3.08291	-3.10814	-3.01235	-3.03369	-3.07446	-3.09603	-3.22205	-3.13428	-3.27834	-3.32109	-3.32191	-3.27732	-3.28825	-3.31458	-3.28764	-3.28542
hsa-miR-4747-3p	2.43e-05	0.00023796	1.15066	-3.08291	-3.10814	-3.01235	-3.03369	-3.07446	-3.09603	-3.22205	-3.13428	-3.27834	-3.32109	-3.32191	-3.27732	-3.28825	-3.31458	-3.28764	-3.28542
hsa-miR-4747-5p	2.43e-05	0.00023796	1.15066	-3.08291	-3.10814	-3.01235	-3.03369	-3.07446	-3.09603	-3.22205	-3.13428	-3.27834	-3.32109	-3.32191	-3.27732	-3.28825	-3.31458	-3.28764	-3.28542
hsa-miR-4748	2.43e-05	0.00023796	1.15066	-3.08291	-3.10814	-3.01235	-3.03369	-3.07446	-3.09603	-3.22205	-3.13428	-3.27834	-3.32109	-3.32191	-3.27732	-3.28825	-3.31458	-3.28764	-3.28542
hsa-miR-4749-3p	2.43e-05	0.00023796	1.15066	-3.08291	-3.10814	-3.01235	-3.03369	-3.07446	-3.09603	-3.22205	-3.13428	-3.27834	-3.32109	-3.32191	-3.27732	-3.28825	-3.31458	-3.28764	-3.28542
hsa-miR-4749-5p	2.43e-05	0.00023796	1.15066	-3.08291	-3.10814	-3.01235	-3.03369	-3.07446	-3.09603	-3.22205	-3.13428	-3.27834	-3.32109	-3.32191	-3.27732	-3.28825	-3.31458	-3.28764	-3.28542
hsa-miR-4750-5p	2.43e-05	0.00023796	1.15066	-3.08291	-3.10814	-3.01235	-3.03369	-3.07446	-3.09603	-3.22205	-3.13428	-3.27834	-3.32109	-3.32191	-3.27732	-3.28825	-3.31458	-3.28764	-3.28542
hsa-miR-4751	2.43e-05	0.00023796	1.15066	-3.08291	-3.10814	-3.01235	-3.03369	-3.07446	-3.09603	-3.22205	-3.13428	-3.27834	-3.32109	-3.32191	-3.27732	-3.28825	-3.31458	-3.28764	-3.28542
hsa-miR-4752	2.43e-05	0.00023796	1.15066	-3.08291	-3.10814	-3.01235	-3.03369	-3.07446	-3.09603	-3.22205	-3.13428	-3.27834	-3.32109	-3.32191	-3.27732	-3.28825	-3.31458	-3.28764	-3.28542
hsa-miR-4753-3p	2.43e-05	0.00023796	1.15066	-3.08291	-3.10814	-3.01235	-3.03369	-3.07446	-3.09603	-3.22205	-3.13428	-3.27834	-3.32109	-3.32191	-3.27732	-3.28825	-3.31458	-3.28764	-3.28542
hsa-miR-4753-5p	2.43e-05	0.00023796	1.15066	-3.08291	-3.10814	-3.01235	-3.03369	-3.07446	-3.09603	-3.22205	-3.13428	-3.27834	-3.32109	-3.32191	-3.27732	-3.28825	-3.31458	-3.28764	-3.28542
hsa-miR-4754	2.43e-05	0.00023796	1.15066	-3.08291	-3.10814	-3.01235	-3.03369	-3.07446	-3.09603	-3.22205	-3.13428	-3.27834	-3.32109	-3.32191	-3.27732	-3.28825	-3.31458	-3.28764	-3.28542
hsa-miR-4755-3p	2.43e-05	0.00023796	1.15066	-3.08291	-3.10814	-3.01235	-3.03369	-3.07446	-3.09603	-3.22205	-3.13428	-3.27834	-3.32109	-3.32191	-3.27732	-3.28825	-3.31458	-3.28764	-3.28542
hsa-miR-4755-5p	2.43e-05	0.00023796	1.15066	-3.08291	-3.10814	-3.01235	-3.03369	-3.07446	-3.09603	-3.22205	-3.13428	-3.27834	-3.32109	-3.32191	-3.27732	-3.28825	-3.31458	-3.28764	-3.28542
hsa-miR-4756-3p	2.43e-05	0.00023796	1.15066	-3.08291	-3.10814	-3.01235	-3.03369	-3.07446	-3.09603	-3.22205	-3.13428	-3.27834	-3.32109	-3.32191	-3.27732	-3.28825	-3.31458	-3.28764	-3.28542
hsa-miR-4756-5p	2.43e-05	0.00023796	1.15066	-3.08291	-3.10814	-3.01235	-3.03369	-3.07446	-3.09603	-3.22205	-3.13428	-3.27834	-3.32109	-3.32191	-3.27732	-3.28825	-3.31458	-3.28764	-3.28542
hsa-miR-4757-3p	2.43e-05	0.00023796	1.15066	-3.08291	-3.10814	-3.01235	-3.03369	-3.07446	-3.09603	-3.22205	-3.13428	-3.27834	-3.32109	-3.32191	-3.27732	-3.28825	-3.31458	-3.28764	-3.28542
hsa-miR-4757-5p	2.43e-05	0.00023796	1.15066	-3.08291	-3.10814	-3.01235	-3.03369	-3.07446	-3.09603	-3.22205	-3.13428	-3.27834	-3.32109	-3.32191	-3.27732	-3.28825	-3.31458	-3.28764	-3.28542
hsa-miR-4758-3p	2.43e-05	0.00023796	1.15066	-3.08291	-3.10814	-3.01235	-3.03369	-3.07446	-3.09603	-3.22205	-3.13428	-3.27834	-3.32109	-3.32191	-3.27732	-3.28825	-3.31458	-3.28764	-3.28542
hsa-miR-4758-5p	0.259465	0.25019	1.05481	-3.08291	-3.10814	-3.01235	-3.03369	-3.07446	-3.09603	-3.22205	-3.13428	-3.27834	-2.85805	-2.87708	-3.27732	-3.28825	-3.31458	-3.28764	-3.28542
hsa-miR-4759	2.43e-05	0.00023796	1.15066	-3.08291	-3.10814	-3.01235	-3.03369	-3.07446	-3.09603	-3.22205	-3.13428	-3.27834	-3.32109	-3.32191	-3.27732	-3.28825	-3.31458	-3.28764	-3.28542
hsa-miR-4760-3p	2.43e-05	0.00023796	1.15066	-3.08291	-3.10814	-3.01235	-3.03369	-3.07446	-3.09603	-3.22205	-3.13428	-3.27834	-3.32109	-3.32191	-3.27732	-3.28825	-3.31458	-3.28764	-3.28542
hsa-miR-4760-5p	2.43e-05	0.00023796	1.15066	-3.08291	-3.10814	-3.01235	-3.03369	-3.07446	-3.09603	-3.22205	-3.13428	-3.27834	-3.32109	-3.32191	-3.27732	-3.28825	-3.31458	-3.28764	-3.28542
hsa-miR-4761-3p	2.43e-05	0.00023796	1.15066	-3.08291	-3.10814	-3.01235	-3.03369	-3.07446	-3.09603	-3.22205	-3.13428	-3.27834	-3.32109	-3.32191	-3.27732	-3.28825	-3.31458	-3.28764	-3.28542
hsa-miR-4761-5p	2.43e-05	0.00023796	1.15066	-3.08291	-3.10814	-3.01235	-3.03369	-3.07446	-3.09603	-3.22205	-3.13428	-3.27834	-3.32109	-3.32191	-3.27732	-3.28825	-3.31458	-3.28764	-3.28542
hsa-miR-4762-3p	2.43e-05	0.00023796	1.15066	-3.08291	-3.10814	-3.01235	-3.03369	-3.07446	-3.09603	-3.22205	-3.13428	-3.27834	-3.32109	-3.32191	-3.27732	-3.28825	-3.31458	-3.28764	-3.28542
hsa-miR-4762-5p	2.43e-05	0.00023796	1.15066	-3.08291	-3.10814	-3.01235	-3.03369	-3.07446	-3.09603	-3.22205	-3.13428	-3.27834	-3.32109	-3.32191	-3.27732	-3.28825	-3.31458	-3.28764	-3.28542
hsa-miR-4763-3p	0.0321992	0.0260586	0.645196	-3.08291	3.07327	-3.01235	-3.03369	-3.07446	-3.09603	3.94615	2.0349	1.16172	1.26137	1.76003	1.76003	2.56957	2.8269	3.07327	3.50579
hsa-miR-4763-5p	2.43e-05	0.00023796	1.15066	-3.08291	-3.10814	-3.01235	-3.03369	-3.07446	-3.09603	-3.22205	-3.13428	-3.27834	-3.32109	-3.32191	-3.27732	-3.28825	-3.31458	-3.28764	-3.28542
hsa-miR-4764-3p	2.43e-05	0.00023796	1.15066	-3.08291	-3.10814	-3.01235	-3.03369	-3.07446	-3.09603	-3.22205	-3.13428	-3.27834	-3.32109	-3.32191	-3.27732	-3.28825	-3.31458	-3.28764	-3.28542
hsa-miR-4764-5p	2.43e-05	0.00023796	1.15066	-3.08291	-3.10814	-3.01235	-3.03369	-3.07446	-3.09603	-3.22205	-3.13428	-3.27834	-3.32109	-3.32191	-3.27732	-3.28825	-3.31458	-3.28764	-3.28542
hsa-miR-4765	2.43e-05	0.00023796	1.15066	-3.08291	-3.10814	-3.01235	-3.03369	-3.07446	-3.09603	-3.22205	-3.13428	-3.27834	-3.32109	-3.32191	-3.27732	-3.28825	-3.31458	-3.28764	-3.28542
hsa-miR-4766-3p	2.43e-05	0.00023796	1.15066	-3.08291	-3.10814	-3.01235	-3.03369	-3.07446	-3.09603	-3.22205	-3.13428	-3.27834	-3.32109	-3.32191	-3.27732	-3.28825	-3.31458	-3.28764	-3.28542
hsa-miR-4766-5p	2.43e-05	0.00023796	1.15066	-3.08291	-3.10814	-3.01235	-3.03369	-3.07446	-3.09603	-3.22205	-3.13428	-3.27834	-3.32109	-3.32191	-3.27732	-3.28825	-3.31458	-3.28764	-3.28542
hsa-miR-4767	0.12241	0.122613	0.427442	-3.08291	-3.10814	-3.01235	-3.03369	-3.07446	-3.09603	-0.135097	-3.13428	-3.27834	-1.03046	0.313855	0.313855	-3.28825	-1.10157	-1.63667	-3.28542
hsa-miR-4768-3p	2.43e-05	0.00023796	1.15066	-3.08291	-3.10814	-3.01235	-3.03369	-3.07446	-3.09603	-3.22205	-3.13428	-3.27834	-3.32109	-3.32191	-3.27732	-3.28825	-3.31458	-3.28764	-3.28542
hsa-miR-4768-5p	2.43e-05	0.00023796	1.15066	-3.08291	-3.10814	-3.01235	-3.03369	-3.07446	-3.09603	-3.22205	-3.13428	-3.27834	-3.32109	-3.32191	-3.27732	-3.28825	-3.31458	-3.28764	-3.28542
hsa-miR-4769-3p	2.43e-05	0.00023796	1.15066	-3.08291	-3.10814	-3.01235	-3.03369	-3.07446	-3.09603	-3.22205	-3.13428	-3.27834	-3.32109	-3.32191	-3.27732	-3.28825	-3.31458	-3.28764	-3.28542
hsa-miR-4769-5p	2.43e-05	0.00023796	1.15066	-3.08291	-3.10814	-3.01235	-3.03369	-3.07446	-3.09603	-3.22205	-3.13428	-3.27834	-3.32109	-3.32191	-3.27732	-3.28825	-3.31458	-3.28764	-3.28542
hsa-miR-4770	2.43e-05	0.00023796	1.15066	-3.08291	-3.10814	-3.01235	-3.03369	-3.07446	-3.09603	-3.22205	-3.13428	-3.27834	-3.32109	-3.32191	-3.27732	-3.28825	-3.31458	-3.28764	-3.28542
hsa-miR-4771	2.43e-05	0.00023796	1.15066	-3.08291	-3.10814	-3.01235	-3.03369	-3.07446	-3.09603	-3.22205	-3.13428	-3.27834	-3.32109	-3.32191	-3.27732	-3.28825	-3.31458	-3.28764	-3.28542
hsa-miR-4772-3p	2.43e-05	0.00023796	1.15066	-3.08291	-3.10814	-3.01235	-3.03369	-3.07446	-3.09603	-3.22205	-3.13428	-3.27834	-3.32109	-3.32191	-3.27732	-3.28825	-3.31458	-3.28764	-3.28542
hsa-miR-4772-5p	2.43e-05	0.00023796	1.15066	-3.08291	-3.10814	-3.01235	-3.03369	-3.07446	-3.09603	-3.22205	-3.13428	-3.27834	-3.32109	-3.32191	-3.27732	-3.28825	-3.31458	-3.28764	-3.28542
hsa-miR-4773	2.43e-05	0.00023796	1.15066	-3.08291	-3.10814	-3.01235	-3.03369	-3.07446	-3.09603	-3.22205	-3.13428	-3.27834	-3.32109	-3.32191	-3.27732	-3.28825	-3.31458	-3.28764	-3.28542
hsa-miR-4774-3p	2.43e-05	0.00023796	1.15066	-3.08291	-3.10814	-3.01235	-3.03369	-3.07446	-3.09603	-3.22205	-3.13428	-3.27834	-3.32109	-3.32191	-3.27732	-3.28825	-3.31458	-3.28764	-3.28542
hsa-miR-4774-5p	2.43e-05	0.00023796	1.15066	-3.08291	-3.10814	-3.01235	-3.03369	-3.07446	-3.09603	-3.22205	-3.13428	-3.27834	-3.32109	-3.32191	-3.27732	-3.28825	-3.31458	-3.28764	-3.28542
hsa-miR-4775	2.43e-05	0.00023796	1.15066	-3.08291	-3.10814	-3.01235	-3.03369	-3.07446	-3.09603	-3.22205	-3.13428	-3.27834	-3.32109	-3.32191	-3.27732	-3.28825	-3.31458	-3.28764	-3.28542
hsa-miR-4776-3p	2.43e-05	0.00023796	1.15066	-3.08291	-3.10814	-3.01235	-3.03369	-3.07446	-3.09603	-3.22205	-3.13428	-3.27834	-3.32109	-3.32191	-3.27732	-3.28825	-3.31458	-3.28764	-3.28542
hsa-miR-4776-5p	0.683507	1	0.664788	-3.08291	-3.10814	-3.01235	-3.03369	-3.07446	-3.09603	-3.22205	-3.13428	-3.27834	-3.32109	-3.32191	-3.27732	-3.28825	-0.52384	-3.28764	-3.28542
hsa-miR-4777-3p	2.43e-05	0.00023796	1.15066	-3.08291	-3.10814	-3.01235	-3.03369	-3.07446	-3.09603	-3.22205	-3.13428	-3.27834	-3.32109	-3.32191	-3.27732	-3.28825	-3.31458	-3.28764	-3.28542
hsa-miR-4777-5p	2.43e-05	0.00023796	1.15066	-3.08291	-3.10814	-3.01235	-3.03369	-3.07446	-3.09603	-3.22205	-3.13428	-3.27834	-3.32109	-3.32191	-3.27732	-3.28825	-3.31458	-3.28764	-3.28542
hsa-miR-4778-3p	2.43e-05	0.00023796	1.15066	-3.08291	-3.10814	-3.01235	-3.03369	-3.07446	-3.09603	-3.22205	-3.13428	-3.27834	-3.32109	-3.32191	-3.27732	-3.28825	-3.31458	-3.28764	-3.28542
hsa-miR-4778-5p	0.0178248	0.00740819	0.255589	-3.08291	-3.10814	-3.01235	-3.03369	-3.07446	-3.09603	-3.22205	-3.13428	-3.27834	-2.3676	-2.41052	-3.27732	-0.155896	-0.135097	-0.760021	-0.559837
hsa-miR-4779	2.43e-05	0.00023796	1.15066	-3.08291	-3.10814	-3.01235	-3.03369	-3.07446	-3.09603	-3.22205	-3.13428	-3.27834	-3.32109	-3.32191	-3.27732	-3.28825	-3.31458	-3.28764	-3.28542
hsa-miR-4780	2.43e-05	0.00023796	1.15066	-3.08291	-3.10814	-3.01235	-3.03369	-3.07446	-3.09603	-3.22205	-3.13428	-3.27834	-3.32109	-3.32191	-3.27732	-3.28825	-3.31458	-3.28764	-3.28542
hsa-miR-4781-3p	2.43e-05	0.00023796	1.15066	-3.08291	-3.10814	-3.01235	-3.03369	-3.07446	-3.09603	-3.22205	-3.13428	-3.27834	-3.32109	-3.32191	-3.27732	-3.28825	-3.31458	-3.28764	-3.28542
hsa-miR-4781-5p	2.43e-05	0.00023796	1.15066	-3.08291	-3.10814	-3.01235	-3.03369	-3.07446	-3.09603	-3.22205	-3.13428	-3.27834	-3.32109	-3.32191	-3.27732	-3.28825	-3.31458	-3.28764	-3.28542
hsa-miR-4782-3p	2.43e-05	0.00023796	1.15066	-3.08291	-3.10814	-3.01235	-3.03369	-3.07446	-3.09603	-3.22205	-3.13428	-3.27834	-3.32109	-3.32191	-3.27732	-3.28825	-3.31458	-3.28764	-3.28542
hsa-miR-4782-5p	2.43e-05	0.00023796	1.15066	-3.08291	-3.10814	-3.01235	-3.03369	-3.07446	-3.09603	-3.22205	-3.13428	-3.27834	-3.32109	-3.32191	-3.27732	-3.28825	-3.31458	-3.28764	-3.28542
hsa-miR-4783-3p	2.43e-05	0.00023796	1.15066	-3.08291	-3.10814	-3.01235	-3.03369	-3.07446	-3.09603	-3.22205	-3.13428	-3.27834	-3.32109	-3.32191	-3.27732	-3.28825	-3.31458	-3.28764	-3.28542
hsa-miR-4783-5p	2.43e-05	0.00023796	1.15066	-3.08291	-3.10814	-3.01235	-3.03369	-3.07446	-3.09603	-3.22205	-3.13428	-3.27834	-3.32109	-3.32191	-3.27732	-3.28825	-3.31458	-3.28764	-3.28542
hsa-miR-4784	2.43e-05	0.00023796	1.15066	-3.08291	-3.10814	-3.01235	-3.03369	-3.07446	-3.09603	-3.22205	-3.13428	-3.27834	-3.32109	-3.32191	-3.27732	-3.28825	-3.31458	-3.28764	-3.28542
hsa-miR-4785	2.43e-05	0.00023796	1.15066	-3.08291	-3.10814	-3.01235	-3.03369	-3.07446	-3.09603	-3.22205	-3.13428	-3.27834	-3.32109	-3.32191	-3.27732	-3.28825	-3.31458	-3.28764	-3.28542
hsa-miR-4786-3p	2.43e-05	0.00023796	1.15066	-3.08291	-3.10814	-3.01235	-3.03369	-3.07446	-3.09603	-3.22205	-3.13428	-3.27834	-3.32109	-3.32191	-3.27732	-3.28825	-3.31458	-3.28764	-3.28542
hsa-miR-4786-5p	2.43e-05	0.00023796	1.15066	-3.08291	-3.10814	-3.01235	-3.03369	-3.07446	-3.09603	-3.22205	-3.13428	-3.27834	-3.32109	-3.32191	-3.27732	-3.28825	-3.31458	-3.28764	-3.28542
hsa-miR-4787-3p	0.446114	0.477395	0.735521	-3.08291	-3.10814	-3.01235	-3.03369	-3.07446	-3.09603	-3.22205	-3.13428	-3.27834	-3.32109	-3.32191	-3.27732	-3.28825	-1.5766	-1.61201	-3.28542
hsa-miR-4787-5p	0.00728087	0.00842566	0.298014	-3.08291	-3.10814	-3.01235	-3.03369	-3.07446	-3.09603	-0.0168114	1.1931	2.56957	-0.536773	-0.930061	-0.536773	-0.547165	1.36687	0.00774522	0.358231
hsa-miR-4788	0.00479428	0.00583818	0.289214	-3.08291	4.0874	-3.01235	-3.03369	-3.07446	-3.09603	0.53678	1.0139	0.110216	3.07327	3.41867	2.14251	4.16951	1.22605	4.16951	3.30968
hsa-miR-4789-3p	2.43e-05	0.00023796	1.15066	-3.08291	-3.10814	-3.01235	-3.03369	-3.07446	-3.09603	-3.22205	-3.13428	-3.27834	-3.32109	-3.32191	-3.27732	-3.28825	-3.31458	-3.28764	-3.28542
hsa-miR-4789-5p	2.43e-05	0.00023796	1.15066	-3.08291	-3.10814	-3.01235	-3.03369	-3.07446	-3.09603	-3.22205	-3.13428	-3.27834	-3.32109	-3.32191	-3.27732	-3.28825	-3.31458	-3.28764	-3.28542
hsa-miR-4790-3p	2.43e-05	0.00023796	1.15066	-3.08291	-3.10814	-3.01235	-3.03369	-3.07446	-3.09603	-3.22205	-3.13428	-3.27834	-3.32109	-3.32191	-3.27732	-3.28825	-3.31458	-3.28764	-3.28542
hsa-miR-4790-5p	2.43e-05	0.00023796	1.15066	-3.08291	-3.10814	-3.01235	-3.03369	-3.07446	-3.09603	-3.22205	-3.13428	-3.27834	-3.32109	-3.32191	-3.27732	-3.28825	-3.31458	-3.28764	-3.28542
hsa-miR-4791	2.43e-05	0.00023796	1.15066	-3.08291	-3.10814	-3.01235	-3.03369	-3.07446	-3.09603	-3.22205	-3.13428	-3.27834	-3.32109	-3.32191	-3.27732	-3.28825	-3.31458	-3.28764	-3.28542
hsa-miR-4792	2.43e-05	0.00023796	1.15066	-3.08291	-3.10814	-3.01235	-3.03369	-3.07446	-3.09603	-3.22205	-3.13428	-3.27834	-3.32109	-3.32191	-3.27732	-3.28825	-3.31458	-3.28764	-3.28542
hsa-miR-4793-3p	2.43e-05	0.00023796	1.15066	-3.08291	-3.10814	-3.01235	-3.03369	-3.07446	-3.09603	-3.22205	-3.13428	-3.27834	-3.32109	-3.32191	-3.27732	-3.28825	-3.31458	-3.28764	-3.28542
hsa-miR-4793-5p	0.500597	0.649991	1.03288	-3.08291	-3.10814	-3.01235	-3.03369	-3.07446	-3.09603	-3.22205	-3.13428	-3.27834	-3.32109	-3.32191	-3.27732	-3.28825	-2.37075	-3.28764	-3.28542
hsa-miR-4794	2.43e-05	0.00023796	1.15066	-3.08291	-3.10814	-3.01235	-3.03369	-3.07446	-3.09603	-3.22205	-3.13428	-3.27834	-3.32109	-3.32191	-3.27732	-3.28825	-3.31458	-3.28764	-3.28542
hsa-miR-4795-3p	2.43e-05	0.00023796	1.15066	-3.08291	-3.10814	-3.01235	-3.03369	-3.07446	-3.09603	-3.22205	-3.13428	-3.27834	-3.32109	-3.32191	-3.27732	-3.28825	-3.31458	-3.28764	-3.28542
hsa-miR-4795-5p	2.43e-05	0.00023796	1.15066	-3.08291	-3.10814	-3.01235	-3.03369	-3.07446	-3.09603	-3.22205	-3.13428	-3.27834	-3.32109	-3.32191	-3.27732	-3.28825	-3.31458	-3.28764	-3.28542
hsa-miR-4796-3p	2.43e-05	0.00023796	1.15066	-3.08291	-3.10814	-3.01235	-3.03369	-3.07446	-3.09603	-3.22205	-3.13428	-3.27834	-3.32109	-3.32191	-3.27732	-3.28825	-3.31458	-3.28764	-3.28542
hsa-miR-4796-5p	2.43e-05	0.00023796	1.15066	-3.08291	-3.10814	-3.01235	-3.03369	-3.07446	-3.09603	-3.22205	-3.13428	-3.27834	-3.32109	-3.32191	-3.27732	-3.28825	-3.31458	-3.28764	-3.28542
hsa-miR-4797-3p	2.43e-05	0.00023796	1.15066	-3.08291	-3.10814	-3.01235	-3.03369	-3.07446	-3.09603	-3.22205	-3.13428	-3.27834	-3.32109	-3.32191	-3.27732	-3.28825	-3.31458	-3.28764	-3.28542
hsa-miR-4797-5p	2.43e-05	0.00023796	1.15066	-3.08291	-3.10814	-3.01235	-3.03369	-3.07446	-3.09603	-3.22205	-3.13428	-3.27834	-3.32109	-3.32191	-3.27732	-3.28825	-3.31458	-3.28764	-3.28542
hsa-miR-4798-3p	2.43e-05	0.00023796	1.15066	-3.08291	-3.10814	-3.01235	-3.03369	-3.07446	-3.09603	-3.22205	-3.13428	-3.27834	-3.32109	-3.32191	-3.27732	-3.28825	-3.31458	-3.28764	-3.28542
hsa-miR-4798-5p	2.43e-05	0.00023796	1.15066	-3.08291	-3.10814	-3.01235	-3.03369	-3.07446	-3.09603	-3.22205	-3.13428	-3.27834	-3.32109	-3.32191	-3.27732	-3.28825	-3.31458	-3.28764	-3.28542
hsa-miR-4799-3p	2.43e-05	0.00023796	1.15066	-3.08291	-3.10814	-3.01235	-3.03369	-3.07446	-3.09603	-3.22205	-3.13428	-3.27834	-3.32109	-3.32191	-3.27732	-3.28825	-3.31458	-3.28764	-3.28542
hsa-miR-4799-5p	2.43e-05	0.00023796	1.15066	-3.08291	-3.10814	-3.01235	-3.03369	-3.07446	-3.09603	-3.22205	-3.13428	-3.27834	-3.32109	-3.32191	-3.27732	-3.28825	-3.31458	-3.28764	-3.28542
hsa-miR-4800-3p	2.43e-05	0.00023796	1.15066	-3.08291	-3.10814	-3.01235	-3.03369	-3.07446	-3.09603	-3.22205	-3.13428	-3.27834	-3.32109	-3.32191	-3.27732	-3.28825	-3.31458	-3.28764	-3.28542
hsa-miR-4800-5p	0.00495645	0.00740819	0.157052	-3.08291	-3.10814	-3.01235	-3.03369	-3.07446	-3.09603	-3.22205	-3.13428	-3.27834	-0.636215	-0.980708	-3.27732	0.300676	0.289442	0.160329	0.0522754
hsa-miR-4801	2.43e-05	0.00023796	1.15066	-3.08291	-3.10814	-3.01235	-3.03369	-3.07446	-3.09603	-3.22205	-3.13428	-3.27834	-3.32109	-3.32191	-3.27732	-3.28825	-3.31458	-3.28764	-3.28542
hsa-miR-4802-3p	2.43e-05	0.00023796	1.15066	-3.08291	-3.10814	-3.01235	-3.03369	-3.07446	-3.09603	-3.22205	-3.13428	-3.27834	-3.32109	-3.32191	-3.27732	-3.28825	-3.31458	-3.28764	-3.28542
hsa-miR-4802-5p	2.43e-05	0.00023796	1.15066	-3.08291	-3.10814	-3.01235	-3.03369	-3.07446	-3.09603	-3.22205	-3.13428	-3.27834	-3.32109	-3.32191	-3.27732	-3.28825	-3.31458	-3.28764	-3.28542
hsa-miR-4803	2.43e-05	0.00023796	1.15066	-3.08291	-3.10814	-3.01235	-3.03369	-3.07446	-3.09603	-3.22205	-3.13428	-3.27834	-3.32109	-3.32191	-3.27732	-3.28825	-3.31458	-3.28764	-3.28542
hsa-miR-4804-3p	2.43e-05	0.00023796	1.15066	-3.08291	-3.10814	-3.01235	-3.03369	-3.07446	-3.09603	-3.22205	-3.13428	-3.27834	-3.32109	-3.32191	-3.27732	-3.28825	-3.31458	-3.28764	-3.28542
hsa-miR-4804-5p	2.43e-05	0.00023796	1.15066	-3.08291	-3.10814	-3.01235	-3.03369	-3.07446	-3.09603	-3.22205	-3.13428	-3.27834	-3.32109	-3.32191	-3.27732	-3.28825	-3.31458	-3.28764	-3.28542
hsa-miR-483-3p	2.43e-05	0.00023796	1.15066	-3.08291	-3.10814	-3.01235	-3.03369	-3.07446	-3.09603	-3.22205	-3.13428	-3.27834	-3.32109	-3.32191	-3.27732	-3.28825	-3.31458	-3.28764	-3.28542
hsa-miR-483-5p	0.000870329	0.00141517	0.107933	-3.08291	-3.10814	-3.01235	-3.03369	-3.07446	-3.09603	-3.22205	-3.13428	-0.930061	-0.547165	-0.500397	-3.27732	1.26137	1.0139	0.0300821	0.289442
hsa-miR-484	2.43e-05	0.00023796	1.15066	-3.08291	-3.10814	-3.01235	-3.03369	-3.07446	-3.09603	-3.22205	-3.13428	-3.27834	-3.32109	-3.32191	-3.27732	-3.28825	-3.31458	-3.28764	-3.28542
hsa-miR-485-3p	2.43e-05	0.00023796	1.15066	-3.08291	-3.10814	-3.01235	-3.03369	-3.07446	-3.09603	-3.22205	-3.13428	-3.27834	-3.32109	-3.32191	-3.27732	-3.28825	-3.31458	-3.28764	-3.28542
hsa-miR-485-5p	2.43e-05	0.00023796	1.15066	-3.08291	-3.10814	-3.01235	-3.03369	-3.07446	-3.09603	-3.22205	-3.13428	-3.27834	-3.32109	-3.32191	-3.27732	-3.28825	-3.31458	-3.28764	-3.28542
hsa-miR-486-3p	2.43e-05	0.00023796	1.15066	-3.08291	-3.10814	-3.01235	-3.03369	-3.07446	-3.09603	-3.22205	-3.13428	-3.27834	-3.32109	-3.32191	-3.27732	-3.28825	-3.31458	-3.28764	-3.28542
hsa-miR-486-5p	0.488825	0.664125	0.638557	-3.08291	-3.10814	-3.01235	-3.03369	-3.07446	-3.09603	-3.22205	-3.13428	-3.27834	-3.32109	-3.32191	-3.27732	-3.28825	-2.41052	-0.582683	-3.28542
hsa-miR-487a	2.43e-05	0.00023796	1.15066	-3.08291	-3.10814	-3.01235	-3.03369	-3.07446	-3.09603	-3.22205	-3.13428	-3.27834	-3.32109	-3.32191	-3.27732	-3.28825	-3.31458	-3.28764	-3.28542
hsa-miR-487b	2.43e-05	0.00023796	1.15066	-3.08291	-3.10814	-3.01235	-3.03369	-3.07446	-3.09603	-3.22205	-3.13428	-3.27834	-3.32109	-3.32191	-3.27732	-3.28825	-3.31458	-3.28764	-3.28542
hsa-miR-488-3p	2.43e-05	0.00023796	1.15066	-3.08291	-3.10814	-3.01235	-3.03369	-3.07446	-3.09603	-3.22205	-3.13428	-3.27834	-3.32109	-3.32191	-3.27732	-3.28825	-3.31458	-3.28764	-3.28542
hsa-miR-488-5p	2.43e-05	0.00023796	1.15066	-3.08291	-3.10814	-3.01235	-3.03369	-3.07446	-3.09603	-3.22205	-3.13428	-3.27834	-3.32109	-3.32191	-3.27732	-3.28825	-3.31458	-3.28764	-3.28542
hsa-miR-489	2.43e-05	0.00023796	1.15066	-3.08291	-3.10814	-3.01235	-3.03369	-3.07446	-3.09603	-3.22205	-3.13428	-3.27834	-3.32109	-3.32191	-3.27732	-3.28825	-3.31458	-3.28764	-3.28542
hsa-miR-490-3p	2.43e-05	0.00023796	1.15066	-3.08291	-3.10814	-3.01235	-3.03369	-3.07446	-3.09603	-3.22205	-3.13428	-3.27834	-3.32109	-3.32191	-3.27732	-3.28825	-3.31458	-3.28764	-3.28542
hsa-miR-490-5p	2.43e-05	0.00023796	1.15066	-3.08291	-3.10814	-3.01235	-3.03369	-3.07446	-3.09603	-3.22205	-3.13428	-3.27834	-3.32109	-3.32191	-3.27732	-3.28825	-3.31458	-3.28764	-3.28542
hsa-miR-491-3p	2.43e-05	0.00023796	1.15066	-3.08291	-3.10814	-3.01235	-3.03369	-3.07446	-3.09603	-3.22205	-3.13428	-3.27834	-3.32109	-3.32191	-3.27732	-3.28825	-3.31458	-3.28764	-3.28542
hsa-miR-491-5p	2.43e-05	0.00023796	1.15066	-3.08291	-3.10814	-3.01235	-3.03369	-3.07446	-3.09603	-3.22205	-3.13428	-3.27834	-3.32109	-3.32191	-3.27732	-3.28825	-3.31458	-3.28764	-3.28542
hsa-miR-492	2.43e-05	0.00023796	1.15066	-3.08291	-3.10814	-3.01235	-3.03369	-3.07446	-3.09603	-3.22205	-3.13428	-3.27834	-3.32109	-3.32191	-3.27732	-3.28825	-3.31458	-3.28764	-3.28542
hsa-miR-493-3p	2.43e-05	0.00023796	1.15066	-3.08291	-3.10814	-3.01235	-3.03369	-3.07446	-3.09603	-3.22205	-3.13428	-3.27834	-3.32109	-3.32191	-3.27732	-3.28825	-3.31458	-3.28764	-3.28542
hsa-miR-493-5p	2.43e-05	0.00023796	1.15066	-3.08291	-3.10814	-3.01235	-3.03369	-3.07446	-3.09603	-3.22205	-3.13428	-3.27834	-3.32109	-3.32191	-3.27732	-3.28825	-3.31458	-3.28764	-3.28542
hsa-miR-494	0.144812	0.200922	0.512859	-3.08291	-3.10814	-3.01235	-3.03369	-3.07446	-3.09603	-3.22205	-3.13428	-0.867033	-1.91786	-2.85805	-1.09583	-3.28825	-3.31458	-3.28764	-3.28542
hsa-miR-495-3p	2.43e-05	0.00023796	1.15066	-3.08291	-3.10814	-3.01235	-3.03369	-3.07446	-3.09603	-3.22205	-3.13428	-3.27834	-3.32109	-3.32191	-3.27732	-3.28825	-3.31458	-3.28764	-3.28542
hsa-miR-495-5p	2.43e-05	0.00023796	1.15066	-3.08291	-3.10814	-3.01235	-3.03369	-3.07446	-3.09603	-3.22205	-3.13428	-3.27834	-3.32109	-3.32191	-3.27732	-3.28825	-3.31458	-3.28764	-3.28542
hsa-miR-496	2.43e-05	0.00023796	1.15066	-3.08291	-3.10814	-3.01235	-3.03369	-3.07446	-3.09603	-3.22205	-3.13428	-3.27834	-3.32109	-3.32191	-3.27732	-3.28825	-3.31458	-3.28764	-3.28542
hsa-miR-497-3p	2.43e-05	0.00023796	1.15066	-3.08291	-3.10814	-3.01235	-3.03369	-3.07446	-3.09603	-3.22205	-3.13428	-3.27834	-3.32109	-3.32191	-3.27732	-3.28825	-3.31458	-3.28764	-3.28542
hsa-miR-497-5p	2.43e-05	0.00023796	1.15066	-3.08291	-3.10814	-3.01235	-3.03369	-3.07446	-3.09603	-3.22205	-3.13428	-3.27834	-3.32109	-3.32191	-3.27732	-3.28825	-3.31458	-3.28764	-3.28542
hsa-miR-498	2.43e-05	0.00023796	1.15066	-3.08291	-3.10814	-3.01235	-3.03369	-3.07446	-3.09603	-3.22205	-3.13428	-3.27834	-3.32109	-3.32191	-3.27732	-3.28825	-3.31458	-3.28764	-3.28542
hsa-miR-4999-3p	2.43e-05	0.00023796	1.15066	-3.08291	-3.10814	-3.01235	-3.03369	-3.07446	-3.09603	-3.22205	-3.13428	-3.27834	-3.32109	-3.32191	-3.27732	-3.28825	-3.31458	-3.28764	-3.28542
hsa-miR-4999-5p	2.43e-05	0.00023796	1.15066	-3.08291	-3.10814	-3.01235	-3.03369	-3.07446	-3.09603	-3.22205	-3.13428	-3.27834	-3.32109	-3.32191	-3.27732	-3.28825	-3.31458	-3.28764	-3.28542
hsa-miR-499a-3p	2.43e-05	0.00023796	1.15066	-3.08291	-3.10814	-3.01235	-3.03369	-3.07446	-3.09603	-3.22205	-3.13428	-3.27834	-3.32109	-3.32191	-3.27732	-3.28825	-3.31458	-3.28764	-3.28542
hsa-miR-499a-5p	2.43e-05	0.00023796	1.15066	-3.08291	-3.10814	-3.01235	-3.03369	-3.07446	-3.09603	-3.22205	-3.13428	-3.27834	-3.32109	-3.32191	-3.27732	-3.28825	-3.31458	-3.28764	-3.28542
hsa-miR-499b-3p	2.43e-05	0.00023796	1.15066	-3.08291	-3.10814	-3.01235	-3.03369	-3.07446	-3.09603	-3.22205	-3.13428	-3.27834	-3.32109	-3.32191	-3.27732	-3.28825	-3.31458	-3.28764	-3.28542
hsa-miR-499b-5p	2.43e-05	0.00023796	1.15066	-3.08291	-3.10814	-3.01235	-3.03369	-3.07446	-3.09603	-3.22205	-3.13428	-3.27834	-3.32109	-3.32191	-3.27732	-3.28825	-3.31458	-3.28764	-3.28542
hsa-miR-5000-3p	2.43e-05	0.00023796	1.15066	-3.08291	-3.10814	-3.01235	-3.03369	-3.07446	-3.09603	-3.22205	-3.13428	-3.27834	-3.32109	-3.32191	-3.27732	-3.28825	-3.31458	-3.28764	-3.28542
hsa-miR-5000-5p	2.43e-05	0.00023796	1.15066	-3.08291	-3.10814	-3.01235	-3.03369	-3.07446	-3.09603	-3.22205	-3.13428	-3.27834	-3.32109	-3.32191	-3.27732	-3.28825	-3.31458	-3.28764	-3.28542
hsa-miR-5001-3p	2.43e-05	0.00023796	1.15066	-3.08291	-3.10814	-3.01235	-3.03369	-3.07446	-3.09603	-3.22205	-3.13428	-3.27834	-3.32109	-3.32191	-3.27732	-3.28825	-3.31458	-3.28764	-3.28542
hsa-miR-5001-5p	0.00215325	0.00566634	0.239013	-3.08291	-3.10814	-3.01235	-3.03369	-3.07446	-3.09603	0.554514	1.05464	2.8269	0.442089	-0.0168114	0.160329	0.333962	1.71325	0.456188	0.442089
hsa-miR-5002-3p	2.43e-05	0.00023796	1.15066	-3.08291	-3.10814	-3.01235	-3.03369	-3.07446	-3.09603	-3.22205	-3.13428	-3.27834	-3.32109	-3.32191	-3.27732	-3.28825	-3.31458	-3.28764	-3.28542
hsa-miR-5002-5p	2.43e-05	0.00023796	1.15066	-3.08291	-3.10814	-3.01235	-3.03369	-3.07446	-3.09603	-3.22205	-3.13428	-3.27834	-3.32109	-3.32191	-3.27732	-3.28825	-3.31458	-3.28764	-3.28542
hsa-miR-5003-3p	2.43e-05	0.00023796	1.15066	-3.08291	-3.10814	-3.01235	-3.03369	-3.07446	-3.09603	-3.22205	-3.13428	-3.27834	-3.32109	-3.32191	-3.27732	-3.28825	-3.31458	-3.28764	-3.28542
hsa-miR-5003-5p	2.43e-05	0.00023796	1.15066	-3.08291	-3.10814	-3.01235	-3.03369	-3.07446	-3.09603	-3.22205	-3.13428	-3.27834	-3.32109	-3.32191	-3.27732	-3.28825	-3.31458	-3.28764	-3.28542
hsa-miR-5004-3p	2.43e-05	0.00023796	1.15066	-3.08291	-3.10814	-3.01235	-3.03369	-3.07446	-3.09603	-3.22205	-3.13428	-3.27834	-3.32109	-3.32191	-3.27732	-3.28825	-3.31458	-3.28764	-3.28542
hsa-miR-5004-5p	2.43e-05	0.00023796	1.15066	-3.08291	-3.10814	-3.01235	-3.03369	-3.07446	-3.09603	-3.22205	-3.13428	-3.27834	-3.32109	-3.32191	-3.27732	-3.28825	-3.31458	-3.28764	-3.28542
hsa-miR-5006-3p	2.43e-05	0.00023796	1.15066	-3.08291	-3.10814	-3.01235	-3.03369	-3.07446	-3.09603	-3.22205	-3.13428	-3.27834	-3.32109	-3.32191	-3.27732	-3.28825	-3.31458	-3.28764	-3.28542
hsa-miR-5006-5p	0.023362	0.0285596	0.318103	-3.08291	-3.10814	-3.01235	-3.03369	-3.07446	-3.09603	-3.22205	-3.13428	-3.27834	-0.883827	-1.00494	-3.27732	-1.61201	-0.559837	-3.28764	-0.760021
hsa-miR-5007-3p	2.43e-05	0.00023796	1.15066	-3.08291	-3.10814	-3.01235	-3.03369	-3.07446	-3.09603	-3.22205	-3.13428	-3.27834	-3.32109	-3.32191	-3.27732	-3.28825	-3.31458	-3.28764	-3.28542
hsa-miR-5007-5p	2.43e-05	0.00023796	1.15066	-3.08291	-3.10814	-3.01235	-3.03369	-3.07446	-3.09603	-3.22205	-3.13428	-3.27834	-3.32109	-3.32191	-3.27732	-3.28825	-3.31458	-3.28764	-3.28542
hsa-miR-5008-3p	2.43e-05	0.00023796	1.15066	-3.08291	-3.10814	-3.01235	-3.03369	-3.07446	-3.09603	-3.22205	-3.13428	-3.27834	-3.32109	-3.32191	-3.27732	-3.28825	-3.31458	-3.28764	-3.28542
hsa-miR-5008-5p	2.43e-05	0.00023796	1.15066	-3.08291	-3.10814	-3.01235	-3.03369	-3.07446	-3.09603	-3.22205	-3.13428	-3.27834	-3.32109	-3.32191	-3.27732	-3.28825	-3.31458	-3.28764	-3.28542
hsa-miR-5009-3p	2.43e-05	0.00023796	1.15066	-3.08291	-3.10814	-3.01235	-3.03369	-3.07446	-3.09603	-3.22205	-3.13428	-3.27834	-3.32109	-3.32191	-3.27732	-3.28825	-3.31458	-3.28764	-3.28542
hsa-miR-5009-5p	2.43e-05	0.00023796	1.15066	-3.08291	-3.10814	-3.01235	-3.03369	-3.07446	-3.09603	-3.22205	-3.13428	-3.27834	-3.32109	-3.32191	-3.27732	-3.28825	-3.31458	-3.28764	-3.28542
hsa-miR-500a-3p	2.43e-05	0.00023796	1.15066	-3.08291	-3.10814	-3.01235	-3.03369	-3.07446	-3.09603	-3.22205	-3.13428	-3.27834	-3.32109	-3.32191	-3.27732	-3.28825	-3.31458	-3.28764	-3.28542
hsa-miR-500a-5p	2.43e-05	0.00023796	1.15066	-3.08291	-3.10814	-3.01235	-3.03369	-3.07446	-3.09603	-3.22205	-3.13428	-3.27834	-3.32109	-3.32191	-3.27732	-3.28825	-3.31458	-3.28764	-3.28542
hsa-miR-500b	2.43e-05	0.00023796	1.15066	-3.08291	-3.10814	-3.01235	-3.03369	-3.07446	-3.09603	-3.22205	-3.13428	-3.27834	-3.32109	-3.32191	-3.27732	-3.28825	-3.31458	-3.28764	-3.28542
hsa-miR-501-3p	2.43e-05	0.00023796	1.15066	-3.08291	-3.10814	-3.01235	-3.03369	-3.07446	-3.09603	-3.22205	-3.13428	-3.27834	-3.32109	-3.32191	-3.27732	-3.28825	-3.31458	-3.28764	-3.28542
hsa-miR-501-5p	2.43e-05	0.00023796	1.15066	-3.08291	-3.10814	-3.01235	-3.03369	-3.07446	-3.09603	-3.22205	-3.13428	-3.27834	-3.32109	-3.32191	-3.27732	-3.28825	-3.31458	-3.28764	-3.28542
hsa-miR-5010-3p	2.43e-05	0.00023796	1.15066	-3.08291	-3.10814	-3.01235	-3.03369	-3.07446	-3.09603	-3.22205	-3.13428	-3.27834	-3.32109	-3.32191	-3.27732	-3.28825	-3.31458	-3.28764	-3.28542
hsa-miR-5010-5p	0.353074	0.423245	1.05287	-3.08291	-3.10814	-3.01235	-3.03369	-3.07446	-3.09603	-3.22205	-3.13428	-3.27834	-3.32109	-3.32191	-3.27732	-3.28825	-2.50534	-3.28764	-3.28542
hsa-miR-5011-3p	2.43e-05	0.00023796	1.15066	-3.08291	-3.10814	-3.01235	-3.03369	-3.07446	-3.09603	-3.22205	-3.13428	-3.27834	-3.32109	-3.32191	-3.27732	-3.28825	-3.31458	-3.28764	-3.28542
hsa-miR-5011-5p	2.43e-05	0.00023796	1.15066	-3.08291	-3.10814	-3.01235	-3.03369	-3.07446	-3.09603	-3.22205	-3.13428	-3.27834	-3.32109	-3.32191	-3.27732	-3.28825	-3.31458	-3.28764	-3.28542
hsa-miR-502-3p	2.43e-05	0.00023796	1.15066	-3.08291	-3.10814	-3.01235	-3.03369	-3.07446	-3.09603	-3.22205	-3.13428	-3.27834	-3.32109	-3.32191	-3.27732	-3.28825	-3.31458	-3.28764	-3.28542
hsa-miR-502-5p	2.43e-05	0.00023796	1.15066	-3.08291	-3.10814	-3.01235	-3.03369	-3.07446	-3.09603	-3.22205	-3.13428	-3.27834	-3.32109	-3.32191	-3.27732	-3.28825	-3.31458	-3.28764	-3.28542
hsa-miR-503-3p	2.43e-05	0.00023796	1.15066	-3.08291	-3.10814	-3.01235	-3.03369	-3.07446	-3.09603	-3.22205	-3.13428	-3.27834	-3.32109	-3.32191	-3.27732	-3.28825	-3.31458	-3.28764	-3.28542
hsa-miR-503-5p	2.43e-05	0.00023796	1.15066	-3.08291	-3.10814	-3.01235	-3.03369	-3.07446	-3.09603	-3.22205	-3.13428	-3.27834	-3.32109	-3.32191	-3.27732	-3.28825	-3.31458	-3.28764	-3.28542
hsa-miR-504	2.43e-05	0.00023796	1.15066	-3.08291	-3.10814	-3.01235	-3.03369	-3.07446	-3.09603	-3.22205	-3.13428	-3.27834	-3.32109	-3.32191	-3.27732	-3.28825	-3.31458	-3.28764	-3.28542
hsa-miR-5047	2.43e-05	0.00023796	1.15066	-3.08291	-3.10814	-3.01235	-3.03369	-3.07446	-3.09603	-3.22205	-3.13428	-3.27834	-3.32109	-3.32191	-3.27732	-3.28825	-3.31458	-3.28764	-3.28542
hsa-miR-505-3p	2.43e-05	0.00023796	1.15066	-3.08291	-3.10814	-3.01235	-3.03369	-3.07446	-3.09603	-3.22205	-3.13428	-3.27834	-3.32109	-3.32191	-3.27732	-3.28825	-3.31458	-3.28764	-3.28542
hsa-miR-505-5p	2.43e-05	0.00023796	1.15066	-3.08291	-3.10814	-3.01235	-3.03369	-3.07446	-3.09603	-3.22205	-3.13428	-3.27834	-3.32109	-3.32191	-3.27732	-3.28825	-3.31458	-3.28764	-3.28542
hsa-miR-506-3p	2.43e-05	0.00023796	1.15066	-3.08291	-3.10814	-3.01235	-3.03369	-3.07446	-3.09603	-3.22205	-3.13428	-3.27834	-3.32109	-3.32191	-3.27732	-3.28825	-3.31458	-3.28764	-3.28542
hsa-miR-506-5p	2.43e-05	0.00023796	1.15066	-3.08291	-3.10814	-3.01235	-3.03369	-3.07446	-3.09603	-3.22205	-3.13428	-3.27834	-3.32109	-3.32191	-3.27732	-3.28825	-3.31458	-3.28764	-3.28542
hsa-miR-507	2.43e-05	0.00023796	1.15066	-3.08291	-3.10814	-3.01235	-3.03369	-3.07446	-3.09603	-3.22205	-3.13428	-3.27834	-3.32109	-3.32191	-3.27732	-3.28825	-3.31458	-3.28764	-3.28542
hsa-miR-508-3p	2.43e-05	0.00023796	1.15066	-3.08291	-3.10814	-3.01235	-3.03369	-3.07446	-3.09603	-3.22205	-3.13428	-3.27834	-3.32109	-3.32191	-3.27732	-3.28825	-3.31458	-3.28764	-3.28542
hsa-miR-508-5p	2.43e-05	0.00023796	1.15066	-3.08291	-3.10814	-3.01235	-3.03369	-3.07446	-3.09603	-3.22205	-3.13428	-3.27834	-3.32109	-3.32191	-3.27732	-3.28825	-3.31458	-3.28764	-3.28542
hsa-miR-5087	2.43e-05	0.00023796	1.15066	-3.08291	-3.10814	-3.01235	-3.03369	-3.07446	-3.09603	-3.22205	-3.13428	-3.27834	-3.32109	-3.32191	-3.27732	-3.28825	-3.31458	-3.28764	-3.28542
hsa-miR-5088	2.43e-05	0.00023796	1.15066	-3.08291	-3.10814	-3.01235	-3.03369	-3.07446	-3.09603	-3.22205	-3.13428	-3.27834	-3.32109	-3.32191	-3.27732	-3.28825	-3.31458	-3.28764	-3.28542
hsa-miR-5089-3p	2.43e-05	0.00023796	1.15066	-3.08291	-3.10814	-3.01235	-3.03369	-3.07446	-3.09603	-3.22205	-3.13428	-3.27834	-3.32109	-3.32191	-3.27732	-3.28825	-3.31458	-3.28764	-3.28542
hsa-miR-5089-5p	2.43e-05	0.00023796	1.15066	-3.08291	-3.10814	-3.01235	-3.03369	-3.07446	-3.09603	-3.22205	-3.13428	-3.27834	-3.32109	-3.32191	-3.27732	-3.28825	-3.31458	-3.28764	-3.28542
hsa-miR-509-3-5p	2.43e-05	0.00023796	1.15066	-3.08291	-3.10814	-3.01235	-3.03369	-3.07446	-3.09603	-3.22205	-3.13428	-3.27834	-3.32109	-3.32191	-3.27732	-3.28825	-3.31458	-3.28764	-3.28542
hsa-miR-509-3p	2.43e-05	0.00023796	1.15066	-3.08291	-3.10814	-3.01235	-3.03369	-3.07446	-3.09603	-3.22205	-3.13428	-3.27834	-3.32109	-3.32191	-3.27732	-3.28825	-3.31458	-3.28764	-3.28542
hsa-miR-509-5p	2.43e-05	0.00023796	1.15066	-3.08291	-3.10814	-3.01235	-3.03369	-3.07446	-3.09603	-3.22205	-3.13428	-3.27834	-3.32109	-3.32191	-3.27732	-3.28825	-3.31458	-3.28764	-3.28542
hsa-miR-5090	2.43e-05	0.00023796	1.15066	-3.08291	-3.10814	-3.01235	-3.03369	-3.07446	-3.09603	-3.22205	-3.13428	-3.27834	-3.32109	-3.32191	-3.27732	-3.28825	-3.31458	-3.28764	-3.28542
hsa-miR-5091	2.43e-05	0.00023796	1.15066	-3.08291	-3.10814	-3.01235	-3.03369	-3.07446	-3.09603	-3.22205	-3.13428	-3.27834	-3.32109	-3.32191	-3.27732	-3.28825	-3.31458	-3.28764	-3.28542
hsa-miR-5092	2.43e-05	0.00023796	1.15066	-3.08291	-3.10814	-3.01235	-3.03369	-3.07446	-3.09603	-3.22205	-3.13428	-3.27834	-3.32109	-3.32191	-3.27732	-3.28825	-3.31458	-3.28764	-3.28542
hsa-miR-5093	2.43e-05	0.00023796	1.15066	-3.08291	-3.10814	-3.01235	-3.03369	-3.07446	-3.09603	-3.22205	-3.13428	-3.27834	-3.32109	-3.32191	-3.27732	-3.28825	-3.31458	-3.28764	-3.28542
hsa-miR-5094	2.43e-05	0.00023796	1.15066	-3.08291	-3.10814	-3.01235	-3.03369	-3.07446	-3.09603	-3.22205	-3.13428	-3.27834	-3.32109	-3.32191	-3.27732	-3.28825	-3.31458	-3.28764	-3.28542
hsa-miR-5095	2.43e-05	0.00023796	1.15066	-3.08291	-3.10814	-3.01235	-3.03369	-3.07446	-3.09603	-3.22205	-3.13428	-3.27834	-3.32109	-3.32191	-3.27732	-3.28825	-3.31458	-3.28764	-3.28542
hsa-miR-5096	0.263716	0.29546	1.06431	-3.08291	-3.10814	-3.01235	-3.03369	-3.07446	-3.09603	-3.22205	-3.13428	-3.27834	-3.32109	-3.32191	-3.27732	-3.28825	-2.58589	-3.28764	-3.28542
hsa-miR-510	2.43e-05	0.00023796	1.15066	-3.08291	-3.10814	-3.01235	-3.03369	-3.07446	-3.09603	-3.22205	-3.13428	-3.27834	-3.32109	-3.32191	-3.27732	-3.28825	-3.31458	-3.28764	-3.28542
hsa-miR-5100	0.000262153	0.00152771	0.162499	-3.08291	-3.10814	-3.01235	-3.03369	-3.07446	-3.09603	2.14251	-3.13428	1.68692	1.69706	1.36687	3.14937	-0.481298	0.204696	3.20967	1.69706
hsa-miR-511	2.43e-05	0.00023796	1.15066	-3.08291	-3.10814	-3.01235	-3.03369	-3.07446	-3.09603	-3.22205	-3.13428	-3.27834	-3.32109	-3.32191	-3.27732	-3.28825	-3.31458	-3.28764	-3.28542
hsa-miR-512-3p	2.43e-05	0.00023796	1.15066	-3.08291	-3.10814	-3.01235	-3.03369	-3.07446	-3.09603	-3.22205	-3.13428	-3.27834	-3.32109	-3.32191	-3.27732	-3.28825	-3.31458	-3.28764	-3.28542
hsa-miR-512-5p	2.43e-05	0.00023796	1.15066	-3.08291	-3.10814	-3.01235	-3.03369	-3.07446	-3.09603	-3.22205	-3.13428	-3.27834	-3.32109	-3.32191	-3.27732	-3.28825	-3.31458	-3.28764	-3.28542
hsa-miR-513a-3p	2.43e-05	0.00023796	1.15066	-3.08291	-3.10814	-3.01235	-3.03369	-3.07446	-3.09603	-3.22205	-3.13428	-3.27834	-3.32109	-3.32191	-3.27732	-3.28825	-3.31458	-3.28764	-3.28542
hsa-miR-513a-5p	2.43e-05	0.00023796	1.15066	-3.08291	-3.10814	-3.01235	-3.03369	-3.07446	-3.09603	-3.22205	-3.13428	-3.27834	-3.32109	-3.32191	-3.27732	-3.28825	-3.31458	-3.28764	-3.28542
hsa-miR-513b	2.43e-05	0.00023796	1.15066	-3.08291	-3.10814	-3.01235	-3.03369	-3.07446	-3.09603	-3.22205	-3.13428	-3.27834	-3.32109	-3.32191	-3.27732	-3.28825	-3.31458	-3.28764	-3.28542
hsa-miR-513c-3p	2.43e-05	0.00023796	1.15066	-3.08291	-3.10814	-3.01235	-3.03369	-3.07446	-3.09603	-3.22205	-3.13428	-3.27834	-3.32109	-3.32191	-3.27732	-3.28825	-3.31458	-3.28764	-3.28542
hsa-miR-513c-5p	2.43e-05	0.00023796	1.15066	-3.08291	-3.10814	-3.01235	-3.03369	-3.07446	-3.09603	-3.22205	-3.13428	-3.27834	-3.32109	-3.32191	-3.27732	-3.28825	-3.31458	-3.28764	-3.28542
hsa-miR-514a-3p	2.43e-05	0.00023796	1.15066	-3.08291	-3.10814	-3.01235	-3.03369	-3.07446	-3.09603	-3.22205	-3.13428	-3.27834	-3.32109	-3.32191	-3.27732	-3.28825	-3.31458	-3.28764	-3.28542
hsa-miR-514a-5p	2.43e-05	0.00023796	1.15066	-3.08291	-3.10814	-3.01235	-3.03369	-3.07446	-3.09603	-3.22205	-3.13428	-3.27834	-3.32109	-3.32191	-3.27732	-3.28825	-3.31458	-3.28764	-3.28542
hsa-miR-514b-3p	2.43e-05	0.00023796	1.15066	-3.08291	-3.10814	-3.01235	-3.03369	-3.07446	-3.09603	-3.22205	-3.13428	-3.27834	-3.32109	-3.32191	-3.27732	-3.28825	-3.31458	-3.28764	-3.28542
hsa-miR-514b-5p	0.351557	0.475661	0.571223	-3.08291	-3.10814	-3.01235	-3.03369	-3.07446	-3.09603	-3.22205	-3.13428	-3.27834	-3.32109	-3.32191	-3.27732	-0.801346	-1.13646	-3.28764	-3.28542
hsa-miR-515-3p	2.43e-05	0.00023796	1.15066	-3.08291	-3.10814	-3.01235	-3.03369	-3.07446	-3.09603	-3.22205	-3.13428	-3.27834	-3.32109	-3.32191	-3.27732	-3.28825	-3.31458	-3.28764	-3.28542
hsa-miR-515-5p	2.43e-05	0.00023796	1.15066	-3.08291	-3.10814	-3.01235	-3.03369	-3.07446	-3.09603	-3.22205	-3.13428	-3.27834	-3.32109	-3.32191	-3.27732	-3.28825	-3.31458	-3.28764	-3.28542
hsa-miR-516a-3p	2.43e-05	0.00023796	1.15066	-3.08291	-3.10814	-3.01235	-3.03369	-3.07446	-3.09603	-3.22205	-3.13428	-3.27834	-3.32109	-3.32191	-3.27732	-3.28825	-3.31458	-3.28764	-3.28542
hsa-miR-516a-5p	2.43e-05	0.00023796	1.15066	-3.08291	-3.10814	-3.01235	-3.03369	-3.07446	-3.09603	-3.22205	-3.13428	-3.27834	-3.32109	-3.32191	-3.27732	-3.28825	-3.31458	-3.28764	-3.28542
hsa-miR-516b-5p	2.43e-05	0.00023796	1.15066	-3.08291	-3.10814	-3.01235	-3.03369	-3.07446	-3.09603	-3.22205	-3.13428	-3.27834	-3.32109	-3.32191	-3.27732	-3.28825	-3.31458	-3.28764	-3.28542
hsa-miR-517-5p	2.43e-05	0.00023796	1.15066	-3.08291	-3.10814	-3.01235	-3.03369	-3.07446	-3.09603	-3.22205	-3.13428	-3.27834	-3.32109	-3.32191	-3.27732	-3.28825	-3.31458	-3.28764	-3.28542
hsa-miR-517a-3p	2.43e-05	0.00023796	1.15066	-3.08291	-3.10814	-3.01235	-3.03369	-3.07446	-3.09603	-3.22205	-3.13428	-3.27834	-3.32109	-3.32191	-3.27732	-3.28825	-3.31458	-3.28764	-3.28542
hsa-miR-517c-3p	2.43e-05	0.00023796	1.15066	-3.08291	-3.10814	-3.01235	-3.03369	-3.07446	-3.09603	-3.22205	-3.13428	-3.27834	-3.32109	-3.32191	-3.27732	-3.28825	-3.31458	-3.28764	-3.28542
hsa-miR-5186	2.43e-05	0.00023796	1.15066	-3.08291	-3.10814	-3.01235	-3.03369	-3.07446	-3.09603	-3.22205	-3.13428	-3.27834	-3.32109	-3.32191	-3.27732	-3.28825	-3.31458	-3.28764	-3.28542
hsa-miR-5187-3p	2.43e-05	0.00023796	1.15066	-3.08291	-3.10814	-3.01235	-3.03369	-3.07446	-3.09603	-3.22205	-3.13428	-3.27834	-3.32109	-3.32191	-3.27732	-3.28825	-3.31458	-3.28764	-3.28542
hsa-miR-5187-5p	2.43e-05	0.00023796	1.15066	-3.08291	-3.10814	-3.01235	-3.03369	-3.07446	-3.09603	-3.22205	-3.13428	-3.27834	-3.32109	-3.32191	-3.27732	-3.28825	-3.31458	-3.28764	-3.28542
hsa-miR-5188	0.45553	0.566008	1.03924	-3.08291	-3.10814	-3.01235	-3.03369	-3.07446	-3.09603	-3.22205	-3.13428	-3.27834	-3.32109	-3.32191	-3.27732	-3.28825	-2.41278	-3.28764	-3.28542
hsa-miR-5189	2.43e-05	0.00023796	1.15066	-3.08291	-3.10814	-3.01235	-3.03369	-3.07446	-3.09603	-3.22205	-3.13428	-3.27834	-3.32109	-3.32191	-3.27732	-3.28825	-3.31458	-3.28764	-3.28542
hsa-miR-518a-3p	2.43e-05	0.00023796	1.15066	-3.08291	-3.10814	-3.01235	-3.03369	-3.07446	-3.09603	-3.22205	-3.13428	-3.27834	-3.32109	-3.32191	-3.27732	-3.28825	-3.31458	-3.28764	-3.28542
hsa-miR-518a-5p	2.43e-05	0.00023796	1.15066	-3.08291	-3.10814	-3.01235	-3.03369	-3.07446	-3.09603	-3.22205	-3.13428	-3.27834	-3.32109	-3.32191	-3.27732	-3.28825	-3.31458	-3.28764	-3.28542
hsa-miR-518b	2.43e-05	0.00023796	1.15066	-3.08291	-3.10814	-3.01235	-3.03369	-3.07446	-3.09603	-3.22205	-3.13428	-3.27834	-3.32109	-3.32191	-3.27732	-3.28825	-3.31458	-3.28764	-3.28542
hsa-miR-518c-3p	2.43e-05	0.00023796	1.15066	-3.08291	-3.10814	-3.01235	-3.03369	-3.07446	-3.09603	-3.22205	-3.13428	-3.27834	-3.32109	-3.32191	-3.27732	-3.28825	-3.31458	-3.28764	-3.28542
hsa-miR-518c-5p	2.43e-05	0.00023796	1.15066	-3.08291	-3.10814	-3.01235	-3.03369	-3.07446	-3.09603	-3.22205	-3.13428	-3.27834	-3.32109	-3.32191	-3.27732	-3.28825	-3.31458	-3.28764	-3.28542
hsa-miR-518d-3p	2.43e-05	0.00023796	1.15066	-3.08291	-3.10814	-3.01235	-3.03369	-3.07446	-3.09603	-3.22205	-3.13428	-3.27834	-3.32109	-3.32191	-3.27732	-3.28825	-3.31458	-3.28764	-3.28542
hsa-miR-518e-3p	2.43e-05	0.00023796	1.15066	-3.08291	-3.10814	-3.01235	-3.03369	-3.07446	-3.09603	-3.22205	-3.13428	-3.27834	-3.32109	-3.32191	-3.27732	-3.28825	-3.31458	-3.28764	-3.28542
hsa-miR-518e-5p	2.43e-05	0.00023796	1.15066	-3.08291	-3.10814	-3.01235	-3.03369	-3.07446	-3.09603	-3.22205	-3.13428	-3.27834	-3.32109	-3.32191	-3.27732	-3.28825	-3.31458	-3.28764	-3.28542
hsa-miR-518f-3p	2.43e-05	0.00023796	1.15066	-3.08291	-3.10814	-3.01235	-3.03369	-3.07446	-3.09603	-3.22205	-3.13428	-3.27834	-3.32109	-3.32191	-3.27732	-3.28825	-3.31458	-3.28764	-3.28542
hsa-miR-518f-5p	2.43e-05	0.00023796	1.15066	-3.08291	-3.10814	-3.01235	-3.03369	-3.07446	-3.09603	-3.22205	-3.13428	-3.27834	-3.32109	-3.32191	-3.27732	-3.28825	-3.31458	-3.28764	-3.28542
hsa-miR-5190	2.43e-05	0.00023796	1.15066	-3.08291	-3.10814	-3.01235	-3.03369	-3.07446	-3.09603	-3.22205	-3.13428	-3.27834	-3.32109	-3.32191	-3.27732	-3.28825	-3.31458	-3.28764	-3.28542
hsa-miR-5191	2.43e-05	0.00023796	1.15066	-3.08291	-3.10814	-3.01235	-3.03369	-3.07446	-3.09603	-3.22205	-3.13428	-3.27834	-3.32109	-3.32191	-3.27732	-3.28825	-3.31458	-3.28764	-3.28542
hsa-miR-5192	2.43e-05	0.00023796	1.15066	-3.08291	-3.10814	-3.01235	-3.03369	-3.07446	-3.09603	-3.22205	-3.13428	-3.27834	-3.32109	-3.32191	-3.27732	-3.28825	-3.31458	-3.28764	-3.28542
hsa-miR-5193	2.43e-05	0.00023796	1.15066	-3.08291	-3.10814	-3.01235	-3.03369	-3.07446	-3.09603	-3.22205	-3.13428	-3.27834	-3.32109	-3.32191	-3.27732	-3.28825	-3.31458	-3.28764	-3.28542
hsa-miR-5194	2.43e-05	0.00023796	1.15066	-3.08291	-3.10814	-3.01235	-3.03369	-3.07446	-3.09603	-3.22205	-3.13428	-3.27834	-3.32109	-3.32191	-3.27732	-3.28825	-3.31458	-3.28764	-3.28542
hsa-miR-5195-3p	0.0785225	0.0848607	0.468741	-3.08291	-3.10814	-3.01235	-3.03369	-3.07446	-3.09603	0.241488	-3.13428	-3.27834	-2.40044	-1.68526	-3.27732	-0.121499	-0.536773	-0.0168114	-0.0168114
hsa-miR-5195-5p	2.43e-05	0.00023796	1.15066	-3.08291	-3.10814	-3.01235	-3.03369	-3.07446	-3.09603	-3.22205	-3.13428	-3.27834	-3.32109	-3.32191	-3.27732	-3.28825	-3.31458	-3.28764	-3.28542
hsa-miR-5196-3p	2.43e-05	0.00023796	1.15066	-3.08291	-3.10814	-3.01235	-3.03369	-3.07446	-3.09603	-3.22205	-3.13428	-3.27834	-3.32109	-3.32191	-3.27732	-3.28825	-3.31458	-3.28764	-3.28542
hsa-miR-5196-5p	0.155585	0.109423	0.469621	-3.08291	-3.10814	-3.01235	-3.03369	-3.07446	-3.09603	-3.22205	-3.13428	-3.27834	-3.32109	-2.4158	-3.27732	-0.183868	-2.3676	-3.28764	-1.62353
hsa-miR-5197-3p	2.43e-05	0.00023796	1.15066	-3.08291	-3.10814	-3.01235	-3.03369	-3.07446	-3.09603	-3.22205	-3.13428	-3.27834	-3.32109	-3.32191	-3.27732	-3.28825	-3.31458	-3.28764	-3.28542
hsa-miR-5197-5p	2.43e-05	0.00023796	1.15066	-3.08291	-3.10814	-3.01235	-3.03369	-3.07446	-3.09603	-3.22205	-3.13428	-3.27834	-3.32109	-3.32191	-3.27732	-3.28825	-3.31458	-3.28764	-3.28542
hsa-miR-519b-3p	2.43e-05	0.00023796	1.15066	-3.08291	-3.10814	-3.01235	-3.03369	-3.07446	-3.09603	-3.22205	-3.13428	-3.27834	-3.32109	-3.32191	-3.27732	-3.28825	-3.31458	-3.28764	-3.28542
hsa-miR-519c-3p	2.43e-05	0.00023796	1.15066	-3.08291	-3.10814	-3.01235	-3.03369	-3.07446	-3.09603	-3.22205	-3.13428	-3.27834	-3.32109	-3.32191	-3.27732	-3.28825	-3.31458	-3.28764	-3.28542
hsa-miR-519d	2.43e-05	0.00023796	1.15066	-3.08291	-3.10814	-3.01235	-3.03369	-3.07446	-3.09603	-3.22205	-3.13428	-3.27834	-3.32109	-3.32191	-3.27732	-3.28825	-3.31458	-3.28764	-3.28542
hsa-miR-519e-3p	2.43e-05	0.00023796	1.15066	-3.08291	-3.10814	-3.01235	-3.03369	-3.07446	-3.09603	-3.22205	-3.13428	-3.27834	-3.32109	-3.32191	-3.27732	-3.28825	-3.31458	-3.28764	-3.28542
hsa-miR-519e-5p	2.43e-05	0.00023796	1.15066	-3.08291	-3.10814	-3.01235	-3.03369	-3.07446	-3.09603	-3.22205	-3.13428	-3.27834	-3.32109	-3.32191	-3.27732	-3.28825	-3.31458	-3.28764	-3.28542
hsa-miR-520a-3p	2.43e-05	0.00023796	1.15066	-3.08291	-3.10814	-3.01235	-3.03369	-3.07446	-3.09603	-3.22205	-3.13428	-3.27834	-3.32109	-3.32191	-3.27732	-3.28825	-3.31458	-3.28764	-3.28542
hsa-miR-520a-5p	2.43e-05	0.00023796	1.15066	-3.08291	-3.10814	-3.01235	-3.03369	-3.07446	-3.09603	-3.22205	-3.13428	-3.27834	-3.32109	-3.32191	-3.27732	-3.28825	-3.31458	-3.28764	-3.28542
hsa-miR-520b	2.43e-05	0.00023796	1.15066	-3.08291	-3.10814	-3.01235	-3.03369	-3.07446	-3.09603	-3.22205	-3.13428	-3.27834	-3.32109	-3.32191	-3.27732	-3.28825	-3.31458	-3.28764	-3.28542
hsa-miR-520c-3p	2.43e-05	0.00023796	1.15066	-3.08291	-3.10814	-3.01235	-3.03369	-3.07446	-3.09603	-3.22205	-3.13428	-3.27834	-3.32109	-3.32191	-3.27732	-3.28825	-3.31458	-3.28764	-3.28542
hsa-miR-520d-3p	2.43e-05	0.00023796	1.15066	-3.08291	-3.10814	-3.01235	-3.03369	-3.07446	-3.09603	-3.22205	-3.13428	-3.27834	-3.32109	-3.32191	-3.27732	-3.28825	-3.31458	-3.28764	-3.28542
hsa-miR-520e	2.43e-05	0.00023796	1.15066	-3.08291	-3.10814	-3.01235	-3.03369	-3.07446	-3.09603	-3.22205	-3.13428	-3.27834	-3.32109	-3.32191	-3.27732	-3.28825	-3.31458	-3.28764	-3.28542
hsa-miR-520f	2.43e-05	0.00023796	1.15066	-3.08291	-3.10814	-3.01235	-3.03369	-3.07446	-3.09603	-3.22205	-3.13428	-3.27834	-3.32109	-3.32191	-3.27732	-3.28825	-3.31458	-3.28764	-3.28542
hsa-miR-520g	2.43e-05	0.00023796	1.15066	-3.08291	-3.10814	-3.01235	-3.03369	-3.07446	-3.09603	-3.22205	-3.13428	-3.27834	-3.32109	-3.32191	-3.27732	-3.28825	-3.31458	-3.28764	-3.28542
hsa-miR-520h	2.43e-05	0.00023796	1.15066	-3.08291	-3.10814	-3.01235	-3.03369	-3.07446	-3.09603	-3.22205	-3.13428	-3.27834	-3.32109	-3.32191	-3.27732	-3.28825	-3.31458	-3.28764	-3.28542
hsa-miR-521	2.43e-05	0.00023796	1.15066	-3.08291	-3.10814	-3.01235	-3.03369	-3.07446	-3.09603	-3.22205	-3.13428	-3.27834	-3.32109	-3.32191	-3.27732	-3.28825	-3.31458	-3.28764	-3.28542
hsa-miR-522-3p	2.43e-05	0.00023796	1.15066	-3.08291	-3.10814	-3.01235	-3.03369	-3.07446	-3.09603	-3.22205	-3.13428	-3.27834	-3.32109	-3.32191	-3.27732	-3.28825	-3.31458	-3.28764	-3.28542
hsa-miR-523-3p	2.43e-05	0.00023796	1.15066	-3.08291	-3.10814	-3.01235	-3.03369	-3.07446	-3.09603	-3.22205	-3.13428	-3.27834	-3.32109	-3.32191	-3.27732	-3.28825	-3.31458	-3.28764	-3.28542
hsa-miR-524-3p	2.43e-05	0.00023796	1.15066	-3.08291	-3.10814	-3.01235	-3.03369	-3.07446	-3.09603	-3.22205	-3.13428	-3.27834	-3.32109	-3.32191	-3.27732	-3.28825	-3.31458	-3.28764	-3.28542
hsa-miR-525-3p	2.43e-05	0.00023796	1.15066	-3.08291	-3.10814	-3.01235	-3.03369	-3.07446	-3.09603	-3.22205	-3.13428	-3.27834	-3.32109	-3.32191	-3.27732	-3.28825	-3.31458	-3.28764	-3.28542
hsa-miR-525-5p	2.43e-05	0.00023796	1.15066	-3.08291	-3.10814	-3.01235	-3.03369	-3.07446	-3.09603	-3.22205	-3.13428	-3.27834	-3.32109	-3.32191	-3.27732	-3.28825	-3.31458	-3.28764	-3.28542
hsa-miR-526b-3p	2.43e-05	0.00023796	1.15066	-3.08291	-3.10814	-3.01235	-3.03369	-3.07446	-3.09603	-3.22205	-3.13428	-3.27834	-3.32109	-3.32191	-3.27732	-3.28825	-3.31458	-3.28764	-3.28542
hsa-miR-526b-5p	0.407438	0.475661	0.672357	-3.08291	-3.10814	-3.01235	-3.03369	-3.07446	-3.09603	-3.22205	-3.13428	-3.27834	-3.32109	-3.32191	-3.27732	-1.13646	-1.61201	-3.28764	-3.28542
hsa-miR-532-3p	2.43e-05	0.00023796	1.15066	-3.08291	-3.10814	-3.01235	-3.03369	-3.07446	-3.09603	-3.22205	-3.13428	-3.27834	-3.32109	-3.32191	-3.27732	-3.28825	-3.31458	-3.28764	-3.28542
hsa-miR-532-5p	2.43e-05	0.00023796	1.15066	-3.08291	-3.10814	-3.01235	-3.03369	-3.07446	-3.09603	-3.22205	-3.13428	-3.27834	-3.32109	-3.32191	-3.27732	-3.28825	-3.31458	-3.28764	-3.28542
hsa-miR-539-3p	2.43e-05	0.00023796	1.15066	-3.08291	-3.10814	-3.01235	-3.03369	-3.07446	-3.09603	-3.22205	-3.13428	-3.27834	-3.32109	-3.32191	-3.27732	-3.28825	-3.31458	-3.28764	-3.28542
hsa-miR-539-5p	2.43e-05	0.00023796	1.15066	-3.08291	-3.10814	-3.01235	-3.03369	-3.07446	-3.09603	-3.22205	-3.13428	-3.27834	-3.32109	-3.32191	-3.27732	-3.28825	-3.31458	-3.28764	-3.28542
hsa-miR-541-3p	2.43e-05	0.00023796	1.15066	-3.08291	-3.10814	-3.01235	-3.03369	-3.07446	-3.09603	-3.22205	-3.13428	-3.27834	-3.32109	-3.32191	-3.27732	-3.28825	-3.31458	-3.28764	-3.28542
hsa-miR-541-5p	2.43e-05	0.00023796	1.15066	-3.08291	-3.10814	-3.01235	-3.03369	-3.07446	-3.09603	-3.22205	-3.13428	-3.27834	-3.32109	-3.32191	-3.27732	-3.28825	-3.31458	-3.28764	-3.28542
hsa-miR-542-3p	2.43e-05	0.00023796	1.15066	-3.08291	-3.10814	-3.01235	-3.03369	-3.07446	-3.09603	-3.22205	-3.13428	-3.27834	-3.32109	-3.32191	-3.27732	-3.28825	-3.31458	-3.28764	-3.28542
hsa-miR-542-5p	2.43e-05	0.00023796	1.15066	-3.08291	-3.10814	-3.01235	-3.03369	-3.07446	-3.09603	-3.22205	-3.13428	-3.27834	-3.32109	-3.32191	-3.27732	-3.28825	-3.31458	-3.28764	-3.28542
hsa-miR-543	2.43e-05	0.00023796	1.15066	-3.08291	-3.10814	-3.01235	-3.03369	-3.07446	-3.09603	-3.22205	-3.13428	-3.27834	-3.32109	-3.32191	-3.27732	-3.28825	-3.31458	-3.28764	-3.28542
hsa-miR-544a	2.43e-05	0.00023796	1.15066	-3.08291	-3.10814	-3.01235	-3.03369	-3.07446	-3.09603	-3.22205	-3.13428	-3.27834	-3.32109	-3.32191	-3.27732	-3.28825	-3.31458	-3.28764	-3.28542
hsa-miR-544b	2.43e-05	0.00023796	1.15066	-3.08291	-3.10814	-3.01235	-3.03369	-3.07446	-3.09603	-3.22205	-3.13428	-3.27834	-3.32109	-3.32191	-3.27732	-3.28825	-3.31458	-3.28764	-3.28542
hsa-miR-545-3p	2.43e-05	0.00023796	1.15066	-3.08291	-3.10814	-3.01235	-3.03369	-3.07446	-3.09603	-3.22205	-3.13428	-3.27834	-3.32109	-3.32191	-3.27732	-3.28825	-3.31458	-3.28764	-3.28542
hsa-miR-545-5p	2.43e-05	0.00023796	1.15066	-3.08291	-3.10814	-3.01235	-3.03369	-3.07446	-3.09603	-3.22205	-3.13428	-3.27834	-3.32109	-3.32191	-3.27732	-3.28825	-3.31458	-3.28764	-3.28542
hsa-miR-548a-3p	2.43e-05	0.00023796	1.15066	-3.08291	-3.10814	-3.01235	-3.03369	-3.07446	-3.09603	-3.22205	-3.13428	-3.27834	-3.32109	-3.32191	-3.27732	-3.28825	-3.31458	-3.28764	-3.28542
hsa-miR-548a-5p	2.43e-05	0.00023796	1.15066	-3.08291	-3.10814	-3.01235	-3.03369	-3.07446	-3.09603	-3.22205	-3.13428	-3.27834	-3.32109	-3.32191	-3.27732	-3.28825	-3.31458	-3.28764	-3.28542
hsa-miR-548aa	2.43e-05	0.00023796	1.15066	-3.08291	-3.10814	-3.01235	-3.03369	-3.07446	-3.09603	-3.22205	-3.13428	-3.27834	-3.32109	-3.32191	-3.27732	-3.28825	-3.31458	-3.28764	-3.28542
hsa-miR-548ab	2.43e-05	0.00023796	1.15066	-3.08291	-3.10814	-3.01235	-3.03369	-3.07446	-3.09603	-3.22205	-3.13428	-3.27834	-3.32109	-3.32191	-3.27732	-3.28825	-3.31458	-3.28764	-3.28542
hsa-miR-548ac	2.43e-05	0.00023796	1.15066	-3.08291	-3.10814	-3.01235	-3.03369	-3.07446	-3.09603	-3.22205	-3.13428	-3.27834	-3.32109	-3.32191	-3.27732	-3.28825	-3.31458	-3.28764	-3.28542
hsa-miR-548ad	2.43e-05	0.00023796	1.15066	-3.08291	-3.10814	-3.01235	-3.03369	-3.07446	-3.09603	-3.22205	-3.13428	-3.27834	-3.32109	-3.32191	-3.27732	-3.28825	-3.31458	-3.28764	-3.28542
hsa-miR-548ae	0.237511	0.258392	1.06769	-3.08291	-3.10814	-3.01235	-3.03369	-3.07446	-3.09603	-3.22205	-3.13428	-3.27834	-3.32109	-3.32191	-3.27732	-3.28825	-2.61018	-3.28764	-3.28542
hsa-miR-548ag	2.43e-05	0.00023796	1.15066	-3.08291	-3.10814	-3.01235	-3.03369	-3.07446	-3.09603	-3.22205	-3.13428	-3.27834	-3.32109	-3.32191	-3.27732	-3.28825	-3.31458	-3.28764	-3.28542
hsa-miR-548ah-5p	2.43e-05	0.00023796	1.15066	-3.08291	-3.10814	-3.01235	-3.03369	-3.07446	-3.09603	-3.22205	-3.13428	-3.27834	-3.32109	-3.32191	-3.27732	-3.28825	-3.31458	-3.28764	-3.28542
hsa-miR-548ai	2.43e-05	0.00023796	1.15066	-3.08291	-3.10814	-3.01235	-3.03369	-3.07446	-3.09603	-3.22205	-3.13428	-3.27834	-3.32109	-3.32191	-3.27732	-3.28825	-3.31458	-3.28764	-3.28542
hsa-miR-548aj-3p	0.237511	0.258392	1.06769	-3.08291	-3.10814	-3.01235	-3.03369	-3.07446	-3.09603	-3.22205	-3.13428	-3.27834	-3.32109	-3.32191	-3.27732	-3.28825	-2.61018	-3.28764	-3.28542
hsa-miR-548aj-5p	2.43e-05	0.00023796	1.15066	-3.08291	-3.10814	-3.01235	-3.03369	-3.07446	-3.09603	-3.22205	-3.13428	-3.27834	-3.32109	-3.32191	-3.27732	-3.28825	-3.31458	-3.28764	-3.28542
hsa-miR-548ak	2.43e-05	0.00023796	1.15066	-3.08291	-3.10814	-3.01235	-3.03369	-3.07446	-3.09603	-3.22205	-3.13428	-3.27834	-3.32109	-3.32191	-3.27732	-3.28825	-3.31458	-3.28764	-3.28542
hsa-miR-548al	2.43e-05	0.00023796	1.15066	-3.08291	-3.10814	-3.01235	-3.03369	-3.07446	-3.09603	-3.22205	-3.13428	-3.27834	-3.32109	-3.32191	-3.27732	-3.28825	-3.31458	-3.28764	-3.28542
hsa-miR-548am-3p	2.43e-05	0.00023796	1.15066	-3.08291	-3.10814	-3.01235	-3.03369	-3.07446	-3.09603	-3.22205	-3.13428	-3.27834	-3.32109	-3.32191	-3.27732	-3.28825	-3.31458	-3.28764	-3.28542
hsa-miR-548am-5p	2.43e-05	0.00023796	1.15066	-3.08291	-3.10814	-3.01235	-3.03369	-3.07446	-3.09603	-3.22205	-3.13428	-3.27834	-3.32109	-3.32191	-3.27732	-3.28825	-3.31458	-3.28764	-3.28542
hsa-miR-548an	2.43e-05	0.00023796	1.15066	-3.08291	-3.10814	-3.01235	-3.03369	-3.07446	-3.09603	-3.22205	-3.13428	-3.27834	-3.32109	-3.32191	-3.27732	-3.28825	-3.31458	-3.28764	-3.28542
hsa-miR-548ao-3p	2.43e-05	0.00023796	1.15066	-3.08291	-3.10814	-3.01235	-3.03369	-3.07446	-3.09603	-3.22205	-3.13428	-3.27834	-3.32109	-3.32191	-3.27732	-3.28825	-3.31458	-3.28764	-3.28542
hsa-miR-548ao-5p	2.43e-05	0.00023796	1.15066	-3.08291	-3.10814	-3.01235	-3.03369	-3.07446	-3.09603	-3.22205	-3.13428	-3.27834	-3.32109	-3.32191	-3.27732	-3.28825	-3.31458	-3.28764	-3.28542
hsa-miR-548ap-3p	0.237511	0.258392	1.06769	-3.08291	-3.10814	-3.01235	-3.03369	-3.07446	-3.09603	-3.22205	-3.13428	-3.27834	-3.32109	-3.32191	-3.27732	-3.28825	-2.61018	-3.28764	-3.28542
hsa-miR-548ap-5p	2.43e-05	0.00023796	1.15066	-3.08291	-3.10814	-3.01235	-3.03369	-3.07446	-3.09603	-3.22205	-3.13428	-3.27834	-3.32109	-3.32191	-3.27732	-3.28825	-3.31458	-3.28764	-3.28542
hsa-miR-548aq-5p	2.43e-05	0.00023796	1.15066	-3.08291	-3.10814	-3.01235	-3.03369	-3.07446	-3.09603	-3.22205	-3.13428	-3.27834	-3.32109	-3.32191	-3.27732	-3.28825	-3.31458	-3.28764	-3.28542
hsa-miR-548ar-3p	2.43e-05	0.00023796	1.15066	-3.08291	-3.10814	-3.01235	-3.03369	-3.07446	-3.09603	-3.22205	-3.13428	-3.27834	-3.32109	-3.32191	-3.27732	-3.28825	-3.31458	-3.28764	-3.28542
hsa-miR-548ar-5p	2.43e-05	0.00023796	1.15066	-3.08291	-3.10814	-3.01235	-3.03369	-3.07446	-3.09603	-3.22205	-3.13428	-3.27834	-3.32109	-3.32191	-3.27732	-3.28825	-3.31458	-3.28764	-3.28542
hsa-miR-548as-3p	2.43e-05	0.00023796	1.15066	-3.08291	-3.10814	-3.01235	-3.03369	-3.07446	-3.09603	-3.22205	-3.13428	-3.27834	-3.32109	-3.32191	-3.27732	-3.28825	-3.31458	-3.28764	-3.28542
hsa-miR-548as-5p	2.43e-05	0.00023796	1.15066	-3.08291	-3.10814	-3.01235	-3.03369	-3.07446	-3.09603	-3.22205	-3.13428	-3.27834	-3.32109	-3.32191	-3.27732	-3.28825	-3.31458	-3.28764	-3.28542
hsa-miR-548at-3p	2.43e-05	0.00023796	1.15066	-3.08291	-3.10814	-3.01235	-3.03369	-3.07446	-3.09603	-3.22205	-3.13428	-3.27834	-3.32109	-3.32191	-3.27732	-3.28825	-3.31458	-3.28764	-3.28542
hsa-miR-548at-5p	2.43e-05	0.00023796	1.15066	-3.08291	-3.10814	-3.01235	-3.03369	-3.07446	-3.09603	-3.22205	-3.13428	-3.27834	-3.32109	-3.32191	-3.27732	-3.28825	-3.31458	-3.28764	-3.28542
hsa-miR-548au-3p	2.43e-05	0.00023796	1.15066	-3.08291	-3.10814	-3.01235	-3.03369	-3.07446	-3.09603	-3.22205	-3.13428	-3.27834	-3.32109	-3.32191	-3.27732	-3.28825	-3.31458	-3.28764	-3.28542
hsa-miR-548au-5p	2.43e-05	0.00023796	1.15066	-3.08291	-3.10814	-3.01235	-3.03369	-3.07446	-3.09603	-3.22205	-3.13428	-3.27834	-3.32109	-3.32191	-3.27732	-3.28825	-3.31458	-3.28764	-3.28542
hsa-miR-548av-3p	2.43e-05	0.00023796	1.15066	-3.08291	-3.10814	-3.01235	-3.03369	-3.07446	-3.09603	-3.22205	-3.13428	-3.27834	-3.32109	-3.32191	-3.27732	-3.28825	-3.31458	-3.28764	-3.28542
hsa-miR-548av-5p	2.43e-05	0.00023796	1.15066	-3.08291	-3.10814	-3.01235	-3.03369	-3.07446	-3.09603	-3.22205	-3.13428	-3.27834	-3.32109	-3.32191	-3.27732	-3.28825	-3.31458	-3.28764	-3.28542
hsa-miR-548aw	2.43e-05	0.00023796	1.15066	-3.08291	-3.10814	-3.01235	-3.03369	-3.07446	-3.09603	-3.22205	-3.13428	-3.27834	-3.32109	-3.32191	-3.27732	-3.28825	-3.31458	-3.28764	-3.28542
hsa-miR-548ax	2.43e-05	0.00023796	1.15066	-3.08291	-3.10814	-3.01235	-3.03369	-3.07446	-3.09603	-3.22205	-3.13428	-3.27834	-3.32109	-3.32191	-3.27732	-3.28825	-3.31458	-3.28764	-3.28542
hsa-miR-548ay-3p	2.43e-05	0.00023796	1.15066	-3.08291	-3.10814	-3.01235	-3.03369	-3.07446	-3.09603	-3.22205	-3.13428	-3.27834	-3.32109	-3.32191	-3.27732	-3.28825	-3.31458	-3.28764	-3.28542
hsa-miR-548ay-5p	2.43e-05	0.00023796	1.15066	-3.08291	-3.10814	-3.01235	-3.03369	-3.07446	-3.09603	-3.22205	-3.13428	-3.27834	-3.32109	-3.32191	-3.27732	-3.28825	-3.31458	-3.28764	-3.28542
hsa-miR-548az-3p	2.43e-05	0.00023796	1.15066	-3.08291	-3.10814	-3.01235	-3.03369	-3.07446	-3.09603	-3.22205	-3.13428	-3.27834	-3.32109	-3.32191	-3.27732	-3.28825	-3.31458	-3.28764	-3.28542
hsa-miR-548az-5p	2.43e-05	0.00023796	1.15066	-3.08291	-3.10814	-3.01235	-3.03369	-3.07446	-3.09603	-3.22205	-3.13428	-3.27834	-3.32109	-3.32191	-3.27732	-3.28825	-3.31458	-3.28764	-3.28542
hsa-miR-548b-3p	2.43e-05	0.00023796	1.15066	-3.08291	-3.10814	-3.01235	-3.03369	-3.07446	-3.09603	-3.22205	-3.13428	-3.27834	-3.32109	-3.32191	-3.27732	-3.28825	-3.31458	-3.28764	-3.28542
hsa-miR-548b-5p	2.43e-05	0.00023796	1.15066	-3.08291	-3.10814	-3.01235	-3.03369	-3.07446	-3.09603	-3.22205	-3.13428	-3.27834	-3.32109	-3.32191	-3.27732	-3.28825	-3.31458	-3.28764	-3.28542
hsa-miR-548c-3p	0.237511	0.258392	1.06769	-3.08291	-3.10814	-3.01235	-3.03369	-3.07446	-3.09603	-3.22205	-3.13428	-3.27834	-3.32109	-3.32191	-3.27732	-3.28825	-2.61018	-3.28764	-3.28542
hsa-miR-548d-3p	2.43e-05	0.00023796	1.15066	-3.08291	-3.10814	-3.01235	-3.03369	-3.07446	-3.09603	-3.22205	-3.13428	-3.27834	-3.32109	-3.32191	-3.27732	-3.28825	-3.31458	-3.28764	-3.28542
hsa-miR-548d-5p	2.43e-05	0.00023796	1.15066	-3.08291	-3.10814	-3.01235	-3.03369	-3.07446	-3.09603	-3.22205	-3.13428	-3.27834	-3.32109	-3.32191	-3.27732	-3.28825	-3.31458	-3.28764	-3.28542
hsa-miR-548e	2.43e-05	0.00023796	1.15066	-3.08291	-3.10814	-3.01235	-3.03369	-3.07446	-3.09603	-3.22205	-3.13428	-3.27834	-3.32109	-3.32191	-3.27732	-3.28825	-3.31458	-3.28764	-3.28542
hsa-miR-548f	2.43e-05	0.00023796	1.15066	-3.08291	-3.10814	-3.01235	-3.03369	-3.07446	-3.09603	-3.22205	-3.13428	-3.27834	-3.32109	-3.32191	-3.27732	-3.28825	-3.31458	-3.28764	-3.28542
hsa-miR-548g-3p	2.43e-05	0.00023796	1.15066	-3.08291	-3.10814	-3.01235	-3.03369	-3.07446	-3.09603	-3.22205	-3.13428	-3.27834	-3.32109	-3.32191	-3.27732	-3.28825	-3.31458	-3.28764	-3.28542
hsa-miR-548h-3p	2.43e-05	0.00023796	1.15066	-3.08291	-3.10814	-3.01235	-3.03369	-3.07446	-3.09603	-3.22205	-3.13428	-3.27834	-3.32109	-3.32191	-3.27732	-3.28825	-3.31458	-3.28764	-3.28542
hsa-miR-548h-5p	2.43e-05	0.00023796	1.15066	-3.08291	-3.10814	-3.01235	-3.03369	-3.07446	-3.09603	-3.22205	-3.13428	-3.27834	-3.32109	-3.32191	-3.27732	-3.28825	-3.31458	-3.28764	-3.28542
hsa-miR-548i	2.43e-05	0.00023796	1.15066	-3.08291	-3.10814	-3.01235	-3.03369	-3.07446	-3.09603	-3.22205	-3.13428	-3.27834	-3.32109	-3.32191	-3.27732	-3.28825	-3.31458	-3.28764	-3.28542
hsa-miR-548j	2.43e-05	0.00023796	1.15066	-3.08291	-3.10814	-3.01235	-3.03369	-3.07446	-3.09603	-3.22205	-3.13428	-3.27834	-3.32109	-3.32191	-3.27732	-3.28825	-3.31458	-3.28764	-3.28542
hsa-miR-548k	2.43e-05	0.00023796	1.15066	-3.08291	-3.10814	-3.01235	-3.03369	-3.07446	-3.09603	-3.22205	-3.13428	-3.27834	-3.32109	-3.32191	-3.27732	-3.28825	-3.31458	-3.28764	-3.28542
hsa-miR-548l	2.43e-05	0.00023796	1.15066	-3.08291	-3.10814	-3.01235	-3.03369	-3.07446	-3.09603	-3.22205	-3.13428	-3.27834	-3.32109	-3.32191	-3.27732	-3.28825	-3.31458	-3.28764	-3.28542
hsa-miR-548m	2.43e-05	0.00023796	1.15066	-3.08291	-3.10814	-3.01235	-3.03369	-3.07446	-3.09603	-3.22205	-3.13428	-3.27834	-3.32109	-3.32191	-3.27732	-3.28825	-3.31458	-3.28764	-3.28542
hsa-miR-548n	2.43e-05	0.00023796	1.15066	-3.08291	-3.10814	-3.01235	-3.03369	-3.07446	-3.09603	-3.22205	-3.13428	-3.27834	-3.32109	-3.32191	-3.27732	-3.28825	-3.31458	-3.28764	-3.28542
hsa-miR-548p	2.43e-05	0.00023796	1.15066	-3.08291	-3.10814	-3.01235	-3.03369	-3.07446	-3.09603	-3.22205	-3.13428	-3.27834	-3.32109	-3.32191	-3.27732	-3.28825	-3.31458	-3.28764	-3.28542
hsa-miR-548q	0.48945	0.628747	1.03448	-3.08291	-3.10814	-3.01235	-3.03369	-3.07446	-3.09603	-3.22205	-3.13428	-3.27834	-3.32109	-3.32191	-3.27732	-3.28825	-2.38125	-3.28764	-3.28542
hsa-miR-548s	2.43e-05	0.00023796	1.15066	-3.08291	-3.10814	-3.01235	-3.03369	-3.07446	-3.09603	-3.22205	-3.13428	-3.27834	-3.32109	-3.32191	-3.27732	-3.28825	-3.31458	-3.28764	-3.28542
hsa-miR-548t-5p	2.43e-05	0.00023796	1.15066	-3.08291	-3.10814	-3.01235	-3.03369	-3.07446	-3.09603	-3.22205	-3.13428	-3.27834	-3.32109	-3.32191	-3.27732	-3.28825	-3.31458	-3.28764	-3.28542
hsa-miR-548u	2.43e-05	0.00023796	1.15066	-3.08291	-3.10814	-3.01235	-3.03369	-3.07446	-3.09603	-3.22205	-3.13428	-3.27834	-3.32109	-3.32191	-3.27732	-3.28825	-3.31458	-3.28764	-3.28542
hsa-miR-548v	2.43e-05	0.00023796	1.15066	-3.08291	-3.10814	-3.01235	-3.03369	-3.07446	-3.09603	-3.22205	-3.13428	-3.27834	-3.32109	-3.32191	-3.27732	-3.28825	-3.31458	-3.28764	-3.28542
hsa-miR-548w	2.43e-05	0.00023796	1.15066	-3.08291	-3.10814	-3.01235	-3.03369	-3.07446	-3.09603	-3.22205	-3.13428	-3.27834	-3.32109	-3.32191	-3.27732	-3.28825	-3.31458	-3.28764	-3.28542
hsa-miR-548x-3p	2.43e-05	0.00023796	1.15066	-3.08291	-3.10814	-3.01235	-3.03369	-3.07446	-3.09603	-3.22205	-3.13428	-3.27834	-3.32109	-3.32191	-3.27732	-3.28825	-3.31458	-3.28764	-3.28542
hsa-miR-548y	2.43e-05	0.00023796	1.15066	-3.08291	-3.10814	-3.01235	-3.03369	-3.07446	-3.09603	-3.22205	-3.13428	-3.27834	-3.32109	-3.32191	-3.27732	-3.28825	-3.31458	-3.28764	-3.28542
hsa-miR-549a	2.43e-05	0.00023796	1.15066	-3.08291	-3.10814	-3.01235	-3.03369	-3.07446	-3.09603	-3.22205	-3.13428	-3.27834	-3.32109	-3.32191	-3.27732	-3.28825	-3.31458	-3.28764	-3.28542
hsa-miR-550a-3-5p	2.43e-05	0.00023796	1.15066	-3.08291	-3.10814	-3.01235	-3.03369	-3.07446	-3.09603	-3.22205	-3.13428	-3.27834	-3.32109	-3.32191	-3.27732	-3.28825	-3.31458	-3.28764	-3.28542
hsa-miR-550a-3p	2.43e-05	0.00023796	1.15066	-3.08291	-3.10814	-3.01235	-3.03369	-3.07446	-3.09603	-3.22205	-3.13428	-3.27834	-3.32109	-3.32191	-3.27732	-3.28825	-3.31458	-3.28764	-3.28542
hsa-miR-550a-5p	2.43e-05	0.00023796	1.15066	-3.08291	-3.10814	-3.01235	-3.03369	-3.07446	-3.09603	-3.22205	-3.13428	-3.27834	-3.32109	-3.32191	-3.27732	-3.28825	-3.31458	-3.28764	-3.28542
hsa-miR-550b-2-5p	2.43e-05	0.00023796	1.15066	-3.08291	-3.10814	-3.01235	-3.03369	-3.07446	-3.09603	-3.22205	-3.13428	-3.27834	-3.32109	-3.32191	-3.27732	-3.28825	-3.31458	-3.28764	-3.28542
hsa-miR-550b-3p	2.43e-05	0.00023796	1.15066	-3.08291	-3.10814	-3.01235	-3.03369	-3.07446	-3.09603	-3.22205	-3.13428	-3.27834	-3.32109	-3.32191	-3.27732	-3.28825	-3.31458	-3.28764	-3.28542
hsa-miR-551a	2.43e-05	0.00023796	1.15066	-3.08291	-3.10814	-3.01235	-3.03369	-3.07446	-3.09603	-3.22205	-3.13428	-3.27834	-3.32109	-3.32191	-3.27732	-3.28825	-3.31458	-3.28764	-3.28542
hsa-miR-551b-3p	2.43e-05	0.00023796	1.15066	-3.08291	-3.10814	-3.01235	-3.03369	-3.07446	-3.09603	-3.22205	-3.13428	-3.27834	-3.32109	-3.32191	-3.27732	-3.28825	-3.31458	-3.28764	-3.28542
hsa-miR-551b-5p	2.43e-05	0.00023796	1.15066	-3.08291	-3.10814	-3.01235	-3.03369	-3.07446	-3.09603	-3.22205	-3.13428	-3.27834	-3.32109	-3.32191	-3.27732	-3.28825	-3.31458	-3.28764	-3.28542
hsa-miR-552	2.43e-05	0.00023796	1.15066	-3.08291	-3.10814	-3.01235	-3.03369	-3.07446	-3.09603	-3.22205	-3.13428	-3.27834	-3.32109	-3.32191	-3.27732	-3.28825	-3.31458	-3.28764	-3.28542
hsa-miR-553	2.43e-05	0.00023796	1.15066	-3.08291	-3.10814	-3.01235	-3.03369	-3.07446	-3.09603	-3.22205	-3.13428	-3.27834	-3.32109	-3.32191	-3.27732	-3.28825	-3.31458	-3.28764	-3.28542
hsa-miR-554	2.43e-05	0.00023796	1.15066	-3.08291	-3.10814	-3.01235	-3.03369	-3.07446	-3.09603	-3.22205	-3.13428	-3.27834	-3.32109	-3.32191	-3.27732	-3.28825	-3.31458	-3.28764	-3.28542
hsa-miR-555	2.43e-05	0.00023796	1.15066	-3.08291	-3.10814	-3.01235	-3.03369	-3.07446	-3.09603	-3.22205	-3.13428	-3.27834	-3.32109	-3.32191	-3.27732	-3.28825	-3.31458	-3.28764	-3.28542
hsa-miR-556-3p	2.43e-05	0.00023796	1.15066	-3.08291	-3.10814	-3.01235	-3.03369	-3.07446	-3.09603	-3.22205	-3.13428	-3.27834	-3.32109	-3.32191	-3.27732	-3.28825	-3.31458	-3.28764	-3.28542
hsa-miR-556-5p	2.43e-05	0.00023796	1.15066	-3.08291	-3.10814	-3.01235	-3.03369	-3.07446	-3.09603	-3.22205	-3.13428	-3.27834	-3.32109	-3.32191	-3.27732	-3.28825	-3.31458	-3.28764	-3.28542
hsa-miR-557	0.0377417	0.0506537	0.370278	-3.08291	-3.10814	-3.01235	-3.03369	-3.07446	-3.09603	-3.22205	-3.13428	-3.27834	-2.90307	-3.01848	-3.27732	-1.12546	-1.11382	-0.897512	-0.714654
hsa-miR-5571-3p	2.43e-05	0.00023796	1.15066	-3.08291	-3.10814	-3.01235	-3.03369	-3.07446	-3.09603	-3.22205	-3.13428	-3.27834	-3.32109	-3.32191	-3.27732	-3.28825	-3.31458	-3.28764	-3.28542
hsa-miR-5571-5p	2.43e-05	0.00023796	1.15066	-3.08291	-3.10814	-3.01235	-3.03369	-3.07446	-3.09603	-3.22205	-3.13428	-3.27834	-3.32109	-3.32191	-3.27732	-3.28825	-3.31458	-3.28764	-3.28542
hsa-miR-5572	2.43e-05	0.00023796	1.15066	-3.08291	-3.10814	-3.01235	-3.03369	-3.07446	-3.09603	-3.22205	-3.13428	-3.27834	-3.32109	-3.32191	-3.27732	-3.28825	-3.31458	-3.28764	-3.28542
hsa-miR-5579-3p	2.43e-05	0.00023796	1.15066	-3.08291	-3.10814	-3.01235	-3.03369	-3.07446	-3.09603	-3.22205	-3.13428	-3.27834	-3.32109	-3.32191	-3.27732	-3.28825	-3.31458	-3.28764	-3.28542
hsa-miR-5579-5p	2.43e-05	0.00023796	1.15066	-3.08291	-3.10814	-3.01235	-3.03369	-3.07446	-3.09603	-3.22205	-3.13428	-3.27834	-3.32109	-3.32191	-3.27732	-3.28825	-3.31458	-3.28764	-3.28542
hsa-miR-558	2.43e-05	0.00023796	1.15066	-3.08291	-3.10814	-3.01235	-3.03369	-3.07446	-3.09603	-3.22205	-3.13428	-3.27834	-3.32109	-3.32191	-3.27732	-3.28825	-3.31458	-3.28764	-3.28542
hsa-miR-5580-3p	2.43e-05	0.00023796	1.15066	-3.08291	-3.10814	-3.01235	-3.03369	-3.07446	-3.09603	-3.22205	-3.13428	-3.27834	-3.32109	-3.32191	-3.27732	-3.28825	-3.31458	-3.28764	-3.28542
hsa-miR-5580-5p	2.43e-05	0.00023796	1.15066	-3.08291	-3.10814	-3.01235	-3.03369	-3.07446	-3.09603	-3.22205	-3.13428	-3.27834	-3.32109	-3.32191	-3.27732	-3.28825	-3.31458	-3.28764	-3.28542
hsa-miR-5581-3p	2.43e-05	0.00023796	1.15066	-3.08291	-3.10814	-3.01235	-3.03369	-3.07446	-3.09603	-3.22205	-3.13428	-3.27834	-3.32109	-3.32191	-3.27732	-3.28825	-3.31458	-3.28764	-3.28542
hsa-miR-5581-5p	2.43e-05	0.00023796	1.15066	-3.08291	-3.10814	-3.01235	-3.03369	-3.07446	-3.09603	-3.22205	-3.13428	-3.27834	-3.32109	-3.32191	-3.27732	-3.28825	-3.31458	-3.28764	-3.28542
hsa-miR-5582-3p	2.43e-05	0.00023796	1.15066	-3.08291	-3.10814	-3.01235	-3.03369	-3.07446	-3.09603	-3.22205	-3.13428	-3.27834	-3.32109	-3.32191	-3.27732	-3.28825	-3.31458	-3.28764	-3.28542
hsa-miR-5582-5p	2.43e-05	0.00023796	1.15066	-3.08291	-3.10814	-3.01235	-3.03369	-3.07446	-3.09603	-3.22205	-3.13428	-3.27834	-3.32109	-3.32191	-3.27732	-3.28825	-3.31458	-3.28764	-3.28542
hsa-miR-5583-3p	2.43e-05	0.00023796	1.15066	-3.08291	-3.10814	-3.01235	-3.03369	-3.07446	-3.09603	-3.22205	-3.13428	-3.27834	-3.32109	-3.32191	-3.27732	-3.28825	-3.31458	-3.28764	-3.28542
hsa-miR-5583-5p	2.43e-05	0.00023796	1.15066	-3.08291	-3.10814	-3.01235	-3.03369	-3.07446	-3.09603	-3.22205	-3.13428	-3.27834	-3.32109	-3.32191	-3.27732	-3.28825	-3.31458	-3.28764	-3.28542
hsa-miR-5584-3p	2.43e-05	0.00023796	1.15066	-3.08291	-3.10814	-3.01235	-3.03369	-3.07446	-3.09603	-3.22205	-3.13428	-3.27834	-3.32109	-3.32191	-3.27732	-3.28825	-3.31458	-3.28764	-3.28542
hsa-miR-5584-5p	2.43e-05	0.00023796	1.15066	-3.08291	-3.10814	-3.01235	-3.03369	-3.07446	-3.09603	-3.22205	-3.13428	-3.27834	-3.32109	-3.32191	-3.27732	-3.28825	-3.31458	-3.28764	-3.28542
hsa-miR-5585-3p	0.0518012	0.0361035	0.203374	-3.08291	-3.10814	-3.01235	-3.03369	-3.07446	-3.09603	-3.22205	-3.13428	-3.27834	-0.980708	-0.839665	1.32389	-3.28825	-2.55138	-3.28764	-0.839665
hsa-miR-5585-5p	2.43e-05	0.00023796	1.15066	-3.08291	-3.10814	-3.01235	-3.03369	-3.07446	-3.09603	-3.22205	-3.13428	-3.27834	-3.32109	-3.32191	-3.27732	-3.28825	-3.31458	-3.28764	-3.28542
hsa-miR-5586-3p	2.43e-05	0.00023796	1.15066	-3.08291	-3.10814	-3.01235	-3.03369	-3.07446	-3.09603	-3.22205	-3.13428	-3.27834	-3.32109	-3.32191	-3.27732	-3.28825	-3.31458	-3.28764	-3.28542
hsa-miR-5586-5p	2.43e-05	0.00023796	1.15066	-3.08291	-3.10814	-3.01235	-3.03369	-3.07446	-3.09603	-3.22205	-3.13428	-3.27834	-3.32109	-3.32191	-3.27732	-3.28825	-3.31458	-3.28764	-3.28542
hsa-miR-5587-3p	2.43e-05	0.00023796	1.15066	-3.08291	-3.10814	-3.01235	-3.03369	-3.07446	-3.09603	-3.22205	-3.13428	-3.27834	-3.32109	-3.32191	-3.27732	-3.28825	-3.31458	-3.28764	-3.28542
hsa-miR-5587-5p	2.43e-05	0.00023796	1.15066	-3.08291	-3.10814	-3.01235	-3.03369	-3.07446	-3.09603	-3.22205	-3.13428	-3.27834	-3.32109	-3.32191	-3.27732	-3.28825	-3.31458	-3.28764	-3.28542
hsa-miR-5588-3p	2.43e-05	0.00023796	1.15066	-3.08291	-3.10814	-3.01235	-3.03369	-3.07446	-3.09603	-3.22205	-3.13428	-3.27834	-3.32109	-3.32191	-3.27732	-3.28825	-3.31458	-3.28764	-3.28542
hsa-miR-5588-5p	2.43e-05	0.00023796	1.15066	-3.08291	-3.10814	-3.01235	-3.03369	-3.07446	-3.09603	-3.22205	-3.13428	-3.27834	-3.32109	-3.32191	-3.27732	-3.28825	-3.31458	-3.28764	-3.28542
hsa-miR-5589-3p	2.43e-05	0.00023796	1.15066	-3.08291	-3.10814	-3.01235	-3.03369	-3.07446	-3.09603	-3.22205	-3.13428	-3.27834	-3.32109	-3.32191	-3.27732	-3.28825	-3.31458	-3.28764	-3.28542
hsa-miR-5589-5p	2.43e-05	0.00023796	1.15066	-3.08291	-3.10814	-3.01235	-3.03369	-3.07446	-3.09603	-3.22205	-3.13428	-3.27834	-3.32109	-3.32191	-3.27732	-3.28825	-3.31458	-3.28764	-3.28542
hsa-miR-559	2.43e-05	0.00023796	1.15066	-3.08291	-3.10814	-3.01235	-3.03369	-3.07446	-3.09603	-3.22205	-3.13428	-3.27834	-3.32109	-3.32191	-3.27732	-3.28825	-3.31458	-3.28764	-3.28542
hsa-miR-5590-3p	2.43e-05	0.00023796	1.15066	-3.08291	-3.10814	-3.01235	-3.03369	-3.07446	-3.09603	-3.22205	-3.13428	-3.27834	-3.32109	-3.32191	-3.27732	-3.28825	-3.31458	-3.28764	-3.28542
hsa-miR-5590-5p	2.43e-05	0.00023796	1.15066	-3.08291	-3.10814	-3.01235	-3.03369	-3.07446	-3.09603	-3.22205	-3.13428	-3.27834	-3.32109	-3.32191	-3.27732	-3.28825	-3.31458	-3.28764	-3.28542
hsa-miR-5591-3p	2.43e-05	0.00023796	1.15066	-3.08291	-3.10814	-3.01235	-3.03369	-3.07446	-3.09603	-3.22205	-3.13428	-3.27834	-3.32109	-3.32191	-3.27732	-3.28825	-3.31458	-3.28764	-3.28542
hsa-miR-5591-5p	2.43e-05	0.00023796	1.15066	-3.08291	-3.10814	-3.01235	-3.03369	-3.07446	-3.09603	-3.22205	-3.13428	-3.27834	-3.32109	-3.32191	-3.27732	-3.28825	-3.31458	-3.28764	-3.28542
hsa-miR-561-3p	2.43e-05	0.00023796	1.15066	-3.08291	-3.10814	-3.01235	-3.03369	-3.07446	-3.09603	-3.22205	-3.13428	-3.27834	-3.32109	-3.32191	-3.27732	-3.28825	-3.31458	-3.28764	-3.28542
hsa-miR-561-5p	2.43e-05	0.00023796	1.15066	-3.08291	-3.10814	-3.01235	-3.03369	-3.07446	-3.09603	-3.22205	-3.13428	-3.27834	-3.32109	-3.32191	-3.27732	-3.28825	-3.31458	-3.28764	-3.28542
hsa-miR-562	2.43e-05	0.00023796	1.15066	-3.08291	-3.10814	-3.01235	-3.03369	-3.07446	-3.09603	-3.22205	-3.13428	-3.27834	-3.32109	-3.32191	-3.27732	-3.28825	-3.31458	-3.28764	-3.28542
hsa-miR-563	2.43e-05	0.00023796	1.15066	-3.08291	-3.10814	-3.01235	-3.03369	-3.07446	-3.09603	-3.22205	-3.13428	-3.27834	-3.32109	-3.32191	-3.27732	-3.28825	-3.31458	-3.28764	-3.28542
hsa-miR-564	2.43e-05	0.00023796	1.15066	-3.08291	-3.10814	-3.01235	-3.03369	-3.07446	-3.09603	-3.22205	-3.13428	-3.27834	-3.32109	-3.32191	-3.27732	-3.28825	-3.31458	-3.28764	-3.28542
hsa-miR-566	2.43e-05	0.00023796	1.15066	-3.08291	-3.10814	-3.01235	-3.03369	-3.07446	-3.09603	-3.22205	-3.13428	-3.27834	-3.32109	-3.32191	-3.27732	-3.28825	-3.31458	-3.28764	-3.28542
hsa-miR-567	2.43e-05	0.00023796	1.15066	-3.08291	-3.10814	-3.01235	-3.03369	-3.07446	-3.09603	-3.22205	-3.13428	-3.27834	-3.32109	-3.32191	-3.27732	-3.28825	-3.31458	-3.28764	-3.28542
hsa-miR-568	2.43e-05	0.00023796	1.15066	-3.08291	-3.10814	-3.01235	-3.03369	-3.07446	-3.09603	-3.22205	-3.13428	-3.27834	-3.32109	-3.32191	-3.27732	-3.28825	-3.31458	-3.28764	-3.28542
hsa-miR-5680	2.43e-05	0.00023796	1.15066	-3.08291	-3.10814	-3.01235	-3.03369	-3.07446	-3.09603	-3.22205	-3.13428	-3.27834	-3.32109	-3.32191	-3.27732	-3.28825	-3.31458	-3.28764	-3.28542
hsa-miR-5681a	2.43e-05	0.00023796	1.15066	-3.08291	-3.10814	-3.01235	-3.03369	-3.07446	-3.09603	-3.22205	-3.13428	-3.27834	-3.32109	-3.32191	-3.27732	-3.28825	-3.31458	-3.28764	-3.28542
hsa-miR-5681b	2.43e-05	0.00023796	1.15066	-3.08291	-3.10814	-3.01235	-3.03369	-3.07446	-3.09603	-3.22205	-3.13428	-3.27834	-3.32109	-3.32191	-3.27732	-3.28825	-3.31458	-3.28764	-3.28542
hsa-miR-5682	2.43e-05	0.00023796	1.15066	-3.08291	-3.10814	-3.01235	-3.03369	-3.07446	-3.09603	-3.22205	-3.13428	-3.27834	-3.32109	-3.32191	-3.27732	-3.28825	-3.31458	-3.28764	-3.28542
hsa-miR-5683	2.43e-05	0.00023796	1.15066	-3.08291	-3.10814	-3.01235	-3.03369	-3.07446	-3.09603	-3.22205	-3.13428	-3.27834	-3.32109	-3.32191	-3.27732	-3.28825	-3.31458	-3.28764	-3.28542
hsa-miR-5684	2.43e-05	0.00023796	1.15066	-3.08291	-3.10814	-3.01235	-3.03369	-3.07446	-3.09603	-3.22205	-3.13428	-3.27834	-3.32109	-3.32191	-3.27732	-3.28825	-3.31458	-3.28764	-3.28542
hsa-miR-5685	2.43e-05	0.00023796	1.15066	-3.08291	-3.10814	-3.01235	-3.03369	-3.07446	-3.09603	-3.22205	-3.13428	-3.27834	-3.32109	-3.32191	-3.27732	-3.28825	-3.31458	-3.28764	-3.28542
hsa-miR-5686	2.43e-05	0.00023796	1.15066	-3.08291	-3.10814	-3.01235	-3.03369	-3.07446	-3.09603	-3.22205	-3.13428	-3.27834	-3.32109	-3.32191	-3.27732	-3.28825	-3.31458	-3.28764	-3.28542
hsa-miR-5687	2.43e-05	0.00023796	1.15066	-3.08291	-3.10814	-3.01235	-3.03369	-3.07446	-3.09603	-3.22205	-3.13428	-3.27834	-3.32109	-3.32191	-3.27732	-3.28825	-3.31458	-3.28764	-3.28542
hsa-miR-5688	2.43e-05	0.00023796	1.15066	-3.08291	-3.10814	-3.01235	-3.03369	-3.07446	-3.09603	-3.22205	-3.13428	-3.27834	-3.32109	-3.32191	-3.27732	-3.28825	-3.31458	-3.28764	-3.28542
hsa-miR-5689	2.43e-05	0.00023796	1.15066	-3.08291	-3.10814	-3.01235	-3.03369	-3.07446	-3.09603	-3.22205	-3.13428	-3.27834	-3.32109	-3.32191	-3.27732	-3.28825	-3.31458	-3.28764	-3.28542
hsa-miR-569	2.43e-05	0.00023796	1.15066	-3.08291	-3.10814	-3.01235	-3.03369	-3.07446	-3.09603	-3.22205	-3.13428	-3.27834	-3.32109	-3.32191	-3.27732	-3.28825	-3.31458	-3.28764	-3.28542
hsa-miR-5690	2.43e-05	0.00023796	1.15066	-3.08291	-3.10814	-3.01235	-3.03369	-3.07446	-3.09603	-3.22205	-3.13428	-3.27834	-3.32109	-3.32191	-3.27732	-3.28825	-3.31458	-3.28764	-3.28542
hsa-miR-5691	2.43e-05	0.00023796	1.15066	-3.08291	-3.10814	-3.01235	-3.03369	-3.07446	-3.09603	-3.22205	-3.13428	-3.27834	-3.32109	-3.32191	-3.27732	-3.28825	-3.31458	-3.28764	-3.28542
hsa-miR-5692a	2.43e-05	0.00023796	1.15066	-3.08291	-3.10814	-3.01235	-3.03369	-3.07446	-3.09603	-3.22205	-3.13428	-3.27834	-3.32109	-3.32191	-3.27732	-3.28825	-3.31458	-3.28764	-3.28542
hsa-miR-5692b	2.43e-05	0.00023796	1.15066	-3.08291	-3.10814	-3.01235	-3.03369	-3.07446	-3.09603	-3.22205	-3.13428	-3.27834	-3.32109	-3.32191	-3.27732	-3.28825	-3.31458	-3.28764	-3.28542
hsa-miR-5692c	2.43e-05	0.00023796	1.15066	-3.08291	-3.10814	-3.01235	-3.03369	-3.07446	-3.09603	-3.22205	-3.13428	-3.27834	-3.32109	-3.32191	-3.27732	-3.28825	-3.31458	-3.28764	-3.28542
hsa-miR-5693	2.43e-05	0.00023796	1.15066	-3.08291	-3.10814	-3.01235	-3.03369	-3.07446	-3.09603	-3.22205	-3.13428	-3.27834	-3.32109	-3.32191	-3.27732	-3.28825	-3.31458	-3.28764	-3.28542
hsa-miR-5694	2.43e-05	0.00023796	1.15066	-3.08291	-3.10814	-3.01235	-3.03369	-3.07446	-3.09603	-3.22205	-3.13428	-3.27834	-3.32109	-3.32191	-3.27732	-3.28825	-3.31458	-3.28764	-3.28542
hsa-miR-5695	2.43e-05	0.00023796	1.15066	-3.08291	-3.10814	-3.01235	-3.03369	-3.07446	-3.09603	-3.22205	-3.13428	-3.27834	-3.32109	-3.32191	-3.27732	-3.28825	-3.31458	-3.28764	-3.28542
hsa-miR-5696	2.43e-05	0.00023796	1.15066	-3.08291	-3.10814	-3.01235	-3.03369	-3.07446	-3.09603	-3.22205	-3.13428	-3.27834	-3.32109	-3.32191	-3.27732	-3.28825	-3.31458	-3.28764	-3.28542
hsa-miR-5697	2.43e-05	0.00023796	1.15066	-3.08291	-3.10814	-3.01235	-3.03369	-3.07446	-3.09603	-3.22205	-3.13428	-3.27834	-3.32109	-3.32191	-3.27732	-3.28825	-3.31458	-3.28764	-3.28542
hsa-miR-5698	2.43e-05	0.00023796	1.15066	-3.08291	-3.10814	-3.01235	-3.03369	-3.07446	-3.09603	-3.22205	-3.13428	-3.27834	-3.32109	-3.32191	-3.27732	-3.28825	-3.31458	-3.28764	-3.28542
hsa-miR-5699	2.43e-05	0.00023796	1.15066	-3.08291	-3.10814	-3.01235	-3.03369	-3.07446	-3.09603	-3.22205	-3.13428	-3.27834	-3.32109	-3.32191	-3.27732	-3.28825	-3.31458	-3.28764	-3.28542
hsa-miR-570-3p	2.43e-05	0.00023796	1.15066	-3.08291	-3.10814	-3.01235	-3.03369	-3.07446	-3.09603	-3.22205	-3.13428	-3.27834	-3.32109	-3.32191	-3.27732	-3.28825	-3.31458	-3.28764	-3.28542
hsa-miR-5700	2.43e-05	0.00023796	1.15066	-3.08291	-3.10814	-3.01235	-3.03369	-3.07446	-3.09603	-3.22205	-3.13428	-3.27834	-3.32109	-3.32191	-3.27732	-3.28825	-3.31458	-3.28764	-3.28542
hsa-miR-5701	2.43e-05	0.00023796	1.15066	-3.08291	-3.10814	-3.01235	-3.03369	-3.07446	-3.09603	-3.22205	-3.13428	-3.27834	-3.32109	-3.32191	-3.27732	-3.28825	-3.31458	-3.28764	-3.28542
hsa-miR-5702	2.43e-05	0.00023796	1.15066	-3.08291	-3.10814	-3.01235	-3.03369	-3.07446	-3.09603	-3.22205	-3.13428	-3.27834	-3.32109	-3.32191	-3.27732	-3.28825	-3.31458	-3.28764	-3.28542
hsa-miR-5703	0.00138033	0.00141517	0.138507	-3.08291	-3.10814	-3.01235	-3.03369	-3.07446	-3.09603	-3.22205	-3.13428	0.135307	-0.260423	-1.06881	-3.27732	0.512673	0.631801	-1.89603	0.00774522
hsa-miR-5704	2.43e-05	0.00023796	1.15066	-3.08291	-3.10814	-3.01235	-3.03369	-3.07446	-3.09603	-3.22205	-3.13428	-3.27834	-3.32109	-3.32191	-3.27732	-3.28825	-3.31458	-3.28764	-3.28542
hsa-miR-5705	2.43e-05	0.00023796	1.15066	-3.08291	-3.10814	-3.01235	-3.03369	-3.07446	-3.09603	-3.22205	-3.13428	-3.27834	-3.32109	-3.32191	-3.27732	-3.28825	-3.31458	-3.28764	-3.28542
hsa-miR-5706	2.43e-05	0.00023796	1.15066	-3.08291	-3.10814	-3.01235	-3.03369	-3.07446	-3.09603	-3.22205	-3.13428	-3.27834	-3.32109	-3.32191	-3.27732	-3.28825	-3.31458	-3.28764	-3.28542
hsa-miR-5707	2.43e-05	0.00023796	1.15066	-3.08291	-3.10814	-3.01235	-3.03369	-3.07446	-3.09603	-3.22205	-3.13428	-3.27834	-3.32109	-3.32191	-3.27732	-3.28825	-3.31458	-3.28764	-3.28542
hsa-miR-5708	2.43e-05	0.00023796	1.15066	-3.08291	-3.10814	-3.01235	-3.03369	-3.07446	-3.09603	-3.22205	-3.13428	-3.27834	-3.32109	-3.32191	-3.27732	-3.28825	-3.31458	-3.28764	-3.28542
hsa-miR-571	2.43e-05	0.00023796	1.15066	-3.08291	-3.10814	-3.01235	-3.03369	-3.07446	-3.09603	-3.22205	-3.13428	-3.27834	-3.32109	-3.32191	-3.27732	-3.28825	-3.31458	-3.28764	-3.28542
hsa-miR-572	0.00201719	0.00141517	0.155566	-3.08291	-3.10814	-3.01235	-3.03369	-3.07446	-3.09603	-3.22205	-3.13428	0.0522754	-0.867033	-2.4286	-3.27732	-0.725495	0.160329	0.241488	0.313855
hsa-miR-573	2.43e-05	0.00023796	1.15066	-3.08291	-3.10814	-3.01235	-3.03369	-3.07446	-3.09603	-3.22205	-3.13428	-3.27834	-3.32109	-3.32191	-3.27732	-3.28825	-3.31458	-3.28764	-3.28542
hsa-miR-5739	0.156668	0.153229	0.663282	-3.08291	-3.10814	-3.01235	-3.03369	2.94923	2.14251	2.47753	2.54588	0.300676	0.333962	0.217976	-0.0552746	3.50579	2.0349	3.14937	2.86355
hsa-miR-574-3p	2.43e-05	0.00023796	1.15066	-3.08291	-3.10814	-3.01235	-3.03369	-3.07446	-3.09603	-3.22205	-3.13428	-3.27834	-3.32109	-3.32191	-3.27732	-3.28825	-3.31458	-3.28764	-3.28542
hsa-miR-574-5p	0.171564	0.176373	0.713117	-3.08291	-3.10814	-3.01235	-3.03369	-3.07446	5.30778	-0.0552746	4.82129	-0.0352333	3.60188	1.68692	0.0522754	0.217976	6.25201	0.479904	0.300676
hsa-miR-575	0.0362559	0.0303681	0.288667	-3.08291	-3.10814	-3.01235	-3.03369	-3.07446	-3.09603	-3.22205	-3.13428	-3.27834	-2.43931	-3.32191	-3.27732	-0.950789	-0.0733799	-0.636215	-0.636215
hsa-miR-576-3p	2.43e-05	0.00023796	1.15066	-3.08291	-3.10814	-3.01235	-3.03369	-3.07446	-3.09603	-3.22205	-3.13428	-3.27834	-3.32109	-3.32191	-3.27732	-3.28825	-3.31458	-3.28764	-3.28542
hsa-miR-576-5p	2.43e-05	0.00023796	1.15066	-3.08291	-3.10814	-3.01235	-3.03369	-3.07446	-3.09603	-3.22205	-3.13428	-3.27834	-3.32109	-3.32191	-3.27732	-3.28825	-3.31458	-3.28764	-3.28542
hsa-miR-577	2.43e-05	0.00023796	1.15066	-3.08291	-3.10814	-3.01235	-3.03369	-3.07446	-3.09603	-3.22205	-3.13428	-3.27834	-3.32109	-3.32191	-3.27732	-3.28825	-3.31458	-3.28764	-3.28542
hsa-miR-578	2.43e-05	0.00023796	1.15066	-3.08291	-3.10814	-3.01235	-3.03369	-3.07446	-3.09603	-3.22205	-3.13428	-3.27834	-3.32109	-3.32191	-3.27732	-3.28825	-3.31458	-3.28764	-3.28542
hsa-miR-5787	0.0125106	0.0158097	0.382664	-3.08291	-3.10814	-3.01235	-3.03369	-3.07446	-3.09603	3.14937	2.11132	0.456188	0.358231	0.25626	0.665169	3.94615	2.86355	1.1931	2.56957
hsa-miR-579	2.43e-05	0.00023796	1.15066	-3.08291	-3.10814	-3.01235	-3.03369	-3.07446	-3.09603	-3.22205	-3.13428	-3.27834	-3.32109	-3.32191	-3.27732	-3.28825	-3.31458	-3.28764	-3.28542
hsa-miR-580	2.43e-05	0.00023796	1.15066	-3.08291	-3.10814	-3.01235	-3.03369	-3.07446	-3.09603	-3.22205	-3.13428	-3.27834	-3.32109	-3.32191	-3.27732	-3.28825	-3.31458	-3.28764	-3.28542
hsa-miR-581	2.43e-05	0.00023796	1.15066	-3.08291	-3.10814	-3.01235	-3.03369	-3.07446	-3.09603	-3.22205	-3.13428	-3.27834	-3.32109	-3.32191	-3.27732	-3.28825	-3.31458	-3.28764	-3.28542
hsa-miR-582-3p	2.43e-05	0.00023796	1.15066	-3.08291	-3.10814	-3.01235	-3.03369	-3.07446	-3.09603	-3.22205	-3.13428	-3.27834	-3.32109	-3.32191	-3.27732	-3.28825	-3.31458	-3.28764	-3.28542
hsa-miR-582-5p	2.43e-05	0.00023796	1.15066	-3.08291	-3.10814	-3.01235	-3.03369	-3.07446	-3.09603	-3.22205	-3.13428	-3.27834	-3.32109	-3.32191	-3.27732	-3.28825	-3.31458	-3.28764	-3.28542
hsa-miR-583	0.574975	0.84048	0.746436	-3.08291	-3.10814	-3.01235	-3.03369	-3.07446	-3.09603	-3.22205	-3.13428	-3.27834	-3.32109	-3.32191	-3.27732	-1.05899	-2.61018	-3.28764	-3.28542
hsa-miR-584-3p	2.43e-05	0.00023796	1.15066	-3.08291	-3.10814	-3.01235	-3.03369	-3.07446	-3.09603	-3.22205	-3.13428	-3.27834	-3.32109	-3.32191	-3.27732	-3.28825	-3.31458	-3.28764	-3.28542
hsa-miR-584-5p	0.869981	0.90769	1.10687	-3.08291	-3.10814	-3.01235	-3.03369	-3.07446	-3.09603	0.300676	-3.13428	-3.27834	-3.32109	-3.32191	-3.27732	-0.859996	-2.41823	-0.70035	-3.28542
hsa-miR-585	2.43e-05	0.00023796	1.15066	-3.08291	-3.10814	-3.01235	-3.03369	-3.07446	-3.09603	-3.22205	-3.13428	-3.27834	-3.32109	-3.32191	-3.27732	-3.28825	-3.31458	-3.28764	-3.28542
hsa-miR-586	2.43e-05	0.00023796	1.15066	-3.08291	-3.10814	-3.01235	-3.03369	-3.07446	-3.09603	-3.22205	-3.13428	-3.27834	-3.32109	-3.32191	-3.27732	-3.28825	-3.31458	-3.28764	-3.28542
hsa-miR-587	2.43e-05	0.00023796	1.15066	-3.08291	-3.10814	-3.01235	-3.03369	-3.07446	-3.09603	-3.22205	-3.13428	-3.27834	-3.32109	-3.32191	-3.27732	-3.28825	-3.31458	-3.28764	-3.28542
hsa-miR-588	2.43e-05	0.00023796	1.15066	-3.08291	-3.10814	-3.01235	-3.03369	-3.07446	-3.09603	-3.22205	-3.13428	-3.27834	-3.32109	-3.32191	-3.27732	-3.28825	-3.31458	-3.28764	-3.28542
hsa-miR-589-3p	2.43e-05	0.00023796	1.15066	-3.08291	-3.10814	-3.01235	-3.03369	-3.07446	-3.09603	-3.22205	-3.13428	-3.27834	-3.32109	-3.32191	-3.27732	-3.28825	-3.31458	-3.28764	-3.28542
hsa-miR-589-5p	2.43e-05	0.00023796	1.15066	-3.08291	-3.10814	-3.01235	-3.03369	-3.07446	-3.09603	-3.22205	-3.13428	-3.27834	-3.32109	-3.32191	-3.27732	-3.28825	-3.31458	-3.28764	-3.28542
hsa-miR-590-3p	2.43e-05	0.00023796	1.15066	-3.08291	-3.10814	-3.01235	-3.03369	-3.07446	-3.09603	-3.22205	-3.13428	-3.27834	-3.32109	-3.32191	-3.27732	-3.28825	-3.31458	-3.28764	-3.28542
hsa-miR-590-5p	0.728446	1	0.715048	-3.08291	-3.10814	-3.01235	-3.03369	-3.07446	-3.09603	-3.22205	-3.13428	-3.27834	-3.32109	-3.32191	-0.739123	-3.28825	-3.31458	-3.28764	-3.28542
hsa-miR-591	2.43e-05	0.00023796	1.15066	-3.08291	-3.10814	-3.01235	-3.03369	-3.07446	-3.09603	-3.22205	-3.13428	-3.27834	-3.32109	-3.32191	-3.27732	-3.28825	-3.31458	-3.28764	-3.28542
hsa-miR-592	2.43e-05	0.00023796	1.15066	-3.08291	-3.10814	-3.01235	-3.03369	-3.07446	-3.09603	-3.22205	-3.13428	-3.27834	-3.32109	-3.32191	-3.27732	-3.28825	-3.31458	-3.28764	-3.28542
hsa-miR-593-3p	2.43e-05	0.00023796	1.15066	-3.08291	-3.10814	-3.01235	-3.03369	-3.07446	-3.09603	-3.22205	-3.13428	-3.27834	-3.32109	-3.32191	-3.27732	-3.28825	-3.31458	-3.28764	-3.28542
hsa-miR-593-5p	2.43e-05	0.00023796	1.15066	-3.08291	-3.10814	-3.01235	-3.03369	-3.07446	-3.09603	-3.22205	-3.13428	-3.27834	-3.32109	-3.32191	-3.27732	-3.28825	-3.31458	-3.28764	-3.28542
hsa-miR-595	0.462721	0.581197	1.03824	-3.08291	-3.10814	-3.01235	-3.03369	-3.07446	-3.09603	-3.22205	-3.13428	-3.27834	-3.32109	-3.32191	-3.27732	-3.28825	-2.40615	-3.28764	-3.28542
hsa-miR-596	2.43e-05	0.00023796	1.15066	-3.08291	-3.10814	-3.01235	-3.03369	-3.07446	-3.09603	-3.22205	-3.13428	-3.27834	-3.32109	-3.32191	-3.27732	-3.28825	-3.31458	-3.28764	-3.28542
hsa-miR-597	2.43e-05	0.00023796	1.15066	-3.08291	-3.10814	-3.01235	-3.03369	-3.07446	-3.09603	-3.22205	-3.13428	-3.27834	-3.32109	-3.32191	-3.27732	-3.28825	-3.31458	-3.28764	-3.28542
hsa-miR-598	2.43e-05	0.00023796	1.15066	-3.08291	-3.10814	-3.01235	-3.03369	-3.07446	-3.09603	-3.22205	-3.13428	-3.27834	-3.32109	-3.32191	-3.27732	-3.28825	-3.31458	-3.28764	-3.28542
hsa-miR-599	2.43e-05	0.00023796	1.15066	-3.08291	-3.10814	-3.01235	-3.03369	-3.07446	-3.09603	-3.22205	-3.13428	-3.27834	-3.32109	-3.32191	-3.27732	-3.28825	-3.31458	-3.28764	-3.28542
hsa-miR-600	2.43e-05	0.00023796	1.15066	-3.08291	-3.10814	-3.01235	-3.03369	-3.07446	-3.09603	-3.22205	-3.13428	-3.27834	-3.32109	-3.32191	-3.27732	-3.28825	-3.31458	-3.28764	-3.28542
hsa-miR-601	0.217683	0.256819	0.489284	-3.08291	-3.10814	-3.01235	-3.03369	-3.07446	-3.09603	-3.22205	-3.13428	-3.27834	-3.32109	-3.32191	-3.27732	-0.649337	-2.36334	-0.801346	-3.28542
hsa-miR-602	2.43e-05	0.00023796	1.15066	-3.08291	-3.10814	-3.01235	-3.03369	-3.07446	-3.09603	-3.22205	-3.13428	-3.27834	-3.32109	-3.32191	-3.27732	-3.28825	-3.31458	-3.28764	-3.28542
hsa-miR-603	2.43e-05	0.00023796	1.15066	-3.08291	-3.10814	-3.01235	-3.03369	-3.07446	-3.09603	-3.22205	-3.13428	-3.27834	-3.32109	-3.32191	-3.27732	-3.28825	-3.31458	-3.28764	-3.28542
hsa-miR-604	2.43e-05	0.00023796	1.15066	-3.08291	-3.10814	-3.01235	-3.03369	-3.07446	-3.09603	-3.22205	-3.13428	-3.27834	-3.32109	-3.32191	-3.27732	-3.28825	-3.31458	-3.28764	-3.28542
hsa-miR-605	2.43e-05	0.00023796	1.15066	-3.08291	-3.10814	-3.01235	-3.03369	-3.07446	-3.09603	-3.22205	-3.13428	-3.27834	-3.32109	-3.32191	-3.27732	-3.28825	-3.31458	-3.28764	-3.28542
hsa-miR-606	2.43e-05	0.00023796	1.15066	-3.08291	-3.10814	-3.01235	-3.03369	-3.07446	-3.09603	-3.22205	-3.13428	-3.27834	-3.32109	-3.32191	-3.27732	-3.28825	-3.31458	-3.28764	-3.28542
hsa-miR-6068	0.000493853	0.00287241	0.149128	-3.08291	-3.10814	-3.01235	-3.03369	-3.07446	-3.09603	0.665169	1.08346	3.30968	1.08346	0.512673	0.373177	0.631801	2.54588	1.71325	2.07663
hsa-miR-6069	0.0642712	0.0532547	29.406	3.87116	2.86355	4.98395	5.02553	3.41867	-3.09603	-3.22205	-3.13428	-0.200924	-2.5128	-2.53561	-0.599926	-3.28825	-2.4158	-0.771228	-0.859996
hsa-miR-607	2.43e-05	0.00023796	1.15066	-3.08291	-3.10814	-3.01235	-3.03369	-3.07446	-3.09603	-3.22205	-3.13428	-3.27834	-3.32109	-3.32191	-3.27732	-3.28825	-3.31458	-3.28764	-3.28542
hsa-miR-6070	2.43e-05	0.00023796	1.15066	-3.08291	-3.10814	-3.01235	-3.03369	-3.07446	-3.09603	-3.22205	-3.13428	-3.27834	-3.32109	-3.32191	-3.27732	-3.28825	-3.31458	-3.28764	-3.28542
hsa-miR-6071	2.43e-05	0.00023796	1.15066	-3.08291	-3.10814	-3.01235	-3.03369	-3.07446	-3.09603	-3.22205	-3.13428	-3.27834	-3.32109	-3.32191	-3.27732	-3.28825	-3.31458	-3.28764	-3.28542
hsa-miR-6072	2.43e-05	0.00023796	1.15066	-3.08291	-3.10814	-3.01235	-3.03369	-3.07446	-3.09603	-3.22205	-3.13428	-3.27834	-3.32109	-3.32191	-3.27732	-3.28825	-3.31458	-3.28764	-3.28542
hsa-miR-6073	0.579463	0.612003	1.02385	-3.08291	-3.10814	-3.01235	-3.03369	-3.07446	-3.09603	-3.22205	-3.13428	-3.27834	-2.61417	-2.8618	-3.27732	-3.28825	-3.31458	-3.28764	-3.28542
hsa-miR-6074	2.43e-05	0.00023796	1.15066	-3.08291	-3.10814	-3.01235	-3.03369	-3.07446	-3.09603	-3.22205	-3.13428	-3.27834	-3.32109	-3.32191	-3.27732	-3.28825	-3.31458	-3.28764	-3.28542
hsa-miR-6075	0.272692	0.472494	0.511891	-3.08291	-3.10814	-3.01235	-3.03369	-3.07446	-3.09603	-3.22205	-3.13428	-0.649337	-2.90307	-3.32191	-3.27732	-3.28825	-0.867033	-3.28764	-3.28542
hsa-miR-6076	0.00866816	0.0113168	0.219295	-3.08291	-3.10814	-3.01235	-3.03369	4.16951	-3.09603	3.20967	2.94923	3.41867	3.23318	3.94615	0.631801	6.0381	4.0874	5.10015	3.02036
hsa-miR-6077	2.43e-05	0.00023796	1.15066	-3.08291	-3.10814	-3.01235	-3.03369	-3.07446	-3.09603	-3.22205	-3.13428	-3.27834	-3.32109	-3.32191	-3.27732	-3.28825	-3.31458	-3.28764	-3.28542
hsa-miR-6078	2.43e-05	0.00023796	1.15066	-3.08291	-3.10814	-3.01235	-3.03369	-3.07446	-3.09603	-3.22205	-3.13428	-3.27834	-3.32109	-3.32191	-3.27732	-3.28825	-3.31458	-3.28764	-3.28542
hsa-miR-6079	2.43e-05	0.00023796	1.15066	-3.08291	-3.10814	-3.01235	-3.03369	-3.07446	-3.09603	-3.22205	-3.13428	-3.27834	-3.32109	-3.32191	-3.27732	-3.28825	-3.31458	-3.28764	-3.28542
hsa-miR-608	2.43e-05	0.00023796	1.15066	-3.08291	-3.10814	-3.01235	-3.03369	-3.07446	-3.09603	-3.22205	-3.13428	-3.27834	-3.32109	-3.32191	-3.27732	-3.28825	-3.31458	-3.28764	-3.28542
hsa-miR-6080	2.43e-05	0.00023796	1.15066	-3.08291	-3.10814	-3.01235	-3.03369	-3.07446	-3.09603	-3.22205	-3.13428	-3.27834	-3.32109	-3.32191	-3.27732	-3.28825	-3.31458	-3.28764	-3.28542
hsa-miR-6081	2.43e-05	0.00023796	1.15066	-3.08291	-3.10814	-3.01235	-3.03369	-3.07446	-3.09603	-3.22205	-3.13428	-3.27834	-3.32109	-3.32191	-3.27732	-3.28825	-3.31458	-3.28764	-3.28542
hsa-miR-6082	2.43e-05	0.00023796	1.15066	-3.08291	-3.10814	-3.01235	-3.03369	-3.07446	-3.09603	-3.22205	-3.13428	-3.27834	-3.32109	-3.32191	-3.27732	-3.28825	-3.31458	-3.28764	-3.28542
hsa-miR-6083	2.43e-05	0.00023796	1.15066	-3.08291	-3.10814	-3.01235	-3.03369	-3.07446	-3.09603	-3.22205	-3.13428	-3.27834	-3.32109	-3.32191	-3.27732	-3.28825	-3.31458	-3.28764	-3.28542
hsa-miR-6084	2.43e-05	0.00023796	1.15066	-3.08291	-3.10814	-3.01235	-3.03369	-3.07446	-3.09603	-3.22205	-3.13428	-3.27834	-3.32109	-3.32191	-3.27732	-3.28825	-3.31458	-3.28764	-3.28542
hsa-miR-6085	0.0101471	0.0108184	0.408815	-3.08291	-3.10814	-3.01235	-3.03369	-3.07446	-3.09603	1.62399	1.36687	0.402063	0.160329	-0.0552746	-0.760021	1.32389	0.554514	1.68692	2.14251
hsa-miR-6086	0.0101075	0.00740819	0.275663	-3.08291	-3.10814	-3.01235	-3.03369	-3.07446	-3.09603	-3.22205	-3.13428	-3.27834	-2.41052	-0.636215	-3.27732	-1.10157	-0.260423	-1.13646	-0.725495
hsa-miR-6087	0.435134	0.46507	1.18792	6.92169	5.10015	-3.01235	-3.03369	5.10015	5.80537	6.25201	6.603	3.94615	3.94615	3.87116	3.87116	5.30778	6.92169	5.80537	6.25201
hsa-miR-6088	0.339489	0.42621	1.2099	3.23318	3.94615	-3.01235	-3.03369	3.60188	5.02553	5.80537	5.10015	2.94923	3.20967	3.56217	3.41867	4.35597	4.2657	4.35597	5.02553
hsa-miR-6089	0.258603	0.254878	0.809143	5.80537	6.0381	-3.01235	4.82129	6.25201	8.50142	6.92169	7.75402	6.92169	6.603	6.25201	6.25201	6.603	8.50142	7.29293	7.29293
hsa-miR-609	2.43e-05	0.00023796	1.15066	-3.08291	-3.10814	-3.01235	-3.03369	-3.07446	-3.09603	-3.22205	-3.13428	-3.27834	-3.32109	-3.32191	-3.27732	-3.28825	-3.31458	-3.28764	-3.28542
hsa-miR-6090	0.538049	0.668836	1.0568	6.25201	6.603	-3.01235	4.11598	7.75402	7.75402	8.50142	8.50142	5.53619	5.69761	5.30778	5.30778	8.50142	7.29293	8.50142	7.75402
hsa-miR-610	0.348137	0.404604	1.05335	-3.08291	-3.10814	-3.01235	-3.03369	-3.07446	-3.09603	-3.22205	-3.13428	-3.27834	-3.32109	-2.5128	-3.27732	-3.28825	-3.31458	-3.28764	-3.28542
hsa-miR-611	2.43e-05	0.00023796	1.15066	-3.08291	-3.10814	-3.01235	-3.03369	-3.07446	-3.09603	-3.22205	-3.13428	-3.27834	-3.32109	-3.32191	-3.27732	-3.28825	-3.31458	-3.28764	-3.28542
hsa-miR-612	2.43e-05	0.00023796	1.15066	-3.08291	-3.10814	-3.01235	-3.03369	-3.07446	-3.09603	-3.22205	-3.13428	-3.27834	-3.32109	-3.32191	-3.27732	-3.28825	-3.31458	-3.28764	-3.28542
hsa-miR-6124	0.0477565	0.0337722	0.702586	-3.08291	-3.10814	-3.01235	-3.03369	-3.07446	3.07327	1.71325	1.76003	0.25626	0.512673	1.16172	0.204696	2.07663	2.47753	1.69706	1.71325
hsa-miR-6125	0.0687211	0.0732854	0.580374	-3.08291	4.16951	-3.01235	-3.03369	3.20967	6.0381	5.30778	5.69761	6.25201	4.35597	4.35597	5.02553	4.0874	6.0381	5.53619	5.30778
hsa-miR-6126	0.0303654	0.0337722	0.529909	-3.08291	-3.10814	-3.01235	-3.03369	-3.07446	-3.09603	0.631801	-3.13428	-0.855729	-2.37031	-0.547165	-3.27732	-0.714654	0.25626	-0.78939	-0.801346
hsa-miR-6127	0.306251	0.254001	1.7399	-3.08291	5.69761	-3.01235	-3.03369	7.29293	5.69761	5.69761	6.0381	3.56217	4.82129	5.02553	4.2657	5.53619	3.23318	5.69761	4.16951
hsa-miR-6128	2.43e-05	0.00023796	1.15066	-3.08291	-3.10814	-3.01235	-3.03369	-3.07446	-3.09603	-3.22205	-3.13428	-3.27834	-3.32109	-3.32191	-3.27732	-3.28825	-3.31458	-3.28764	-3.28542
hsa-miR-6129	2.43e-05	0.00023796	1.15066	-3.08291	-3.10814	-3.01235	-3.03369	-3.07446	-3.09603	-3.22205	-3.13428	-3.27834	-3.32109	-3.32191	-3.27732	-3.28825	-3.31458	-3.28764	-3.28542
hsa-miR-613	2.43e-05	0.00023796	1.15066	-3.08291	-3.10814	-3.01235	-3.03369	-3.07446	-3.09603	-3.22205	-3.13428	-3.27834	-3.32109	-3.32191	-3.27732	-3.28825	-3.31458	-3.28764	-3.28542
hsa-miR-6130	2.43e-05	0.00023796	1.15066	-3.08291	-3.10814	-3.01235	-3.03369	-3.07446	-3.09603	-3.22205	-3.13428	-3.27834	-3.32109	-3.32191	-3.27732	-3.28825	-3.31458	-3.28764	-3.28542
hsa-miR-6131	2.43e-05	0.00023796	1.15066	-3.08291	-3.10814	-3.01235	-3.03369	-3.07446	-3.09603	-3.22205	-3.13428	-3.27834	-3.32109	-3.32191	-3.27732	-3.28825	-3.31458	-3.28764	-3.28542
hsa-miR-6132	2.43e-05	0.00023796	1.15066	-3.08291	-3.10814	-3.01235	-3.03369	-3.07446	-3.09603	-3.22205	-3.13428	-3.27834	-3.32109	-3.32191	-3.27732	-3.28825	-3.31458	-3.28764	-3.28542
hsa-miR-6133	0.334435	0.398265	1.05527	-3.08291	-3.10814	-3.01235	-3.03369	-3.07446	-3.09603	-3.22205	-3.13428	-3.27834	-3.32109	-3.32191	-3.27732	-3.28825	-2.52201	-3.28764	-3.28542
hsa-miR-6134	2.43e-05	0.00023796	1.15066	-3.08291	-3.10814	-3.01235	-3.03369	-3.07446	-3.09603	-3.22205	-3.13428	-3.27834	-3.32109	-3.32191	-3.27732	-3.28825	-3.31458	-3.28764	-3.28542
hsa-miR-614	2.43e-05	0.00023796	1.15066	-3.08291	-3.10814	-3.01235	-3.03369	-3.07446	-3.09603	-3.22205	-3.13428	-3.27834	-3.32109	-3.32191	-3.27732	-3.28825	-3.31458	-3.28764	-3.28542
hsa-miR-615-3p	2.43e-05	0.00023796	1.15066	-3.08291	-3.10814	-3.01235	-3.03369	-3.07446	-3.09603	-3.22205	-3.13428	-3.27834	-3.32109	-3.32191	-3.27732	-3.28825	-3.31458	-3.28764	-3.28542
hsa-miR-615-5p	2.43e-05	0.00023796	1.15066	-3.08291	-3.10814	-3.01235	-3.03369	-3.07446	-3.09603	-3.22205	-3.13428	-3.27834	-3.32109	-3.32191	-3.27732	-3.28825	-3.31458	-3.28764	-3.28542
hsa-miR-616-3p	2.43e-05	0.00023796	1.15066	-3.08291	-3.10814	-3.01235	-3.03369	-3.07446	-3.09603	-3.22205	-3.13428	-3.27834	-3.32109	-3.32191	-3.27732	-3.28825	-3.31458	-3.28764	-3.28542
hsa-miR-616-5p	2.43e-05	0.00023796	1.15066	-3.08291	-3.10814	-3.01235	-3.03369	-3.07446	-3.09603	-3.22205	-3.13428	-3.27834	-3.32109	-3.32191	-3.27732	-3.28825	-3.31458	-3.28764	-3.28542
hsa-miR-6165	0.200898	0.190656	1.34907	-3.08291	-3.10814	-3.01235	-3.03369	4.82129	3.56217	3.07327	3.07327	2.07663	1.68692	2.22739	0.402063	3.87116	2.07663	2.22739	2.47753
hsa-miR-617	2.43e-05	0.00023796	1.15066	-3.08291	-3.10814	-3.01235	-3.03369	-3.07446	-3.09603	-3.22205	-3.13428	-3.27834	-3.32109	-3.32191	-3.27732	-3.28825	-3.31458	-3.28764	-3.28542
hsa-miR-618	2.43e-05	0.00023796	1.15066	-3.08291	-3.10814	-3.01235	-3.03369	-3.07446	-3.09603	-3.22205	-3.13428	-3.27834	-3.32109	-3.32191	-3.27732	-3.28825	-3.31458	-3.28764	-3.28542
hsa-miR-619	2.43e-05	0.00023796	1.15066	-3.08291	-3.10814	-3.01235	-3.03369	-3.07446	-3.09603	-3.22205	-3.13428	-3.27834	-3.32109	-3.32191	-3.27732	-3.28825	-3.31458	-3.28764	-3.28542
hsa-miR-620	2.43e-05	0.00023796	1.15066	-3.08291	-3.10814	-3.01235	-3.03369	-3.07446	-3.09603	-3.22205	-3.13428	-3.27834	-3.32109	-3.32191	-3.27732	-3.28825	-3.31458	-3.28764	-3.28542
hsa-miR-621	2.43e-05	0.00023796	1.15066	-3.08291	-3.10814	-3.01235	-3.03369	-3.07446	-3.09603	-3.22205	-3.13428	-3.27834	-3.32109	-3.32191	-3.27732	-3.28825	-3.31458	-3.28764	-3.28542
hsa-miR-622	0.237511	0.258392	1.06769	-3.08291	-3.10814	-3.01235	-3.03369	-3.07446	-3.09603	-3.22205	-3.13428	-3.27834	-3.32109	-3.32191	-3.27732	-3.28825	-2.61018	-3.28764	-3.28542
hsa-miR-623	0.688908	0.840713	0.862283	-3.08291	-3.10814	-3.01235	-3.03369	-3.07446	-3.09603	-3.22205	-3.13428	-3.27834	-3.32109	-3.32191	-3.27732	-3.28825	-2.61018	-3.28764	-1.68241
hsa-miR-624-3p	2.43e-05	0.00023796	1.15066	-3.08291	-3.10814	-3.01235	-3.03369	-3.07446	-3.09603	-3.22205	-3.13428	-3.27834	-3.32109	-3.32191	-3.27732	-3.28825	-3.31458	-3.28764	-3.28542
hsa-miR-624-5p	2.43e-05	0.00023796	1.15066	-3.08291	-3.10814	-3.01235	-3.03369	-3.07446	-3.09603	-3.22205	-3.13428	-3.27834	-3.32109	-3.32191	-3.27732	-3.28825	-3.31458	-3.28764	-3.28542
hsa-miR-625-3p	2.43e-05	0.00023796	1.15066	-3.08291	-3.10814	-3.01235	-3.03369	-3.07446	-3.09603	-3.22205	-3.13428	-3.27834	-3.32109	-3.32191	-3.27732	-3.28825	-3.31458	-3.28764	-3.28542
hsa-miR-625-5p	2.43e-05	0.00023796	1.15066	-3.08291	-3.10814	-3.01235	-3.03369	-3.07446	-3.09603	-3.22205	-3.13428	-3.27834	-3.32109	-3.32191	-3.27732	-3.28825	-3.31458	-3.28764	-3.28542
hsa-miR-626	2.43e-05	0.00023796	1.15066	-3.08291	-3.10814	-3.01235	-3.03369	-3.07446	-3.09603	-3.22205	-3.13428	-3.27834	-3.32109	-3.32191	-3.27732	-3.28825	-3.31458	-3.28764	-3.28542
hsa-miR-627	2.43e-05	0.00023796	1.15066	-3.08291	-3.10814	-3.01235	-3.03369	-3.07446	-3.09603	-3.22205	-3.13428	-3.27834	-3.32109	-3.32191	-3.27732	-3.28825	-3.31458	-3.28764	-3.28542
hsa-miR-628-3p	2.43e-05	0.00023796	1.15066	-3.08291	-3.10814	-3.01235	-3.03369	-3.07446	-3.09603	-3.22205	-3.13428	-3.27834	-3.32109	-3.32191	-3.27732	-3.28825	-3.31458	-3.28764	-3.28542
hsa-miR-628-5p	2.43e-05	0.00023796	1.15066	-3.08291	-3.10814	-3.01235	-3.03369	-3.07446	-3.09603	-3.22205	-3.13428	-3.27834	-3.32109	-3.32191	-3.27732	-3.28825	-3.31458	-3.28764	-3.28542
hsa-miR-629-3p	2.43e-05	0.00023796	1.15066	-3.08291	-3.10814	-3.01235	-3.03369	-3.07446	-3.09603	-3.22205	-3.13428	-3.27834	-3.32109	-3.32191	-3.27732	-3.28825	-3.31458	-3.28764	-3.28542
hsa-miR-629-5p	2.43e-05	0.00023796	1.15066	-3.08291	-3.10814	-3.01235	-3.03369	-3.07446	-3.09603	-3.22205	-3.13428	-3.27834	-3.32109	-3.32191	-3.27732	-3.28825	-3.31458	-3.28764	-3.28542
hsa-miR-630	0.00241513	0.00791538	0.216442	-3.08291	-3.10814	-3.01235	-3.03369	-3.07446	-3.09603	0.160329	-3.13428	0.217976	0.0300821	-0.897512	-3.27732	1.08346	1.16172	-0.725495	0.276023
hsa-miR-631	2.43e-05	0.00023796	1.15066	-3.08291	-3.10814	-3.01235	-3.03369	-3.07446	-3.09603	-3.22205	-3.13428	-3.27834	-3.32109	-3.32191	-3.27732	-3.28825	-3.31458	-3.28764	-3.28542
hsa-miR-632	2.43e-05	0.00023796	1.15066	-3.08291	-3.10814	-3.01235	-3.03369	-3.07446	-3.09603	-3.22205	-3.13428	-3.27834	-3.32109	-3.32191	-3.27732	-3.28825	-3.31458	-3.28764	-3.28542
hsa-miR-633	2.43e-05	0.00023796	1.15066	-3.08291	-3.10814	-3.01235	-3.03369	-3.07446	-3.09603	-3.22205	-3.13428	-3.27834	-3.32109	-3.32191	-3.27732	-3.28825	-3.31458	-3.28764	-3.28542
hsa-miR-634	2.43e-05	0.00023796	1.15066	-3.08291	-3.10814	-3.01235	-3.03369	-3.07446	-3.09603	-3.22205	-3.13428	-3.27834	-3.32109	-3.32191	-3.27732	-3.28825	-3.31458	-3.28764	-3.28542
hsa-miR-635	2.43e-05	0.00023796	1.15066	-3.08291	-3.10814	-3.01235	-3.03369	-3.07446	-3.09603	-3.22205	-3.13428	-3.27834	-3.32109	-3.32191	-3.27732	-3.28825	-3.31458	-3.28764	-3.28542
hsa-miR-636	0.20651	0.191252	1.06037	-3.08291	-3.10814	-3.01235	-3.03369	-3.07446	-3.09603	-3.22205	-3.13428	-3.27834	-2.88222	-2.90238	-3.27732	-3.28825	-3.31458	-3.28764	-3.28542
hsa-miR-637	2.43e-05	0.00023796	1.15066	-3.08291	-3.10814	-3.01235	-3.03369	-3.07446	-3.09603	-3.22205	-3.13428	-3.27834	-3.32109	-3.32191	-3.27732	-3.28825	-3.31458	-3.28764	-3.28542
hsa-miR-638	0.0110525	0.0139927	0.355356	-3.08291	-3.10814	-3.01235	-3.03369	-3.07446	2.94923	2.8269	3.94615	4.2657	3.14937	2.11132	2.86355	2.14251	3.94615	3.94615	3.56217
hsa-miR-639	2.43e-05	0.00023796	1.15066	-3.08291	-3.10814	-3.01235	-3.03369	-3.07446	-3.09603	-3.22205	-3.13428	-3.27834	-3.32109	-3.32191	-3.27732	-3.28825	-3.31458	-3.28764	-3.28542
hsa-miR-640	2.43e-05	0.00023796	1.15066	-3.08291	-3.10814	-3.01235	-3.03369	-3.07446	-3.09603	-3.22205	-3.13428	-3.27834	-3.32109	-3.32191	-3.27732	-3.28825	-3.31458	-3.28764	-3.28542
hsa-miR-641	2.43e-05	0.00023796	1.15066	-3.08291	-3.10814	-3.01235	-3.03369	-3.07446	-3.09603	-3.22205	-3.13428	-3.27834	-3.32109	-3.32191	-3.27732	-3.28825	-3.31458	-3.28764	-3.28542
hsa-miR-642a-3p	0.0778093	0.0791813	0.482656	-3.08291	-3.10814	-3.01235	-3.03369	4.35597	2.86355	3.30968	3.56217	0.999929	1.16172	0.665169	3.94615	4.66501	4.82129	3.23318	4.2657
hsa-miR-642a-5p	2.43e-05	0.00023796	1.15066	-3.08291	-3.10814	-3.01235	-3.03369	-3.07446	-3.09603	-3.22205	-3.13428	-3.27834	-3.32109	-3.32191	-3.27732	-3.28825	-3.31458	-3.28764	-3.28542
hsa-miR-642b-3p	0.111147	0.100083	2.33642	-3.08291	-3.10814	-3.01235	-3.03369	-3.07446	-3.09603	0.184418	4.35597	0.512673	-0.78939	-1.63667	-0.135097	1.11159	0.419577	0.512673	0.479904
hsa-miR-642b-5p	2.43e-05	0.00023796	1.15066	-3.08291	-3.10814	-3.01235	-3.03369	-3.07446	-3.09603	-3.22205	-3.13428	-3.27834	-3.32109	-3.32191	-3.27732	-3.28825	-3.31458	-3.28764	-3.28542
hsa-miR-643	2.43e-05	0.00023796	1.15066	-3.08291	-3.10814	-3.01235	-3.03369	-3.07446	-3.09603	-3.22205	-3.13428	-3.27834	-3.32109	-3.32191	-3.27732	-3.28825	-3.31458	-3.28764	-3.28542
hsa-miR-644a	2.43e-05	0.00023796	1.15066	-3.08291	-3.10814	-3.01235	-3.03369	-3.07446	-3.09603	-3.22205	-3.13428	-3.27834	-3.32109	-3.32191	-3.27732	-3.28825	-3.31458	-3.28764	-3.28542
hsa-miR-645	2.43e-05	0.00023796	1.15066	-3.08291	-3.10814	-3.01235	-3.03369	-3.07446	-3.09603	-3.22205	-3.13428	-3.27834	-3.32109	-3.32191	-3.27732	-3.28825	-3.31458	-3.28764	-3.28542
hsa-miR-646	2.43e-05	0.00023796	1.15066	-3.08291	-3.10814	-3.01235	-3.03369	-3.07446	-3.09603	-3.22205	-3.13428	-3.27834	-3.32109	-3.32191	-3.27732	-3.28825	-3.31458	-3.28764	-3.28542
hsa-miR-647	2.43e-05	0.00023796	1.15066	-3.08291	-3.10814	-3.01235	-3.03369	-3.07446	-3.09603	-3.22205	-3.13428	-3.27834	-3.32109	-3.32191	-3.27732	-3.28825	-3.31458	-3.28764	-3.28542
hsa-miR-648	2.43e-05	0.00023796	1.15066	-3.08291	-3.10814	-3.01235	-3.03369	-3.07446	-3.09603	-3.22205	-3.13428	-3.27834	-3.32109	-3.32191	-3.27732	-3.28825	-3.31458	-3.28764	-3.28542
hsa-miR-649	2.43e-05	0.00023796	1.15066	-3.08291	-3.10814	-3.01235	-3.03369	-3.07446	-3.09603	-3.22205	-3.13428	-3.27834	-3.32109	-3.32191	-3.27732	-3.28825	-3.31458	-3.28764	-3.28542
hsa-miR-6499-3p	2.43e-05	0.00023796	1.15066	-3.08291	-3.10814	-3.01235	-3.03369	-3.07446	-3.09603	-3.22205	-3.13428	-3.27834	-3.32109	-3.32191	-3.27732	-3.28825	-3.31458	-3.28764	-3.28542
hsa-miR-6499-5p	2.43e-05	0.00023796	1.15066	-3.08291	-3.10814	-3.01235	-3.03369	-3.07446	-3.09603	-3.22205	-3.13428	-3.27834	-3.32109	-3.32191	-3.27732	-3.28825	-3.31458	-3.28764	-3.28542
hsa-miR-650	2.43e-05	0.00023796	1.15066	-3.08291	-3.10814	-3.01235	-3.03369	-3.07446	-3.09603	-3.22205	-3.13428	-3.27834	-3.32109	-3.32191	-3.27732	-3.28825	-3.31458	-3.28764	-3.28542
hsa-miR-6500-3p	2.43e-05	0.00023796	1.15066	-3.08291	-3.10814	-3.01235	-3.03369	-3.07446	-3.09603	-3.22205	-3.13428	-3.27834	-3.32109	-3.32191	-3.27732	-3.28825	-3.31458	-3.28764	-3.28542
hsa-miR-6500-5p	2.43e-05	0.00023796	1.15066	-3.08291	-3.10814	-3.01235	-3.03369	-3.07446	-3.09603	-3.22205	-3.13428	-3.27834	-3.32109	-3.32191	-3.27732	-3.28825	-3.31458	-3.28764	-3.28542
hsa-miR-6501-3p	2.43e-05	0.00023796	1.15066	-3.08291	-3.10814	-3.01235	-3.03369	-3.07446	-3.09603	-3.22205	-3.13428	-3.27834	-3.32109	-3.32191	-3.27732	-3.28825	-3.31458	-3.28764	-3.28542
hsa-miR-6501-5p	2.43e-05	0.00023796	1.15066	-3.08291	-3.10814	-3.01235	-3.03369	-3.07446	-3.09603	-3.22205	-3.13428	-3.27834	-3.32109	-3.32191	-3.27732	-3.28825	-3.31458	-3.28764	-3.28542
hsa-miR-6502-3p	2.43e-05	0.00023796	1.15066	-3.08291	-3.10814	-3.01235	-3.03369	-3.07446	-3.09603	-3.22205	-3.13428	-3.27834	-3.32109	-3.32191	-3.27732	-3.28825	-3.31458	-3.28764	-3.28542
hsa-miR-6502-5p	2.43e-05	0.00023796	1.15066	-3.08291	-3.10814	-3.01235	-3.03369	-3.07446	-3.09603	-3.22205	-3.13428	-3.27834	-3.32109	-3.32191	-3.27732	-3.28825	-3.31458	-3.28764	-3.28542
hsa-miR-6503-3p	2.43e-05	0.00023796	1.15066	-3.08291	-3.10814	-3.01235	-3.03369	-3.07446	-3.09603	-3.22205	-3.13428	-3.27834	-3.32109	-3.32191	-3.27732	-3.28825	-3.31458	-3.28764	-3.28542
hsa-miR-6503-5p	2.43e-05	0.00023796	1.15066	-3.08291	-3.10814	-3.01235	-3.03369	-3.07446	-3.09603	-3.22205	-3.13428	-3.27834	-3.32109	-3.32191	-3.27732	-3.28825	-3.31458	-3.28764	-3.28542
hsa-miR-6504-3p	2.43e-05	0.00023796	1.15066	-3.08291	-3.10814	-3.01235	-3.03369	-3.07446	-3.09603	-3.22205	-3.13428	-3.27834	-3.32109	-3.32191	-3.27732	-3.28825	-3.31458	-3.28764	-3.28542
hsa-miR-6504-5p	2.43e-05	0.00023796	1.15066	-3.08291	-3.10814	-3.01235	-3.03369	-3.07446	-3.09603	-3.22205	-3.13428	-3.27834	-3.32109	-3.32191	-3.27732	-3.28825	-3.31458	-3.28764	-3.28542
hsa-miR-6505-3p	2.43e-05	0.00023796	1.15066	-3.08291	-3.10814	-3.01235	-3.03369	-3.07446	-3.09603	-3.22205	-3.13428	-3.27834	-3.32109	-3.32191	-3.27732	-3.28825	-3.31458	-3.28764	-3.28542
hsa-miR-6505-5p	2.43e-05	0.00023796	1.15066	-3.08291	-3.10814	-3.01235	-3.03369	-3.07446	-3.09603	-3.22205	-3.13428	-3.27834	-3.32109	-3.32191	-3.27732	-3.28825	-3.31458	-3.28764	-3.28542
hsa-miR-6506-3p	2.43e-05	0.00023796	1.15066	-3.08291	-3.10814	-3.01235	-3.03369	-3.07446	-3.09603	-3.22205	-3.13428	-3.27834	-3.32109	-3.32191	-3.27732	-3.28825	-3.31458	-3.28764	-3.28542
hsa-miR-6506-5p	2.43e-05	0.00023796	1.15066	-3.08291	-3.10814	-3.01235	-3.03369	-3.07446	-3.09603	-3.22205	-3.13428	-3.27834	-3.32109	-3.32191	-3.27732	-3.28825	-3.31458	-3.28764	-3.28542
hsa-miR-6507-3p	2.43e-05	0.00023796	1.15066	-3.08291	-3.10814	-3.01235	-3.03369	-3.07446	-3.09603	-3.22205	-3.13428	-3.27834	-3.32109	-3.32191	-3.27732	-3.28825	-3.31458	-3.28764	-3.28542
hsa-miR-6507-5p	2.43e-05	0.00023796	1.15066	-3.08291	-3.10814	-3.01235	-3.03369	-3.07446	-3.09603	-3.22205	-3.13428	-3.27834	-3.32109	-3.32191	-3.27732	-3.28825	-3.31458	-3.28764	-3.28542
hsa-miR-6508-3p	2.43e-05	0.00023796	1.15066	-3.08291	-3.10814	-3.01235	-3.03369	-3.07446	-3.09603	-3.22205	-3.13428	-3.27834	-3.32109	-3.32191	-3.27732	-3.28825	-3.31458	-3.28764	-3.28542
hsa-miR-6508-5p	0.0929496	0.082276	28.2903	3.20967	2.54588	-3.01235	4.11598	-3.07446	-3.09603	-3.22205	-3.13428	-1.13343	-3.32109	-3.32191	-3.27732	-3.28825	-3.31458	-3.28764	-3.28542
hsa-miR-6509-3p	2.43e-05	0.00023796	1.15066	-3.08291	-3.10814	-3.01235	-3.03369	-3.07446	-3.09603	-3.22205	-3.13428	-3.27834	-3.32109	-3.32191	-3.27732	-3.28825	-3.31458	-3.28764	-3.28542
hsa-miR-6509-5p	2.43e-05	0.00023796	1.15066	-3.08291	-3.10814	-3.01235	-3.03369	-3.07446	-3.09603	-3.22205	-3.13428	-3.27834	-3.32109	-3.32191	-3.27732	-3.28825	-3.31458	-3.28764	-3.28542
hsa-miR-651	2.43e-05	0.00023796	1.15066	-3.08291	-3.10814	-3.01235	-3.03369	-3.07446	-3.09603	-3.22205	-3.13428	-3.27834	-3.32109	-3.32191	-3.27732	-3.28825	-3.31458	-3.28764	-3.28542
hsa-miR-6510-3p	2.43e-05	0.00023796	1.15066	-3.08291	-3.10814	-3.01235	-3.03369	-3.07446	-3.09603	-3.22205	-3.13428	-3.27834	-3.32109	-3.32191	-3.27732	-3.28825	-3.31458	-3.28764	-3.28542
hsa-miR-6510-5p	0.0663208	0.0470121	0.868333	-3.08291	-3.10814	-3.01235	-3.03369	-3.07446	2.22739	0.999929	2.56957	1.08346	0.479904	0.333962	0.184418	1.76003	1.26137	0.592514	1.0139
hsa-miR-6511a-3p	2.43e-05	0.00023796	1.15066	-3.08291	-3.10814	-3.01235	-3.03369	-3.07446	-3.09603	-3.22205	-3.13428	-3.27834	-3.32109	-3.32191	-3.27732	-3.28825	-3.31458	-3.28764	-3.28542
hsa-miR-6511a-5p	2.43e-05	0.00023796	1.15066	-3.08291	-3.10814	-3.01235	-3.03369	-3.07446	-3.09603	-3.22205	-3.13428	-3.27834	-3.32109	-3.32191	-3.27732	-3.28825	-3.31458	-3.28764	-3.28542
hsa-miR-6511b-3p	2.43e-05	0.00023796	1.15066	-3.08291	-3.10814	-3.01235	-3.03369	-3.07446	-3.09603	-3.22205	-3.13428	-3.27834	-3.32109	-3.32191	-3.27732	-3.28825	-3.31458	-3.28764	-3.28542
hsa-miR-6511b-5p	2.43e-05	0.00023796	1.15066	-3.08291	-3.10814	-3.01235	-3.03369	-3.07446	-3.09603	-3.22205	-3.13428	-3.27834	-3.32109	-3.32191	-3.27732	-3.28825	-3.31458	-3.28764	-3.28542
hsa-miR-6512-3p	2.43e-05	0.00023796	1.15066	-3.08291	-3.10814	-3.01235	-3.03369	-3.07446	-3.09603	-3.22205	-3.13428	-3.27834	-3.32109	-3.32191	-3.27732	-3.28825	-3.31458	-3.28764	-3.28542
hsa-miR-6512-5p	2.43e-05	0.00023796	1.15066	-3.08291	-3.10814	-3.01235	-3.03369	-3.07446	-3.09603	-3.22205	-3.13428	-3.27834	-3.32109	-3.32191	-3.27732	-3.28825	-3.31458	-3.28764	-3.28542
hsa-miR-6513-3p	2.43e-05	0.00023796	1.15066	-3.08291	-3.10814	-3.01235	-3.03369	-3.07446	-3.09603	-3.22205	-3.13428	-3.27834	-3.32109	-3.32191	-3.27732	-3.28825	-3.31458	-3.28764	-3.28542
hsa-miR-6513-5p	2.43e-05	0.00023796	1.15066	-3.08291	-3.10814	-3.01235	-3.03369	-3.07446	-3.09603	-3.22205	-3.13428	-3.27834	-3.32109	-3.32191	-3.27732	-3.28825	-3.31458	-3.28764	-3.28542
hsa-miR-6514-3p	2.43e-05	0.00023796	1.15066	-3.08291	-3.10814	-3.01235	-3.03369	-3.07446	-3.09603	-3.22205	-3.13428	-3.27834	-3.32109	-3.32191	-3.27732	-3.28825	-3.31458	-3.28764	-3.28542
hsa-miR-6514-5p	2.43e-05	0.00023796	1.15066	-3.08291	-3.10814	-3.01235	-3.03369	-3.07446	-3.09603	-3.22205	-3.13428	-3.27834	-3.32109	-3.32191	-3.27732	-3.28825	-3.31458	-3.28764	-3.28542
hsa-miR-6515-3p	0.0247428	0.0172694	59.6714	3.50579	2.22739	4.98395	5.10015	-3.07446	-3.09603	0.135307	-3.13428	-1.13343	-3.32109	-3.32191	-3.27732	-3.28825	-3.31458	-3.28764	-1.58227
hsa-miR-6515-5p	0.827818	0.873049	1.09456	-3.08291	-3.10814	-3.01235	-3.03369	-3.07446	-3.09603	0.0787163	-3.13428	-3.27834	-2.90307	-3.32191	-3.27732	-1.00494	-2.4444	-1.00494	-3.28542
hsa-miR-652-3p	2.43e-05	0.00023796	1.15066	-3.08291	-3.10814	-3.01235	-3.03369	-3.07446	-3.09603	-3.22205	-3.13428	-3.27834	-3.32109	-3.32191	-3.27732	-3.28825	-3.31458	-3.28764	-3.28542
hsa-miR-652-5p	2.43e-05	0.00023796	1.15066	-3.08291	-3.10814	-3.01235	-3.03369	-3.07446	-3.09603	-3.22205	-3.13428	-3.27834	-3.32109	-3.32191	-3.27732	-3.28825	-3.31458	-3.28764	-3.28542
hsa-miR-653	2.43e-05	0.00023796	1.15066	-3.08291	-3.10814	-3.01235	-3.03369	-3.07446	-3.09603	-3.22205	-3.13428	-3.27834	-3.32109	-3.32191	-3.27732	-3.28825	-3.31458	-3.28764	-3.28542
hsa-miR-654-3p	2.43e-05	0.00023796	1.15066	-3.08291	-3.10814	-3.01235	-3.03369	-3.07446	-3.09603	-3.22205	-3.13428	-3.27834	-3.32109	-3.32191	-3.27732	-3.28825	-3.31458	-3.28764	-3.28542
hsa-miR-654-5p	2.43e-05	0.00023796	1.15066	-3.08291	-3.10814	-3.01235	-3.03369	-3.07446	-3.09603	-3.22205	-3.13428	-3.27834	-3.32109	-3.32191	-3.27732	-3.28825	-3.31458	-3.28764	-3.28542
hsa-miR-655	2.43e-05	0.00023796	1.15066	-3.08291	-3.10814	-3.01235	-3.03369	-3.07446	-3.09603	-3.22205	-3.13428	-3.27834	-3.32109	-3.32191	-3.27732	-3.28825	-3.31458	-3.28764	-3.28542
hsa-miR-656	2.43e-05	0.00023796	1.15066	-3.08291	-3.10814	-3.01235	-3.03369	-3.07446	-3.09603	-3.22205	-3.13428	-3.27834	-3.32109	-3.32191	-3.27732	-3.28825	-3.31458	-3.28764	-3.28542
hsa-miR-657	2.43e-05	0.00023796	1.15066	-3.08291	-3.10814	-3.01235	-3.03369	-3.07446	-3.09603	-3.22205	-3.13428	-3.27834	-3.32109	-3.32191	-3.27732	-3.28825	-3.31458	-3.28764	-3.28542
hsa-miR-658	2.43e-05	0.00023796	1.15066	-3.08291	-3.10814	-3.01235	-3.03369	-3.07446	-3.09603	-3.22205	-3.13428	-3.27834	-3.32109	-3.32191	-3.27732	-3.28825	-3.31458	-3.28764	-3.28542
hsa-miR-659-3p	2.43e-05	0.00023796	1.15066	-3.08291	-3.10814	-3.01235	-3.03369	-3.07446	-3.09603	-3.22205	-3.13428	-3.27834	-3.32109	-3.32191	-3.27732	-3.28825	-3.31458	-3.28764	-3.28542
hsa-miR-659-5p	2.43e-05	0.00023796	1.15066	-3.08291	-3.10814	-3.01235	-3.03369	-3.07446	-3.09603	-3.22205	-3.13428	-3.27834	-3.32109	-3.32191	-3.27732	-3.28825	-3.31458	-3.28764	-3.28542
hsa-miR-660-3p	2.43e-05	0.00023796	1.15066	-3.08291	-3.10814	-3.01235	-3.03369	-3.07446	-3.09603	-3.22205	-3.13428	-3.27834	-3.32109	-3.32191	-3.27732	-3.28825	-3.31458	-3.28764	-3.28542
hsa-miR-660-5p	2.43e-05	0.00023796	1.15066	-3.08291	-3.10814	-3.01235	-3.03369	-3.07446	-3.09603	-3.22205	-3.13428	-3.27834	-3.32109	-3.32191	-3.27732	-3.28825	-3.31458	-3.28764	-3.28542
hsa-miR-661	2.43e-05	0.00023796	1.15066	-3.08291	-3.10814	-3.01235	-3.03369	-3.07446	-3.09603	-3.22205	-3.13428	-3.27834	-3.32109	-3.32191	-3.27732	-3.28825	-3.31458	-3.28764	-3.28542
hsa-miR-662	2.43e-05	0.00023796	1.15066	-3.08291	-3.10814	-3.01235	-3.03369	-3.07446	-3.09603	-3.22205	-3.13428	-3.27834	-3.32109	-3.32191	-3.27732	-3.28825	-3.31458	-3.28764	-3.28542
hsa-miR-663a	0.0363097	0.0295334	0.104538	-3.08291	-3.10814	-3.01235	-3.03369	-3.07446	-3.09603	-3.22205	-3.13428	-3.27834	-3.32109	-2.43445	-3.27732	1.36687	0.241488	1.76003	0.402063
hsa-miR-663b	2.43e-05	0.00023796	1.15066	-3.08291	-3.10814	-3.01235	-3.03369	-3.07446	-3.09603	-3.22205	-3.13428	-3.27834	-3.32109	-3.32191	-3.27732	-3.28825	-3.31458	-3.28764	-3.28542
hsa-miR-664a-3p	2.43e-05	0.00023796	1.15066	-3.08291	-3.10814	-3.01235	-3.03369	-3.07446	-3.09603	-3.22205	-3.13428	-3.27834	-3.32109	-3.32191	-3.27732	-3.28825	-3.31458	-3.28764	-3.28542
hsa-miR-664a-5p	2.43e-05	0.00023796	1.15066	-3.08291	-3.10814	-3.01235	-3.03369	-3.07446	-3.09603	-3.22205	-3.13428	-3.27834	-3.32109	-3.32191	-3.27732	-3.28825	-3.31458	-3.28764	-3.28542
hsa-miR-664b-3p	2.43e-05	0.00023796	1.15066	-3.08291	-3.10814	-3.01235	-3.03369	-3.07446	-3.09603	-3.22205	-3.13428	-3.27834	-3.32109	-3.32191	-3.27732	-3.28825	-3.31458	-3.28764	-3.28542
hsa-miR-664b-5p	2.43e-05	0.00023796	1.15066	-3.08291	-3.10814	-3.01235	-3.03369	-3.07446	-3.09603	-3.22205	-3.13428	-3.27834	-3.32109	-3.32191	-3.27732	-3.28825	-3.31458	-3.28764	-3.28542
hsa-miR-665	2.43e-05	0.00023796	1.15066	-3.08291	-3.10814	-3.01235	-3.03369	-3.07446	-3.09603	-3.22205	-3.13428	-3.27834	-3.32109	-3.32191	-3.27732	-3.28825	-3.31458	-3.28764	-3.28542
hsa-miR-668	2.43e-05	0.00023796	1.15066	-3.08291	-3.10814	-3.01235	-3.03369	-3.07446	-3.09603	-3.22205	-3.13428	-3.27834	-3.32109	-3.32191	-3.27732	-3.28825	-3.31458	-3.28764	-3.28542
hsa-miR-670	2.43e-05	0.00023796	1.15066	-3.08291	-3.10814	-3.01235	-3.03369	-3.07446	-3.09603	-3.22205	-3.13428	-3.27834	-3.32109	-3.32191	-3.27732	-3.28825	-3.31458	-3.28764	-3.28542
hsa-miR-671-3p	2.43e-05	0.00023796	1.15066	-3.08291	-3.10814	-3.01235	-3.03369	-3.07446	-3.09603	-3.22205	-3.13428	-3.27834	-3.32109	-3.32191	-3.27732	-3.28825	-3.31458	-3.28764	-3.28542
hsa-miR-671-5p	0.247343	0.25091	1.50836	-3.08291	-3.10814	-3.01235	-3.03369	5.02553	2.56957	4.2657	3.23318	2.0349	1.32389	2.94923	-1.00494	3.30968	3.07327	2.54588	2.54588
hsa-miR-6715a-3p	2.43e-05	0.00023796	1.15066	-3.08291	-3.10814	-3.01235	-3.03369	-3.07446	-3.09603	-3.22205	-3.13428	-3.27834	-3.32109	-3.32191	-3.27732	-3.28825	-3.31458	-3.28764	-3.28542
hsa-miR-6715b-3p	2.43e-05	0.00023796	1.15066	-3.08291	-3.10814	-3.01235	-3.03369	-3.07446	-3.09603	-3.22205	-3.13428	-3.27834	-3.32109	-3.32191	-3.27732	-3.28825	-3.31458	-3.28764	-3.28542
hsa-miR-6715b-5p	2.43e-05	0.00023796	1.15066	-3.08291	-3.10814	-3.01235	-3.03369	-3.07446	-3.09603	-3.22205	-3.13428	-3.27834	-3.32109	-3.32191	-3.27732	-3.28825	-3.31458	-3.28764	-3.28542
hsa-miR-6716-3p	2.43e-05	0.00023796	1.15066	-3.08291	-3.10814	-3.01235	-3.03369	-3.07446	-3.09603	-3.22205	-3.13428	-3.27834	-3.32109	-3.32191	-3.27732	-3.28825	-3.31458	-3.28764	-3.28542
hsa-miR-6716-5p	2.43e-05	0.00023796	1.15066	-3.08291	-3.10814	-3.01235	-3.03369	-3.07446	-3.09603	-3.22205	-3.13428	-3.27834	-3.32109	-3.32191	-3.27732	-3.28825	-3.31458	-3.28764	-3.28542
hsa-miR-6717-5p	2.43e-05	0.00023796	1.15066	-3.08291	-3.10814	-3.01235	-3.03369	-3.07446	-3.09603	-3.22205	-3.13428	-3.27834	-3.32109	-3.32191	-3.27732	-3.28825	-3.31458	-3.28764	-3.28542
hsa-miR-6718-5p	2.43e-05	0.00023796	1.15066	-3.08291	-3.10814	-3.01235	-3.03369	-3.07446	-3.09603	-3.22205	-3.13428	-3.27834	-3.32109	-3.32191	-3.27732	-3.28825	-3.31458	-3.28764	-3.28542
hsa-miR-6719-3p	2.43e-05	0.00023796	1.15066	-3.08291	-3.10814	-3.01235	-3.03369	-3.07446	-3.09603	-3.22205	-3.13428	-3.27834	-3.32109	-3.32191	-3.27732	-3.28825	-3.31458	-3.28764	-3.28542
hsa-miR-6720-3p	2.43e-05	0.00023796	1.15066	-3.08291	-3.10814	-3.01235	-3.03369	-3.07446	-3.09603	-3.22205	-3.13428	-3.27834	-3.32109	-3.32191	-3.27732	-3.28825	-3.31458	-3.28764	-3.28542
hsa-miR-6721-5p	2.43e-05	0.00023796	1.15066	-3.08291	-3.10814	-3.01235	-3.03369	-3.07446	-3.09603	-3.22205	-3.13428	-3.27834	-3.32109	-3.32191	-3.27732	-3.28825	-3.31458	-3.28764	-3.28542
hsa-miR-6722-3p	0.0261552	0.0440602	0.361084	-3.08291	-3.10814	-3.01235	-3.03369	-3.07446	-3.09603	0.0300821	-3.13428	-3.27834	-0.859996	-1.11382	-3.27732	-0.52384	-0.0352333	0.135307	0.184418
hsa-miR-6722-5p	2.43e-05	0.00023796	1.15066	-3.08291	-3.10814	-3.01235	-3.03369	-3.07446	-3.09603	-3.22205	-3.13428	-3.27834	-3.32109	-3.32191	-3.27732	-3.28825	-3.31458	-3.28764	-3.28542
hsa-miR-6723-5p	0.0322302	0.00740819	0.345312	-3.08291	-3.10814	-3.01235	-3.03369	-3.07446	-3.09603	-3.22205	-3.13428	-3.27834	-2.52201	-2.38936	-3.27732	-0.78939	-2.5395	-0.52384	-0.52384
hsa-miR-6724-5p	0.0606129	0.0385337	0.831581	-3.08291	-3.10814	-3.01235	-3.03369	-3.07446	2.0349	2.0349	2.86355	1.26137	0.592514	1.0139	0.289442	1.62399	2.14251	1.26137	1.1931
hsa-miR-675-3p	2.43e-05	0.00023796	1.15066	-3.08291	-3.10814	-3.01235	-3.03369	-3.07446	-3.09603	-3.22205	-3.13428	-3.27834	-3.32109	-3.32191	-3.27732	-3.28825	-3.31458	-3.28764	-3.28542
hsa-miR-675-5p	2.43e-05	0.00023796	1.15066	-3.08291	-3.10814	-3.01235	-3.03369	-3.07446	-3.09603	-3.22205	-3.13428	-3.27834	-3.32109	-3.32191	-3.27732	-3.28825	-3.31458	-3.28764	-3.28542
hsa-miR-676-3p	2.43e-05	0.00023796	1.15066	-3.08291	-3.10814	-3.01235	-3.03369	-3.07446	-3.09603	-3.22205	-3.13428	-3.27834	-3.32109	-3.32191	-3.27732	-3.28825	-3.31458	-3.28764	-3.28542
hsa-miR-676-5p	2.43e-05	0.00023796	1.15066	-3.08291	-3.10814	-3.01235	-3.03369	-3.07446	-3.09603	-3.22205	-3.13428	-3.27834	-3.32109	-3.32191	-3.27732	-3.28825	-3.31458	-3.28764	-3.28542
hsa-miR-7-1-3p	2.43e-05	0.00023796	1.15066	-3.08291	-3.10814	-3.01235	-3.03369	-3.07446	-3.09603	-3.22205	-3.13428	-3.27834	-3.32109	-3.32191	-3.27732	-3.28825	-3.31458	-3.28764	-3.28542
hsa-miR-7-2-3p	2.43e-05	0.00023796	1.15066	-3.08291	-3.10814	-3.01235	-3.03369	-3.07446	-3.09603	-3.22205	-3.13428	-3.27834	-3.32109	-3.32191	-3.27732	-3.28825	-3.31458	-3.28764	-3.28542
hsa-miR-7-5p	2.43e-05	0.00023796	1.15066	-3.08291	-3.10814	-3.01235	-3.03369	-3.07446	-3.09603	-3.22205	-3.13428	-3.27834	-3.32109	-3.32191	-3.27732	-3.28825	-3.31458	-3.28764	-3.28542
hsa-miR-708-3p	2.43e-05	0.00023796	1.15066	-3.08291	-3.10814	-3.01235	-3.03369	-3.07446	-3.09603	-3.22205	-3.13428	-3.27834	-3.32109	-3.32191	-3.27732	-3.28825	-3.31458	-3.28764	-3.28542
hsa-miR-708-5p	2.43e-05	0.00023796	1.15066	-3.08291	-3.10814	-3.01235	-3.03369	-3.07446	-3.09603	-3.22205	-3.13428	-3.27834	-3.32109	-3.32191	-3.27732	-3.28825	-3.31458	-3.28764	-3.28542
hsa-miR-711	0.365324	0.436441	1.05129	-3.08291	-3.10814	-3.01235	-3.03369	-3.07446	-3.09603	-3.22205	-3.13428	-3.27834	-3.32109	-3.32191	-3.27732	-3.28825	-2.49438	-3.28764	-3.28542
hsa-miR-718	0.148139	0.154548	0.69203	-3.08291	-3.10814	-3.01235	-3.03369	-3.07446	-3.09603	-0.0860332	-3.13428	-3.27834	-1.5766	-2.44797	-0.78939	-3.28825	-1.62353	-1.58227	-0.739123
hsa-miR-744-3p	2.43e-05	0.00023796	1.15066	-3.08291	-3.10814	-3.01235	-3.03369	-3.07446	-3.09603	-3.22205	-3.13428	-3.27834	-3.32109	-3.32191	-3.27732	-3.28825	-3.31458	-3.28764	-3.28542
hsa-miR-744-5p	2.43e-05	0.00023796	1.15066	-3.08291	-3.10814	-3.01235	-3.03369	-3.07446	-3.09603	-3.22205	-3.13428	-3.27834	-3.32109	-3.32191	-3.27732	-3.28825	-3.31458	-3.28764	-3.28542
hsa-miR-758-3p	2.43e-05	0.00023796	1.15066	-3.08291	-3.10814	-3.01235	-3.03369	-3.07446	-3.09603	-3.22205	-3.13428	-3.27834	-3.32109	-3.32191	-3.27732	-3.28825	-3.31458	-3.28764	-3.28542
hsa-miR-758-5p	2.43e-05	0.00023796	1.15066	-3.08291	-3.10814	-3.01235	-3.03369	-3.07446	-3.09603	-3.22205	-3.13428	-3.27834	-3.32109	-3.32191	-3.27732	-3.28825	-3.31458	-3.28764	-3.28542
hsa-miR-759	2.43e-05	0.00023796	1.15066	-3.08291	-3.10814	-3.01235	-3.03369	-3.07446	-3.09603	-3.22205	-3.13428	-3.27834	-3.32109	-3.32191	-3.27732	-3.28825	-3.31458	-3.28764	-3.28542
hsa-miR-760	0.266909	0.470299	0.464252	-3.08291	-3.10814	-3.01235	-3.03369	-3.07446	-3.09603	-3.22205	-3.13428	-3.27834	-2.87566	-0.183868	-3.27732	-3.28825	-3.31458	-1.03046	-3.28542
hsa-miR-761	2.43e-05	0.00023796	1.15066	-3.08291	-3.10814	-3.01235	-3.03369	-3.07446	-3.09603	-3.22205	-3.13428	-3.27834	-3.32109	-3.32191	-3.27732	-3.28825	-3.31458	-3.28764	-3.28542
hsa-miR-762	0.428569	0.430006	1.92463	-3.08291	-3.10814	-3.01235	-3.03369	3.56217	3.02036	1.68692	2.8269	0.373177	2.11132	1.08346	-0.636215	0.709997	1.11159	1.16172	0.631801
hsa-miR-764	2.43e-05	0.00023796	1.15066	-3.08291	-3.10814	-3.01235	-3.03369	-3.07446	-3.09603	-3.22205	-3.13428	-3.27834	-3.32109	-3.32191	-3.27732	-3.28825	-3.31458	-3.28764	-3.28542
hsa-miR-765	0.00615464	0.00740819	0.239761	-3.08291	-3.10814	-3.01235	-3.03369	-3.07446	-3.09603	-3.22205	-3.13428	-3.27834	0.0522754	-0.649337	-3.27732	-1.11382	-0.481298	-1.35981	-1.12546
hsa-miR-766-3p	0.26151	0.004857	8.76561	2.70544	-3.10814	-3.01235	-3.03369	-3.07446	-3.09603	-3.22205	-3.13428	-3.27834	-3.32109	-3.01848	-3.27732	-3.28825	-3.31458	-3.28764	-3.28542
hsa-miR-766-5p	2.43e-05	0.00023796	1.15066	-3.08291	-3.10814	-3.01235	-3.03369	-3.07446	-3.09603	-3.22205	-3.13428	-3.27834	-3.32109	-3.32191	-3.27732	-3.28825	-3.31458	-3.28764	-3.28542
hsa-miR-767-3p	2.43e-05	0.00023796	1.15066	-3.08291	-3.10814	-3.01235	-3.03369	-3.07446	-3.09603	-3.22205	-3.13428	-3.27834	-3.32109	-3.32191	-3.27732	-3.28825	-3.31458	-3.28764	-3.28542
hsa-miR-767-5p	2.43e-05	0.00023796	1.15066	-3.08291	-3.10814	-3.01235	-3.03369	-3.07446	-3.09603	-3.22205	-3.13428	-3.27834	-3.32109	-3.32191	-3.27732	-3.28825	-3.31458	-3.28764	-3.28542
hsa-miR-769-3p	2.43e-05	0.00023796	1.15066	-3.08291	-3.10814	-3.01235	-3.03369	-3.07446	-3.09603	-3.22205	-3.13428	-3.27834	-3.32109	-3.32191	-3.27732	-3.28825	-3.31458	-3.28764	-3.28542
hsa-miR-769-5p	2.43e-05	0.00023796	1.15066	-3.08291	-3.10814	-3.01235	-3.03369	-3.07446	-3.09603	-3.22205	-3.13428	-3.27834	-3.32109	-3.32191	-3.27732	-3.28825	-3.31458	-3.28764	-3.28542
hsa-miR-770-5p	2.43e-05	0.00023796	1.15066	-3.08291	-3.10814	-3.01235	-3.03369	-3.07446	-3.09603	-3.22205	-3.13428	-3.27834	-3.32109	-3.32191	-3.27732	-3.28825	-3.31458	-3.28764	-3.28542
hsa-miR-802	2.43e-05	0.00023796	1.15066	-3.08291	-3.10814	-3.01235	-3.03369	-3.07446	-3.09603	-3.22205	-3.13428	-3.27834	-3.32109	-3.32191	-3.27732	-3.28825	-3.31458	-3.28764	-3.28542
hsa-miR-873-3p	2.43e-05	0.00023796	1.15066	-3.08291	-3.10814	-3.01235	-3.03369	-3.07446	-3.09603	-3.22205	-3.13428	-3.27834	-3.32109	-3.32191	-3.27732	-3.28825	-3.31458	-3.28764	-3.28542
hsa-miR-873-5p	2.43e-05	0.00023796	1.15066	-3.08291	-3.10814	-3.01235	-3.03369	-3.07446	-3.09603	-3.22205	-3.13428	-3.27834	-3.32109	-3.32191	-3.27732	-3.28825	-3.31458	-3.28764	-3.28542
hsa-miR-874	0.514832	0.750272	0.675979	-3.08291	-3.10814	-3.01235	-3.03369	-3.07446	-3.09603	-3.22205	-3.13428	-3.27834	-3.32109	-0.739123	-3.27732	-3.28825	-2.53042	-3.28764	-3.28542
hsa-miR-875-3p	2.43e-05	0.00023796	1.15066	-3.08291	-3.10814	-3.01235	-3.03369	-3.07446	-3.09603	-3.22205	-3.13428	-3.27834	-3.32109	-3.32191	-3.27732	-3.28825	-3.31458	-3.28764	-3.28542
hsa-miR-875-5p	2.43e-05	0.00023796	1.15066	-3.08291	-3.10814	-3.01235	-3.03369	-3.07446	-3.09603	-3.22205	-3.13428	-3.27834	-3.32109	-3.32191	-3.27732	-3.28825	-3.31458	-3.28764	-3.28542
hsa-miR-876-3p	2.43e-05	0.00023796	1.15066	-3.08291	-3.10814	-3.01235	-3.03369	-3.07446	-3.09603	-3.22205	-3.13428	-3.27834	-3.32109	-3.32191	-3.27732	-3.28825	-3.31458	-3.28764	-3.28542
hsa-miR-876-5p	2.43e-05	0.00023796	1.15066	-3.08291	-3.10814	-3.01235	-3.03369	-3.07446	-3.09603	-3.22205	-3.13428	-3.27834	-3.32109	-3.32191	-3.27732	-3.28825	-3.31458	-3.28764	-3.28542
hsa-miR-877-3p	2.43e-05	0.00023796	1.15066	-3.08291	-3.10814	-3.01235	-3.03369	-3.07446	-3.09603	-3.22205	-3.13428	-3.27834	-3.32109	-3.32191	-3.27732	-3.28825	-3.31458	-3.28764	-3.28542
hsa-miR-877-5p	2.43e-05	0.00023796	1.15066	-3.08291	-3.10814	-3.01235	-3.03369	-3.07446	-3.09603	-3.22205	-3.13428	-3.27834	-3.32109	-3.32191	-3.27732	-3.28825	-3.31458	-3.28764	-3.28542
hsa-miR-885-3p	2.43e-05	0.00023796	1.15066	-3.08291	-3.10814	-3.01235	-3.03369	-3.07446	-3.09603	-3.22205	-3.13428	-3.27834	-3.32109	-3.32191	-3.27732	-3.28825	-3.31458	-3.28764	-3.28542
hsa-miR-885-5p	2.43e-05	0.00023796	1.15066	-3.08291	-3.10814	-3.01235	-3.03369	-3.07446	-3.09603	-3.22205	-3.13428	-3.27834	-3.32109	-3.32191	-3.27732	-3.28825	-3.31458	-3.28764	-3.28542
hsa-miR-887	2.43e-05	0.00023796	1.15066	-3.08291	-3.10814	-3.01235	-3.03369	-3.07446	-3.09603	-3.22205	-3.13428	-3.27834	-3.32109	-3.32191	-3.27732	-3.28825	-3.31458	-3.28764	-3.28542
hsa-miR-888-3p	2.43e-05	0.00023796	1.15066	-3.08291	-3.10814	-3.01235	-3.03369	-3.07446	-3.09603	-3.22205	-3.13428	-3.27834	-3.32109	-3.32191	-3.27732	-3.28825	-3.31458	-3.28764	-3.28542
hsa-miR-888-5p	2.43e-05	0.00023796	1.15066	-3.08291	-3.10814	-3.01235	-3.03369	-3.07446	-3.09603	-3.22205	-3.13428	-3.27834	-3.32109	-3.32191	-3.27732	-3.28825	-3.31458	-3.28764	-3.28542
hsa-miR-889	2.43e-05	0.00023796	1.15066	-3.08291	-3.10814	-3.01235	-3.03369	-3.07446	-3.09603	-3.22205	-3.13428	-3.27834	-3.32109	-3.32191	-3.27732	-3.28825	-3.31458	-3.28764	-3.28542
hsa-miR-890	2.43e-05	0.00023796	1.15066	-3.08291	-3.10814	-3.01235	-3.03369	-3.07446	-3.09603	-3.22205	-3.13428	-3.27834	-3.32109	-3.32191	-3.27732	-3.28825	-3.31458	-3.28764	-3.28542
hsa-miR-891a	2.43e-05	0.00023796	1.15066	-3.08291	-3.10814	-3.01235	-3.03369	-3.07446	-3.09603	-3.22205	-3.13428	-3.27834	-3.32109	-3.32191	-3.27732	-3.28825	-3.31458	-3.28764	-3.28542
hsa-miR-891b	2.43e-05	0.00023796	1.15066	-3.08291	-3.10814	-3.01235	-3.03369	-3.07446	-3.09603	-3.22205	-3.13428	-3.27834	-3.32109	-3.32191	-3.27732	-3.28825	-3.31458	-3.28764	-3.28542
hsa-miR-892a	2.43e-05	0.00023796	1.15066	-3.08291	-3.10814	-3.01235	-3.03369	-3.07446	-3.09603	-3.22205	-3.13428	-3.27834	-3.32109	-3.32191	-3.27732	-3.28825	-3.31458	-3.28764	-3.28542
hsa-miR-892b	2.43e-05	0.00023796	1.15066	-3.08291	-3.10814	-3.01235	-3.03369	-3.07446	-3.09603	-3.22205	-3.13428	-3.27834	-3.32109	-3.32191	-3.27732	-3.28825	-3.31458	-3.28764	-3.28542
hsa-miR-892c-3p	2.43e-05	0.00023796	1.15066	-3.08291	-3.10814	-3.01235	-3.03369	-3.07446	-3.09603	-3.22205	-3.13428	-3.27834	-3.32109	-3.32191	-3.27732	-3.28825	-3.31458	-3.28764	-3.28542
hsa-miR-892c-5p	2.43e-05	0.00023796	1.15066	-3.08291	-3.10814	-3.01235	-3.03369	-3.07446	-3.09603	-3.22205	-3.13428	-3.27834	-3.32109	-3.32191	-3.27732	-3.28825	-3.31458	-3.28764	-3.28542
hsa-miR-9-3p	2.43e-05	0.00023796	1.15066	-3.08291	-3.10814	-3.01235	-3.03369	-3.07446	-3.09603	-3.22205	-3.13428	-3.27834	-3.32109	-3.32191	-3.27732	-3.28825	-3.31458	-3.28764	-3.28542
hsa-miR-9-5p	2.43e-05	0.00023796	1.15066	-3.08291	-3.10814	-3.01235	-3.03369	-3.07446	-3.09603	-3.22205	-3.13428	-3.27834	-3.32109	-3.32191	-3.27732	-3.28825	-3.31458	-3.28764	-3.28542
hsa-miR-920	2.43e-05	0.00023796	1.15066	-3.08291	-3.10814	-3.01235	-3.03369	-3.07446	-3.09603	-3.22205	-3.13428	-3.27834	-3.32109	-3.32191	-3.27732	-3.28825	-3.31458	-3.28764	-3.28542
hsa-miR-921	2.43e-05	0.00023796	1.15066	-3.08291	-3.10814	-3.01235	-3.03369	-3.07446	-3.09603	-3.22205	-3.13428	-3.27834	-3.32109	-3.32191	-3.27732	-3.28825	-3.31458	-3.28764	-3.28542
hsa-miR-922	2.43e-05	0.00023796	1.15066	-3.08291	-3.10814	-3.01235	-3.03369	-3.07446	-3.09603	-3.22205	-3.13428	-3.27834	-3.32109	-3.32191	-3.27732	-3.28825	-3.31458	-3.28764	-3.28542
hsa-miR-924	2.43e-05	0.00023796	1.15066	-3.08291	-3.10814	-3.01235	-3.03369	-3.07446	-3.09603	-3.22205	-3.13428	-3.27834	-3.32109	-3.32191	-3.27732	-3.28825	-3.31458	-3.28764	-3.28542
hsa-miR-92a-1-5p	2.43e-05	0.00023796	1.15066	-3.08291	-3.10814	-3.01235	-3.03369	-3.07446	-3.09603	-3.22205	-3.13428	-3.27834	-3.32109	-3.32191	-3.27732	-3.28825	-3.31458	-3.28764	-3.28542
hsa-miR-92a-2-5p	2.43e-05	0.00023796	1.15066	-3.08291	-3.10814	-3.01235	-3.03369	-3.07446	-3.09603	-3.22205	-3.13428	-3.27834	-3.32109	-3.32191	-3.27732	-3.28825	-3.31458	-3.28764	-3.28542
hsa-miR-92a-3p	0.0467139	0.0374506	0.298053	-3.08291	-3.10814	-3.01235	-3.03369	-3.07446	-3.09603	-3.22205	-3.13428	-3.27834	0.184418	-0.760021	-0.675948	-3.28825	-2.55639	-1.67955	-3.28542
hsa-miR-92b-3p	2.43e-05	0.00023796	1.15066	-3.08291	-3.10814	-3.01235	-3.03369	-3.07446	-3.09603	-3.22205	-3.13428	-3.27834	-3.32109	-3.32191	-3.27732	-3.28825	-3.31458	-3.28764	-3.28542
hsa-miR-92b-5p	2.43e-05	0.00023796	1.15066	-3.08291	-3.10814	-3.01235	-3.03369	-3.07446	-3.09603	-3.22205	-3.13428	-3.27834	-3.32109	-3.32191	-3.27732	-3.28825	-3.31458	-3.28764	-3.28542
hsa-miR-93-3p	2.43e-05	0.00023796	1.15066	-3.08291	-3.10814	-3.01235	-3.03369	-3.07446	-3.09603	-3.22205	-3.13428	-3.27834	-3.32109	-3.32191	-3.27732	-3.28825	-3.31458	-3.28764	-3.28542
hsa-miR-93-5p	0.146021	0.215578	0.353377	-3.08291	-3.10814	-3.01235	-3.03369	-3.07446	-3.09603	-3.22205	-3.13428	-3.27834	-0.52384	-1.01727	-0.0733799	-3.28825	-3.31458	-3.28764	-3.28542
hsa-miR-933	2.43e-05	0.00023796	1.15066	-3.08291	-3.10814	-3.01235	-3.03369	-3.07446	-3.09603	-3.22205	-3.13428	-3.27834	-3.32109	-3.32191	-3.27732	-3.28825	-3.31458	-3.28764	-3.28542
hsa-miR-934	2.43e-05	0.00023796	1.15066	-3.08291	-3.10814	-3.01235	-3.03369	-3.07446	-3.09603	-3.22205	-3.13428	-3.27834	-3.32109	-3.32191	-3.27732	-3.28825	-3.31458	-3.28764	-3.28542
hsa-miR-935	2.43e-05	0.00023796	1.15066	-3.08291	-3.10814	-3.01235	-3.03369	-3.07446	-3.09603	-3.22205	-3.13428	-3.27834	-3.32109	-3.32191	-3.27732	-3.28825	-3.31458	-3.28764	-3.28542
hsa-miR-936	0.261797	0.487326	0.216727	-3.08291	-3.10814	-3.01235	-3.03369	-3.07446	-3.09603	-3.22205	-3.13428	-3.27834	-3.32109	-3.32191	-3.27732	1.1931	-3.31458	-3.28764	0.512673
hsa-miR-937-3p	2.43e-05	0.00023796	1.15066	-3.08291	-3.10814	-3.01235	-3.03369	-3.07446	-3.09603	-3.22205	-3.13428	-3.27834	-3.32109	-3.32191	-3.27732	-3.28825	-3.31458	-3.28764	-3.28542
hsa-miR-937-5p	0.00146277	0.0102547	0.253483	-3.08291	-3.10814	-3.01235	-3.03369	-3.07446	-3.09603	0.373177	-3.13428	-0.0552746	0.300676	0.402063	-3.27732	0.383673	0.0787163	0.383673	0.135307
hsa-miR-938	2.43e-05	0.00023796	1.15066	-3.08291	-3.10814	-3.01235	-3.03369	-3.07446	-3.09603	-3.22205	-3.13428	-3.27834	-3.32109	-3.32191	-3.27732	-3.28825	-3.31458	-3.28764	-3.28542
hsa-miR-939-3p	2.43e-05	0.00023796	1.15066	-3.08291	-3.10814	-3.01235	-3.03369	-3.07446	-3.09603	-3.22205	-3.13428	-3.27834	-3.32109	-3.32191	-3.27732	-3.28825	-3.31458	-3.28764	-3.28542
hsa-miR-939-5p	0.047557	0.05507	0.471329	-3.08291	-3.10814	-3.01235	-3.03369	-3.07446	-3.09603	0.25626	-3.13428	-3.27834	-1.62353	-0.855729	-3.27732	-0.106771	-0.200924	-0.859996	-0.215514
hsa-miR-940	0.0043662	0.00112564	16.2603	4.66501	3.60188	6.92169	7.29293	4.2657	3.50579	1.69706	2.07663	1.22605	1.28188	1.11159	1.68692	0.665169	0.582132	2.14251	2.0349
hsa-miR-941	2.43e-05	0.00023796	1.15066	-3.08291	-3.10814	-3.01235	-3.03369	-3.07446	-3.09603	-3.22205	-3.13428	-3.27834	-3.32109	-3.32191	-3.27732	-3.28825	-3.31458	-3.28764	-3.28542
hsa-miR-942	2.43e-05	0.00023796	1.15066	-3.08291	-3.10814	-3.01235	-3.03369	-3.07446	-3.09603	-3.22205	-3.13428	-3.27834	-3.32109	-3.32191	-3.27732	-3.28825	-3.31458	-3.28764	-3.28542
hsa-miR-943	2.43e-05	0.00023796	1.15066	-3.08291	-3.10814	-3.01235	-3.03369	-3.07446	-3.09603	-3.22205	-3.13428	-3.27834	-3.32109	-3.32191	-3.27732	-3.28825	-3.31458	-3.28764	-3.28542
hsa-miR-944	2.43e-05	0.00023796	1.15066	-3.08291	-3.10814	-3.01235	-3.03369	-3.07446	-3.09603	-3.22205	-3.13428	-3.27834	-3.32109	-3.32191	-3.27732	-3.28825	-3.31458	-3.28764	-3.28542
hsa-miR-95	2.43e-05	0.00023796	1.15066	-3.08291	-3.10814	-3.01235	-3.03369	-3.07446	-3.09603	-3.22205	-3.13428	-3.27834	-3.32109	-3.32191	-3.27732	-3.28825	-3.31458	-3.28764	-3.28542
[truncated: 8 more rows]
